# Supplementary material for: Balancing risks and benefits of cannabis use: umbrella review of meta-analyses of randomised controlled trials and observational studies
Source: PubMed Central journal article supplement — BMJ. 2023 Aug 30;382:e072348. doi: 10.1136/bmj-2022-072348 (PMC10466434; doi:10.1136/bmj-2022-072348), 2023-08-30
Supplement: solm072348.ww1.pdf [file solm072348.ww1.pdf]

**Balancing risks and benefits of cannabis use: umbrella review of meta-analyses of randomised controlled trials and observational studies**

Marco Solmi(<https://orcid.org/0000-0003-4877-7233>),<sup>1-7</sup> associate professor, Marco De Toffol,<sup>8</sup> psychiatrist, Jong Yeob Kim,<sup>9</sup> public health doctor, Min Je Choi,<sup>9</sup> psychiatrist, Brendon Stubbs,<sup>10,11</sup> advanced fellow, Trevor Thompson,<sup>12</sup> associate professor of clinical research, Joseph Firth,<sup>13,14</sup> research fellow, Alessandro Miola,<sup>15</sup> Giovanni Croatto,<sup>16</sup> psychiatrist, Francesca Baggio,<sup>16</sup> psychiatrist, Silvia Michelon,<sup>17</sup> psychiatrist, Luca Ballan,<sup>17</sup> psychiatrist, Björn Gerdle,<sup>18</sup> professor, Francesco Monaco,<sup>19,20</sup> psychiatrist, Pierluigi Simonato,<sup>21</sup> psychiatrist, Paolo Scocco,<sup>22</sup> psychiatrist, Valdo Ricca,<sup>23</sup> Professor, Giovanni Castellini,<sup>23</sup> associate professor, Michele Fornaro,<sup>24</sup> assistant professor, Andrea Murru,<sup>25</sup> researcher, Eduard Vieta,<sup>25</sup> professor, Paolo Fusar-Poli,<sup>5,26</sup> professor, Corrado Barbui,<sup>27</sup> professor, John P A Ioannidis,<sup>28-30</sup> professor, André F Carvalho,<sup>31</sup> senior researcher, Joaquim Radua,<sup>32</sup> associate professor, Christoph U Correll,<sup>7,33-34</sup> professor, Samuele Cortese,<sup>6,35-38</sup> professor, Robin M Murray,<sup>39</sup> professor, David Castle,<sup>40,41</sup> professor, Jae Il Shin,<sup>42,43</sup> professor, Elena Dragioti,<sup>18,44</sup> associate professor

<sup>1</sup>Department of Psychiatry, University of Ottawa, Ontario, ON, Canada

<sup>2</sup>On Track: The Champlain First Episode Psychosis Program, Department of Mental Health, The Ottawa Hospital, Ontario, ON, Canada

<sup>3</sup>Ottawa Hospital Research Institute, Clinical Epidemiology Program, University of Ottawa, Ottawa, ON, Canada

<sup>4</sup>School of Epidemiology and Public Health, Faculty of Medicine, University of Ottawa, Ottawa, ON, Canada

<sup>5</sup>Early Psychosis: Interventions and Clinical detection Lab, Institute of Psychiatry, Psychology and Neuroscience, Department of Psychosis Studies, King's College London, London, UK

<sup>6</sup>Centre for Innovation in Mental Health-Developmental Lab, School of Psychology, University of Southampton, and NHS Trust, Southampton, UK

<sup>7</sup>Department of Child and Adolescent Psychiatry, Charité Universitätsmedizin, Berlin, Germany

<sup>8</sup>Psychiatry Unit, Veris Delli Ponti Scorrano Hospital, Department of Mental Health, ASL Lecce, Lecce, Italy

<sup>9</sup>Yonsei University College of Medicine, Seoul, South Korea

<sup>10</sup>Department of Psychological Medicine, Institute of Psychiatry, Psychology and Neuroscience, King's College London, London, UK

<sup>11</sup>Physiotherapy Department, South London and Maudsley NHS Foundation Trust, London, UK

<sup>12</sup>Centre of Chronic Illness and Ageing, University of Greenwich, London, UK

<sup>13</sup>Division of Psychology and Mental Health, University of Manchester, Manchester Academic Health Science Centre, Manchester, UK

<sup>14</sup>Greater Manchester Mental Health NHS Foundation Trust, Manchester Academic Health Science Centre, Manchester, UK

<sup>15</sup>Neurosciences Department, Padua Neuroscience Center, University of Padua, Italy

<sup>16</sup>Mental Health Department, AULSS 3 Serenissima, Mestre, Venice, Italy

<sup>17</sup>Department of Mental Health, AULSS 7 Pedemontana Veneto, Italy

<sup>18</sup>Pain and Rehabilitation Centre, Department of Health, Medicine and Caring Sciences, Linköping University, Linköping, Sweden

<sup>19</sup>Department of Mental Health, Asl Salerno, Salerno, Italy

<sup>20</sup>European Biomedical Research Institute of Salerno, Salerno, Italy

- <sup>21</sup>Department of Clinical, Pharmaceutical and Biological Sciences, School of Life and Medical Sciences, University of Hertfordshire, Hatfield, UK
- <sup>22</sup>Mental Health Department, ULSS 6 Euganea, Padova, Italy
- <sup>23</sup>Psychiatry Unit, Department of Health Sciences, University of Florence, Florence, Italy
- <sup>24</sup>Section of Psychiatry, Department of Neuroscience, University School of Medicine Federico II, Naples, Italy
- <sup>25</sup>Institute of Neuroscience, Hospital Clinic, University of Barcelona, IDIBAPS, CIBERSAM, Barcelona, Catalonia, Spain
- <sup>26</sup>Department of Brain and Behavioural Sciences, University of Pavia, Pavia, Italy
- <sup>27</sup>WHO Collaborating Centre for Research and Training in Mental Health and Service Evaluation, Department of Neuroscience, Biomedicine and Movement Sciences, Section of Psychiatry, University of Verona, Verona, Italy
- <sup>28</sup>Meta-Research Innovation Center at Stanford, Stanford University, Stanford, CA, USA
- <sup>29</sup>Meta-Research Innovation Center Berlin, Berlin Institute of Health, Charité Universitätsmedizin, Berlin, Germany
- <sup>30</sup>Departments of Medicine, of Epidemiology and Population Health, of Biomedical Data Science, and of Statistics, Stanford University, Stanford, CA, USA
- <sup>31</sup>IMPACT - The Institute for Mental and Physical Health and Clinical Translation, School of Medicine, Barwon Health, Deakin University, Geelong, VIC, Australia
- <sup>32</sup>Institut d'Investigacions Biomediques August Pi i Sunyer, CIBERSAM, Instituto de Salud Carlos III, University of Barcelona, Barcelona, Spain
- <sup>33</sup>Department of Psychiatry, Zucker Hillside Hospital, Northwell Health, Glen Oaks, NY, USA
- <sup>34</sup>Department of Psychiatry and Molecular Medicine, Donald and Barbara Zucker School of Medicine at Hofstra/Northwell, Hempstead, NY, USA
- <sup>35</sup>Clinical and Experimental Sciences (Central Nervous System and Psychiatry), Faculty of Medicine, University of Southampton, Southampton, UK
- <sup>36</sup>Solent NHS Trust, Southampton, UK
- <sup>37</sup>Division of Psychiatry and Applied Psychology, School of Medicine, University of Nottingham, Nottingham, UK
- <sup>38</sup>Hassenfeld Children's Hospital at NYU Langone, New York University Child Study Center, New York City, New York, NY, USA
- <sup>39</sup>Psychosis Studies, Institute of Psychiatry, Psychology and Neuroscience, King's College of London, London, UK
- <sup>40</sup>Department of Psychiatry, University of Tasmania, Sandy Bay, TAS, Australia
- <sup>41</sup>Co-Director, Centre for Mental Health Service Innovation, Department of Health, Tasmania, Australia
- <sup>42</sup>Department of Pediatrics, Yonsei University College of Medicine, Seoul, South Korea
- <sup>43</sup>Severance Underwood Meta-research Center, Institute of Convergence Science, Yonsei University, Seoul, South Korea
- <sup>44</sup>Research Laboratory Psychology of Patients, Families and Health Professionals, Department of Nursing, School of Health Sciences, University of Ioannina, Ioannina, Greece

**# Corresponding author**

Marco Solmi, MD, PhD

\*, joint first authors

#, contributed equally to corresponding author

## eMethods

### *Search key*

(cannab\* or marijuana or THC or CBD) and (systematic or meta-analy\*)

### *Transformation of effect sizes*

When possible, effect sizes have been converted to eOR, to provide a common effect size with an unique scale<sup>1</sup>. The eOR for binary outcomes were considered equal to original metric eg, hazard ratio, risk ratio, odds ratio, as the re-calculation of an OR would have required the original 2x2 table, which was not available in individual studies. For continuous outcomes, limited to Hedge's g, standardized mean difference, and Cohen's d, we performed a transformation to a logOR based on the assumption that an underlying continuous variable produces a logistic distribution of equal standard deviation in the two intervention groups. In order to improve communication of clinical value of findings, we have made the eOR greater than 1 for clinically harmful associations. For instance, an association with increased risk of psychosis has an eOR=1.71, 95%CI=1.47-2.00, while an association with less seizures has an eOR=0.59, 95%CI=0.38-0.92.

### *Credibility of observational evidence*

Credibility of results of meta-analyses of observational studies were graded into convincing (class I), highly suggestive (class II), suggestive (class III), weak (class IV), and no evidence, according to following criteria previously implemented in numerous umbrella reviews<sup>2-10</sup>. For class I, all criteria below had to be met i) more than 1000 cases, ii) significant summary associations ( $p < 10^{-6}$ ) per random-effects calculations, iii) no evidence of small-study effects, iv) no evidence of excess of significance bias, v) prediction intervals not including the null value, vi) largest study nominally significant ( $p < 0.05$ ), vii) not large heterogeneity (i.e.,  $I^2 < 50\%$ ). For class II, i) more than 1000 cases, ii) significant summary associations ( $p < 10^{-6}$ ) per random-effects calculation, iii) largest study nominally significant ( $p < 0.05$ ). For class III, i) more than 1000 cases, ii) significant summary associations ( $p < 10^{-3}$ ) per random-effects calculations. For class IV, i) all other associations with  $p < 0.05$ . No evidence was defined when  $p > 0.05$ .

### *Certainty of evidence from randomized controlled trials*

We classified evidence from meta-analyses of RCTs using the GRADE framework, which allows to classify certainty of evidence as high, moderate, low, or very low. As recommended by GRADE, level of evidence was determined by risk of bias, inconsistency, indirectness, imprecision, publication bias<sup>11</sup>.

The following criteria were used:

- i) for risk of bias, no downgrade if  $>75\%$  RCTs had low risk of bias, one downgrade if  $<75\%$  had low risk of bias, two downgrades if  $<50\%$  have low risk of bias
- ii) for inconsistency, no downgrade if  $I^2 < 75\%$ , one downgrade if  $>75\%$ , two downgrades if more than 90%
- iii) for indirectness, we downgraded one or two levels if one or two or more of the following conditions applied: meta-analyses were mixing clinical and non-clinical populations, or cannabinoids with other interventions, or where mixing active, inactive, and placebo control groups.
- iv) for imprecision, no downgrade if sample size  $>200$ , one downgrade 100-199, two downgrades 1-99 or the 95% CI of summary estimate had overlap with the effect size threshold of clinical importance, which we defined as interval of 0.9 to 1.1
- v) for publication bias no downgrade if publication bias is undetected by tests or the reviewers say that they did a systematic search of multiple databases and did not restrict their search language, one downgrade if publication bias is strongly suspected by tests or the reviewers say that did not perform a systematic search of multiple databases and restricted their search language

Evidence could be upgraded according to the following rules<sup>12</sup>. Upgrade of one level is possible with large effect size (i.e. risk ratio  $< 0.5$  or  $> 2.0$ , or standardized mean difference  $> 0.8$ , based on direct evidence with no

plausible or possible confounders). Upgrade of two levels is possible with very large effect size (i.e. risk ratio  $<0.2$  or  $>5.0$ , or standardized mean difference  $>1.2$ , based on direct evidence without risk of bias or imprecision).

Starting from high, level of evidence was downgraded to moderate with one or two downgrades, to low with three or four downgrades, and to very low with five or six downgrades.

## Protocol amendments

The following amendments to the original protocol have been implemented:

We did not conduct fixed effect model meta-analyses, and only conducted random effects meta-analyses, as we did not believe the assumption for using fixed effect meta-analysis applies to the included meta-analyses. We do not believe only one true effect size exists for such a heterogeneous population (human population) and exposure (i.e. different types of cannabis).

We originally planned to also include Mendelian randomization studies. For feasibility considerations related with the amount of information reported in this work, we will report findings from Mendelian randomization studies in a separate publication.

The PRIOR checklist was published after we prepared our protocol. We believe the PRIOR checklist better applies to this umbrella review than an adapted PRISMA checklist, and we have now used that instead.

We did not conduct all pre-planned sensitivity analyses, for the following reasons:

Based on quality of meta-analyses: because individual studies and not meta-analyses are the unit of analyses;

Age group: because meta-analyses were already focusing on one age group only, and if not, individual studies were mixing age groups;

Follow-up duration: because this information was seldomly reported

Year of data collection: because splitting dates by decade left only one study per decade, precluding any meta-analysis

Sample size: because sample size is already accounted for in the overall credibility assessment criteria

Study population: because meta-analyses were already organized by population

Type of cannabinoid and cannabis: because we already divided recreational cannabis from medical cannabis or cannabis-based medicines splitting observational and interventional evidence, and because cannabidiol and THC were already separated in meta-analyses.

Amount of cannabis, since this information was not reported

We conducted the following sensitivity analyses to all classes of observational evidence:

Removing the >1,000 cases criterion

We conducted the following sensitivity analyses only to class I and II observational evidence:

Adjusted studies only

Cohort studies only

Supplementary table 1. PRIOR checklist<sup>13</sup>

| Section<br>Topic        | #   | Item                                                                                                                                                                                                                                                                                                          | Location reported          |
|-------------------------|-----|---------------------------------------------------------------------------------------------------------------------------------------------------------------------------------------------------------------------------------------------------------------------------------------------------------------|----------------------------|
| <b>TITLE</b>            |     |                                                                                                                                                                                                                                                                                                               |                            |
| Title                   | 1   | Identify the report as an overview of reviews.                                                                                                                                                                                                                                                                | Pg 1                       |
| <b>ABSTRACT</b>         |     |                                                                                                                                                                                                                                                                                                               |                            |
| Abstract                | 2   | Provide a comprehensive and accurate summary of the purpose, methods, and results of the overview of reviews.                                                                                                                                                                                                 | Pg 2-3                     |
| <b>INTRODUCTION</b>     |     |                                                                                                                                                                                                                                                                                                               |                            |
| Rationale               | 3   | Describe the rationale for conducting the overview of reviews in the context of existing knowledge.                                                                                                                                                                                                           | Pg 5                       |
| Objectives              | 4   | Provide an explicit statement of the objective(s) or question(s) addressed by the overview of reviews.                                                                                                                                                                                                        | Pg 6                       |
| <b>METHODS</b>          |     |                                                                                                                                                                                                                                                                                                               |                            |
| Eligibility criteria    | 5a  | Specify the inclusion and exclusion criteria for the overview of reviews. If supplemental primary studies were included, this should be stated, with a rationale.                                                                                                                                             | Pg 6                       |
|                         | 5b  | Specify the definition of 'systematic review' as used in the inclusion criteria for the overview of reviews.                                                                                                                                                                                                  | NA                         |
| Information sources     | 6   | Specify all databases, registers, websites, organizations, reference lists, and other sources searched or consulted to identify systematic reviews and supplemental primary studies (if included).<br>Specify the date when each source was last searched or consulted.                                       | Protocol, pg 6, eMethods   |
| Search strategy         | 7   | Present the full search strategies for all databases, registers and websites, such that they could be reproduced. Describe any search filters and limits applied.                                                                                                                                             | eMethods                   |
| Selection process       | 8a  | Describe the methods used to decide whether a systematic review or supplemental primary study (if included) met the inclusion criteria of the overview of reviews.                                                                                                                                            | Pg 6                       |
|                         | 8b  | Describe how overlap in the populations, interventions, comparators, and/or outcomes of systematic reviews was identified and managed during study selection.                                                                                                                                                 | Pg 6                       |
| Data collection process | 9a  | Describe the methods used to collect data from reports.                                                                                                                                                                                                                                                       | Pg 6-7                     |
|                         | 9b  | If applicable, describe the methods used to identify and manage primary study overlap at the level of the comparison and outcome during data collection. For each outcome, specify the method used to illustrate and/or quantify the degree of primary study overlap across systematic reviews.               | NA                         |
|                         | 9c  | If applicable, specify the methods used to manage discrepant data across systematic reviews during data collection.                                                                                                                                                                                           | NA                         |
| Data items              | 10  | List and define all variables and outcomes for which data were sought. Describe any assumptions made and/or measures taken to identify and clarify missing or unclear information.                                                                                                                            | Pg 6-7                     |
| Risk of bias assessment | 11a | Describe the methods used to <u>assess</u> risk of bias or methodological quality of the included systematic reviews.                                                                                                                                                                                         | Pg 7-8, Protocol, eMethods |
|                         | 11b | Describe the methods used to <u>collect</u> data on (from the systematic reviews) and/or <u>assess</u> the risk of bias of the primary studies included in the systematic reviews. Provide a justification for instances where flawed, incomplete, or missing assessments are identified but not re-assessed. | Pg 6-7                     |

|                                                            |     |                                                                                                                                                                                                                                                                                                                  |                            |
|------------------------------------------------------------|-----|------------------------------------------------------------------------------------------------------------------------------------------------------------------------------------------------------------------------------------------------------------------------------------------------------------------|----------------------------|
|                                                            | 11c | Describe the methods used to <u>assess</u> the risk of bias of supplemental primary studies (if included).                                                                                                                                                                                                       | NA                         |
| Synthesismethods                                           | 12a | Describe the methods used to summarize or synthesize results and provide a rationale for the choice(s).                                                                                                                                                                                                          | Pg 7-8                     |
|                                                            | 12b | Describe any methods used to explore possible causes of heterogeneity among results.                                                                                                                                                                                                                             | Pg 7-8, Protocol, eMethods |
|                                                            | 12c | Describe any sensitivity analyses conducted to assess the robustness of the synthesized results.                                                                                                                                                                                                                 | Pg 7-8, Protocol, eMethods |
| Reporting bias assessment                                  | 13  | Describe the methods used to <u>collect</u> data on (from the systematic reviews) and/or <u>assess</u> the risk of bias due to missing results in a summary or synthesis (arising from reporting biases at the level of the systematic reviews, primary studies, and supplemental primary studies, if included). | Pg 7-8, Protocol, eMethods |
| Certainty assessment                                       | 14  | Describe the methods used to <u>collect</u> data on (from the systematic reviews) and/or <u>assess</u> certainty (or confidence) in the body of evidence for an outcome.                                                                                                                                         | Pg 7-8, Protocol, eMethods |
| <b>RESULTS</b>                                             |     |                                                                                                                                                                                                                                                                                                                  |                            |
| Systematic review and supplemental primary study selection | 15a | Describe the results of the search and selection process, including the number of records screened, assessed for eligibility, and included in the overview of reviews, ideally with a flow diagram.                                                                                                              | Figure 1, Pg 8             |
|                                                            | 15b | Provide a list of studies that might appear to meet the inclusion criteria, but were excluded, with the main reason for exclusion.                                                                                                                                                                               | Appendix                   |

| Section<br>Topic                                                                      | #   | Item                                                                                                                                                                                                                                                                                                           | Location<br>reported      |
|---------------------------------------------------------------------------------------|-----|----------------------------------------------------------------------------------------------------------------------------------------------------------------------------------------------------------------------------------------------------------------------------------------------------------------|---------------------------|
| Characteristics of systematic reviews and supplemental primary studies                | 16  | Cite each included systematic review and supplemental primary study (if included) and present its characteristics.                                                                                                                                                                                             | Table 1                   |
| Primary study overlap                                                                 | 17  | Describe the extent of primary study overlap across the included systematic reviews.                                                                                                                                                                                                                           | NA                        |
| Risk of bias in systematic reviews, primary studies, and supplemental primary studies | 18a | Present assessments of risk of bias or methodological quality for each included systematic review.                                                                                                                                                                                                             | Pg 8-10, Tables, appendix |
|                                                                                       | 18b | Present assessments ( <u>collected</u> from systematic reviews or <u>assessed</u> anew) of the risk of bias of the primary studies included in the systematic reviews.                                                                                                                                         | NA                        |
|                                                                                       | 18c | Present assessments of the risk of bias of supplemental primary studies (if included).                                                                                                                                                                                                                         | NA                        |
| Summary or synthesis of results                                                       | 19a | For all outcomes, summarize the evidence from the systematic reviews and supplemental primary studies (if included). If meta-analyses were done, present for each the summary estimate and its precision and measures of statistical heterogeneity. If comparing groups, describe the direction of the effect. | Pg 8-11, Tables, appendix |
|                                                                                       | 19b | If meta-analyses were done, present results of all investigations of possible causes of heterogeneity.                                                                                                                                                                                                         | Pg 8-11, Tables, appendix |
|                                                                                       | 19c | If meta-analyses were done, present results of all sensitivity analyses conducted to assess the robustness of synthesized results.                                                                                                                                                                             | Pg 8-11, Tables, appendix |



|                                          |     |                                                                                                                                                                                                                                                                                                                                                                                 |                           |
|------------------------------------------|-----|---------------------------------------------------------------------------------------------------------------------------------------------------------------------------------------------------------------------------------------------------------------------------------------------------------------------------------------------------------------------------------|---------------------------|
| Reporting biases                         | 20  | Present assessments ( <i>collected</i> from systematic reviews and/or <i>assessed</i> a new) of the risk of bias due to missing primary studies, analyses, or results in a summary or synthesis (arising from reporting biases at the levels of the systematic reviews, primary studies, and supplemental primary studies, if included) for each summary or synthesis assessed. | Pg 8-11, Tables, appendix |
| Certainty of evidence                    | 21  | Present assessments ( <i>collected</i> or <i>assessed</i> anew) of certainty (or confidence) in the body of evidence for each outcome.                                                                                                                                                                                                                                          | Pg 8-11, Tables, appendix |
| <b>DISCUSSION</b>                        |     |                                                                                                                                                                                                                                                                                                                                                                                 |                           |
| Discussion                               | 22a | Summarize the main findings, including any discrepancies in findings across the included systematic reviews and supplemental primary studies (if included).                                                                                                                                                                                                                     | Pg 11-15                  |
|                                          | 22b | Provide a general interpretation of the results in the context of other evidence.                                                                                                                                                                                                                                                                                               | Pg 11-15                  |
|                                          | 22c | Discuss any limitations of the evidence from systematic reviews, their primary studies, and supplemental primary studies (if included) included in the overview of reviews. Discuss any limitations of the overview of reviews methods used.                                                                                                                                    | Pg 14-15                  |
|                                          | 22d | Discuss implications for practice, policy, and future research (both systematic reviews and primary research). Consider the relevance of the findings to the end users of the overview of reviews, e.g., healthcare providers, policymakers, patients, among others.                                                                                                            | Pg 14-15                  |
| <b>OTHER INFORMATION</b>                 |     |                                                                                                                                                                                                                                                                                                                                                                                 |                           |
| Registration and protocol                | 23a | Provide registration information for the overview of reviews, including register name and registration number, or state that the overview of reviews was not registered.                                                                                                                                                                                                        | Pg 6                      |
|                                          | 23b | Indicate where the overview of reviews protocol can be accessed, or state that a protocol was not prepared.                                                                                                                                                                                                                                                                     | Pg 6                      |
|                                          | 23c | Describe and explain any amendments to information provided at registration or in the protocol. Indicate the stage of the overview of reviews at which amendments were made.                                                                                                                                                                                                    | Appendix                  |
| Support                                  | 24  | Describe sources of financial or non-financial support for the overview of reviews, and the role of the funders or sponsors in the overview of reviews.                                                                                                                                                                                                                         | Pg 15-16                  |
| Competing interests                      | 25  | Declare any competing interests of the overview of reviews' authors.                                                                                                                                                                                                                                                                                                            | Pg 15-16                  |
| Author information                       | 26a | Provide contact information for the corresponding author.                                                                                                                                                                                                                                                                                                                       | Pg 1                      |
|                                          | 26b | Describe the contributions of individual authors and identify the guarantor of the overview of reviews.                                                                                                                                                                                                                                                                         | Pg 15-16                  |
| Availability of data and other materials | 27  | Report which of the following are available, where they can be found, and under which conditions they may be accessed: template data collection forms; data collected from included systematic reviews and supplemental primary studies; analytic code; any other materials used in the overview of reviews.                                                                    | Pg 16                     |

Supplementary table 2. PRISMA 2020 abstract checklist adapted for umbrella reviews<sup>14</sup>

| PRISMA v1.0 for Abstracts checklist* |        |                                                                                                                                                                                                                                                                                                                                    |           |
|--------------------------------------|--------|------------------------------------------------------------------------------------------------------------------------------------------------------------------------------------------------------------------------------------------------------------------------------------------------------------------------------------|-----------|
| Section and topic                    | Item # | Checklist item                                                                                                                                                                                                                                                                                                                     | Reported? |
| <b>Title</b>                         |        |                                                                                                                                                                                                                                                                                                                                    |           |
| Title                                | 1      | Identify the report as a UR.                                                                                                                                                                                                                                                                                                       | y         |
| <b>Background</b>                    |        |                                                                                                                                                                                                                                                                                                                                    |           |
| Objectives                           | 2      | Provide an explicit statement of the main objective(s) or question(s) the UR addresses.                                                                                                                                                                                                                                            | y         |
| <b>Methods</b>                       |        |                                                                                                                                                                                                                                                                                                                                    |           |
| Eligibility criteria                 | 3      | Specify the inclusion and exclusion criteria for the UR.                                                                                                                                                                                                                                                                           | y         |
| Information sources                  | 4      | Specify the information sources (e.g. databases, registers) used to identify studies and the date when each was last searched.                                                                                                                                                                                                     | y         |
| Quality                              | 5      | Specify the methods used to assess quality in the included reviews/meta-analyses.                                                                                                                                                                                                                                                  | y         |
| Synthesis of results                 | 6      | Specify the methods used to present and synthesise results, including exploring biases.                                                                                                                                                                                                                                            | y         |
| <b>Results</b>                       |        |                                                                                                                                                                                                                                                                                                                                    |           |
| Included studies                     | 7      | Give the total number of included comparisons, reviews, studies, and describe reviews' quality                                                                                                                                                                                                                                     | y         |
| Synthesis of results                 | 8      | Present results for main outcomes or of most credible evidence, preferably indicating the number of included studies and participants for each. If meta-analysis was done, report the summary estimate and confidence/credible interval. If comparing groups, indicate the direction of the effect (i.e. which group is favoured). | y         |
| <b>Discussion</b>                    |        |                                                                                                                                                                                                                                                                                                                                    |           |
| Limitations of evidence              | 9      | Provide a brief summary of the limitations of the evidence included in the UR (e.g. review quality, inconsistency and imprecision).                                                                                                                                                                                                | y         |
| Interpretation                       | 10     | Provide a general interpretation of the results and important implications.                                                                                                                                                                                                                                                        | y         |
| <b>Other</b>                         |        |                                                                                                                                                                                                                                                                                                                                    |           |
| Funding                              | 11     | Specify the primary source of funding for the UR.                                                                                                                                                                                                                                                                                  | y         |
| Registration                         | 12     | Provide the register name and registration number.                                                                                                                                                                                                                                                                                 | y         |

Supplementary table 3. Studies excluded, with reason for exclusion.

| <b>Author, year</b>              | <b>Reason for exclusion</b>             |
|----------------------------------|-----------------------------------------|
| Abrams, 2018 <sup>15</sup>       | No meta-analysis                        |
| Addington, 2014 <sup>16</sup>    | No meta-analysis                        |
| Alharbi, 2016 <sup>17</sup>      | No meta-analysis                        |
| Al-Kahlil, 2015 <sup>18</sup>    | Not largest                             |
| Allan, 2018 <sup>19</sup>        | Not largest meta-analysis               |
| Allen, 2018 <sup>20</sup>        | No cannabis/cannabinoid related outcome |
| Alshaarawy, 2015 <sup>21</sup>   | No meta-analysis                        |
| Anand, 2009 <sup>22</sup>        | No meta-analysis                        |
| Ananth, 2018 <sup>23</sup>       | No meta-analysis                        |
| Andrade, 2016 <sup>24</sup>      | No meta-analysis                        |
| Andrade, 2016 <sup>25</sup>      | No meta-analysis                        |
| Andrzejewski, 2016 <sup>26</sup> | No meta-analysis                        |
| Angarita, 2016 <sup>27</sup>     | No meta-analysis                        |
| Antonsdottir, 2015 <sup>28</sup> | No meta-analysis                        |
| Aryana, 2007 <sup>29</sup>       | No meta-analysis                        |
| Ashton, 2005 <sup>30</sup>       | No meta-analysis                        |
| Ashton, 2007 <sup>31</sup>       | No meta-analysis                        |
| Attal, 2015 <sup>32</sup>        | No meta-analysis                        |
| Badowski, 2014 <sup>33</sup>     | No meta-analysis                        |
| Badowski, 2017 <sup>34</sup>     | No meta-analysis                        |
| Bagot, 2015 <sup>35</sup>        | No meta-analysis                        |
| Bagshaw, 2002 <sup>36</sup>      | No meta-analysis                        |
| Bahji, 2016 <sup>37</sup>        | No meta-analysis                        |
| Bahji, 2021 <sup>38</sup>        | No outcome of interest                  |
| Baker, 2010 <sup>39</sup>        | No meta-analysis                        |
| Baldacchino, 2012 <sup>40</sup>  | No meta-analysis                        |
| Baldinger, 2012 <sup>41</sup>    | No meta-analysis                        |
| Bally, 2014 <sup>42</sup>        | No meta-analysis                        |

|                                      |                      |
|--------------------------------------|----------------------|
| Bao, 2014 <sup>43</sup>              | No meta-analysis     |
| Barbetta, 2017 <sup>44</sup>         | No meta-analysis     |
| Barkin, 2016 <sup>45</sup>           | No meta-analysis     |
| Barkin, 2017 <sup>46</sup>           | No meta-analysis     |
| Baron, 2015 <sup>47</sup>            | No meta-analysis     |
| Barthelemy, 2016 <sup>48</sup>       | No meta-analysis     |
| Batalla, 2013 <sup>49</sup>          | No meta-analysis     |
| Batalla, 2014 <sup>50</sup>          | No meta-analysis     |
| Batet Sanchez, 2016 <sup>51</sup>    | No meta-analysis     |
| Beaulieu, 2002 <sup>52</sup>         | No meta-analysis     |
| Beaulieu, 2007 <sup>53</sup>         | No meta-analysis     |
| Behm, 2018 <sup>54</sup>             | No meta-analysis     |
| Belbasis, 2018 <sup>55</sup>         | No meta-analysis     |
| Ben Amar, 2006 <sup>56</sup>         | No meta-analysis     |
| Ben Amar, 2007 <sup>57</sup>         | No meta-analysis     |
| Beneria, 2021 <sup>58</sup>          | No cannabis exposure |
| Benze, 2012 <sup>59</sup>            | No meta-analysis     |
| Berthet, 2016 <sup>60</sup>          | No meta-analysis     |
| Bertolin-Guillen, 2008 <sup>61</sup> | No meta-analysis     |
| Bhandari, 2016 <sup>62</sup>         | No meta-analysis     |
| Bhattacharyya, 2009 <sup>63</sup>    | No meta-analysis     |
| Bifulco, 2006 <sup>64</sup>          | No meta-analysis     |
| Birdsall, 2016 <sup>65</sup>         | No meta-analysis     |
| Blake, 2017 <sup>66</sup>            | No meta-analysis     |
| Blessing, 2015 <sup>67</sup>         | No meta-analysis     |
| Blest-Hopley, 2018 <sup>68</sup>     | Duplicated           |
| Blest-Hopley, 2018 <sup>69</sup>     | Duplicated           |
| Blumenthal, 2016 <sup>70</sup>       | No meta-analysis     |
| Bogaty, 2018 <sup>71</sup>           | Duplicated           |
| Bogaty, 2018 <sup>71</sup>           | Duplicated           |

|                                  |                     |
|----------------------------------|---------------------|
| Bonnet, 2015 <sup>72</sup>       | No meta-analysis    |
| Borgan, 2019 <sup>73</sup>       | No meta-analysis    |
| Bosnjak, 2021                    | No meta-analysis    |
| Bossong, 2014 <sup>74</sup>      | No meta-analysis    |
| Bowen, 2018 <sup>75</sup>        | No meta-analysis    |
| Boychuk, 2015 <sup>76</sup>      | No meta-analysis    |
| Brafford May, 2016 <sup>77</sup> | No meta-analysis    |
| Braum, 2017 <sup>78</sup>        | No meta-analysis    |
| Braun, 2016 <sup>79</sup>        | No meta-analysis    |
| Bravo-Soto, 2017 <sup>80</sup>   | No meta-analysis    |
| Breet, 2018 <sup>81</sup>        | No meta-analysis    |
| Brents, 2016 <sup>82</sup>       | No meta-analysis    |
| Broyd, 2016 <sup>83</sup>        | No meta-analysis    |
| Buadze, 2012 <sup>84</sup>       | No meta-analysis    |
| Budney, 2002 <sup>85</sup>       | No meta-analysis    |
| Budney, 2004 <sup>86</sup>       | No meta-analysis    |
| Bugra, 2012 <sup>87</sup>        | No English language |
| Burns, 2006 <sup>88</sup>        | No meta-analysis    |
| Burns, 2016 <sup>89</sup>        | No meta-analysis    |
| Busch, 2014 <sup>90</sup>        | No meta-analysis    |
| Butler, 2009 <sup>91</sup>       | No meta-analysis    |
| Cabeza, 2017 <sup>92</sup>       | No meta-analysis    |
| Cadet, 2014 <sup>93</sup>        | No meta-analysis    |
| Cadet, 2016 <sup>94</sup>        | No meta-analysis    |
| Cairns, 2016 <sup>95</sup>       | No meta-analysis    |
| Calabria, 2010 <sup>96</sup>     | No meta-analysis    |
| Calandre, 2015 <sup>97</sup>     | No meta-analysis    |
| Campbell, 1999 <sup>98</sup>     | No meta-analysis    |
| Campbell, 2001 <sup>99</sup>     | No meta-analysis    |
| Campillo, 2009 <sup>100</sup>    | No meta-analysis    |

|                                      |                  |
|--------------------------------------|------------------|
| Cancino Botello, 2016 <sup>101</sup> | No meta-analysis |
| Caplan, 1990 <sup>102</sup>          | No meta-analysis |
| Carrigan, 2016 <sup>103</sup>        | No meta-analysis |
| Cascini, 2012 <sup>104</sup>         | No meta-analysis |
| Castaneto, 2014 <sup>105</sup>       | No meta-analysis |
| Castle, 1996 <sup>106</sup>          | No meta-analysis |
| Chatkin, 2019 <sup>107</sup>         | No meta-analysis |
| Chisini 2019 <sup>108</sup>          | Cross-sectional  |
| Chisini, 2019 <sup>108</sup>         | Duplicated       |
| Chiurchiù, 2015 <sup>109</sup>       | No meta-analysis |
| Cinti, 2009 <sup>110</sup>           | No meta-analysis |
| Claflin, 2018 <sup>111</sup>         | No meta-analysis |
| Clark, 2005 <sup>112</sup>           | No meta-analysis |
| Cohen, 2008 <sup>113</sup>           | No meta-analysis |
| Cohen, 2018 <sup>114</sup>           | Duplicated       |
| Cohen, 2018 <sup>114</sup>           | No meta-analysis |
| Colizzi, 2018 <sup>115</sup>         | No meta-analysis |
| Collo, 2014 <sup>116</sup>           | No meta-analysis |
| Compton, 2007 <sup>117</sup>         | No meta-analysis |
| Contreras, 2017 <sup>118</sup>       | No meta-analysis |
| Contreras, 2018 <sup>119</sup>       | No meta-analysis |
| Cookey, 2014 <sup>120</sup>          | No meta-analysis |
| Cooper, 2016 <sup>121</sup>          | No meta-analysis |
| Copeland, 2016 <sup>122</sup>        | No meta-analysis |
| Correa, 2005 <sup>123</sup>          | No meta-analysis |
| Costa, 2007 <sup>124</sup>           | No meta-analysis |
| Costa, 2016 <sup>125</sup>           | No meta-analysis |
| Cottencin, 2014 <sup>126</sup>       | No meta-analysis |
| Courts, 2016 <sup>127</sup>          | No meta-analysis |
| Crean, 2011 <sup>128</sup>           | No meta-analysis |

|                                             |                           |
|---------------------------------------------|---------------------------|
| Crippa, 2009 <sup>129</sup>                 | No meta-analysis          |
| Crippa, 2012 <sup>130</sup>                 | No meta-analysis          |
| Crippa, 2015 <sup>131</sup>                 | No meta-analysis          |
| Croxford, 2003 <sup>132</sup>               | No meta-analysis          |
| Croxford, 2005 <sup>133</sup>               | No meta-analysis          |
| Cuba, 2017 <sup>134</sup>                   | No meta-analysis          |
| Curtis, 2009 <sup>135</sup>                 | No meta-analysis          |
| Darkovska-Serafimovska, 2018 <sup>136</sup> | No meta-analysis          |
| Das, 2015 <sup>137</sup>                    | No meta-analysis          |
| De Almeida Pereira, 2018 <sup>138</sup>     | No meta-analysis          |
| De Irala, 2005 <sup>139</sup>               | No meta-analysis          |
| De Tommaso, 2017 <sup>140</sup>             | No meta-analysis          |
| De Vita, 2018 <sup>141</sup>                | Duplicated                |
| Degenhardt, 2003 <sup>142</sup>             | No meta-analysis          |
| Degenhardt, 2008 <sup>143</sup>             | No meta-analysis          |
| Dekker, 2009 <sup>144</sup>                 | No meta-analysis          |
| Delisi, 2008 <sup>145</sup>                 | No meta-analysis          |
| Denier, 2012 <sup>146</sup>                 | No meta-analysis          |
| Deshpande, 2015 <sup>147</sup>              | No meta-analysis          |
| Deyniecki, 2015 <sup>148</sup>              | No meta-analysis          |
| Dimitrios, 2021 <sup>149</sup>              | No meta-analysis          |
| Di Forti, 2007 <sup>150</sup>               | No meta-analysis          |
| Doggui, 2021 <sup>151</sup>                 | Cross-sectional           |
| Dos Santos, 2015 <sup>152</sup>             | No meta-analysis          |
| Dosenovic, 2017 <sup>153</sup>              | No meta-analysis          |
| Douet, 2017 <sup>154</sup>                  | No meta-analysis          |
| Du Plessis, 2015 <sup>155</sup>             | No meta-analysis          |
| Eisentstein, 2015 <sup>156</sup>            | No meta-analysis          |
| Elliott, 2019 <sup>157</sup>                | Duplicated                |
| Esmaeelzadeh, 2018 <sup>158</sup>           | Not largest meta-analysis |

|                                     |                                         |
|-------------------------------------|-----------------------------------------|
| Elowe, 2016 <sup>159</sup>          | No meta-analysis                        |
| England, 2015 <sup>160</sup>        | Not human report                        |
| Farquhar-Smith, 2009 <sup>161</sup> | No meta-analysis                        |
| Farzaei, 2016 <sup>162</sup>        | No meta-analysis                        |
| Farzaei, 2016 <sup>163</sup>        | No meta-analysis                        |
| Farzaei, 2017 <sup>164</sup>        | No meta-analysis                        |
| Fattore, 2016 <sup>165</sup>        | No meta-analysis                        |
| Fergusson, 2015 <sup>166</sup>      | No meta-analysis                        |
| Fernandez-Ruiz, 2004 <sup>167</sup> | No meta-analysis                        |
| Fernandez-Ruiz, 2005 <sup>168</sup> | No meta-analysis                        |
| Fernandez-Ruiz, 2015 <sup>169</sup> | No meta-analysis                        |
| Ferraro, 2009 <sup>170</sup>        | No meta-analysis                        |
| Fife, 2015 <sup>171</sup>           | No meta-analysis                        |
| Fijal, 2016 <sup>172</sup>          | No meta-analysis                        |
| Filloux, 2015 <sup>173</sup>        | No meta-analysis                        |
| Fine, 2014 <sup>174</sup>           | No meta-analysis                        |
| Fisher, 2021 <sup>175</sup>         | Not largest meta-analysis               |
| Fitzcharles, 2016 <sup>176</sup>    | No meta-analysis                        |
| Fitzcharles, 2016 <sup>177</sup>    | No meta-analysis                        |
| Fitzcharles, 2016 <sup>178</sup>    | No meta-analysis                        |
| Fitzcharles, 2016 <sup>179</sup>    | No meta-analysis                        |
| Fletcher, 2022                      | No meta-analysis                        |
| Fleury, 2016 <sup>180</sup>         | No cannabis/cannabinoid related outcome |
| Fowler, 2003 <sup>181</sup>         | No meta-analysis                        |
| Freeman, 2021                       | No meta-analysis                        |
| Frisher, 2009 <sup>182</sup>        | No meta-analysis                        |
| Gaffari, 2014 <sup>183</sup>        | No meta-analysis                        |
| Gandhi, 2017 <sup>184</sup>         | No meta-analysis                        |
| Garay, 2015 <sup>185</sup>          | No meta-analysis                        |
| Garay, 2016 <sup>186</sup>          | No meta-analysis                        |



|                                  |                                          |
|----------------------------------|------------------------------------------|
| Garcia, 2015 <sup>187</sup>      | No meta-analysis                         |
| Garcia, 2016 <sup>188</sup>      | No meta-analysis                         |
| Gates, 2014 <sup>189</sup>       | No meta-analysis                         |
| Giacoppo, 2017 <sup>190</sup>    | No meta-analysis                         |
| Gloss, 2014 <sup>191</sup>       | No meta-analysis                         |
| Gobbi, 2019 <sup>192</sup>       | Not largest meta-analysis                |
| Godin, 2022 <sup>193</sup>       | No meta-analysis                         |
| Godsey, 2016 <sup>194</sup>      | No meta-analysis                         |
| Goldchluk, 2008 <sup>195</sup>   | No meta-analysis                         |
| Gomez Ochoa, 2021 <sup>196</sup> | No meta-analysis                         |
| Gonzalez, 2007 <sup>197</sup>    | No meta-analysis                         |
| Gorey, 2019 <sup>198</sup>       | No meta-analysis                         |
| Gorman, 2002 <sup>199</sup>      | Cross-sectional                          |
| Gravas, 2016 <sup>200</sup>      | No meta-analysis                         |
| Gruber, 1996 <sup>201</sup>      | No meta-analysis                         |
| Grundy, 2001 <sup>202</sup>      | No meta-analysis                         |
| Guinguis, 2017 <sup>203</sup>    | No meta-analysis                         |
| Gully, 2017 <sup>204</sup>       | No meta-analysis                         |
| Gunn, 2015 <sup>205</sup>        | No meta-analysis                         |
| Gurney, 2014 <sup>206</sup>      | No meta-analysis                         |
| Haffar, 2018 <sup>207</sup>      | No meta-analysis                         |
| Hall, 2000 <sup>208</sup>        | No meta-analysis                         |
| Hall, 2005 <sup>209</sup>        | No meta-analysis                         |
| Hall, 2006 <sup>210</sup>        | No meta-analysis                         |
| Hammond, 2021 <sup>211</sup>     | Not largest meta-analysis                |
| Harrison, 2015 <sup>212</sup>    | No cannabis/cannabinoids related outcome |
| Hasenoehrl, 2017 <sup>213</sup>  | No meta-analysis                         |
| Hashibe, 2005 <sup>214</sup>     | No meta-analysis                         |
| Hauser, 2017 <sup>215</sup>      | No meta-analysis                         |
| Hauser, 2018 <sup>216</sup>      | No meta-analysis                         |

|                                |                                          |
|--------------------------------|------------------------------------------|
| Hedlund, 2014 <sup>217</sup>   | No meta-analysis                         |
| Hendren, 2015 <sup>218</sup>   | No meta-analysis                         |
| Henquet, 2005 <sup>219</sup>   | No meta-analysis                         |
| Hill, 2015 <sup>220</sup>      | No meta-analysis                         |
| Hill, 2017 <sup>221</sup>      | No meta-analysis                         |
| Hjorthoj, 2012 <sup>222</sup>  | No cannabis/cannabinoids related outcome |
| Hobbs, 2018 <sup>223</sup>     | No meta-analysis                         |
| Hoch, 2015 <sup>224</sup>      | No meta-analysis                         |
| Hoch, 2019 <sup>225</sup>      | Duplicated                               |
| Hoch, 2019 <sup>225</sup>      | No meta-analysis                         |
| Hohmann, 2014 <sup>226</sup>   | Duplicated                               |
| Hohmann, 2014 <sup>226</sup>   | No meta-analysis                         |
| Holitzki, 2017 <sup>227</sup>  | No meta-analysis                         |
| Horwood, 2010 <sup>228</sup>   | No meta-analysis                         |
| Hosseini, 2019 <sup>229</sup>  | No meta-analysis                         |
| Hostiuc, 2018 <sup>230</sup>   | Duplicated                               |
| Houze, 2017 <sup>231</sup>     | No meta-analysis                         |
| Houze, 2018 <sup>232</sup>     | No meta-analysis                         |
| Hoyte, 2012 <sup>233</sup>     | No meta-analysis                         |
| Huemer, 2015 <sup>234</sup>    | No meta-analysis                         |
| Huizink, 2014 <sup>235</sup>   | No meta-analysis                         |
| Hummel, 2013 <sup>236</sup>    | No meta-analysis                         |
| Humphreys, 2013 <sup>237</sup> | No cannabis/cannabinoids related outcome |
| Hunt, 2018 <sup>238</sup>      | No meta-analysis                         |
| Hyman, 2009 <sup>239</sup>     | No meta-analysis                         |
| Iffland, 2017 <sup>240</sup>   | No meta-analysis                         |
| Irner, 2012 <sup>241</sup>     | No meta-analysis                         |
| Iskedjan, 2007 <sup>242</sup>  | Not largest meta-analysis                |
| Iyalomhe, 2009 <sup>243</sup>  | No meta-analysis                         |
| Izzo, 2008 <sup>244</sup>      | No meta-analysis                         |

|                                   |                           |
|-----------------------------------|---------------------------|
| Jacobson, 2019 <sup>245</sup>     | No meta-analysis          |
| Jacques, 2014 <sup>246</sup>      | No meta-analysis          |
| Jager, 2008 <sup>247</sup>        | No meta-analysis          |
| James, 2013 <sup>248</sup>        | No meta-analysis          |
| Jawahar, 2013 <sup>249</sup>      | Unclear included studies  |
| Jensen, 2015 <sup>250</sup>       | No meta-analysis          |
| Johns, 2001 <sup>251</sup>        | No meta-analysis          |
| Jonsson, 2014 <sup>252</sup>      | No meta-analysis          |
| Joshi, 2014 <sup>253</sup>        | No meta-analysis          |
| Jouanjus, 2017 <sup>254</sup>     | No meta-analysis          |
| Jung, 2016 <sup>255</sup>         | No meta-analysis          |
| Jutras-Aswad, 2009 <sup>256</sup> | No meta-analysis          |
| Kafil, 2018 <sup>257</sup>        | No meta-analysis          |
| Kafil, 2018 <sup>258</sup>        | No meta-analysis          |
| Kahan, 2014 <sup>259</sup>        | No meta-analysis          |
| Kanit, 2009 <sup>260</sup>        | No meta-analysis          |
| Karila, 2014 <sup>261</sup>       | No meta-analysis          |
| Karl, 2017 <sup>262</sup>         | No meta-analysis          |
| Katchan, 2016 <sup>263</sup>      | No meta-analysis          |
| Katona, 2015 <sup>264</sup>       | No meta-analysis          |
| Katzberg, 2015 <sup>265</sup>     | No meta-analysis          |
| Keating, 2017 <sup>266</sup>      | No meta-analysis          |
| Kedzior, 2014 <sup>267</sup>      | Not largest meta-analysis |
| Keen, 2019 <sup>268</sup>         | No meta-analysis          |
| Kennedy, 2017 <sup>269</sup>      | No meta-analysis          |
| Kerbage, 2015 <sup>270</sup>      | No meta-analysis          |
| Khan, 2017 <sup>271</sup>         | No meta-analysis          |
| Khoury, 2019 <sup>272</sup>       | No meta-analysis          |
| Kilcher, 2017 <sup>273</sup>      | No meta-analysis          |
| Kluger, 2015 <sup>274</sup>       | No meta-analysis          |

|                                     |                                          |
|-------------------------------------|------------------------------------------|
| Koek, 2016 <sup>275</sup>           | No meta-analysis                         |
| Kokona, 2017 <sup>276</sup>         | No meta-analysis                         |
| Koppel, 2014 <sup>277</sup>         | No meta-analysis                         |
| Koppel, 2015 <sup>278</sup>         | No meta-analysis                         |
| Korantzopoulos, 2007 <sup>279</sup> | No meta-analysis                         |
| Kosiba, 2019 <sup>280</sup>         | Cross-sectional                          |
| Koskinen, 2010 <sup>281</sup>       | No cannabis/cannabinoids related outcome |
| Kreitzer, 2009 <sup>282</sup>       | No meta-analysis                         |
| Krishnan, 2009 <sup>283</sup>       | No meta-analysis                         |
| Kristanc, 2016 <sup>284</sup>       | No meta-analysis                         |
| Ksir, 2016 <sup>285</sup>           | No meta-analysis                         |
| Kucerova, 2014 <sup>286</sup>       | No meta-analysis                         |
| Kuczkowski, 2004 <sup>287</sup>     | No meta-analysis                         |
| Kumar, 2016 <sup>288</sup>          | No meta-analysis                         |
| La Porta, 2014 <sup>289</sup>       | No meta-analysis                         |
| Lago, 2007 <sup>290</sup>           | No meta-analysis                         |
| Lakhan, 2009 <sup>291</sup>         | No meta-analysis                         |
| Lamy, 2015 <sup>292</sup>           | No meta-analysis                         |
| Langhorst, 2015 <sup>293</sup>      | No meta-analysis                         |
| Lanza, 2017 <sup>294</sup>          | No meta-analysis                         |
| Large, 2012 <sup>295</sup>          | No meta-analysis                         |
| Lattanzi, 2018 <sup>296</sup>       | Duplicated                               |
| Laviolette, 2006 <sup>297</sup>     | No meta-analysis                         |
| Le Bec, 2009 <sup>298</sup>         | No meta-analysis                         |
| Lee, 2011 <sup>299</sup>            | Duplicated                               |
| Lee, 2011 <sup>299</sup>            | No cannabis/cannabinoids related outcome |
| Lee, 2018 <sup>300</sup>            | No meta-analysis                         |
| Levine, 2017 <sup>301</sup>         | No meta-analysis                         |
| Li, 2012 <sup>302</sup>             | Not largest meta-analysis                |
| Lim, 2017 <sup>303</sup>            | No meta-analysis                         |

|                                    |                           |
|------------------------------------|---------------------------|
| Linszen, 2007 <sup>304</sup>       | No meta-analysis          |
| Lisowska, 2017 <sup>305</sup>      | No meta-analysis          |
| Liu, 2016 <sup>306</sup>           | No meta-analysis          |
| Lochte, 2017 <sup>307</sup>        | No meta-analysis          |
| Loeber, 1999 <sup>308</sup>        | No meta-analysis          |
| Loeberg, 2009 <sup>309</sup>       | No meta-analysis          |
| Lorenzetti, 2013 <sup>310</sup>    | No meta-analysis          |
| Lorenzetti, 2014 <sup>311</sup>    | No meta-analysis          |
| Lorenzetti, 2016 <sup>312</sup>    | No meta-analysis          |
| Lorenzetti, 2017 <sup>313</sup>    | No meta-analysis          |
| Lorenzetti, 2019 <sup>314</sup>    | Duplicated                |
| Lotsch, 2018 <sup>315</sup>        | No meta-analysis          |
| Lubman, 2015 <sup>316</sup>        | No meta-analysis          |
| Lutge, 2013 <sup>317</sup>         | No meta-analysis          |
| Lynch, 2011 <sup>318</sup>         | No meta-analysis          |
| Lynch, 2015 <sup>319</sup>         | No meta-analysis          |
| Lynch, 2016 <sup>320</sup>         | No meta-analysis          |
| Maccarrone, 2005 <sup>321</sup>    | No meta-analysis          |
| MacDonald, 2010 <sup>322</sup>     | No meta-analysis          |
| Macdonald, 2016 <sup>323</sup>     | No meta-analysis          |
| Machado-Rocha, 2008 <sup>324</sup> | Not largest meta-analysis |
| Macleod, 2004 <sup>325</sup>       | No meta-analysis          |
| Macleod, 2006 <sup>326</sup>       | No meta-analysis          |
| Malchow, 2013 <sup>327</sup>       | No meta-analysis          |
| Maldonado, 2003 <sup>328</sup>     | No meta-analysis          |
| Mammen, 2018 <sup>329</sup>        | Duplicated                |
| Mammen, 2018 <sup>330</sup>        | No meta-analysis          |
| Mandelbaum, 2017 <sup>331</sup>    | No meta-analysis          |
| Maniglio, 2015 <sup>332</sup>      | No meta-analysis          |
| Marangoni, 2016 <sup>333</sup>     | No meta-analysis          |

|                                     |                           |
|-------------------------------------|---------------------------|
| Marconi, 2016 <sup>334</sup>        | Not largest meta-analysis |
| Martinasek, 2016 <sup>335</sup>     | No meta-analysis          |
| Martinotti, 2017 <sup>336</sup>     | No meta-analysis          |
| Martin-Sanchez, 2009 <sup>337</sup> | Not largest meta-analysis |
| Martin-Santos, 2010 <sup>338</sup>  | No meta-analysis          |
| Massi, 2013 <sup>339</sup>          | No meta-analysis          |
| Mather, 2005 <sup>340</sup>         | No meta-analysis          |
| Matheson, 2014 <sup>341</sup>       | No meta-analysis          |
| Maule, 2015 <sup>342</sup>          | No meta-analysis          |
| McCartney, 2022 <sup>343</sup>      | No outcome of interest    |
| McElroy, 2015 <sup>344</sup>        | No meta-analysis          |
| McKenna, 2014 <sup>345</sup>        | No meta-analysis          |
| McLachlan, 2015 <sup>346</sup>      | No meta-analysis          |
| McLaren, 2010 <sup>347</sup>        | No meta-analysis          |
| McLoughlin, 2014 <sup>348</sup>     | No meta-analysis          |
| Mechoulam, 2002 <sup>349</sup>      | No meta-analysis          |
| Mendiguren, 2018 <sup>350</sup>     | Not human report          |
| Meng, 2017 <sup>351</sup>           | Not largest meta-analysis |
| Merlin, 2016 <sup>352</sup>         | No meta-analysis          |
| Merlob, 2017 <sup>353</sup>         | No meta-analysis          |
| Metz, 2015 <sup>354</sup>           | No meta-analysis          |
| Mhera, 2006 <sup>355</sup>          | No meta-analysis          |
| Mheta, 2016 <sup>356</sup>          | No meta-analysis          |
| Milano, 2019 <sup>357</sup>         | No meta-analysis          |
| Minozzi, 2009 <sup>358</sup>        | No meta-analysis          |
| Moore, 2007 <sup>359</sup>          | Not largest meta-analysis |
| More, 2015 <sup>360</sup>           | No meta-analysis          |
| Morena, 2014 <sup>361</sup>         | No meta-analysis          |
| Moulin, 2014 <sup>362</sup>         | No meta-analysis          |
| Mu, 2017 <sup>363</sup>             | No meta-analysis          |

|                                        |                                         |
|----------------------------------------|-----------------------------------------|
| Mucke, 2016 <sup>364</sup>             | Duplicated                              |
| Mucke, 2018 <sup>365</sup>             | Duplicated                              |
| Muller, 2013 <sup>366</sup>            | No meta-analysis                        |
| Murillo-Rodriguez, 2014 <sup>367</sup> | No meta-analysis                        |
| Myles, 2016 <sup>368</sup>             | No meta-analysis                        |
| Nader, 2018 <sup>369</sup>             | No meta-analysis                        |
| Navarri, 2022 <sup>370</sup>           | Cross-sectional                         |
| Neale, 2017 <sup>371</sup>             | No meta-analysis                        |
| Neasta, 2014 <sup>372</sup>            | No meta-analysis                        |
| Ng, 2017 <sup>373</sup>                | No meta-analysis                        |
| Niaz, 2017 <sup>374</sup>              | No meta-analysis                        |
| Nielsen, 2017 <sup>375</sup>           | Not human report                        |
| Nielsen, 2018 <sup>376</sup>           | No meta-analysis                        |
| Niesink, 2013 <sup>377</sup>           | No meta-analysis                        |
| Norton, 2017 <sup>378</sup>            | No meta-analysis                        |
| Nsuala, 2015 <sup>379</sup>            | No meta-analysis                        |
| Nucci, 2008 <sup>380</sup>             | No meta-analysis                        |
| Nugent, 2017 <sup>381</sup>            | No meta-analysis                        |
| Nunez, 2017 <sup>382</sup>             | No meta-analysis                        |
| O'Connel, 2017 <sup>383</sup>          | No meta-analysis                        |
| O'Neil, 2017 <sup>384</sup>            | No meta-analysis                        |
| O'Tuathaigh, 2014 <sup>385</sup>       | No meta-analysis                        |
| Ojo, 2018 <sup>386</sup>               | No cannabis/cannabinoid related outcome |
| Onaivi, 2009 <sup>387</sup>            | No meta-analysis                        |
| Orsolini, 2017 <sup>388</sup>          | No meta-analysis                        |
| Osazuwa-Peters, 2016 <sup>389</sup>    | No meta-analysis                        |
| Osborne, 2017 <sup>390</sup>           | No meta-analysis                        |
| Oxentine, 2017 <sup>391</sup>          | No meta-analysis                        |
| Pacheco, 2018 <sup>392</sup>           | No meta-analysis                        |
| Palleria, 2018 <sup>393</sup>          | No meta-analysis                        |

|                                       |                                         |
|---------------------------------------|-----------------------------------------|
| Pamplona, 2018 <sup>394</sup>         | Duplicated                              |
| Panza, 2015 <sup>395</sup>            | No meta-analysis                        |
| Papanti, 2013 <sup>396</sup>          | No meta-analysis                        |
| Papathansoupolos, 2008 <sup>397</sup> | No meta-analysis                        |
| Parak, 2013 <sup>398</sup>            | No meta-analysis                        |
| Park, 2004 <sup>399</sup>             | No meta-analysis                        |
| Parmar, 2016 <sup>400</sup>           | No meta-analysis                        |
| Pattij, 2008 <sup>401</sup>           | No meta-analysis                        |
| Pena, 2017 <sup>402</sup>             | No meta-analysis                        |
| Pena, 2018 <sup>403</sup>             | No meta-analysis                        |
| Pertwee, 2007 <sup>404</sup>          | No meta-analysis                        |
| Perucca, 2017 <sup>405</sup>          | No meta-analysis                        |
| Peters, 2012 <sup>406</sup>           | No meta-analysis                        |
| Phillips, 2016 <sup>407</sup>         | No cannabis/cannabinoid related outcome |
| Pidgeon, 2013 <sup>408</sup>          | No meta-analysis                        |
| Pisani, 2021 <sup>409</sup>           | No meta-analysis                        |
| Pisanti, 2009 <sup>410</sup>          | No meta-analysis                        |
| Pisanti, 2017 <sup>411</sup>          | No meta-analysis                        |
| Porsteinsson, 2017 <sup>412</sup>     | No meta-analysis                        |
| Poupon, 2015 <sup>413</sup>           | No meta-analysis                        |
| Prud'homme, 2015 <sup>414</sup>       | No meta-analysis                        |
| Pusjpa-Rajan, 2015 <sup>415</sup>     | No meta-analysis                        |
| Qin, 2020 <sup>416</sup>              | No cannabis exposure                    |
| Quickfall, 2006 <sup>417</sup>        | No meta-analysis                        |
| Qureshi, 2018 <sup>418</sup>          | No meta-analysis                        |
| Rabgay, 2020 <sup>419</sup>           | Not largest meta-analysis               |
| Rabinak, 2014 <sup>420</sup>          | No meta-analysis                        |
| Radhakrishnan, 2014 <sup>421</sup>    | No meta-analysis                        |
| Ragazzi, 2018 <sup>422</sup>          | No meta-analysis                        |
| Ragen, 2015 <sup>423</sup>            | No meta-analysis                        |



|                                      |                  |
|--------------------------------------|------------------|
| Rai, 2017 <sup>424</sup>             | No meta-analysis |
| Rai, 2017 <sup>425</sup>             | No meta-analysis |
| Ramkellawan, 2016 <sup>426</sup>     | No meta-analysis |
| Ramo, 2012 <sup>427</sup>            | No meta-analysis |
| Ramsay Wan, 2018 <sup>428</sup>      | No meta-analysis |
| Ranganathan, 2006 <sup>429</sup>     | No meta-analysis |
| Raphael, 2005 <sup>430</sup>         | No meta-analysis |
| Ravi, 2018 <sup>431</sup>            | No meta-analysis |
| Reece, 2009 <sup>432</sup>           | No meta-analysis |
| Reisfield, 2009 <sup>433</sup>       | No meta-analysis |
| Renard, 2014 <sup>434</sup>          | No meta-analysis |
| Reuter, 2016 <sup>435</sup>          | No meta-analysis |
| Ribeiro, 2016 <sup>436</sup>         | No meta-analysis |
| Ribeiro, 2016 <sup>437</sup>         | No meta-analysis |
| Richardson, 2016 <sup>438</sup>      | No meta-analysis |
| Rivera-Olmos, 2016 <sup>439</sup>    | No meta-analysis |
| Robson, 2001 <sup>440</sup>          | No meta-analysis |
| Rocco, 2018 <sup>441</sup>           | No meta-analysis |
| Rocha, 2014 <sup>442</sup>           | No meta-analysis |
| Rock, 2016 <sup>443</sup>            | No meta-analysis |
| Rodriguez, 2018 <sup>444</sup>       | Duplicated       |
| Rogeberg, 2018 <sup>445</sup>        | No meta-analysis |
| Rogeberg, 2019 <sup>446</sup>        | Duplicated       |
| Rogers, 2017 <sup>447</sup>          | No meta-analysis |
| Rohleder, 2016 <sup>448</sup>        | No meta-analysis |
| Romero-Sandoval, 2015 <sup>449</sup> | No meta-analysis |
| Romero-Sandoval, 2017 <sup>450</sup> | No meta-analysis |
| Rong, 2018 <sup>451</sup>            | No meta-analysis |
| Rosenberg, 2015 <sup>452</sup>       | No meta-analysis |
| Rothbart, 2014 <sup>453</sup>        | No meta-analysis |

|                                     |                           |
|-------------------------------------|---------------------------|
| Rothman, 2015 <sup>454</sup>        | No meta-analysis          |
| Rubino, 2015 <sup>455</sup>         | No meta-analysis          |
| Ruisch, 2018 <sup>456</sup>         | Duplicated                |
| Russel, 2018 <sup>457</sup>         | No meta-analysis          |
| Sami, 2015 <sup>458</sup>           | No meta-analysis          |
| Santana, 2015 <sup>459</sup>        | No meta-analysis          |
| Sarfaraz, 2008 <sup>460</sup>       | No meta-analysis          |
| Sarne, 2005 <sup>461</sup>          | No meta-analysis          |
| Schneider, 2008 <sup>462</sup>      | No meta-analysis          |
| Schreck, 2018 <sup>463</sup>        | No meta-analysis          |
| Schubart, 2014 <sup>464</sup>       | No meta-analysis          |
| Schussel, 2018 <sup>465</sup>       | No meta-analysis          |
| Schussel, 2018 <sup>466</sup>       | No meta-analysis          |
| Schwartz, 1997 <sup>467</sup>       | No meta-analysis          |
| Scott, 2018 <sup>468</sup>          | Duplicated                |
| Sellers, 2017 <sup>469</sup>        | No meta-analysis          |
| Semple, 2005 <sup>470</sup>         | Not largest meta-analysis |
| Serafini, 2012 <sup>471</sup>       | No meta-analysis          |
| Shahpiri, 2016 <sup>472</sup>       | No meta-analysis          |
| Sharapova, 2018 <sup>473</sup>      | No meta-analysis          |
| Sharma, 2015 <sup>474</sup>         | No meta-analysis          |
| Shorter, 2015 <sup>475</sup>        | No meta-analysis          |
| Shrivastava, 2015 <sup>476</sup>    | No meta-analysis          |
| Silva, 2015 <sup>477</sup>          | No meta-analysis          |
| Silveira, 2017 <sup>478</sup>       | Not human report          |
| Simons-Linares, 2017 <sup>479</sup> | No meta-analysis          |
| Sims, 2018 <sup>480</sup>           | No meta-analysis          |
| Skalski, 2017 <sup>481</sup>        | No meta-analysis          |
| Snedecor, 2013 <sup>482</sup>       | No meta-analysis          |
| Snedecor, 2014 <sup>483</sup>       | No meta-analysis          |

|                                     |                                         |
|-------------------------------------|-----------------------------------------|
| Soares, 2017 <sup>484</sup>         | No meta-analysis                        |
| Soler, 2013 <sup>485</sup>          | No meta-analysis                        |
| Soliman, 2021 <sup>486</sup>        | Not in humans                           |
| Solowij, 2008 <sup>487</sup>        | No meta-analysis                        |
| Spadaru, 2017                       | No meta-analysis                        |
| Stanley, 2014 <sup>488</sup>        | No meta-analysis                        |
| Steenkamp, 2017 <sup>489</sup>      | No meta-analysis                        |
| Stern, 2018 <sup>490</sup>          | No meta-analysis                        |
| Stevens, 2017 <sup>491</sup>        | No meta-analysis                        |
| Sticht, 2015 <sup>492</sup>         | No meta-analysis                        |
| Stockings, 2018 <sup>493</sup>      | Duplicated                              |
| Stout, 2014 <sup>494</sup>          | No meta-analysis                        |
| Suarez-Pinilla, 2014 <sup>495</sup> | No meta-analysis                        |
| Sznitzman, 2015 <sup>496</sup>      | No meta-analysis                        |
| Tafelski, 2016 <sup>497</sup>       | No meta-analysis                        |
| Tahamtan, 2016 <sup>498</sup>       | No meta-analysis                        |
| Tait, 2016 <sup>499</sup>           | No meta-analysis                        |
| Talamo, 2006 <sup>500</sup>         | No cannabis/cannabinoid related outcome |
| Tandon, 2017 <sup>501</sup>         | No meta-analysis                        |
| Tateo, 2017 <sup>502</sup>          | No meta-analysis                        |
| Termine, 2013 <sup>503</sup>        | No meta-analysis                        |
| Tetrault, 2007 <sup>504</sup>       | No meta-analysis                        |
| Thornicroft, 1990 <sup>505</sup>    | No meta-analysis                        |
| Tomassini, 2013 <sup>506</sup>      | No meta-analysis                        |
| Tournebize, 2015 <sup>507</sup>     | Duplicated                              |
| Tournebize, 2017 <sup>508</sup>     | No meta-analysis                        |
| Trescot, 2006 <sup>509</sup>        | No meta-analysis                        |
| Trinh, 2018 <sup>510</sup>          | No meta-analysis                        |
| Trojano, 2015 <sup>511</sup>        | No meta-analysis                        |
| Tsang, 2016 <sup>512</sup>          | No meta-analysis                        |

|                                                    |                                         |
|----------------------------------------------------|-----------------------------------------|
| Tuca, 2013 <sup>513</sup>                          | No meta-analysis                        |
| Turcotte, 2016 <sup>514</sup>                      | No meta-analysis                        |
| Turgeman, 2017 <sup>515</sup>                      | No meta-analysis                        |
| Turna, 2017 <sup>516</sup>                         | No meta-analysis                        |
| Turna, 2019 <sup>517</sup>                         | No meta-analysis                        |
| Turner, 2014 <sup>518</sup>                        | No meta-analysis                        |
| Twomey, 2017 <sup>519</sup>                        | Not largest meta-analysis               |
| Urbi, 2019 <sup>520</sup>                          | Not human report                        |
| van den Beuken-van Everdingen, 2017 <sup>521</sup> | No meta-analysis                        |
| Van den Elsen, 2014 <sup>522</sup>                 | No meta-analysis                        |
| Van der Meer, 2012 <sup>523</sup>                  | Duplicated                              |
| Van Winkel, 2014 <sup>524</sup>                    | No meta-analysis                        |
| VanderVeen, 2016 <sup>525</sup>                    | No cannabis/cannabinoid related outcome |
| Vassoler, 2014 <sup>526</sup>                      | No meta-analysis                        |
| Vaucher, 2018 <sup>527</sup>                       | Duplicated                              |
| Velasco, 2015 <sup>528</sup>                       | No meta-analysis                        |
| Velayudhan, 2014 <sup>529</sup>                    | No meta-analysis                        |
| Verdejo-Garcia, 2007 <sup>530</sup>                | No meta-analysis                        |
| Verdoux, 2004 <sup>531</sup>                       | No meta-analysis                        |
| Vermersch, 2015 <sup>532</sup>                     | No meta-analysis                        |
| Verrotti, 2016 <sup>533</sup>                      | No meta-analysis                        |
| Versteeg, 2008 <sup>534</sup>                      | No meta-analysis                        |
| Verweij, 2010 <sup>535</sup>                       | No cannabis/cannabinoid related outcome |
| Verweij, 2013 <sup>536</sup>                       | No meta-analysis                        |
| Vilain, 2013 <sup>537</sup>                        | No meta-analysis                        |
| Viteri, 2014 <sup>538</sup>                        | No meta-analysis                        |
| Volkow, 2016 <sup>539</sup>                        | No meta-analysis                        |
| Voth, 1997 <sup>540</sup>                          | No meta-analysis                        |
| Vyas, 2018 <sup>541</sup>                          | No meta-analysis                        |
| Wade, 2010 <sup>542</sup>                          | Not largest meta-analysis               |

|                                  |                           |
|----------------------------------|---------------------------|
| Walit, 2016 <sup>543</sup>       | No meta-analysis          |
| Walker, 2005 <sup>544</sup>      | No meta-analysis          |
| Walsh, 2017 <sup>545</sup>       | No meta-analysis          |
| Walter, 2004 <sup>546</sup>      | No meta-analysis          |
| Watson, 2000 <sup>547</sup>      | No meta-analysis          |
| Weier, 2017 <sup>548</sup>       | No meta-analysis          |
| Weinstein, 2017 <sup>549</sup>   | No meta-analysis          |
| Weiss, 2017 <sup>550</sup>       | No meta-analysis          |
| Welsh, 2017 <sup>551</sup>       | No meta-analysis          |
| Werneck, 2018 <sup>552</sup>     | No meta-analysis          |
| Wijayendran, 2018 <sup>553</sup> | No meta-analysis          |
| Wilkinson, 2016 <sup>554</sup>   | No meta-analysis          |
| Wilson, 2022                     | Cross-sectional           |
| Wisdon, 2011 <sup>555</sup>      | No meta-analysis          |
| Witkin, 2005 <sup>556</sup>      | No meta-analysis          |
| Wolff, 2017 <sup>557</sup>       | No meta-analysis          |
| Wong, 2017 <sup>558</sup>        | Duplicated                |
| Wrege, 2014 <sup>559</sup>       | No meta-analysis          |
| Wright, 2007 <sup>560</sup>      | No meta-analysis          |
| Yadav, 2014 <sup>561</sup>       | No meta-analysis          |
| Yadav, 2014 <sup>562</sup>       | No meta-analysis          |
| Yalcin, 2014 <sup>563</sup>      | No meta-analysis          |
| Yanes, 2018 <sup>564</sup>       | No meta-analysis          |
| Yap, 2015 <sup>565</sup>         | No meta-analysis          |
| Yarnell, 2015 <sup>566</sup>     | No meta-analysis          |
| Youssef, 2017 <sup>567</sup>     | Not largest meta-analysis |
| Yucel, 2012 <sup>568</sup>       | Duplicated                |
| Yucel, 2012 <sup>568</sup>       | Not largest meta-analysis |
| Yurcheshen, 2015 <sup>569</sup>  | No meta-analysis          |
| Zammit, 2008 <sup>570</sup>      | No meta-analysis          |

|                                  |                               |
|----------------------------------|-------------------------------|
| Zarifi, 2017 <sup>571</sup>      | No meta-analysis              |
| Zettl, 2016 <sup>572</sup>       | No meta-analysis              |
| Zhang, 2015 <sup>573</sup>       | No meta-analysis              |
| Zhang, 2018 <sup>574</sup>       | No meta-analysis              |
| Zhang, 2018 <sup>575</sup>       | No meta-analysis              |
| Zilverstand, 2018 <sup>576</sup> | No meta-analysis              |
| Zlebnik, 2016 <sup>577</sup>     | No meta-analysis              |
| Zuardi, 2008 <sup>578</sup>      | No meta-analysis              |
| Alayash, 2021 <sup>579</sup>     | Mendelian randomization study |
| Baumeister, 2021 <sup>580</sup>  | Mendelian randomization study |
| Jefsen, 2021 <sup>581</sup>      | Mendelian randomization study |
| Johnson, 2021 <sup>582</sup>     | Mendelian randomization study |
| Gage, 2017 <sup>583</sup>        | Mendelian randomization study |
| Mahedy, 2021 <sup>584</sup>      | Mendelian randomization study |
| Soler, 2019 <sup>585</sup>       | Mendelian randomization study |
| Orri, 2021 <sup>586</sup>        | Mendelian randomization study |
| Vaucher, 2017 <sup>527</sup>     | Mendelian randomization study |
| Verweij, 2018 <sup>587</sup>     | Mendelian randomization study |
| Zhao, 2021 <sup>588</sup>        | Mendelian randomization study |

**eTable 4. Finding across meta-analyses of randomized controlled trials using cannabis and cannabinoids across different populations**

| Author, year            | Population           | Cannabinoid | Outcome                                 | k  | N    | Metric | ES (95% CI)       | p               | I <sup>2</sup> /<br>tau2 | Imprecision | Inconsistency | RoB | Indirectness | Publication bias | Upgrade | GRADE | Q | eOR (95% CI)      |
|-------------------------|----------------------|-------------|-----------------------------------------|----|------|--------|-------------------|-----------------|--------------------------|-------------|---------------|-----|--------------|------------------|---------|-------|---|-------------------|
| <b>Mixed conditions</b> |                      |             |                                         |    |      |        |                   |                 |                          |             |               |     |              |                  |         |       |   |                   |
| <b>CBM</b>              |                      |             |                                         |    |      |        |                   |                 |                          |             |               |     |              |                  |         |       |   |                   |
| Aviram, 2017            | Mixed conditions (A) | CBM         | Psychological adverse events            | 27 | 2113 | RR     | 3.07 (1.79, 5.26) | <0.005          | 0.00/<br>0.00            | V           | V             | V   | V            | V                | +       | H     | L | 3.07 (1.79, 5.26) |
| Aviram, 2017            | Mixed conditions (A) | CBM         | Vision related adverse events           | 15 | 753  | RR     | 3.00 (1.79, 5.03) | <0.005          | 16.73/<br>0.16           | V           | V             | V   | V            | V                | +       | H     | L | 3.00 (1.79, 5.03) |
| Aviram, 2017            | Mixed conditions (A) | CBM         | CNS adverse events                      | 40 | 2934 | RR     | 2.84 (2.16, 3.73) | <0.005          | 0.00/<br>0.00            | V           | V             | V   | V            | V                | +       | H     | L | 2.84 (2.16, 3.73) |
| Allan, 2018             | Mixed conditions (A) | CBM         | Nausea/vomit reduction                  | 7  | 663  | RR     | 3.29 (2.03, 5.30) | <0.005          | 40.35/<br>0.16           | V           | V             | ↓   | V            | V                | +       | M     | H | 0.30 (0.19, 0.49) |
| Amato, 2017             | Mixed conditions (A) | CBM         | Application site discomfort             | 3  | 347  | RR     | 1.15 (0.68, 1.96) | >0.05           | 0.00/<br>NA              | V           | V             | ↓↓  | V            | V                | x       | M     | H | 1.15 (0.68, 1.96) |
| Aviram, 2017            | Mixed conditions (A) | CBM         | Cardiac adverse events                  | 10 | 845  | RR     | 1.50 (0.77, 2.93) | >0.05           | 0.00/<br>NA              | V           | V             | ↓↓  | V            | V                | x       | M     | L | 1.50 (0.77, 2.93) |
| Amato, 2017             | Mixed conditions (A) | CBM         | Feeling high                            | 8  | 442  | RR     | 2.82 (1.15, 6.94) | 0.01<p<<br>0.05 | 54.75/<br>0.66           | V           | V             | ↓↓  | V            | V                | x       | M     | H | 2.82 (1.15, 6.94) |
| Aviram, 2017            | Mixed conditions (A) | CBM         | Gastrointestinal adverse events         | 42 | 3299 | RR     | 1.87 (1.44, 2.43) | <0.005          | 0.00/<br>0.00            | V           | V             | V   | ↓            | V                | x       | M     | L | 1.87 (1.44, 2.43) |
| Amato, 2017             | Mixed conditions (A) | CBM         | Gastrointestinal disorder (non-serious) | 10 | 1909 | RR     | 1.34 (1.02, 1.76) | 0.01<p<<br>0.05 | 0.00/<br>0.00            | V           | V             | ↓↓  | V            | V                | x       | M     | H | 1.34 (1.02, 1.76) |
| Amato, 2017             | Mixed conditions (A) | CBM         | General psychiatric disorder            | 3  | 764  | RR     | 3.00 (1.60, 5.64) | <0.005          | 1.38/<br>0.01            | V           | V             | ↓↓  | V            | V                | x       | M     | H | 3.00 (1.60, 5.64) |
| Amato, 2017             | Mixed conditions (A) | CBM         | Headache                                | 10 | 1776 | RR     | 0.97 (0.71, 1.34) | >0.05           | 0.00/<br>NA              | V           | V             | ↓↓  | V            | V                | x       | M     | H | 0.97 (0.71, 1.34) |

| Author, year | Population           | Cannabinoid | Outcome                                                    | k  | N    | Metric | ES (95% CI)          | p            | I <sup>2</sup> /<br>tau <sup>2</sup> | Imprecision | Inconsistency | RoB | Indirectness | Publication bias | Upgrade | GRADE | Q | eOR (95% CI)      |
|--------------|----------------------|-------------|------------------------------------------------------------|----|------|--------|----------------------|--------------|--------------------------------------|-------------|---------------|-----|--------------|------------------|---------|-------|---|-------------------|
| Amato, 2017  | Mixed conditions (A) | CBM         | Musculoskeletal and connective disorder                    | 4  | 1103 | RR     | 1.19 (0.81, 1.74)    | >0.05        | 0.00/<br>NA                          | V           | V             | ↓↓  | V            | V                | x       | M     | H | 1.19 (0.81, 1.74) |
| Aviram, 2017 | Mixed conditions (A) | CBM         | Musculoskeletal adverse events                             | 10 | 561  | d      | 0.35 (-0.04, 0.73)   | >0.05        | 0.00/<br>NA                          | V           | V             | ↓↓  | V            | V                | x       | M     | L | 1.88 (0.94, 3.78) |
| Aviram, 2017 | Mixed conditions (A) | CBM         | Pain reduction                                             | 41 | 2559 | d      | -0.40 (-0.58, -0.21) | <0.005       | 77.84/<br>0.25                       | V           | ↓             | V   | ↓            | V                | x       | M     | L | 0.48 (0.35, 0.68) |
| Allan, 2018  | Mixed conditions (A) | CBM         | Pain reduction, response (30% reduction)                   | 15 | 2674 | RR     | 1.30 (1.11, 1.54)    | 0.005<p<0.01 | 29.53/<br>0.03                       | V           | V             | ↓   | V            | ↓                | x       | M     | H | 0.77 (0.65, 0.91) |
| Amato, 2017  | Mixed conditions (A) | CBM         | Pain, pain intensity                                       | 2  | 142  | d      | -0.62 (-1.00, -0.24) | <0.005       | 19.04/<br>0.01                       | ↓           | V             | ↓   | V            | V                | x       | M     | H | 0.32 (0.16, 0.65) |
| Amato, 2017  | Mixed conditions (A) | CBM         | Quality of sleep                                           | 2  | 676  | MD     | 0.40 (-0.30, 1.09)   | >0.05        | 0.78/<br>NA                          | V           | V             | ↓↓  | V            | V                | x       | M     | H | NA                |
| Amato, 2017  | Mixed conditions (A) | CBM         | Renal urinary disorder                                     | 7  | 1779 | RR     | 1.15 (0.72, 1.84)    | >0.05        | 0.28/<br>NA                          | V           | V             | ↓↓  | V            | V                | x       | M     | H | 1.15 (0.72, 1.84) |
| Amato, 2017  | Mixed conditions (A) | CBM         | Respiratory disorder                                       | 3  | 493  | RR     | 0.84 (0.45, 1.57)    | >0.05        | 0.00/<br>NA                          | V           | V             | ↓↓  | V            | V                | x       | M     | H | 0.84 (0.45, 1.57) |
| Allan, 2018  | Mixed conditions (A) | CBM         | Spasticity reduction, positive global impression of change | 4  | 1066 | RR     | 1.48 (1.04, 2.11)    | 0.01<p<0.05  | 72.78/<br>0.09                       | V           | V             | ↓   | V            | ↓                | x       | M     | H | 0.67 (0.47, 0.96) |
| Amato, 2017  | Mixed conditions (A) | CBM         | Spasticity reduction                                       | 5  | 1216 | MD     | -0.10 (-0.27, 0.07)  | >0.05        | 0.00/<br>NA                          | V           | V             | ↓↓  | V            | V                | x       | M     | H | NA                |
| Amato, 2017  | Mixed conditions (A) | CBM         | Weakness                                                   | 4  | 804  | RR     | 1.30 (0.96, 1.75)    | >0.05        | 0.00/<br>NA                          | V           | V             | ↓↓  | V            | V                | x       | M     | H | 1.30 (0.96, 1.75) |
| Amato, 2017  | Mixed conditions (A) | CBM         | Acceptability                                              | 3  | 176  | RR     | 0.29 (0.06, 1.38)    | >0.05        | 0.00/<br>NA                          | ↓           | V             | ↓↓  | V            | V                | x       | L     | H | 0.29 (0.06, 1.38) |



| Author, year     | Population            | Cannabinoid       | Outcome                             | k  | N    | Metric | ES (95% CI)        | p           | I <sup>2</sup> /<br>tau <sup>2</sup> | Imprecision | Inconsistency | RoB | Indirectness | Publication bias | Upgrade | GRADE | Q | eOR (95% CI)       |
|------------------|-----------------------|-------------------|-------------------------------------|----|------|--------|--------------------|-------------|--------------------------------------|-------------|---------------|-----|--------------|------------------|---------|-------|---|--------------------|
| Velayudan, 2021  | Mixed conditions(A)   | THC               | All withdrawals, thc:cbd studies    | 26 | 2850 | IRR    | 1.40 (1.08, 1.80)  | 0.01<p<0.05 | 32.40/<br>NA                         | V           | V             | ↓↓  | V            | ↓                | x       | L     | L | 1.40 (1.08, 1.80)  |
| Velayudan, 2021  | Mixed conditions(A)   | THC, Cannabinoids | All-cause AE, thc studies           | 30 | 2627 | IRR    | 1.42 (1.12, 1.79)  | 0.01<p<0.05 | 86.50/<br>NA                         | V           | ↓             | ↓↓  | V            | ↓                | x       | L     | L | 1.42 (1.12, 1.79)  |
| Whiting, 2015    | Mixed conditions (NR) | CBM               | Anxiety                             | 12 | 1242 | OR     | 1.98 (0.73, 5.35)  | >0.05       | 54.00/<br>NA                         | V           | V             | ↓↓  | V            | ↓                | x       | L     | H | 1.98 (0.73, 5.35)  |
| Whiting, 2015    | Mixed conditions (NR) | CBM               | Any adverse event                   | 29 | 3458 | OR     | 3.03 (2.42, 3.79)  | <0.005      | 30.98/<br>0.10                       | V           | V             | ↓↓  | ↓            | V                | x       | L     | H | 3.03 (2.42, 3.79)  |
| Whiting, 2015    | Mixed conditions (NR) | CBM               | Asthenia                            | 15 | 1717 | OR     | 2.03 (1.35, 3.06)  | 0.01<p<0.05 | 0.00/<br>NA                          | V           | V             | ↓↓  | V            | ↓                | x       | L     | H | 2.03 (1.35, 3.06)  |
| Whiting, 2015    | Mixed conditions (NR) | CBM               | Balance                             | 6  | 920  | OR     | 2.62 (1.12, 6.13)  | 0.01<p<0.05 | 0.00/<br>NA                          | V           | V             | ↓↓  | V            | ↓                | x       | L     | H | 2.62 (1.12, 6.13)  |
| Whiting, 2015    | Mixed conditions (NR) | CBM               | Blood and lymphatic system disorder | 3  | 543  | OR     | 1.42 (0.20, 10.25) | >0.05       | 18.00/<br>NA                         | V           | V             | ↓↓  | V            | ↓                | x       | L     | H | 1.42 (0.20, 10.25) |
| Whiting, 2015    | Mixed conditions (NR) | CBM               | Cardiac disorders                   | 7  | 833  | OR     | 1.42 (0.58, 3.48)  | >0.05       | 0.00/<br>NA                          | V           | V             | ↓↓  | V            | ↓                | x       | L     | H | 1.42 (0.58, 3.48)  |
| Whiting, 2015    | Mixed conditions (NR) | CBM               | Confusion                           | 13 | 1160 | OR     | 4.03 (2.05, 7.97)  | 0.01<p<0.05 | 0.00/<br>NA                          | V           | V             | ↓↓  | V            | ↓                | x       | L     | H | 4.03 (2.05, 7.97)  |
| Whiting, 2015    | Mixed conditions (NR) | CBM               | Death                               | 5  | 929  | OR     | 1.01 (0.51, 2.00)  | >0.05       | 0.00/<br>NA                          | V           | V             | ↓↓  | V            | ↓                | x       | L     | H | 1.01 (0.51, 2.00)  |
| Velayudhan, 2021 | Mixed conditions(A)   | THC               | Death                               | 30 | 2627 | IRR    | 1.09 (0.75, 1.59)  | >0.05       | 0.00/<br>NA                          | V           | V             | ↓↓  | V            | ↓                | x       | L     | L | 1.09 (0.75, 1.59)  |
| Whiting, 2015    | Mixed conditions (NR) | CBM               | Depression                          | 15 | 2353 | OR     | 1.32 (0.87, 2.01)  | >0.05       | 0.00/<br>NA                          | V           | V             | ↓↓  | V            | ↓                | x       | L     | H | 1.32 (0.87, 2.01)  |
| Amato, 2017      | Mixed conditions (A)  | CBM               | Dissociation                        | 2  | 499  | RR     | 3.34(0.89, 12.42)  | >0.05       | 21.49/<br>0.36                       | ↓           | V             | ↓↓  | V            | V                | x       | L     | H | 3.34(0.89, 12.42)  |

| Author, year  | Population            | Cannabinoid | Outcome                                                            | k  | N    | Metric | ES (95% CI)        | p            | I <sup>2</sup> /<br>tau <sup>2</sup> | Imprecision | Inconsistency | RoB | Indirectness | Publication bias | Upgrade | GRADE | Q | eOR (95% CI)       |
|---------------|-----------------------|-------------|--------------------------------------------------------------------|----|------|--------|--------------------|--------------|--------------------------------------|-------------|---------------|-----|--------------|------------------|---------|-------|---|--------------------|
| Amato, 2017   | Mixed conditions (A)  | CBM         | Disturbance in attention                                           | 4  | 754  | RR     | 6.72 (1.78, 25.34) | 0.005<p<0.01 | 1.50/<br>0.03                        | ↓           | V             | ↓↓↓ | V            | V                | x       | L     | H | 6.72 (1.78, 25.34) |
| Whiting, 2015 | Mixed conditions (NR) | CBM         | Diarrhoea                                                          | 17 | 2077 | OR     | 1.65 (1.04, 2.62)  | 0.01<p<0.05  | 15.00/<br>NA                         | V           | V             | ↓↓↓ | V            | ↓                | x       | L     | H | 1.65 (1.04, 2.62)  |
| Whiting, 2015 | Mixed conditions (NR) | CBM         | Disorientation                                                     | 12 | 1736 | OR     | 5.41 (2.61, 11.19) | 0.01<p<0.05  | 0.00/<br>NA                          | V           | V             | ↓↓↓ | V            | ↓                | x       | L     | H | 5.41 (2.61, 11.19) |
| Whiting, 2015 | Mixed conditions (NR) | CBM         | Dizziness                                                          | 41 | 4243 | OR     | 5.09 (4.10, 6.32)  | 0.01<p<0.05  | 18.00/<br>NA                         | V           | V             | ↓↓↓ | V            | ↓                | x       | L     | H | 5.09 (4.10, 6.32)  |
| Whiting, 2015 | Mixed conditions (NR) | CBM         | Drowsiness                                                         | 18 | 1272 | OR     | 3.68 (2.24, 6.01)  | 0.01<p<0.05  | 44.00/<br>NA                         | V           | V             | ↓↓↓ | V            | ↓                | x       | L     | H | 3.68 (2.24, 6.01)  |
| Whiting, 2015 | Mixed conditions (NR) | CBM         | Dry mouth                                                          | 36 | 4181 | OR     | 3.50 (2.58, 4.75)  | 0.01<p<0.05  | 28.00/<br>NA                         | V           | V             | ↓↓↓ | V            | ↓                | x       | L     | H | 3.50 (2.58, 4.75)  |
| Amato, 2017   | Mixed conditions (A)  | CBM         | Dysgeusia                                                          | 3  | 774  | RR     | 5.11 (1.75, 14.93) | <0.005       | 3.88/<br>0.04                        | V           | V             | ↓↓↓ | ↓            | V                | x       | L     | H | 5.11 (1.75, 14.93) |
| Whiting, 2015 | Mixed conditions (NR) | CBM         | Dyspnoea                                                           | 4  | 375  | OR     | 0.83 (0.26, 2.63)  | >0.05        | 0.00/<br>NA                          | V           | V             | ↓↓↓ | V            | ↓                | x       | L     | H | 0.83 (0.26, 2.63)  |
| Whiting, 2015 | Mixed conditions (NR) | CBM         | Ear labyrinth disorders                                            | 3  | 922  | OR     | 2.72 (1.55, 4.75)  | 0.01<p<0.05  | 0.00/<br>NA                          | V           | V             | ↓↓↓ | V            | ↓                | x       | L     | H | 2.72 (1.55, 4.75)  |
| Whiting, 2015 | Mixed conditions (NR) | CBM         | Euphoria                                                           | 27 | 2420 | OR     | 4.08 (2.18, 7.64)  | 0.01<p<0.05  | 49.00/<br>NA                         | V           | V             | ↓↓↓ | V            | ↓                | x       | L     | H | 4.08 (2.18, 7.64)  |
| Whiting, 2015 | Mixed conditions (NR) | CBM         | Fatigue                                                            | 20 | 2717 | OR     | 2.00 (1.54, 2.62)  | 0.01<p<0.05  | 0.00/<br>NA                          | V           | V             | ↓↓↓ | V            | ↓                | x       | L     | H | 2.00 (1.54, 2.62)  |
| Whiting, 2015 | Mixed conditions (NR) | CBM         | General disorders and administration-site conditions (non-serious) | 6  | 1280 | OR     | 1.78 (1.34, 2.36)  | 0.01<p<0.05  | 0.00/<br>NA                          | V           | V             | ↓↓↓ | V            | ↓                | x       | L     | H | 1.78 (1.34, 2.36)  |

| Author, year   | Population            | Cannabinoid  | Outcome                                           | k  | N    | Metric | ES (95% CI)       | p           | I <sup>2</sup> /<br>tau <sup>2</sup> | Imprecision | Inconsistency | RoB | Indirectness | Publication bias | Upgrade | GRADE | Q | eOR (95% CI)       |
|----------------|-----------------------|--------------|---------------------------------------------------|----|------|--------|-------------------|-------------|--------------------------------------|-------------|---------------|-----|--------------|------------------|---------|-------|---|--------------------|
| Whiting, 2015  | Mixed conditions (NR) | CBM          | Hallucination                                     | 10 | 898  | OR     | 2.19 (1.02, 4.68) | 0.01<p<0.05 | 0.00/<br>NA                          | V           | V             | ↓↓  | V            | ↓                | x       | L     | H | 2.19 (1.02, 4.68)  |
| Watanabe, 2021 | Mixed conditions (NR) | CBM          | Hypotension                                       | 9  | 656  | RR     | 3.18 (1.05, 9.56) | 0.01<p<0.05 | 35.50/<br>0.06                       | V           | V             | ↓↓  | ↓↓           | V                | x       | L     | L | 3.18 (1.05, 9.56)  |
| Aviram, 2017   | Mixed conditions (A)  | CBM          | Hearing related adverse events                    | 9  | 386  | RR     | 3.53 (1.58, 7.89) | <0.005      | 12.34/<br>0.18                       | ↓           | V             | V   | ↓            | ↓                | x       | L     | L | 3.53 (1.58, 7.89)  |
| Amato, 2017    | Mixed conditions (A)  | CBM          | Mouth ulceration                                  | 3  | 347  | RR     | 2.00 (0.42, 9.51) | >0.05       | 0.00/<br>NA                          | ↓           | V             | ↓↓  | V            | V                | x       | L     | H | 2.00 (0.42, 9.51)  |
| Whiting, 2015  | Mixed conditions (NR) | CBM          | Infections and infestations                       | 7  | 1681 | OR     | 1.13 (0.87, 1.46) | >0.05       | 0.00/<br>NA                          | V           | V             | ↓↓  | V            | ↓                | x       | L     | H | 1.13 (0.87, 1.46)  |
| Whiting, 2015  | Mixed conditions (NR) | CBM          | Injury, poisoning and procedural complications    | 3  | 543  | OR     | 1.18 (0.48, 2.93) | >0.05       | 0.00/<br>NA                          | V           | V             | ↓↓  | V            | ↓                | x       | L     | H | 1.18 (0.48, 2.93)  |
| Whiting, 2015  | Mixed conditions (NR) | CBM          | Investigations                                    | 2  | 427  | OR     | 1.55 (0.36, 6.71) | >0.05       | 0.00/<br>NA                          | V           | V             | ↓↓  | V            | ↓                | x       | L     | H | 1.55 (0.36, 6.71)  |
| Whiting, 2015  | Mixed conditions (NR) | CBM          | Mental status change                              | 3  | 106  | OR     | 2.49 (0.49,12.64) | >0.05       | 0.00/<br>NA                          | ↓           | V             | ↓↓  | V            | ↓                | x       | L     | H | 2.49 (0.49, 12.64) |
| Whiting, 2015  | Mixed conditions (NR) | CBM          | Metabolism and nutrition disorders (non-serious)  | 2  | 427  | OR     | 2.37 (1.00, 5.61) | 0.01<p<0.05 | 0.00/<br>NA                          | V           | V             | ↓↓  | V            | ↓                | x       | L     | H | 2.37 (1.00, 5.61)  |
| Whiting, 2015  | Mixed conditions (NR) | CBM          | Musculoskeletal, connective tissue, bone disorder | 7  | 1310 | OR     | 1.32 (0.75, 2.32) | >0.05       | 34.00/<br>NA                         | V           | V             | ↓↓  | V            | ↓                | x       | L     | H | 1.32 (0.75, 2.32)  |
| Amato, 2017    | Mixed conditions (A)  | CBM          | Nausea                                            | 11 | 1926 | RR     | 1.96 (1.49, 2.58) | <0.005      | 0.00/<br>0.00                        | V           | V             | ↓↓  | V            | ↓                | x       | L     | H | 1.96 (1.49, 2.58)  |
| Whiting, 2015  | Mixed conditions (NR) | CBM, THC/CBD | Nausea                                            | 30 | 3579 | OR     | 2.08 (1.63, 2.65) | 0.01<p<0.05 | 0.00/<br>0.00                        | V           | V             | ↓↓  | V            | ↓                | x       | L     | H | 0.48 (0.38, 0.61)  |

| Author, year  | Population            | Cannabinoid     | Outcome                                       | k  | N    | Metric | ES (95% CI)         | p            | I <sup>2</sup> /<br>tau <sup>2</sup> | Imprecision | Inconsistency | RoB | Indirectness | Publication bias | Upgrade | GRADE | Q | eOR (95% CI)      |
|---------------|-----------------------|-----------------|-----------------------------------------------|----|------|--------|---------------------|--------------|--------------------------------------|-------------|---------------|-----|--------------|------------------|---------|-------|---|-------------------|
| Amato, 2017   | Mixed conditions (A)  | CBM             | Nausea, absence                               | 3  | 313  | RR     | 2.73 (0.90, 8.27)   | >0.05        | 88.95/<br>0.84                       | V           | ↓             | ↓↓↓ | ↓            | V                | x       | L     | H | 0.37 (0.12, 1.11) |
| Allan, 2018   | Mixed conditions (A)  | CBM             | Nausea/ vomiting reduction, response          | 14 | 1260 | RR     | 1.73 (1.17, 2.55)   | 0.005<p<0.01 | 70.82/<br>0.22                       | V           | V             | ↓   | ↓            | ↓                | x       | L     | H | 0.58 (0.39, 0.85) |
| Amato, 2017   | Mixed conditions (A)  | CBM             | Nausea/vomit absence                          | 2  | 176  | RR     | 3.68 (0.11, 22.40)  | >0.05        | 0.84/<br>NA                          | ↓           | V             | ↓↓↓ | V            | V                | x       | L     | H | 0.27 (0.02, 3.88) |
| Whiting, 2015 | Mixed conditions (NR) | CBM, THC/CBD    | Nausea/vomit complete                         | 3  | 102  | OR     | 2.84 (1.12, 7.22)   | 0.01<p<0.05  | 18.70/<br>0.14                       | ↓           | V             | ↓↓↓ | ↓            | V                | x       | L     | H | 0.35 (0.14, 0.89) |
| Whiting, 2015 | Mixed conditions (NR) | CBM             | Neoplasms, benign, malignant, and unspecified | 2  | 427  | OR     | 0.99 (0.47, 2.08)   | >0.05        | 0.00/<br>NA                          | V           | V             | ↓↓↓ | V            | ↓                | x       | L     | H | 0.99 (0.47, 2.08) |
| Whiting, 2015 | Mixed conditions (NR) | CBM             | Nervous system disorder (non-serious)         | 10 | 1521 | OR     | 3.17 (2.20, 4.58)   | 0.01<p<0.05  | 46.00/<br>NA                         | V           | V             | ↓↓↓ | V            | ↓                | x       | L     | H | 3.17 (2.20, 4.58) |
| Whiting, 2015 | Mixed conditions (NR) | Nabiximols, THC | Pain reduction                                | 8  | 1370 | OR     | 1.41 (0.99, 2.00)   | >0.05        | 47.60/<br>NA                         | V           | V             | ↓↓↓ | V            | ↓                | x       | L     | H | 0.71 (0.50, 1.01) |
| Amato, 2017   | Mixed conditions (A)  | CBM             | Pain, minimum score                           | 2  | 78   | d      | -0.36 (-0.80, 0.09) | >0.05        | 0.00/<br>NA                          | ↓↓↓         | V             | ↓↓↓ | V            | V                | x       | L     | H | NA                |
| Whiting, 2015 | Mixed conditions (NR) | CBM             | Paranoia                                      | 4  | 492  | OR     | 2.05(0.42, 10.10)   | >0.05        | 0.00/<br>NA                          | V           | V             | ↓↓↓ | V            | ↓                | x       | L     | H | 2.05(0.42, 10.10) |
| Whiting, 2015 | Mixed conditions (NR) | CBM             | Psychiatric disorders (non-serious)           | 8  | 1672 | OR     | 3.10 (1.81, 5.29)   | 0.01<p<0.05  | 55.00/<br>NA                         | V           | V             | ↓↓↓ | V            | ↓                | x       | L     | H | 3.10 (1.81, 5.29) |
| Whiting, 2015 | Mixed conditions (NR) | CBM             | Renal and urinary disorder (non-serious)      | 3  | 470  | OR     | 2.45 (2.27, 2.65)   | 0.01<p<0.05  | 0.00/<br>NA                          | V           | V             | ↓↓↓ | V            | ↓                | x       | L     | H | 2.45 (2.27, 2.65) |
| Whiting, 2015 | Mixed conditions (NR) | CBM             | Respiratory, thoracic, mediastinal disorder   | 5  | 851  | OR     | 0.80 (0.46, 1.39)   | >0.05        | 0.00/<br>NA                          | V           | V             | ↓↓↓ | V            | ↓                | x       | L     | H | 0.80 (0.46, 1.39) |

| Author, year     | Population            | Cannabinoid                    | Outcome                               | k  | N    | Metric | ES (95% CI)        | p           | I <sup>2</sup> /<br>tau <sup>2</sup> | Imprecision | Inconsistency | RoB | Indirectness | Publication bias | Upgrade | GRADE | Q | eOR (95% CI)      |
|------------------|-----------------------|--------------------------------|---------------------------------------|----|------|--------|--------------------|-------------|--------------------------------------|-------------|---------------|-----|--------------|------------------|---------|-------|---|-------------------|
| Whiting, 2015    | Mixed conditions (NR) | CBM                            | Serious adverse events                | 34 | 3248 | OR     | 1.41 (1.04, 1.92)  | 0.01<p<0.05 | 0.00/<br>NA                          | V           | V             | ↓↓↓ | V            | ↓                | x       | L     | H | 1.41 (1.04, 1.92) |
| Velayudhan, 2021 | Mixed conditions(A)   | THC                            | Serious adverse events                | 27 | 2082 | IRR    | 1.08 (0.80, 1.46)  | >0.05       | 0.00/<br>NA                          | V           | V             | ↓↓↓ | V            | ↓                | x       | L     | L | 1.08 (0.80, 1.46) |
| Whiting, 2015    | Mixed conditions (NR) | CBM                            | Skin and subcutaneous tissue          | 3  | 405  | OR     | 0.85 (0.34, 2.13)  | >0.05       | 0.00/<br>NA                          | V           | V             | ↓↓↓ | V            | ↓                | x       | L     | H | 0.85 (0.34, 2.13) |
| Whiting, 2015    | Mixed conditions (NR) | CBM                            | Somnolence                            | 26 | 3168 | OR     | 2.83 (2.05, 3.91)  | 0.01<p<0.05 | 27.00/<br>NA                         | V           | V             | ↓↓↓ | V            | ↓                | x       | L     | H | 2.83 (2.05, 3.91) |
| Whiting, 2015    | Mixed conditions (NR) | Nabiximols, dronabinol THC/CBD | Spasticity reduction                  | 6  | 1134 | MD     | -0.12(-0.24,0.01)  | >0.05       | 0.00/<br>NA                          | V           | V             | ↓↓↓ | ↓            | ↓                | x       | L     | H | NA                |
| Velayudhan, 2021 | Mixed conditions(A)   | THC                            | Tolerability                          | 27 | 3330 | IRR    | 1.18 (0.89, 1.57)  | >0.05       | 0.00/<br>NA                          | V           | V             | ↓↓↓ | V            | ↓                | x       | L     | L | 1.18 (0.89, 1.57) |
| Velayudan, 2021  | Mixed conditions(A)   | THC                            | Treatment related AE, thc:cbd studies | 9  | 1113 | IRR    | 1.70 (1.24, 2.33)  | 0.01<p<0.05 | 85.20/<br>NA                         | V           | ↓             | ↓↓↓ | V            | ↓                | x       | L     | L | 1.70 (1.24, 2.33) |
| Velayudan, 2021  | Mixed conditions(A)   | THC, Cannabinoids              | Treatment related AE, thc studies     | 9  | 391  | IRR    | 1.60 (1.26, 2.04)  | 0.01<p<0.05 | 0.00/<br>NA                          | V           | V             | ↓↓↓ | V            | ↓                | x       | L     | L | 1.60 (1.26, 2.04) |
| Whiting, 2015    | Mixed conditions (NR) | CBM                            | Vomiting                              | 17 | 2191 | OR     | 1.67 (1.13, 2.47)  | 0.01<p<0.05 | 0.00/<br>NA                          | V           | V             | ↓↓↓ | V            | ↓                | x       | L     | H | 1.67 (1.13, 2.47) |
| Amato, 2017      | Mixed conditions (A)  | CBM                            | Vomiting absence                      | 3  | 140  | RR     | 1.85 (0.14, 24.19) | >0.05       | 0.71/<br>NA                          | ↓           | V             | ↓↓↓ | V            | V                | x       | L     | H | 0.54 (0.04, 7.10) |
| Amato, 2017      | Mixed conditions (A)  | CBM                            | Vertigo                               | 4  | 957  | RR     | 3.35 (1.44, 7.77)  | <0.005      | 32.64/<br>0.23                       | ↓           | V             | ↓↓↓ | V            | V                | x       | L     | H | 3.35 (1.44, 7.77) |
| Amato, 2017      | Mixed conditions (A)  | CBM                            | Vision blurred                        | 4  | 1063 | RR     | 2.29 (0.70, 7.43)  | >0.05       | 30.91/<br>0.49                       | ↓           | V             | ↓↓↓ | V            | V                | x       | L     | H | 2.29 (0.70, 7.43) |
| Whiting, 2015    | Mixed conditions (NR) | CBM                            | Withdrawal due to adverse events      | 23 | 2755 | OR     | 2.94 (2.18, 3.96)  | 0.01<p<0.05 | 2.00/<br>NA                          | V           | V             | ↓↓↓ | V            | ↓                | x       | L     | H | 2.94 (2.18, 3.96) |

| Author, year    | Population              | Cannabinoid     | Outcome                       | k  | N    | Metric | ES (95% CI)         | p           | I <sup>2</sup> /<br>tau <sup>2</sup> | Imprecision | Inconsistency | RoB | Indirectness | Publication bias | Upgrade | GRADE | Q | eOR (95% CI)       |
|-----------------|-------------------------|-----------------|-------------------------------|----|------|--------|---------------------|-------------|--------------------------------------|-------------|---------------|-----|--------------|------------------|---------|-------|---|--------------------|
|                 |                         |                 |                               |    |      |        |                     |             | NA                                   |             |               |     |              |                  |         |       |   |                    |
| Velayudan, 2021 | Mixed conditions(A)     | THC             | All-cause AE, thc:cbd studies | 16 | 2254 | IRR    | 1.58 (1.26, 1.98)   | 0.01<p<0.05 | 92.20/NA                             | V           | ↓↓            | ↓↓  | V            | ↓                | x       | VL    | L | 1.58 (1.26, 1.98)  |
| Wang, 2008      | Mixed conditions (A)    | Cannabis        | Non serious adverse events    | 26 | 4198 | RR     | 1.86 (1.56, 2.21)   | <0.005      | 86.66/0.14                           | V           | ↓             | ↓↓  | ↓↓           | V                | x       | VL    | L | 1.86 (1.56, 2.21)  |
| Watanabe, 2021  | Mixed conditions (NR)   | CBM             | Orthostatic hypotension       | 10 | 384  | RR     | 3.27 (1.85, 5.78)   | <0.005      | 6.94/0.06                            | V           | V             | ↓↓  | ↓↓           | ↓                | x       | VL    | L | 3.27 (1.85, 5.78)  |
| Whiting, 2015   | Mixed conditions (NR)   | CBM             | Psychosis                     | 2  | 37   | OR     | 1.09(0.07, 16.35)   | >0.05       | 25.00/NA                             | ↓↓          | V             | ↓↓  | V            | ↓                | x       | VL    | H | 1.09(0.07, 16.35)  |
| Whiting, 2015   | Mixed conditions (NR)   | CBM             | Seizures                      | 2  | 42   | OR     | 0.91(0.05, 15.66)   | >0.05       | 0.00/NA                              | ↓↓          | V             | ↓↓  | V            | ↓                | x       | VL    | H | 0.91(0.05, 15.66)  |
| Whiting, 2015   | Mixed conditions (NR)   | Nabiximols, THC | Sleep disturbances            | 3  | 602  | MD     | -0.23 (-0.60, 0.14) | >0.05       | 79.51/0.06                           | V           | ↓             | ↓↓  | ↓            | ↓                | x       | VL    | H | NA                 |
| Whiting, 2015   | Mixed conditions (NR)   | Nabiximols, THC | Sleep quality                 | 8  | 1415 | MD     | -0.28 (-1.88, 1.31) | >0.05       | 96.18/3.91                           | V           | ↓↓            | ↓↓  | ↓            | V                | x       | VL    | H | NA                 |
| Watanabe, 2021  | Mixed conditions (NR)   | CBM             | Syncope                       | 3  | 128  | RR     | 1.18 (0.25, 5.59)   | >0.05       | 0.00/NA                              | ↓           | V             | ↓↓  | ↓↓           | ↓                | x       | VL    | L | 1.18 (0.25, 5.59)  |
| Watanabe, 2021  | Mixed conditions (NR)   | CBM             | Tachycardia                   | 12 | 492  | RR     | 1.94 (0.81, 4.64)   | >0.05       | 48.06/NA                             | V           | V             | ↓↓  | ↓↓           | ↓                | x       | VL    | L | 1.94 (0.81, 4.64)  |
| <b>CBD</b>      |                         |                 |                               |    |      |        |                     |             |                                      |             |               |     |              |                  |         |       |   |                    |
| Treves, 2021    | Mixed conditions (C)    | CBD             | 50% seizure reduction         | 2  | 1026 | RR     | 1.70 (1.09, 2.65)   | 0.01<p<0.05 | 3.83/0.01                            | V           | V             | V   | V            | V                | x       | H     | H | 0.59 (0.38, 0.92)  |
| Treves, 2021    | Mixed conditions (C)    | CBD             | Reported seizure events       | 3  | 318  | RR     | 0.59 (0.36, 0.96)   | 0.01<p<0.05 | 23.21/0.05                           | V           | V             | V   | V            | V                | x       | H     | H | 0.59 (0.36, 0.96)  |
| Chesney, 2020   | Mixed conditions (C, A) | CBD             | Pneumonia                     | 3  | 516  | OR     | 5.37 (1.95, 24.94)  | 0.01<p<0.05 | 1.36/                                | ↓↓          | V             | V   | V            | V                | x       | M     | H | 5.37 (1.95, 24.94) |

| Author, year     | Population              | Cannabinoid | Outcome                               | k  | N    | Metric | ES (95% CI)        | p           | I <sup>2</sup> /<br>tau <sup>2</sup> | Imprecision | Inconsistency | RoB | Indirectness | Publication bias | Upgrade | GRADE | Q | eOR (95% CI)       |
|------------------|-------------------------|-------------|---------------------------------------|----|------|--------|--------------------|-------------|--------------------------------------|-------------|---------------|-----|--------------|------------------|---------|-------|---|--------------------|
|                  |                         |             |                                       |    |      |        |                    |             | 0.03                                 |             |               |     |              |                  |         |       |   |                    |
| Chesney, 2020    | Mixed conditions (C, A) | CBD         | Somnolence                            | 5  | 570  | OR     | 2.97 (1.92, 6.11)  | <0.005      | 31.35/<br>0.21                       | ↓           | V             | V   | V            | V                | x       | M     | H | 2.97 (1.92, 6.11)  |
| Treves, 2021     | Mixed conditions (C)    | CBD         | Gastrointestinal hyperactivity events | 3  | 352  | RR     | 2.30 (1.28, 4.13)  | <0.005      | 30.26/<br>0.08                       | ↓           | V             | V   | V            | V                | +       | M     | H | 2.30 (1.28, 4.13)  |
| Chesney, 2020    | Mixed conditions (C, A) | CBD         | Tolerability                          | 5  | 570  | OR     | 3.66 (1.04, 12.95) | 0.01<p<0.05 | 22.80/<br>0.47                       | ↓↓          | V             | V   | V            | V                | x       | M     | H | 3.66 (1.04, 12.95) |
| Chesney, 2020    | Mixed conditions (C, A) | CBD         | Acceptability                         | 6  | 521  | OR     | 1.30 (0.45, 3.76)  | >0.05       | 0.00/<br>NA                          | V           | V             | ↓↓  | ↓            | ↓                | x       | L     | H | 1.30 (0.45, 3.76)  |
| Chesney, 2020    | Mixed conditions (C, A) | CBD         | Adverse event - Any                   | 10 | 775  | OR     | 1.55 (1.03, 2.33)  | 0.01<p<0.05 | 22.0/<br>NA                          | V           | V             | ↓↓  | ↓            | ↓                | x       | L     | H | 1.55 (1.03, 2.33)  |
| Chesney, 2020    | Mixed conditions (C, A) | CBD         | Adverse event - Decreased appetite    | 7  | 606  | OR     | 3.56 (1.94, 6.53)  | <0.005      | 0.00/<br>NA                          | V           | V             | ↓↓  | ↓            | ↓                | x       | L     | H | 3.56 (1.94, 6.53)  |
| Chesney, 2020    | Mixed conditions (C, A) | CBD         | Adverse event - Diarrhoea             | 9  | 734  | OR     | 2.61 (1.46, 4.67)  | <0.005      | 15.00/<br>NA                         | V           | V             | ↓↓  | ↓            | ↓                | x       | L     | H | 2.61 (1.46, 4.67)  |
| Chesney, 2020    | Mixed conditions (C, A) | CBD         | Adverse event - Sedation              | 4  | 266  | OR     | 4.21 (1.18, 15.01) | 0.01<p<0.05 | 0.00/<br>0.00                        | V           | V             | ↓↓  | ↓            | ↓                | x       | L     | H | 4.21 (1.18, 15.01) |
| Chesney, 2020    | Mixed conditions (C, A) | CBD         | Adverse event - Somnolence            | 7  | 682  | OR     | 2.23 (1.07, 4.64)  | 0.01<p<0.05 | 37.00/<br>NA                         | V           | V             | ↓↓  | ↓            | ↓                | x       | L     | H | 2.23 (1.07, 4.64)  |
| Chesney, 2020    | Mixed conditions (C, A) | CBD         | Constipation                          | 3  | 230  | OR     | 0.74 (0.18, 3.08)  | >0.05       | 15.00/<br>NA                         | V           | V             | ↓↓  | ↓            | ↓                | x       | L     | H | 0.74 (0.18, 3.08)  |
| Chesney, 2020    | Mixed conditions (C, A) | CBD         | Convulsion                            | 4  | 550  | OR     | 1.54 (0.38, 6.33)  | >0.05       | 0.00/<br>NA                          | V           | V             | ↓↓  | ↓            | ↓                | x       | L     | H | 0.65 (0.16, 2.65)  |
| Chesney, 2020    | Mixed conditions (C, A) | CBD         | Cough                                 | 5  | 377  | OR     | 0.69 (0.16, 2.92)  | >0.05       | 0.00/<br>NA                          | V           | V             | ↓↓  | ↓            | ↓                | x       | L     | H | 0.69 (0.16, 2.92)  |
| Velayudhan, 2021 | Mixed conditions(A)     | THC, CBD    | Death                                 | 26 | 3622 | IRR    | 1.14 (0.89, 1.46)  | >0.05       | 0.00/<br>NA                          | V           | V             | ↓↓  | V            | ↓                | x       | L     | L | 1.14 (0.89, 1.46)  |

| Author, year     | Population              | Cannabinoid   | Outcome                                  | k  | N    | Metric | ES (95% CI)       | p     | I <sup>2</sup> /<br>tau <sup>2</sup> | Imprecision | Inconsistency | RoB | Indirectness | Publication bias | Upgrade | GRADE | Q | eOR (95% CI)      |
|------------------|-------------------------|---------------|------------------------------------------|----|------|--------|-------------------|-------|--------------------------------------|-------------|---------------|-----|--------------|------------------|---------|-------|---|-------------------|
|                  |                         |               |                                          |    |      |        |                   |       | NA                                   |             |               |     |              |                  |         |       |   |                   |
| Treves, 2021     | Mixed conditions (C)    | CBM, CBD      | Decreased appetite                       | 5  | 642  | RR     | 2.10 (0.96, 4.62) | >0.05 | 22.00/<br>NA                         | ↓           | V             | ↓↓  | V            | ↓                | x       | L     | H | 2.10 (0.96, 4.62) |
| Chesney, 2020    | Mixed conditions (C, A) | CBD           | Fatigue                                  | 8  | 646  | OR     | 1.27 (0.45, 3.36) | >0.05 | 44.00/<br>NA                         | V           | V             | ↓↓  | ↓            | ↓                | x       | L     | H | 1.27 (0.45, 3.36) |
| Treves, 2021     | Mixed conditions (C)    | CBM, THC/CBD  | Gastrointestinal hyperactivity events    | 5  | 706  | RR     | 1.63 (0.96, 2.76) | >0.05 | 62.00/<br>NA                         | V           | V             | ↓↓  | V            | ↓                | x       | L     | H | 1.63 (0.96, 2.76) |
| Treves, 2021     | Mixed conditions (C)    | CBD:THC mixed | Gastrointestinal hyperactivity events    | 2  | 354  | RR     | 1.04 (0.63, 1.73) | >0.05 | 0.00/<br>NA                          | V           | V             | ↓↓  | V            | ↓                | x       | L     | H | 1.04 (0.63, 1.73) |
| Chesney, 2020    | Mixed conditions (C, A) | CBD           | Headache                                 | 9  | 734  | OR     | 0.92 (0.45, 1.86) | >0.05 | 0.00/<br>NA                          | V           | V             | ↓↓  | ↓            | ↓                | x       | L     | H | 0.92 (0.45, 1.86) |
| Chesney, 2020    | Mixed conditions (C, A) | CBD           | Insomnia                                 | 4  | 364  | OR     | 1.14 (0.35, 3.77) | >0.05 | 0.00/<br>NA                          | V           | V             | ↓↓  | ↓            | ↓                | x       | L     | H | 1.14 (0.35, 3.77) |
| Chesney, 2020    | Mixed conditions (C, A) | CBD           | Nasopharyngitis                          | 6  | 455  | OR     | 1.19 (0.55, 2.57) | >0.05 | 0.00/<br>NA                          | V           | V             | ↓↓  | ↓            | ↓                | x       | L     | H | 1.19 (0.55, 2.57) |
| Chesney, 2020    | Mixed conditions (C, A) | CBD           | Pyrexia                                  | 4  | 550  | OR     | 1.16 (0.60, 2.25) | >0.05 | 24.00/<br>NA                         | V           | V             | ↓↓  | ↓            | ↓                | x       | L     | H | 1.16 (0.60, 2.25) |
| Treves, 2021     | Mixed conditions (C)    | CBD:THC mixed | Reported seizure events                  | 2  | 144  | RR     | 1.35 (0.46, 4.03) | >0.05 | 0.00/<br>NA                          | ↓           | V             | ↓↓  | V            | ↓                | x       | L     | H | 1.35 (0.46, 4.03) |
| Treves, 2021     | Mixed conditions (C)    | CBM, THC/CBD  | Reported seizure events                  | 5  | 706  | RR     | 0.71 (0.41, 1.25) | >0.05 | 24.00/<br>NA                         | V           | V             | ↓↓  | V            | ↓                | x       | L     | H | 0.71 (0.41, 1.25) |
| Treves, 2021     | Mixed conditions (C)    | CBM, THC/CBD  | Serious adverse events                   | 6  | 744  | RR     | 1.63 (0.80, 3.29) | >0.05 | 0.00/<br>NA                          | V           | V             | ↓↓  | V            | ↓                | x       | L     | H | 1.63 (0.80, 3.29) |
| Velayudhan, 2021 | Mixed conditions(A)     | THC, CBD      | All cause serious adverse events         | 26 | 3803 | IRR    | 1.17 (0.99, 1.39) | >0.05 | 7.00/<br>NA                          | V           | V             | ↓↓  | V            | ↓                | x       | L     | L | 1.17 (0.99, 1.39) |
| Velayudhan, 2021 | Mixed conditions(A)     | THC, CBD      | Treatment related serious adverse events | 21 | 2627 | IRR    | 1.19 (0.88, 1.62) | >0.05 | 0.00/<br>NA                          | V           | V             | ↓↓  | V            | ↓                | x       | L     | L | 1.19 (0.88, 1.62) |



| Author, year  | Population              | Cannabinoid | Outcome                            | k  | N   | Metric | ES (95% CI)        | p           | I <sup>2</sup> /<br>tau <sup>2</sup> | Imprecision | Inconsistency | RoB | Indirectness | Publication bias | Upgrade | GRADE | Q | eOR (95% CI)       |
|---------------|-------------------------|-------------|------------------------------------|----|-----|--------|--------------------|-------------|--------------------------------------|-------------|---------------|-----|--------------|------------------|---------|-------|---|--------------------|
| Chesney, 2020 | Mixed conditions (C, A) | CBD         | Status epilepticus                 | 4  | 550 | OR     | 1.36 (0.54, 3.41)  | >0.05       | 0.00/<br>NA                          | V           | V             | ↓↓↓ | ↓            | ↓                | x       | L     | H | 1.36 (0.54, 3.41)  |
| Chesney, 2020 | Mixed conditions (C, A) | CBD         | Upper respiratory tract infections | 5  | 575 | OR     | 0.92 (0.51, 1.67)  | >0.05       | 0.00/<br>NA                          | V           | V             | ↓↓↓ | ↓            | ↓                | x       | L     | H | 0.92 (0.51, 1.67)  |
| Chesney, 2020 | Mixed conditions (C, A) | CBD         | Vomiting                           | 7  | 622 | OR     | 0.93 (0.54, 1.60)  | >0.05       | 0.00/<br>NA                          | V           | V             | ↓↓↓ | ↓            | ↓                | x       | L     | H | 0.93 (0.54, 1.60)  |
| Chesney, 2020 | Mixed conditions (C, A) | CBD         | Withdrawal - Adverse events        | 7  | 683 | OR     | 2.65 (1.04, 6.80)  | 0.01<p<0.05 | 0.00/<br>0.00                        | V           | V             | ↓↓↓ | ↓            | ↓                | x       | L     | H | 2.65 (1.04, 6.80)  |
| Chesney, 2020 | Mixed conditions (C, A) | CBD         | Withdrawal - Any reason            | 11 | 779 | OR     | 2.61 (1.38, 4.96)  | <0.005      | 0.00/<br>0.00                        | V           | V             | ↓↓↓ | ↓            | ↓                | x       | L     | H | 2.61 (1.38, 4.96)  |
| Chesney, 2020 | Mixed conditions (C, A) | CBD         | Irritability                       | 3  | 379 | OR     | 2.84 (0.80, 10.03) | >0.05       | 0.00/<br>NA                          | ↓           | V             | ↓↓↓ | ↓            | ↓                | x       | VL    | H | 2.84 (0.80, 10.03) |
| Chesney, 2020 | Mixed conditions (C, A) | CBD         | Rash                               | 6  | 315 | OR     | 2.33 (0.70, 7.76)  | >0.05       | 0.00/<br>NA                          | ↓           | V             | ↓↓↓ | ↓            | ↓                | x       | VL    | H | 2.33 (0.70, 7.76)  |
| Chesney, 2020 | Mixed conditions (C, A) | CBD         | Serious adverse event - Pneumonia  | 3  | 516 | OR     | 5.37 (1.17, 24.65) | 0.01<p<0.05 | 0.00/<br>NA                          | ↓↓↓         | V             | ↓↓↓ | ↓            | ↓                | x       | VL    | H | 5.37 (1.17, 24.65) |
| Chesney, 2020 | Mixed conditions (C, A) | CBD         | Abdominal pain                     | 4  | 103 | OR     | 1.14 (0.25, 5.16)  | >0.05       | 0.00/<br>NA                          | ↓           | V             | ↓↓↓ | ↓            | ↓                | x       | VL    | H | 1.14 (0.25, 5.16)  |
| Chesney, 2020 | Mixed conditions (C, A) | CBD         | Abnormal liver test                | 4  | 199 | OR     | 3.41 (0.73, 15.88) | >0.05       | 0.00/<br>NA                          | ↓           | V             | ↓↓↓ | ↓            | ↓                | x       | VL    | H | 3.41 (0.73, 15.88) |
| Chesney, 2020 | Mixed conditions (C, A) | CBD         | Dizziness                          | 5  | 137 | OR     | 0.44 (0.12, 1.58)  | >0.05       | 0.00/<br>NA                          | ↓           | V             | ↓↓↓ | ↓            | ↓                | x       | VL    | H | 0.44 (0.12, 1.58)  |
| Chesney, 2020 | Mixed conditions (C, A) | CBD         | Gastrointestinal                   | 3  | 153 | OR     | 1.78 (0.34, 9.36)  | >0.05       | 72.00/<br>NA                         | ↓           | V             | ↓↓↓ | ↓            | ↓                | x       | VL    | H | 1.78 (0.34, 9.36)  |
| Chesney, 2020 | Mixed conditions (C, A) | CBD         | Nausea                             | 5  | 184 | OR     | 1.74 (0.49, 6.13)  | >0.05       | 0.00/<br>NA                          | ↓           | V             | ↓↓↓ | ↓            | ↓                | x       | VL    | H | 1.74 (0.49, 6.13)  |

| Author, year                   | Population                                                    | Cannabinoid               | Outcome                     | k  | N    | Metric | ES (95% CI)          | p           | I <sup>2</sup> /<br>tau <sup>2</sup> | Imprecision | Inconsistency | RoB | Indirectness | Publication bias | Upgrade | GRADE | Q | eOR (95% CI)       |
|--------------------------------|---------------------------------------------------------------|---------------------------|-----------------------------|----|------|--------|----------------------|-------------|--------------------------------------|-------------|---------------|-----|--------------|------------------|---------|-------|---|--------------------|
| Chesney, 2020                  | Mixed conditions (C, A)                                       | CBD                       | Nervous system disorder     | 2  | 112  | OR     | 2.00 (0.10, 38.36)   | >0.05       | 81.00/<br>NA                         | ↓           | ↓             | ↓↓↓ | ↓            | ↓                | x       | VL    | H | 2.00 (0.10, 38.36) |
| Chesney, 2020                  | Mixed conditions (C, A)                                       | CBD                       | Lethargy                    | 4  | 390  | OR     | 1.42 (0.45, 4.50)    | >0.05       | 21.00/<br>NA                         | ↓           | V             | ↓↓↓ | ↓            | ↓                | x       | VL    | H | 1.42 (0.45, 4.50)  |
| Chesney, 2020                  | Mixed conditions (C, A)                                       | CBD                       | Serious adverse event - Any | 7  | 710  | OR     | 2.30 (1.18, 4.48)    | 0.01<p<0.05 | 16.00/<br>NA                         | ↓           | V             | ↓↓↓ | ↓            | ↓                | x       | VL    | H | 2.30 (1.18, 4.48)  |
| Chesney, 2020                  | Mixed conditions (C, A)                                       | CBD                       | Nasal congestion            | 3  | 216  | OR     | 0.89 (0.09, 8.97)    | >0.05       | 55.00/<br>NA                         | ↓           | V             | ↓↓↓ | ↓            | ↓                | x       | VL    | H | 0.89 (0.09, 8.97)  |
| <b>Chronic pain conditions</b> |                                                               |                           |                             |    |      |        |                      |             |                                      |             |               |     |              |                  |         |       |   |                    |
| Stockings, 2018                | Mixed conditions (chronic pain, non-cancer, A)                | CBM                       | Pain 30% reduction          | 9  | 1734 | OR     | 1.70 (1.08, 2.68)    | 0.01<p<0.05 | 66.31/<br>0.28                       | V           | V             | V   | V            | V                | x       | H     | M | 0.59 (0.37, 0.93)  |
| Wang, 2021                     | Mixed conditions (chronic pain, A)                            | CBM or cannabinoids       | Pain relief                 | 4  | 1359 | MD     | -0.09 (-0.30, 0.10)  | >0.05       | 40.19/<br>0.02                       | V           | V             | V   | V            | V                | x       | H     | H | NA                 |
| Wong, 2020                     | Mixed conditions (chronic pain, non-cancer, A)                | Cannabinoids (oromucosal) | Analgesic efficacy          | 14 | 1767 | MD     | -0.44 (-0.67, -0.21) | <0.005      | 48.18/<br>0.08                       | V           | V             | ↓↓↓ | V            | V                | x       | M     | L | NA, beneficial     |
| Wong, 2020                     | Mixed conditions (chronic MS neuropathic pain, A)             | Cannabinoids              | Analgesic efficacy          | 11 | 1258 | MD     | -0.67 (-0.97, -0.37) | <0.005      | 49.57/<br>0.11                       | V           | V             | ↓↓↓ | V            | V                | x       | M     | L | NA, beneficial     |
| Wong, 2020                     | Mixed conditions (chronic pain, non-cancer, A)                | Cannabinoids              | Analgesic efficacy          | 38 | 3382 | MD     | -0.63 (-0.82, -0.44) | <0.005      | 64.55/<br>0.19                       | V           | V             | ↓↓↓ | V            | V                | x       | M     | L | NA, beneficial     |
| Wong, 2020                     | Mixed conditions (chronic pain, non-cancer, A)                | Cannabinoids (oral)       | Analgesic efficacy          | 11 | 735  | MD     | -0.75 (-1.14, -0.35) | <0.005      | 57.59/<br>0.23                       | V           | V             | ↓↓↓ | V            | V                | x       | M     | L | NA, beneficial     |
| Wong, 2020                     | Mixed conditions (chronic non-cancer non-neuropathic pain, A) | Cannabinoids              | Analgesic efficacy          | 8  | 729  | MD     | -0.61 (-1.01, -0.22) | <0.005      | 62.64/<br>0.18                       | V           | V             | ↓↓↓ | V            | V                | x       | M     | L | NA, beneficial     |
| Mucke, 2018                    | Mixed conditions (chronic neuropathic pain, A)                | CBM                       | Pain 50% reduction          | 9  | 1001 | RD     | 0.06 (-0.01, 0.12)   | >0.05       | 65.77/<br>0.01                       | V           | V             | ↓↓↓ | V            | V                | x       | M     | H | NA                 |

| Author, year    | Population                                      | Cannabinoid            | Outcome                                           | k  | N    | Metric | ES (95% CI)          | p            | I <sup>2</sup> /<br>tau <sup>2</sup> | Imprecision | Inconsistency | RoB | Indirectness | Publication bias | Upgrade | GRADE | Q | eOR (95% CI)      |
|-----------------|-------------------------------------------------|------------------------|---------------------------------------------------|----|------|--------|----------------------|--------------|--------------------------------------|-------------|---------------|-----|--------------|------------------|---------|-------|---|-------------------|
| Andreae, 2015   | Pain, chronic neuropathic (Ado, A)              | Cannabis (inhaled)     | Pain reduction                                    | 9  | 520  | OR     | 3.14 (1.90, 5.18)    | <0.005       | 3.24/<br>0.02                        | V           | V             | ↓   | ↓            | V                | x       | M     | L | 0.32 (0.19, 0.52) |
| Mucke, 2018     | Mixed conditions (chronic neuropathic pain, A)  | CBM                    | Pain reduction, response (30% reduction)          | 11 | 1586 | RD     | 0.09 (0.03, 0.15)    | 0.005<p<0.01 | 36.19/<br>0.00                       | V           | V             | ↓↓  | V            | V                | x       | M     | H | NA, beneficial    |
| Mucke, 2018     | Mixed conditions (chronic neuropathic pain, A)  | CBM                    | Patient global impression much/very much improved | 6  | 1090 | RD     | 0.10 (-0.00, 0.19)   | >0.05        | 72.64/<br>0.01                       | V           | V             | ↓↓  | V            | V                | x       | M     | H | NA                |
| Mucke, 2018     | Mixed conditions (chronic neuropathic pain, A)  | CBM                    | Psychological distress                            | 10 | 751  | d      | -0.31 (-0.61, -0.01) | 0.01<p<0.05  | 66.91/<br>0.14                       | V           | V             | ↓↓  | V            | V                | x       | M     | H | 1.76 (1.03, 3.05) |
| Mucke, 2018     | Mixed conditions (chronic neuropathic pain, A)  | CBM                    | Withdrawals due to adverse events                 | 16 | 1778 | RD     | 0.04 (0.02, 0.07)    | <0.005       | 25.84/<br>0.00                       | V           | V             | ↓↓  | V            | V                | x       | M     | H | NA, harmful       |
| Stockings, 2018 | Mixed conditions (chronic pain, non-cancer, A)  | CBM                    | Pain, change in pain scores                       | 34 | 3866 | d      | -0.17 (-0.28, -0.05) | <0.005       | 62.20/<br>0.06                       | V           | V             | ↓↓  | V            | V                | x       | M     | H | 0.73 (0.60, 0.90) |
| Wong, 2020      | Mixed conditions (chronic pain, non-cancer, A)  | Cannabinoids (inhaled) | Analgesic efficacy                                | 8  | 468  | MD     | -1.06 (-1.56, -0.55) | <0.005       | 79.76/<br>0.39                       | V           | ↓             | ↓↓  | V            | ↓                | x       | L     | L | NA, beneficial    |
| Wong, 2020      | Mixed conditions (chronic neuropathic pain, A)  | Cannabinoids           | Analgesic efficacy                                | 25 | 2060 | MD     | -0.74 (-0.94, -0.54) | <0.005       | 52.74/<br>0.12                       | V           | V             | ↓↓  | V            | ↓                | x       | L     | L | NA, beneficial    |
| Mucke, 2018     | Mixed conditions (chronic neuropathic pain, A)  | CBM                    | Any adverse event                                 | 7  | 1356 | RD     | 0.20 (0.10, 0.30)    | <0.005       | 79.71/<br>0.00                       | V           | ↓             | ↓↓  | V            | ↓                | x       | L     | H | NA, harmful       |
| Spanagel, 2021  | Mixed conditions (chronic, neuropathic pain, A) | CBM, THC/CBD           | Appetite decrease                                 | 9  | 948  | OR     | 0.70 (0.42, 1.17)    | >0.05        | 18.00/<br>NA                         | V           | V             | ↓↓  | ↓            | ↓                | x       | L     | H | 0.70 (0.42, 1.17) |
| Mucke, 2018     | Mixed conditions (chronic neuropathic pain, A)  | CBM                    | Health related quality of life                    | 9  | 1284 | d      | 0.02 (-0.10, 0.30)   | >0.05        | 0.00/<br>NA                          | V           | V             | ↓↓  | V            | ↓                | x       | L     | H | 0.96 (0.67, 1.39) |

| Author, year          | Population                                            | Cannabinoid  | Outcome                                       | k  | N    | Metric | ES (95% CI)           | p            | I <sup>2</sup> /<br>tau <sup>2</sup> | Imprecision | Inconsistency | RoB | Indirectness | Publication bias | Upgrade | GRADE | Q | eOR (95% CI)      |
|-----------------------|-------------------------------------------------------|--------------|-----------------------------------------------|----|------|--------|-----------------------|--------------|--------------------------------------|-------------|---------------|-----|--------------|------------------|---------|-------|---|-------------------|
| Sainsbury, 2021       | Mixed conditions (chronic, neuropathic pain, A)       | THC/CBD      | Pain intensity, 30% reduction from baseline   | 2  | 371  | RR     | 1.75 (1.16, 2.65)     | <0.005       | 0.00/<br>0.00                        | V           | V             | ↓↓  | ↓            | V                | x       | L     | L | 0.57 (0.38, 0.86) |
| Sainsbury, 2021       | Mixed conditions (chronic, neuropathic pain, A)       | THC          | Pain intensity, 30% reduction from baseline   | 6  | 213  | RR     | 1.98 (1.48, 2.62)     | <0.005       | 29.26/<br>0.04                       | V           | V             | ↓↓  | ↓            | V                | x       | L     | L | 0.51 (0.38, 0.67) |
| Sainsbury, 2021       | Mixed conditions (chronic neuropathic pain, A)        | CBM, THC/CBD | Pain intensity, change from baseline          | 6  | 196  | MD     | -8.67 (-11.50, -5.84) | <0.005       | 15.60/<br>2.04                       | ↓           | V             | ↓↓  | ↓            | V                | x       | L     | L | NA, beneficial    |
| Wang, 2021            | Mixed conditions (chronic pain, A)                    | CBM          | Pain relief                                   | 27 | 3939 | MD     | -0.98 (-1.47, -0.49)  | <0.005       | 94.12/<br>1.44                       | V           | ↓↓            | V   | V            | ↓                | x       | L     | H | NA, beneficial    |
| Mucke, 2018           | Mixed conditions (chronic neuropathic pain, A)        | CBM          | Pain, mean intensity                          | 17 | 1837 | d      | -0.35 (-0.60, -0.09)  | 0.005<p<0.01 | 83.90/<br>0.22                       | V           | ↓             | ↓↓  | V            | V                | x       | L     | H | 0.53 (0.33, 0.84) |
| Mucke, 2018           | Mixed conditions (chronic cancer neuropathic pain, A) | CBM          | Serious adverse events                        | 11 | 968  | RD     | 0.06 (0.01, 0.10)     | 0.01<p<0.05  | 0.00/<br>NA                          | V           | V             | ↓↓  | ↓            | V                | x       | L     | H | NA, harmful       |
| Mucke, 2018           | Mixed conditions (chronic neuropathic pain, A)        | CBM          | Serious adverse events                        | 13 | 1876 | RD     | 0.01 (-0.01, 0.03)    | >0.05        | 0.00/<br>NA                          | V           | V             | ↓↓  | V            | ↓                | x       | L     | H | NA                |
| Spanagel, 2021        | Mixed conditions (chronic, neuropathic pain, A)       | THC          | Sleep decrease                                | 13 | 1100 | OR     | 1.12 (0.79, 1.57)     | >0.05        | 0.00/<br>NA                          | V           | V             | ↓↓  | ↓            | V                | x       | L     | H | 1.12 (0.79, 1.57) |
| Mucke, 2018           | Mixed conditions (chronic neuropathic pain, A)        | CBM          | Specific adverse effects NCS                  | 11 | 1305 | RD     | 0.38 (0.17, 0.58)     | <0.005       | 94.35/<br>NA                         | V           | ↓↓            | ↓↓  | V            | V                | x       | L     | H | NA, harmful       |
| Mucke, 2018           | Mixed conditions (chronic neuropathic pain, A)        | CBM          | Specific adverse effects psychiatric disorder | 11 | 1314 | RD     | 0.10 (0.06, 0.16)     | <0.005       | 55.05/<br>0.01                       | V           | V             | ↓↓  | V            | ↓                | x       | L     | H | NA, harmful       |
| Mucke, 2018           | Mixed conditions (chronic neuropathic pain, A)        | CBM          | Withdrawals due to lack of efficacy           | 9  | 1576 | RD     | 0.00 (-0.02, 0.01)    | >0.05        | 0.00/<br>NA                          | V           | V             | ↓↓  | V            | ↓                | x       | L     | H | NA                |
| Allende-Salazar, 2017 | Mixed conditions (chronic non-cancer pain)(A)         | CBM          | Pain reduction, response (30% reduction)      | 15 | 1788 | RR     | 1.27 (1.12, 1.44)     | 0.01<p<0.05  | NA/<br>NA                            | V           | ↓↓            | ↓↓  | V            | V                | x       | L     | L | 0.79 (0.69, 0.89) |

| Author, year    | Population                                              | Cannabinoid  | Outcome                            | k  | N    | Metric | ES (95% CI)             | p           | I <sup>2</sup> /<br>tau <sup>2</sup> | Imprecision | Inconsistency | RoB | Indirectness | Publication bias | Upgrade | GRADE | Q | eOR (95% CI)      |
|-----------------|---------------------------------------------------------|--------------|------------------------------------|----|------|--------|-------------------------|-------------|--------------------------------------|-------------|---------------|-----|--------------|------------------|---------|-------|---|-------------------|
| Gazendam, 2020  | Surgery (A)                                             | CBM          | Pain score                         | 6  | 678  | MD     | -0.90 (-1.69, -0.10)    | 0.01<p<0.05 | NA/<br>NA                            | V           | ↓↓            | ↓↓  | V            | ↓                | x       | VL    | L | NA, beneficial    |
| Sainsbury, 2021 | Mixed conditions (chronic, neuropathic pain, A)         | CBM, THC/CBD | Pain, difference in post-treatment | 2  | 77   | MD     | 1.00 (-19.14, 21.15)    | >0.05       | NR/<br>NA                            | ↓           | ↓             | ↓↓  | ↓            | ↓                | x       | VL    | L | NA                |
| Mucke, 2018     | Mixed conditions (chronic neuropathic pain, A)          | CBM          | Sleep problems                     | 11 | 1386 | d      | -0.44 (-0.83, -0.05)    | 0.01<p<0.05 | 93.03/<br>0.39                       | V           | ↓↓            | ↓↓  | V            | ↓                | x       | VL    | H | 2.22 (1.09, 4.49) |
| <b>Epilepsy</b> |                                                         |              |                                    |    |      |        |                         |             |                                      |             |               |     |              |                  |         |       |   |                   |
| Elliott, 2018   | Epilepsy (C)                                            | CBD          | Diarrhoea                          | 3  | 516  | RR     | 2.25 (1.33, 3.81)       | <0.005      | 12.17/<br>0.03                       | V           | V             | V   | V            | V                | +       | H     | M | 2.25 (1.33, 3.81) |
| Elliott, 2018   | Epilepsy (C)                                            | CBD          | Sleep disruption                   | 3  | 516  | MD     | -0.29 (-0.88, 0.30)     | >0.05       | 23.44/<br>0.06                       | V           | V             | V   | V            | V                | x       | H     | M | NA                |
| Elliott, 2018   | Epilepsy (C)                                            | CBD          | Seizures, frequency reduction      | 3  | 516  | Median | -20.18 (-27.40, -12.96) | <0.005      | 0.03/<br>0.01                        | ↓↓          | V             | V   | V            | V                | x       | M     | M | NA, beneficial    |
| Elliott, 2018   | Epilepsy (C)                                            | CBD          | Tonic-clonic seizure reduction     | 3  | 321  | Median | -26.67 (-39.04, -14.30) | <0.005      | 7.95/<br>9.56                        | ↓↓          | V             | V   | V            | V                | x       | M     | M | NA, beneficial    |
| Stockings, 2018 | Epilepsy (any age)                                      | CBD          | Any adverse event                  | 5  | 531  | RR     | 1.24 (1.13, 1.36)       | 0.01<p<0.05 | 0.00/<br>NA                          | V           | V             | ↓↓  | V            | V                | x       | M     | H | 1.24 (1.13, 1.36) |
| Lattanzi, 2018  | Treatment-resistant Dravet syndrome, Lennox-Gastaut (C) | CBD          | Any adverse event                  | 2  | 396  | OR     | 1.23 (1.10, 1.37)       | <0.005      | 0.00/<br>0.00                        | V           | V             | V   | V            | ↓                | x       | M     | H | 1.23 (1.10, 1.37) |
| Lattanzi, 2018  | TR epilepsy (Ado, A)                                    | CBD          | Any seizure frequency              | 3  | 516  | MD     | 19.94 (11.79, 28.08)    | <0.005      | 0.06/<br>0.03                        | ↓           | V             | V   | V            | V                | x       | M     | H | NA, beneficial    |
| Lattanzi, 2018  | TR epilepsy (Ado, A)                                    | CBD          | Convulsive seizure frequency       | 3  | 516  | MD     | 20.54 (12.56, 28.52)    | <0.005      | 0.46/<br>0.24                        | ↓           | V             | V   | V            | V                | x       | M     | H | NA, beneficial    |

| Author, year      | Population                          | Cannabinoid | Outcome                                 | k | N   | Metric | ES (95% CI)        | p           | I <sup>2</sup> /<br>tau <sup>2</sup> | Imprecision | Inconsistency | RoB | Indirectness | Publication bias | Upgrade | GRADE | Q  | eOR (95% CI)      |
|-------------------|-------------------------------------|-------------|-----------------------------------------|---|-----|--------|--------------------|-------------|--------------------------------------|-------------|---------------|-----|--------------|------------------|---------|-------|----|-------------------|
| Lattanzi, 2018    | Epilepsy, all-types seizures        | CBD         | Decreased appetite                      | 4 | 550 | RR     | 3.69 (2.02, 6.72)  | <0.005      | 0.00/<br>NA                          | V           | V             | ↓↓  | V            | V                | x       | M     | H  | 3.69 (2.02, 6.72) |
| Lattanzi, 2018    | Epilepsy, all-types seizures        | CBD         | Diarrhoea                               | 4 | 516 | RR     | 2.25 (1.38, 3.68)  | <0.005      | 0.00/<br>NA                          | V           | V             | ↓↓  | V            | V                | x       | M     | H  | 2.25 (1.38, 3.68) |
| Elliott, 2018     | Epilepsy (C)                        | CBD         | Gastrointestinal adverse events         | 4 | 550 | RR     | 1.54 (0.92, 2.58)  | >0.05       | 52.00/<br>NA                         | V           | V             | ↓↓  | V            | V                | x       | M     | H  | 1.54 (0.92, 2.58) |
| Lattanzi, 2018    | Epilepsy, all-types seizures        | CBD         | Global impression change                | 4 | 510 | RR     | 1.57 (1.30, 1.91)  | <0.005      | 0.00/<br>NA                          | V           | V             | ↓↓  | V            | V                | x       | M     | H  | 0.64 (0.52, 0.77) |
| Lattanzi, 2020    | Dravet syndrome (C)                 | CBD         | Global impression change                | 2 | 202 | RR     | 1.51 (1.21, 1.89)  | <0.005      | 0.00/<br>NA                          | V           | V             | ↓↓  | V            | V                | x       | M     | CL | 0.66 (0.53, 0.83) |
| Stockings, 2018   | Epilepsy (any age)                  | CBD         | Quality of life                         | 2 | 274 | RR     | 1.73 (1.33, 2.26)  | 0.01<p<0.05 | 0.00/<br>NA                          | V           | V             | ↓↓  | V            | V                | x       | M     | M  | 0.58 (0.44, 0.75) |
| Elliott, 2018     | Epilepsy (C)                        | CBD         | Quality of life                         | 3 | 516 | MD     | 0.60 (-2.60, 3.90) | >0.05       | 0.00/<br>NA                          | V           | V             | ↓↓  | V            | V                | x       | M     | H  | NA                |
| De Carvalho, 2020 | Treatment-resistant epilepsy (C, A) | CBD         | Seizure reduction                       | 6 | 892 | OR     | 3.08 (2.22, 4.27)  | <0.005      | 9.95/<br>0.02                        | V           | V             | ↓   | V            | V                | x       | M     | H  | 0.33 (0.23, 0.45) |
| Stockings, 2018   | Epilepsy (any age)                  | CBD         | Seizure, 50% or greater reduction       | 2 | 291 | RR     | 1.74 (1.24, 2.30)  | 0.01<p<0.05 | 0.00/<br>NA                          | V           | V             | ↓↓  | V            | V                | x       | M     | H  | 0.57 (0.42, 0.78) |
| Lattanzi, 2020    | Dravet syndrome, Lennox-Gastaut (C) | CBD         | Seizure, 50% reduction                  | 8 | 714 | RR     | 1.87 (1.39, 2.52)  | <0.005      | 28.84/<br>0.05                       | V           | V             | V   | ↓            | V                | x       | M     | M  | 0.53 (0.39, 0.72) |
| Lattanzi, 2018    | Lennox-gastaut syndrome (C)         | CBD         | 50% seizure reduction                   | 2 | 291 | RR     | 1.75 (1.23, 2.48)  | <0.005      | 0.00/<br>NA                          | V           | V             | ↓↓  | V            | V                | x       | M     | CL | 0.58 (0.40, 0.81) |
| Lattanzi, 2018    | Lennox-gastaut syndrome (C)         | CBD         | Seizure, 50% reduction in drop seizures | 2 | 396 | OR     | 2.13 (1.44, 3.17)  | <0.005      | 16.78/<br>0.01                       | V           | V             | V   | V            | ↓                | x       | M     | H  | 0.47 (0.31, 0.70) |
| Lattanzi, 2018    | Epilepsy, all-types seizures        | CBD         | Serious adverse events                  | 4 | 550 | RR     | 2.61 (1.52, 4.47)  | <0.005      | 0.01/<br>NA                          | V           | V             | ↓↓  | V            | V                | x       | M     | H  | 2.61 (1.52, 4.47) |

| Author, year   | Population                                              | Cannabinoid | Outcome                                        | k | N   | Metric | ES (95% CI)         | p           | I <sup>2</sup> /<br>tau <sup>2</sup> | Imprecision | Inconsistency | RoB | Indirectness | Publication bias | Upgrade | GRADE | Q | eOR (95% CI)        |
|----------------|---------------------------------------------------------|-------------|------------------------------------------------|---|-----|--------|---------------------|-------------|--------------------------------------|-------------|---------------|-----|--------------|------------------|---------|-------|---|---------------------|
|                |                                                         |             |                                                |   |     |        |                     |             | NA                                   |             |               |     |              |                  |         |       |   |                     |
| Lattanzi, 2018 | Epilepsy, all-types seizures                            | CBD         | Somnolence                                     | 4 | 550 | RR     | 2.75 (1.69, 4.48)   | <0.005      | 0.23/<br>NA                          | V           | V             | ↓↓  | V            | V                | x       | M     | H | 2.75 (1.69, 4.48)   |
| Elliott, 2018  | Epilepsy (C)                                            | CBD         | Status epilepticus                             | 3 | 516 | RR     | 1.39 (0.55, 3.47)   | >0.05       | 0.00/<br>NA                          | V           | V             | ↓↓  | V            | V                | x       | M     | H | 1.39 (0.55, 3.47)   |
| Lattanzi, 2018 | Epilepsy, all-types seizures                            | CBD         | Treatment-related adverse event                | 4 | 550 | RR     | 2.16 (1.71, 2.73)   | <0.005      | 0.00/<br>NA                          | V           | V             | ↓↓  | V            | V                | x       | M     | H | 2.16 (1.71, 2.73)   |
| Lattanzi, 2018 | Epilepsy, all-types seizures                            | CBD         | Upper respiratory infection                    | 4 | 516 | RR     | 0.96 (0.56, 1.64)   | >0.05       | 0.09/<br>NA                          | V           | V             | ↓↓  | V            | V                | x       | M     | H | 1.04 (0.61, 1.78)   |
| Lattanzi, 2018 | Epilepsy, all-types seizures                            | CBD         | Vomiting                                       | 4 | 550 | RR     | 0.92 (0.56, 1.51)   | >0.05       | 0.33/<br>NA                          | V           | V             | ↓↓  | V            | V                | x       | M     | H | 1.09 (0.66, 1.79)   |
| Lattanzi, 2018 | Epilepsy, all-types seizures                            | CBD         | Pyrexia                                        | 4 | 550 | RR     | 1.11 (0.69, 1.78)   | >0.05       | 0.23/<br>NA                          | V           | V             | ↓↓  | V            | V                | x       | M     | H | 1.11 (0.69, 1.78)   |
| Lattanzi, 2018 | Lennox-gastaut syndrome (C)                             | CBD         | Acceptability                                  | 2 | 396 | RR     | 5.42 (1.10, 26.76)  | 0.01<p<0.05 | 40.87/<br>0.56                       | ↓↓          | V             | V   | V            | ↓                | +       | L     | M | 5.42 (1.10, 26.76)  |
| Lattanzi, 2018 | Treatment-resistant Dravet syndrome, Lennox-Gastaut (C) | CBD         | Seizure, change in baseline seizures frequency | 3 | 516 | MD     | 17.41 (0.95, 33.88) | 0.01<p<0.05 | 44.55/<br>5.92                       | ↓↓          | V             | V   | V            | ↓                | x       | L     | H | NA, beneficial      |
| Lattanzi, 2018 | Lennox-gastaut syndrome (C)                             | CBD         | Tolerability                                   | 2 | 396 | RR     | 6.60 (1.38, 31.42)  | 0.01<p<0.05 | 14.12/<br>0.18                       | ↓↓          | V             | V   | V            | ↓                | +       | L     | M | 6.60 (1.38, 31.42)  |
| Lattanzi, 2018 | Epilepsy, all-types seizures                            | CBD         | Fatigue                                        | 3 | 325 | RR     | 1.45 (0.20, 10.57)  | >0.05       | 0.74/<br>NA                          | ↓           | V             | ↓↓  | V            | V                | x       | L     | H | 1.45 (0.20, 10.57)  |
| Lattanzi, 2018 | Epilepsy, all-types seizures                            | CBD         | Increased aminotransferases                    | 4 | 550 | RR     | 11.88 (3.77, 37.44) | <0.005      | 0.00/<br>NA                          | ↓           | V             | ↓↓  | V            | V                | x       | L     | M | 11.88 (3.77, 37.44) |
| Lattanzi, 2018 | Epilepsy, all-types seizures                            | CBD         | Sedation                                       | 4 | 205 | RR     | 4.88 (0.92, 25.93)  | >0.05       | 0.00/<br>NA                          | ↓           | V             | ↓↓  | V            | V                | x       | L     | H | 4.88 (0.92, 25.93)  |

| Author, year    | Population                                              | Cannabinoid | Outcome                                     | k | N   | Metric | ES (95% CI)        | p           | I <sup>2</sup> /<br>tau <sup>2</sup> | Imprecision | Inconsistency | RoB | Indirectness | Publication bias | Upgrade | GRADE | Q | eOR (95% CI)       |
|-----------------|---------------------------------------------------------|-------------|---------------------------------------------|---|-----|--------|--------------------|-------------|--------------------------------------|-------------|---------------|-----|--------------|------------------|---------|-------|---|--------------------|
| Stockings, 2018 | Epilepsy (any age)                                      | CBD         | Seizure, complete freedom                   | 3 | 306 | RR     | 6.17 (1.50, 25.32) | 0.01<p<0.05 | 0.00/<br>NA                          | ↓           | V             | ↓↓  | V            | V                | x       | L     | H | 0.16 (0.04, 0.67)  |
| Lattanzi, 2018  | Epilepsy, all-types seizures                            | CBD         | Treatment-related serious adverse event     | 4 | 550 | RR     | 6.93 (1.92, 24.92) | <0.005      | 0.00/<br>NA                          | ↓           | V             | ↓↓  | V            | V                | x       | L     | M | 6.93 (1.92, 24.92) |
| Lattanzi, 2018  | Lennox-gastaut syndrome (C)                             | CBD         | Decreased appetite                          | 2 | 396 | RR     | 3.21 (1.56, 6.60)  | <0.005      | NA/<br>NA                            | V           | ↓↓            | ↓↓  | V            | V                | x       | L     | M | 3.21 (1.56, 6.60)  |
| Lattanzi, 2018  | Treatment-resistant Dravet syndrome, Lennox-Gastaut (C) | CBD         | Diarrhoea                                   | 2 | 396 | RR     | 1.93 (1.05, 3.52)  | 0.01<p<0.05 | NA/<br>NA                            | V           | ↓↓            | ↓↓  | V            | V                | x       | L     | M | 1.93 (1.05, 3.52)  |
| Lattanzi, 2018  | Lennox-gastaut syndrome (C)                             | CBD         | Pyrexia                                     | 2 | 396 | RR     | 0.93 (0.54, 1.61)  | >0.05       | NR/<br>NA                            | V           | ↓↓            | ↓↓  | V            | V                | x       | L     | M | 0.93 (0.54, 1.61)  |
| Lattanzi, 2018  | Lennox-gastaut syndrome (C)                             | CBD         | Somnolence                                  | 2 | 396 | RR     | 2.56 (1.35, 4.83)  | <0.005      | NA/<br>NA                            | V           | ↓↓            | ↓↓  | V            | V                | x       | L     | M | 2.56 (1.35, 4.83)  |
| Lattanzi, 2018  | Lennox-gastaut syndrome (C)                             | CBD         | Upper respiratory infections                | 2 | 396 | RR     | 0.86 (0.46, 1.59)  | >0.05       | NR/<br>NA                            | V           | ↓↓            | ↓↓  | V            | V                | x       | L     | M | 0.86 (0.46, 1.59)  |
| Lattanzi, 2018  | Lennox-gastaut syndrome (C)                             | CBD         | Vomiting                                    | 2 | 396 | RR     | 0.71 (0.41, 1.24)  | >0.05       | NR/<br>NA                            | V           | ↓↓            | ↓↓  | V            | V                | x       | L     | M | 0.71 (0.41, 1.24)  |
| Elliott, 2018   | Epilepsy (C)                                            | CBD         | Vomiting                                    | 4 | 550 | RR     | 1.00 (0.92, 1.96)  | >0.05       | NR/<br>NA                            | V           | ↓↓            | ↓↓  | V            | V                | x       | L     | H | 1.00 (0.92, 1.96)  |
| Lattanzi, 2018  | Epilepsy, all-types seizures                            | CBD         | Withdrawal for any reason                   | 4 | NA  | RR     | 3.54 (1.55, 8.12)  | <0.005      | 0.00/<br>NA                          | ↓↓          | V             | ↓↓  | V            | V                | x       | L     | M | 3.54 (1.55, 8.12)  |
| Lattanzi, 2018  | Lennox-gastaut syndrome (C)                             | CBD         | Seizure, 50% reduction in any seizures      | 1 | 171 | RR     | 1.76 (1.07, 2.88)  | 0.01<p<0.05 | NA/<br>NA                            | ↓           | ↓↓            | ↓↓  | V            | V                | x       | VL    | H | 0.57 (0.35, 0.93)  |
| Lattanzi, 2018  | Lennox-gastaut syndrome (C)                             | CBD         | Seizure, 50% reduction in non-drop seizures | 1 | 156 | RR     | 1.62 (1.09, 2.43)  | 0.01<p<0.05 | NA/<br>NA                            | ↓           | ↓↓            | ↓↓  | V            | V                | x       | VL    | H | 0.62 (0.41, 0.92)  |



| Author, year              | Population                   | Cannabinoid | Outcome                             | k  | N   | Metric | ES (95% CI)          | p      | I <sup>2</sup> /<br>tau <sup>2</sup> | Imprecision | Inconsistency | RoB | Indirectness | Publication bias | Upgrade | GRADE | Q | eOR (95% CI)       |
|---------------------------|------------------------------|-------------|-------------------------------------|----|-----|--------|----------------------|--------|--------------------------------------|-------------|---------------|-----|--------------|------------------|---------|-------|---|--------------------|
| Lattanzi, 2018            | Epilepsy, all-types seizures | CBD         | Withdrawal due to adverse events    | 4  | NR  | RR     | 5.59 (1.67, 16.73)   | <0.005 | NA/<br>NA                            | ↓↓          | ↓↓            | ↓↓  | V            | V                | x       | VL    | M | 5.59 (1.67, 16.73) |
| <b>General population</b> |                              |             |                                     |    |     |        |                      |        |                                      |             |               |     |              |                  |         |       |   |                    |
| Hindley, 2020             | General population (A)       | Cannabis    | Positive symptom                    | 15 | 324 | d      | 0.91 (0.67, 1.15)    | <0.005 | 67.79/<br>0.14                       | V           | V             | V   | V            | ↓                | +       | H     | H | 5.21 (3.36, 8.01)  |
| Hindley, 2020             | General population (A)       | Cannabis    | Total psychiatric symptoms          | 10 | 196 | d      | 1.11 (0.92, 1.29)    | <0.005 | 2.96/<br>0.00                        | ↓           | V             | V   | V            | V                | +       | H     | H | 7.49 (5.31, 10.42) |
| Hindley, 2020             | General population (A)       | Cannabis    | Negative symptom severity           | 13 | 267 | d      | 0.79 (0.58, 0.99)    | <0.005 | 50.50/<br>0.07                       | V           | V             | V   | V            | ↓                | x       | M     | H | 4.19 (2.88, 6.05)  |
| McCartney, 2021           | General population (A)       | THC         | Conflict control                    | 27 | 805 | d      | -0.34 (-0.42, -0.25) | <0.005 | 58.40/<br>NA                         | V           | V             | ↓↓  | V            | V                | x       | M     | L | 1.85 (1.59, 2.16)  |
| McCartney, 2021           | General population (A)       | THC         | Divided attention                   | 22 | 486 | d      | -0.28 (-0.36, -0.20) | <0.005 | 14.20/<br>NA                         | V           | V             | ↓↓  | V            | V                | x       | M     | L | 1.66 (1.43, 1.92)  |
| McCartney, 2021           | General population (A)       | THC         | Fine motor function                 | 12 | 310 | d      | -0.36 (-0.60, -0.12) | <0.005 | 61.90/<br>NA                         | V           | V             | ↓↓  | V            | V                | x       | M     | L | 1.92 (1.24, 2.96)  |
| McCartney, 2021           | General population (A)       | THC         | Fluid intelligence                  | 10 | 346 | d      | -0.37 (-0.46, -0.27) | <0.005 | 16.60/<br>NA                         | V           | V             | ↓↓  | V            | V                | x       | M     | L | 1.95 (1.64, 2.32)  |
| McCartney, 2021           | General population (A)       | THC         | Information processing              | 13 | 290 | d      | -0.38 (-0.55, -0.21) | <0.005 | 23.80/<br>NA                         | V           | V             | ↓↓  | V            | V                | x       | M     | L | 1.99 (1.46, 2.71)  |
| McCartney, 2021           | General population (A)       | THC         | Lateral control                     | 16 | 378 | d      | -0.24 (-0.41, -0.08) | <0.005 | 35.70/<br>NA                         | V           | V             | ↓↓  | V            | V                | x       | M     | L | 1.54 (1.14, 2.08)  |
| McCartney, 2021           | General population (A)       | THC         | Reaction time cognitive domain      | 24 | 647 | d      | -0.28 (-0.43, -0.13) | <0.005 | 53.30/<br>NA                         | V           | V             | ↓↓  | V            | V                | x       | M     | L | 1.66 (1.26, 2.19)  |
| McCartney, 2021           | General population (A)       | THC         | Standard deviation of lane position | 15 | 353 | d      | -0.29 (-0.47, -0.11) | <0.005 | 32.30/<br>NA                         | V           | V             | ↓↓  | V            | V                | x       | M     | L | 1.69 (1.22, 2.34)  |
| McCartney, 2021           | General population (A)       | THC         | Sustained attention                 | 16 | 524 | d      | -0.23 (-0.37, -0.10) | <0.005 | 20.30/<br>NA                         | V           | V             | ↓↓  | V            | V                | x       | M     | L | 1.52 (1.19, 1.94)  |

| Author, year              | Population             | Cannabinoid  | Outcome                              | k  | N    | Metric | ES (95% CI)          | p           | I <sup>2</sup> /<br>tau <sup>2</sup> | Imprecision | Inconsistency | RoB | Indirectness | Publication bias | Upgrade | GRADE | Q | eOR (95% CI)        |
|---------------------------|------------------------|--------------|--------------------------------------|----|------|--------|----------------------|-------------|--------------------------------------|-------------|---------------|-----|--------------|------------------|---------|-------|---|---------------------|
|                           |                        |              |                                      |    |      |        |                      |             | NA                                   |             |               |     |              |                  |         |       |   |                     |
| McCartney, 2021           | General population (A) | THC          | Tracking performance                 | 27 | 606  | d      | -0.42 (-0.58, -0.25) | <0.005      | 64.8/<br>NA                          | V           | V             | ↓↓  | V            | V                | x       | M     | L | 2.14 (1.59, 2.88)   |
| McCartney, 2021           | General population (A) | THC          | Working memory                       | 36 | 800  | d      | -0.36 (-0.52, -0.20) | <0.005      | 69.60/<br>NA                         | V           | V             | ↓↓  | V            | V                | x       | M     | L | 1.92 (1.44, 2.56)   |
| Hindley, 2020             | General population (A) | Cannabis     | General psychiatric symptom severity | 9  | 162  | d      | 1.29 (0.42, 2.17)    | <0.005      | 94.59/<br>1.59                       | ↓           | ↓↓            | V   | V            | ↓                | x       | L     | H | 10.50 (2.15, 51.32) |
| McCartney, 2021           | General population (A) | THC          | Car following headway                | 8  | 124  | d      | -0.03 (-0.32, 0.27)  | >0.05       | 44.40/<br>NA                         | ↓           | V             | ↓↓  | V            | V                | x       | L     | L | 1.05 (0.62, 1.80)   |
| McCartney, 2021           | General population (A) | THC          | Car following headway variability    | 8  | 124  | d      | -0.24 (-0.58, 0.11)  | >0.05       | 37.10/<br>NA                         | ↓           | V             | ↓↓  | V            | V                | x       | L     | L | 1.54 (0.83, 2.83)   |
| McCartney, 2021           | General population (A) | THC          | Reaction time car driving            | 8  | 124  | d      | -0.47 (-0.70, -0.23) | <0.005      | 15.70/<br>NA                         | ↓           | V             | ↓↓  | V            | V                | x       | L     | L | 2.34 (1.53, 3.58)   |
| McCartney, 2021           | General population (A) | THC          | Sensory discrimination               | 5  | 67   | d      | 0.09 (-0.08, 0.25)   | >0.05       | 0.00/<br>NA                          | ↓↓          | V             | ↓↓  | V            | V                | x       | L     | L | 0.85 (0.63, 1.15)   |
| McCartney, 2021           | General population (A) | THC          | Speed variability                    | 10 | 112  | d      | -0.16 (-0.35, 0.02)  | >0.05       | 0.70/<br>NA                          | ↓           | V             | ↓↓  | V            | V                | x       | L     | L | 1.34 (0.96, 1.87)   |
| McCartney, 2021           | General population (A) | THC          | Time perception                      | 6  | 150  | d      | -0.05 (-0.30, 0.20)  | >0.05       | 54.40/<br>NA                         | ↓           | V             | ↓↓  | V            | V                | x       | L     | L | 1.10 (0.69, 1.72)   |
| Sultan, 2017              | General population (A) | CBD, acute   | Heart rate change                    | 7  | NR   | MD     | -1.25 (-3.02, 0.51)  | >0.05       | 0.00/<br>NA                          | ↓↓          | V             | ↓↓  | V            | ↓                | x       | VL    | M | NA                  |
| Sultan, 2017              | General population (A) | CBD, chronic | Heart rate change                    | 5  | NR   | MD     | 0.32 (-4.16, 4.80)   | >0.05       | 64.00/<br>NA                         | ↓↓          | V             | ↓↓  | V            | ↓                | x       | VL    | M | NA                  |
| <b>Multiple sclerosis</b> |                        |              |                                      |    |      |        |                      |             |                                      |             |               |     |              |                  |         |       |   |                     |
| Torres-Moreno, 2018       | Multiple sclerosis (A) | CBM          | Pain reduction                       | 12 | 2692 | d      | -0.19 (-0.34, -0.03) | 0.01<p<0.05 | 61.44/<br>0.04                       | V           | V             | ↓↓  | V            | V                | x       | M     | H | 0.71 (0.53, 0.94)   |

| Author, year        | Population                                       | Cannabinoid  | Outcome                 | k  | N    | Metric | ES (95% CI)          | p            | I <sup>2</sup> /<br>tau <sup>2</sup> | Imprecision | Inconsistency | RoB | Indirectness | Publication bias | Upgrade | GRADE | Q | eOR (95% CI)      |
|---------------------|--------------------------------------------------|--------------|-------------------------|----|------|--------|----------------------|--------------|--------------------------------------|-------------|---------------|-----|--------------|------------------|---------|-------|---|-------------------|
| Torres-Moreno, 2018 | Multiple sclerosis (A)                           | CBM          | Spasticity (subjective) | 12 | 2909 | d      | -0.25 (-0.37, -0.12) | <0.005       | 58.92/<br>0.03                       | V           | V             | ↓↓  | V            | V                | x       | M     | H | 0.63 (0.51, 0.80) |
| Da Rovare, 2017     | Multiple sclerosis, paraplegia (spasticity, A)   | Cannabinoids | Dizziness               | 14 | 2763 | RR     | 3.45 (2.72, 4.37)    | <0.005       | 20.62/<br>0.04                       | V           | V             | ↓↓  | V            | V                | x       | M     | M | 3.45 (2.72, 4.37) |
| Da Rovare, 2017     | Multiple sclerosis, paraplegia (spasticity, A)   | Cannabinoids | Dry mouth               | 10 | 2390 | RR     | 2.82 (2.06, 3.85)    | <0.005       | 0.00/<br>0.00                        | V           | V             | ↓↓  | V            | V                | x       | M     | M | 2.82 (2.06, 3.85) |
| Da Rovare, 2017     | Multiple sclerosis, paraplegia (spasticity, A)   | Cannabinoids | Nausea                  | 11 | 1797 | RR     | 2.24 (1.61, 3.12)    | <0.005       | 0.00/<br>0.00                        | V           | V             | ↓↓  | V            | V                | x       | M     | M | 2.24 (1.61, 3.12) |
| Da Rovare, 2017     | Multiple sclerosis, paraplegia (spasticity, A)   | Cannabinoids | Somnolence              | 11 | 1911 | RR     | 2.90 (1.98, 4.23)    | <0.005       | 0.00/<br>0.00                        | V           | V             | ↓↓  | V            | V                | x       | M     | M | 2.90 (1.98, 4.23) |
| Meza, 2017          | Multiple sclerosis (A)                           | CBM          | Any adverse event       | 4  | 1985 | RR     | 1.18 (1.10, 1.27)    | 0.01<p<0.05  | NA/<br>NA                            | V           | ↓↓            | ↓↓  | V            | V                | x       | L     | L | 1.18 (1.10, 1.27) |
| Torres-Moreno, 2018 | Multiple sclerosis (A)                           | CBM          | Bladder dysfunction     | 8  | 2208 | d      | -0.14 (-0.24, -0.03) | 0.005<p<0.01 | 28.78/<br>0.01                       | V           | V             | ↓↓  | V            | ↓                | x       | L     | H | 0.77 (0.64, 0.94) |
| Torres-Moreno, 2018 | Multiple sclerosis (A)                           | CBM          | Spasticity              | 12 | 1962 | d      | -0.09 (-0.38, 0.00)  | >0.05        | 0.00/<br>NA                          | V           | V             | ↓↓  | V            | ↓                | x       | L     | H | 0.85 (0.60, 1.20) |
| da Rovare, 2017     | Multiple sclerosis or paraplegia (spasticity, A) | Cannabinoids | Daily activities        | 2  | 180  | d      | 0.01 (-1.21, 1.24)   | >0.05        | 0.00/<br>NA                          | V           | V             | ↓↓  | V            | ↓                | x       | L     | M | 0.98 (0.11, 9.02) |
| da Rovare, 2017     | Multiple sclerosis or paraplegia (spasticity, A) | Cannabinoids | Headache                | 12 | 2597 | RR     | 1.10 (0.79, 1.54)    | >0.05        | 7.00/<br>NA                          | V           | V             | ↓↓  | V            | ↓                | x       | L     | M | 1.10 (0.79, 1.54) |
| da Rovare, 2017     | Multiple sclerosis or paraplegia (spasticity, A) | Cannabinoids | Motricity               | 4  | 399  | d      | 0.34 (-0.6, 1.27)    | >0.05        | 0.00/<br>NA                          | V           | V             | ↓↓  | V            | ↓                | x       | L     | M | 0.54 (0.10, 2.93) |
| da Rovare, 2017     | Multiple sclerosis or paraplegia (spasticity, A) | Cannabinoids | Pain reduction          | 2  | 665  | d      | -0.02 (-0.39, 0.35)  | >0.05        | 0.00/<br>NA                          | V           | V             | ↓↓  | V            | ↓                | x       | L     | M | 0.96 (0.49, 1.88) |

| Author, year    | Population                                       | Cannabinoid  | Outcome                                  | k  | N    | Metric | ES (95% CI)         | p           | I <sup>2</sup> /<br>tau <sup>2</sup> | Imprecision | Inconsistency | RoB | Indirectness | Publication bias | Upgrade | GRADE | Q  | eOR (95% CI)          |
|-----------------|--------------------------------------------------|--------------|------------------------------------------|----|------|--------|---------------------|-------------|--------------------------------------|-------------|---------------|-----|--------------|------------------|---------|-------|----|-----------------------|
| da Rovare, 2017 | Multiple sclerosis or paraplegia (spasticity, A) | Cannabinoids | Spasticity reduction                     | 7  | 550  | d      | 0.36 (-0.17, 0.88)  | >0.05       | 88.00/<br>NA                         | V           | ↓             | ↓↓  | V            | ↓                | x       | L     | M  | 0.52 (0.20, 1.35)     |
| da Rovare, 2017 | Multiple sclerosis or paraplegia (spasticity, A) | Cannabinoids | Spasticity reduction, frequency          | 6  | 520  | d      | 0.04 (-0.15, 0.22)  | >0.05       | 2.00/<br>NA                          | V           | V             | ↓↓  | V            | ↓                | x       | L     | M  | 0.93 (0.66, 1.30)     |
| da Rovare, 2017 | Multiple sclerosis or paraplegia (spasticity, A) | Cannabinoids | Spasticity reduction, severity           | 3  | 142  | d      | -0.14 (-0.63, 0.36) | >0.05       | 0.00/<br>NA                          | V           | V             | ↓↓  | V            | ↓                | x       | L     | M  | 0.77 (0.32, 1.90)     |
| da Rovare, 2017 | Multiple sclerosis or paraplegia (spasticity, A) | Cannabinoids | Cognitive overall                        | 3  | 107  | d      | 0.55 (-3.33, 4.43)  | >0.05       | 0.00/<br>NA                          | ↓           | V             | ↓↓  | V            | ↓                | x       | VL    | M  | 2.70 (0.00, 33035.62) |
| Fu, 2018        | Multiple sclerosis (A)                           | CBM          | Non serious adverse events               | 10 | NR   | OR     | 2.77 (1.22, 6.55)   | 0.01<p<0.05 | NA/<br>NA                            | ↓↓          | ↓↓            | ↓↓  | V            | V                | x       | VL    | CL | 2.77 (1.22, 6.55)     |
| <b>Cancer</b>   |                                                  |              |                                          |    |      |        |                     |             |                                      |             |               |     |              |                  |         |       |    |                       |
| Hauser, 2019    | Cancer (A)                                       | CBM          | Daily break-through opioid dosage        | 4  | 971  | d      | -0.11(-0.25, 0.02)  | >0.05       | 7.09/<br>0.01                        | V           | V             | ↓↓  | V            | V                | x       | M     | H  | 0.82 (0.64, 1.05)     |
| Hauser, 2019    | Cancer (A)                                       | CBM          | Gastrointestinal disorder adverse events | 7  | 1330 | RD     | 0.09 (0.01, 0.17)   | 0.01<p<0.05 | 61.66/<br>0.01                       | V           | V             | ↓↓  | V            | V                | x       | M     | H  | NA, harmful           |
| Hauser, 2019    | Cancer (A)                                       | CBM          | Nervous system disorder adverse events   | 7  | 1330 | RD     | 0.10 (0.04, 0.16)   | <0.005      | 49.53/<br>0.00                       | V           | V             | ↓↓  | V            | V                | x       | M     | H  | NA, harmful           |
| Hauser, 2019    | Cancer (A)                                       | CBM          | Pain 30% reduction                       | 7  | 1333 | RD     | 0.03 (-0.03, 0.09)  | >0.05       | 24.93/<br>0.01                       | V           | V             | ↓↓  | V            | V                | x       | M     | H  | NA                    |
| Hauser, 2019    | Cancer (A)                                       | CBM          | Pain 50% reduction                       | 7  | 1333 | RD     | 0.00 (-0.03, 0.04)  | >0.05       | 12.32/<br>70.00                      | V           | V             | ↓↓  | V            | V                | x       | M     | H  | NA                    |
| Hauser, 2019    | Cancer (A)                                       | CBM          | Pain intensity                           | 7  | 1331 | d      | -0.12 (-0.28,0.03)  | >0.05       | 40.70/<br>0.02                       | V           | V             | ↓↓  | V            | V                | x       | M     | H  | 0.81 (0.61, 1.06)     |
| Hauser, 2019    | Cancer (A)                                       | CBM          | Psychiatric disorder                     | 7  | 1330 | RD     | 0.01 (-0.01, 0.03)  | >0.05       | 31.42/<br>0.00                       | V           | V             | ↓↓  | V            | V                | x       | M     | H  | NA                    |

| Author, year       | Population               | Cannabinoid  | Outcome                                         | k  | N    | Metric | ES (95% CI)          | p                 | I <sup>2</sup> /<br>tau <sup>2</sup> | Imprecision | Inconsistency | RoB | Indirectness | Publication bias | Upgrade | GRADE | Q | eOR (95% CI)       |
|--------------------|--------------------------|--------------|-------------------------------------------------|----|------|--------|----------------------|-------------------|--------------------------------------|-------------|---------------|-----|--------------|------------------|---------|-------|---|--------------------|
| Hauser, 2019       | Cancer (A)               | CBM          | Serious adverse events                          | 7  | 1330 | RD     | 1.03 (0.70, 1.35)    | <0.005            | 29.38/<br>0.05                       | V           | V             | ↓↓↓ | V            | V                | x       | M     | H | NA, harmful        |
| Hauser, 2019       | Cancer (A)               | CBM          | Tolerability                                    | 7  | 1332 | RD     | 0.04 (-0.00, 0.09)   | >0.05             | 27.16/<br>0.01                       | V           | V             | ↓↓↓ | V            | V                | x       | M     | H | NA                 |
| Noori, 2021        | Cancer pain on opioids   | CBM          | Nausea                                          | 4  | 1334 | RR     | 1.43 (1.03, 1.96)    | 0.01<p<<br>0.05   | 3.25/<br>0.00                        | V           | V             | ↓↓↓ | V            | V                | x       | M     | L | 1.43 (1.03, 1.96)  |
| Noori, 2021        | Cancer pain on opioids   | CBM          | Sleep disturbances                              | 8  | 2437 | MD     | -0.23 (-0.46, -0.01) | 0.01<p<<br>0.05   | 35.24/<br>0.04                       | V           | V             | ↓↓↓ | V            | V                | x       | M     | L | NA, beneficial     |
| Noori, 2021        | Cancer pain on opioids   | CBM          | Pain relief                                     | 8  | 2437 | MD     | -0.18 (-0.38, 0.02)  | >0.05             | 28.10/<br>NA                         | V           | V             | ↓↓↓ | V            | V                | x       | M     | L | NA                 |
| Noori, 2021        | Cancer pain on opioids   | CBM          | Vomiting                                        | 4  | 1334 | RR     | 1.50 (0.99, 2.27)    | >0.05             | 5.89/0.<br>01                        | V           | V             | ↓↓↓ | V            | V                | x       | M     | L | 1.50 (0.99, 2.27)  |
| Noori, 2021        | Cancer pain on opioids   | CBM          | Constipation                                    | 3  | 1157 | RR     | 0.85 (0.54, 1.35)    | >0.05             | 0.00/<br>NA                          | V           | V             | ↓↓↓ | V            | V                | x       | M     | L | 0.85 (0.54, 1.35)  |
| Hauser, 2019       | Cancer (A)               | CBM          | Daily maintenance opioid dosage                 | 4  | 970  | d      | 0.09 (-0.11, 0.31)   | >0.05             | 55.65/<br>0.02                       | V           | V             | ↓↓↓ | V            | ↓                | x       | L     | H | 1.18 (0.81, 1.72)  |
| Hauser, 2019       | Cancer (A)               | CBM          | Global impression to be much/very much improved | 2  | 710  | RD     | 0.06 (-0.00, 0.12)   | >0.05             | 0.00/<br>0.00                        | V           | V             | ↓↓↓ | V            | ↓                | x       | L     | H | NA                 |
| Hauser, 2019       | Cancer (A)               | CBM          | Sleep problems                                  | 3  | 971  | d      | 0.04 (-0.09, 0.17)   | >0.05             | 0.01/<br>NA                          | V           | V             | ↓↓↓ | ↓            | ↓                | x       | L     | H | 1.08 (0.85, 2.45)  |
| Lobos Urbina, 2016 | Cancer (A)               | Cannabinoids | Any adverse event                               | 29 | 290  | OR     | 3.03 (2.42, 3.80)    | 0.01<p<<br>0.05   | NA/<br>NA                            | V           | ↓↓↓           | ↓↓↓ | V            | V                | x       | L     | L | 3.03 (2.42, 3.80)  |
| Smith, 2015        | Cancer (chemotherapy, A) | CBM          | Dizziness                                       | 9  | 743  | RR     | 3.32 (1.91, 5.79)    | <0.005            | 70.71/<br>0.33                       | V           | V             | ↓↓↓ | ↓            | ↓                | x       | L     | H | 3.32 (1.91, 5.79)  |
| Smith, 2015        | Cancer (chemotherapy, A) | CBM          | Euphoria                                        | 4  | 358  | RR     | 8.80 (1.82, 42.51)   | 0.005<p<<br><0.01 | 13.00/<br>0.33                       | V           | V             | ↓↓↓ | ↓↓↓          | V                | x       | L     | H | 8.80 (1.82, 42.51) |

| Author, year | Population               | Cannabinoid                   | Outcome                         | k  | N    | Metric | ES (95% CI)          | p            | I <sup>2</sup> /<br>tau <sup>2</sup> | Imprecision | Inconsistency | RoB | Indirectness | Publication bias | Upgrade | GRADE | Q | eOR (95% CI)         |
|--------------|--------------------------|-------------------------------|---------------------------------|----|------|--------|----------------------|--------------|--------------------------------------|-------------|---------------|-----|--------------|------------------|---------|-------|---|----------------------|
| Smith, 2015  | Cancer (chemotherapy, A) | CBM vs other antiemetic drugs | Feeling high                    | 5  | 419  | RR     | 5.98 (3.03, 11.78)   | <0.005       | 19.44/<br>0.12                       | V           | V             | ↓↓  | ↓↓           | V                | x       | L     | H | 5.98 (3.03, 11.78)   |
| Smith, 2015  | Cancer (chemotherapy, A) | CBM vs placebo                | Feeling high                    | 3  | 137  | RR     | 31.10 (6.36, 152.05) | <0.005       | 0.16/<br>0.00                        | ↓           | V             | ↓↓  | ↓            | V                | x       | L     | H | 31.10 (6.36, 152.05) |
| Smith, 2015  | Cancer (chemotherapy, A) | CBM vs other antiemetic drugs | Nausea/vomit absence            | 2  | 302  | RR     | 17.98 (2.44, 132.44) | <0.005       | 0.00/<br>0.00                        | V           | V             | ↓↓  | ↓↓           | V                | x       | L     | H | 0.06 (0.01, 0.41)    |
| Smith, 2015  | Cancer (chemotherapy, A) | CBM vs placebo                | Nausea/vomit absence            | 3  | 288  | RR     | 2.94 (1.42, 6.08)    | <0.005       | 40.80/<br>0.17                       | V           | V             | ↓↓  | ↓            | V                | x       | L     | H | 0.34 (0.16, 0.70)    |
| Smith, 2015  | Cancer (chemotherapy, A) | CBM vs placebo                | Participant preference          | 2  | 856  | RR     | 4.78 (1.79, 12.66)   | <0.005       | 66.32/<br>0.35                       | V           | V             | ↓↓  | ↓            | ↓                | x       | L     | H | 0.21 (0.08, 0.55)    |
| Smith, 2015  | Cancer (chemotherapy, A) | CBM                           | Sedation                        | 11 | 1055 | RR     | 1.34 (1.10, 1.63)    | <0.005       | 48.36/<br>0.04                       | V           | V             | ↓↓  | ↓↓           | V                | x       | L     | H | 1.34 (1.10, 1.63)    |
| Smith, 2015  | Cancer (chemotherapy, A) | CBM vs placebo                | Withdrawal due to adverse event | 2  | 276  | RR     | 7.06 (1.78, 27.94)   | 0.005<p<0.01 | 8.73/<br>0.13                        | V           | V             | ↓↓  | ↓            | V                | x       | L     | H | 7.06 (1.78, 27.94)   |
| Mucke, 2018  | Cancer, HIV (A)          | CBM                           | Weight change                   | 3  | 192  | d      | 0.60 (0.18, 1.02)    | <0.005       | 32.33/<br>0.05                       | ↓           | V             | ↓↓  | ↓            | V                | x       | L     | H | 2.97 (1.40, 6.40)    |
| Smith, 2015  | Cancer (chemotherapy, A) | CBM                           | Depression                      | 3  | 317  | RR     | 0.81 (0.51, 1.28)    | >0.05        | 0.00/<br>NA                          | V           | V             | ↓↓  | V            | ↓                | x       | L     | H | 0.81 (0.51, 1.28)    |
| Smith, 2015  | Cancer (chemotherapy, A) | CBM                           | Hallucinations                  | 2  | 144  | RR     | 5.39 (0.66, 43.68)   | >0.05        | 0.00/<br>NA                          | ↓           | V             | ↓↓  | V            | ↓                | x       | L     | H | 5.39 (0.66, 43.68)   |
| Smith, 2015  | Cancer (chemotherapy, A) | CBM vs prochlorperazine       | Nausea/vomit absence            | 4  | 409  | RR     | 2.00 (0.74, 5.38)    | >0.05        | 60.00/<br>NA                         | V           | V             | ↓↓  | V            | ↓                | x       | L     | H | 0.50 (0.18, 1.35)    |
| Smith, 2015  | Cancer (chemotherapy, A) | CBM vs other antiemetic agent | Nausea/vomit absence            | 2  | 116  | RR     | 1.10 (0.70, 1.72)    | >0.05        | 0.00/<br>NA                          | ↓           | V             | ↓↓  | V            | ↓                | x       | L     | H | 0.91 (0.58, 1.43)    |
| Smith, 2015  | Cancer (chemotherapy, A) | CBM                           | Sedation                        | 2  | 139  | RR     | 4.47 (0.35, 57.81)   | >0.05        | 0.72/<br>NA                          | ↓           | V             | ↓↓  | V            | ↓                | x       | L     | H | 4.47 (0.35, 57.81)   |

| Author, year | Population               | Cannabinoid | Outcome                | k | N    | Metric | ES (95% CI)          | p     | I <sup>2</sup> /<br>tau <sup>2</sup> | Imprecision | Inconsistency | RoB | Indirectness | Publication bias | Upgrade | GRADE | Q | eOR (95% CI)      |
|--------------|--------------------------|-------------|------------------------|---|------|--------|----------------------|-------|--------------------------------------|-------------|---------------|-----|--------------|------------------|---------|-------|---|-------------------|
|              |                          |             |                        |   |      |        |                      |       | NA                                   |             |               |     |              |                  |         |       |   |                   |
| Smith, 2015  | Cancer (chemotherapy, A) | CBM         | Vomiting absence       | 4 | 209  | RR     | 1.11 (0.86, 1.44)    | >0.05 | 0.00/<br>NA                          | V           | V             | ↓↓  | V            | ↓                | x       | L     | H | 0.90 (0.69, 1.66) |
| Smith, 2015  | Cancer (chemotherapy, A) | Dronabinol  | Nausea absence         | 2 | 117  | RR     | 2.38 (0.21, 26.91)   | >0.05 | 0.68/<br>NA                          | ↓           | V             | ↓↓  | V            | ↓                | x       | L     | H | 0.42 (0.04, 4.75) |
| Smith, 2015  | Cancer (chemotherapy, A) | Dronabinol  | Nausea/vomit absence   | 3 | 188  | RR     | 1.44 (0.62, 3.31)    | >0.05 | 0.52/<br>NA                          | ↓           | V             | ↓↓  | V            | ↓                | x       | L     | H | 0.69 (0.30, 1.60) |
| Smith, 2015  | Cancer (chemotherapy, A) | Dronabinol  | Vomiting absence       | 2 | 116  | RR     | 1.05 (0.64, 1.71)    | >0.05 | 0.00/<br>NA                          | ↓           | V             | ↓↓  | V            | ↓                | x       | L     | H | 0.95 (0.58, 1.56) |
| Smith, 2015  | Cancer (chemotherapy, A) | Nabilone    | Nausea absence         | 3 | 141  | RR     | 1.41 (0.33, 6.03)    | >0.05 | 0.53/<br>NA                          | ↓           | V             | ↓↓  | V            | ↓                | x       | L     | H | 0.71 (0.17, 3.03) |
| Noori, 2021  | Cancer pain on opioids   | CBM         | Pain reduction         | 5 | 1180 | MD     | -3.43 (-12.66, 5.80) | >0.05 | 40.10/<br>NA                         | ↓           | V             | ↓↓  | V            | V                | x       | L     | L | NA                |
| Mucke, 2018  | Cancer, HIV (A)          | CBM         | Dizziness              | 8 | 823  | RD     | 0.03 (-0.02, 0.08)   | >0.05 | 0.00/<br>NA                          | V           | V             | ↓↓  | ↓            | V                | x       | L     | H | NA                |
| Mucke, 2018  | Cancer, HIV (A)          | CBM         | Mental health symptoms | 9 | 799  | RD     | 0.01 (-0.02, 0.04)   | >0.05 | 0.00/<br>NA                          | V           | V             | ↓↓  | ↓            | V                | x       | L     | H | NA                |
| Mucke, 2018  | Cancer, HIV (A)          | CBM         | Nausea/vomit reduction | 3 | 307  | d      | 0.20 (-0.03, 0.44)   | >0.05 | 0.00/<br>NA                          | V           | V             | ↓↓  | ↓            | V                | x       | L     | H | 0.70 (0.46, 1.07) |
| Mucke, 2018  | Cancer, HIV (A)          | CBM         | Pain 30% reduction     | 5 | 537  | RD     | 0.07 (-0.01, 0.16)   | >0.05 | 0.00/<br>NA                          | V           | V             | ↓↓  | ↓            | V                | x       | L     | H | NA                |
| Mucke, 2018  | Cancer, HIV (A)          | CBM         | Quality of life        | 6 | 570  | d      | 0.00 (-0.19, 0.18)   | >0.05 | 0.00/<br>NA                          | V           | V             | ↓↓  | ↓            | V                | x       | L     | H | 1.00 (0.72, 1.40) |
| Mucke, 2018  | Cancer, HIV (A)          | CBM         | Sleeping disorder      | 3 | 198  | d      | -0.09 (-0.62, 0.43)  | >0.05 | 0.63/<br>NA                          | ↓           | V             | ↓↓  | ↓            | V                | x       | L     | H | 0.85 (0.33, 2.20) |

| Author, year  | Population               | Cannabinoid                   | Outcome                            | k | N   | Metric | ES (95% CI)         | p           | I <sup>2</sup> /<br>tau <sup>2</sup> | Imprecision | Inconsistency | RoB | Indirectness | Publication bias | Upgrade | GRADE | Q | eOR (95% CI)       |
|---------------|--------------------------|-------------------------------|------------------------------------|---|-----|--------|---------------------|-------------|--------------------------------------|-------------|---------------|-----|--------------|------------------|---------|-------|---|--------------------|
| Smith, 2015   | Cancer (chemotherapy, A) | Nabilone                      | Vomiting absence                   | 2 | 93  | RR     | 1.55 (0.39, 6.24)   | >0.05       | 0.35/<br>NA                          | ↓↓          | V             | ↓↓  | V            | ↓                | x       | VL    | H | 0.64 (0.16, 2.58)  |
| Smith, 2015   | Cancer (chemotherapy, A) | Nabilone, dronabinol          | Vomiting absence                   | 3 | 136 | RR     | 2.53 (0.78, 8.17)   | >0.05       | 83.63<br>70.85                       | ↓           | ↓             | ↓↓  | ↓            | V                | x       | VL    | H | 0.40 (0.12, 1.28)  |
| Smith, 2015   | Cancer (chemotherapy, A) | CBM vs other antiemetic drugs | Participant preference             | 9 | 799 | RR     | 2.80 (1.71, 4.58)   | <0.005      | 76.85/<br>0.40                       | V           | ↓             | ↓↓  | ↓↓           | V                | x       | VL    | H | 0.36 (0.22, 0.58)  |
| Smith, 2015   | Cancer (chemotherapy, A) | CBM vs other antiemetic drugs | Withdrawal due to adverse event    | 6 | 740 | RR     | 3.93 (1.29, 11.97)  | 0.01<p<0.05 | 20.01/<br>0.40                       | V           | V             | ↓↓  | ↓↓           | ↓                | x       | VL    | H | 3.93 (1.29, 11.97) |
| Simon. 2022   | Cancer with cachexia (A) | Cannabinoids                  | Appetite                           | 4 | 297 | d      | -0.02 (-1.22, 1.18) | >0.05       | 63.00/<br>NA                         | ↓           | V             | ↓↓  | ↓            | ↓                | x       | VL    | L | 1.04 (0.12, 9.09)  |
| Morales, 2017 | Cancer (chemotherapy, A) | Cannabinoids                  | Any adverse event                  | 3 | 176 | RR     | 1.92 (1.26, 2.91)   | 0.01<p<0.05 | NA/<br>NA                            | ↓           | ↓↓            | ↓↓  | V            | V                | x       | VL    | L | 0.52 (0.34, 0.79)  |
| Smith, 2015   | Cancer (chemotherapy, A) | CBM                           | Dysphoria                          | 3 | 192 | RR     | 7.16 (1.27, 40.37)  | 0.01<p<0.05 | 4.33/<br>0.10                        | ↓           | V             | ↓↓  | ↓↓           | V                | x       | VL    | H | 7.16 (1.27, 40.37) |
| Smith, 2015   | Cancer (chemotherapy, A) | CBM                           | Dysphoria                          | 2 | 96  | RR     | 9.00(0.50,160.59)   | >0.05       | NA/<br>NA                            | ↓           | ↓↓            | ↓↓  | V            | ↓                | x       | VL    | H | 9.00 (0.50,160.59) |
| Smith, 2015   | Cancer (chemotherapy, A) | CBM                           | Hypotension, postural              | 6 | 413 | RR     | 2.40 (0.88, 6.53)   | >0.05       | 0.60/<br>NA                          | ↓           | V             | ↓↓  | V            | ↓                | x       | VL    | H | 2.40 (0.88, 6.53)  |
| Smith, 2015   | Cancer (chemotherapy, A) | CBM vs placebo                | Nausea absence                     | 2 | 96  | RR     | 2.00 (0.19, 20.97)  | >0.05       | NA/<br>NA                            | ↓           | ↓↓            | ↓↓  | V            | ↓                | x       | VL    | H | 0.50 (0.05, 5.25)  |
| Smith, 2015   | Cancer (chemotherapy, A) | CBM vs prochlorperazine       | Nausea absence                     | 5 | 258 | RR     | 1.46 (0.67, 3.15)   | >0.05       | 0.58/<br>NA                          | ↓           | V             | ↓↓  | V            | ↓                | x       | VL    | H | 0.68 (0.32, 1.48)  |
| Smith, 2015   | Cancer (chemotherapy, A) | CBM                           | Withdrawal due to lack of efficacy | 2 | 118 | RR     | 0.97 (0.04, 20.93)  | >0.05       | 0.76/<br>NA                          | ↓           | V             | ↓↓  | ↓            | ↓                | x       | VL    | H | 0.97 (0.04, 20.93) |
| Smith, 2015   | Cancer (chemotherapy, A) | CBM plus other                | Tolerability                       | 2 | 105 | RR     | 6.97 (0.88, 55.19)  | >0.05       | 0.00/<br>NA                          | ↓           | V             | ↓↓  | ↓            | ↓                | x       | VL    | H | 6.97 (0.88, 55.19) |



| Author, year            | Population                | Cannabinoid                     | Outcome                   | k  | N    | Metric | ES (95% CI)         | p            | I <sup>2</sup> /<br>tau <sup>2</sup> | Imprecision | Inconsistency | RoB | Indirectness | Publication bias | Upgrade | GRADE | Q | eOR (95% CI)      |
|-------------------------|---------------------------|---------------------------------|---------------------------|----|------|--------|---------------------|--------------|--------------------------------------|-------------|---------------|-----|--------------|------------------|---------|-------|---|-------------------|
|                         |                           | antiemetic agent                |                           |    |      |        |                     |              | NA                                   |             |               |     |              |                  |         |       |   |                   |
| Smith, 2015             | Cancer (chemotherapy, A)  | CBM plus other antiemetic agent | Vomiting absence          | 2  | 89   | RR     | 1.47 (0.69, 3.13)   | >0.05        | NA/<br>NA                            | ↓           | ↓↓            | ↓   | ↓            | ↓                | x       | VL    | H | 0.68 (0.32, 1.45) |
| Mucke, 2018             | Cancer, HIV (A)           | CBM                             | Appetite                  | 5  | 517  | d      | 0.65 (-0.82, 2.12)  | >0.05        | 0.97/<br>NA                          | ↓           | V             | ↓↓  | ↓            | V                | x       | VL    | H | 0.31 (0.02, 4.41) |
| <b>Mental disorders</b> |                           |                                 |                           |    |      |        |                     |              |                                      |             |               |     |              |                  |         |       |   |                   |
| Black, 2019             | Psychiatric disorders (A) | Cannabinoids                    | Acceptability             | 15 | 2299 | OR     | 1.51 (0.96, 2.36)   | >0.05        | 0.42/<br>NA                          | V           | V             | ↓↓  | ↓            | ↓                | x       | L     | H | 1.51 (0.96, 2.36) |
| Black, 2019             | Psychiatric disorders (A) | Cannabinoids                    | Adverse events            | 2  | 385  | OR     | 1.32 (0.79, 2.20)   | >0.05        | 0.00/<br>NA                          | V           | V             | ↓↓  | ↓            | ↓                | x       | L     | H | 1.32 (0.79, 2.20) |
| Black, 2019             | Psychiatric disorders (A) | Cannabinoids                    | Adverse events, all-cause | 10 | 1495 | OR     | 1.98 (1.20, 3.28)   | 0.005<p<0.01 | 59.51/<br>0.32                       | V           | V             | ↓↓  | ↓            | V                | x       | L     | H | 1.98 (1.20, 3.28) |
| Black, 2019             | Psychiatric disorders (A) | THC/<br>CBD                     | Anxiety symptoms          | 7  | 252  | d      | -0.26 (-0.54,0.02)  | >0.05        | 76.13/<br>0.09                       | V           | ↓             | ↓↓  | ↓            | V                | x       | L     | H | 0.63 (0.38, 1.04) |
| Black, 2019             | Psychiatric disorders (A) | Cannabinoids                    | Cognitive function        | 3  | 150  | d      | -0.01 (-0.33, 0.32) | >0.05        | 0.00/<br>NA                          | ↓           | V             | ↓↓  | V            | ↓                | x       | L     | H | 1.02 (0.56, 1.83) |
| Black, 2019             | Psychiatric disorders (A) | Cannabinoids                    | Depressive symptoms       | 12 | 1656 | d      | -0.04 (-0.20,0.10)  | >0.05        | 67.28/<br>0.04                       | V           | V             | ↓↓  | ↓            | ↓                | x       | L     | H | 0.93 (0.71, 1.22) |
| Black, 2019             | Psychiatric disorders (A) | Cannabinoids                    | Emotional functioning     | 2  | 122  | d      | 0.10 (-0.49, 0.69)  | >0.05        | 0.57/<br>NA                          | ↓           | V             | ↓↓  | V            | ↓                | x       | L     | H | 0.83 (0.29, 2.43) |
| Black, 2019             | Psychiatric disorders (A) | Cannabinoids                    | Negative symptoms         | 2  | 122  | d      | 0.08 (-0.27, 0.44)  | >0.05        | 0.94/<br>0.00                        | ↓           | V             | ↓↓  | ↓            | V                | x       | L     | H | 1.16 (0.61, 2.19) |
| Black, 2019             | Psychiatric disorders (A) | Cannabinoids                    | Positive symptoms         | 2  | 122  | d      | -0.16 (-0.68,0.35)  | >0.05        | 46.94/<br>0.07                       | ↓           | V             | ↓↓  | ↓            | V                | x       | L     | H | 0.75 (0.32, 1.77) |

| Author, year  | Population                | Cannabinoid  | Outcome                                | k  | N    | Metric | ES (95% CI)          | p            | I <sup>2</sup> /<br>tau <sup>2</sup> | Imprecision | Inconsistency | RoB | Indirectness | Publication bias | Upgrade | GRADE | Q | eOR (95% CI)       |
|---------------|---------------------------|--------------|----------------------------------------|----|------|--------|----------------------|--------------|--------------------------------------|-------------|---------------|-----|--------------|------------------|---------|-------|---|--------------------|
| Black, 2019   | Psychiatric disorders (A) | Cannabinoids | Serious adverse events                 | 4  | 954  | OR     | 1.29 (0.94, 1.77)    | >0.05        | 0.00/<br>NA                          | V           | V             | ↓↓↓ | ↓            | ↓                | x       | L     | H | 1.29 (0.94, 1.77)  |
| Black, 2019   | Psychiatric disorders (A) | Cannabinoids | Total symptoms                         | 2  | 122  | d      | 0.05 (-0.50, 0.60)   | >0.05        | 52.03/<br>0.09                       | ↓           | V             | ↓↓↓ | ↓            | V                | x       | L     | H | 1.09 (0.40, 2.96)  |
| Black, 2019   | Psychiatric disorders (A) | Cannabinoids | Withdrawals due to adverse events      | 11 | 1621 | OR     | 2.78 (1.59, 4.86)    | <0.005       | 21.42/<br>0.17                       | V           | V             | ↓↓↓ | ↓            | V                | x       | L     | H | 2.78 (1.59, 4.86)  |
| Kopelli, 2020 | Schizophrenia (A)         | CBD          | Cognition                              | 2  | 121  | d      | 0.09 (-0.27, 0.45)   | >0.05        | 0.00/<br>NA                          | ↓           | V             | ↓↓↓ | ↓            | ↓                | x       | L     | L | 1.18 (0.61, 2.26)  |
| Zhang, 2021   | Schizophrenia (A)         | CBD          | Schizophrenia, PANSS positive symptoms | 2  | 122  | MD     | -1.61 (-2.68, -0.55) | 0.005<p<0.01 | 31.45/<br>0.21                       | ↓           | V             | ↓↓↓ | ↓            | V                | x       | L     | L | NA, beneficial     |
| Black, 2019   | Psychiatric disorders (A) | CBD          | Anxiety symptoms                       | 2  | 44   | d      | -0.87 (-1.96, 0.21)  | >0.05        | 83.44/<br>0.52                       | ↓↓↓         | ↓             | ↓↓↓ | ↓            | ↓                | x       | VL    | H | 0.21 (0.03, 1.47)  |
| Bahji, 2020   | Anxiety (A)               | Cannabinoids | Anxiety symptoms, reduction            | 6  | 80   | d      | -1.76 (-2.46, -1.06) | <0.005       | 58.04/<br>0.44                       | ↓↓↓         | V             | ↓↓↓ | V            | ↓                | x       | VL    | H | 0.04 (0.01, 0.15)  |
| Black, 2019   | Psychiatric disorders (A) | Cannabinoids | Global functioning                     | 2  | 41   | d      | -0.84 (-2.10, 0.42)  | >0.05        | 0.68/<br>NA                          | ↓↓↓         | V             | ↓↓↓ | V            | ↓                | x       | VL    | H | 4.57 (0.47, 44.74) |
| Black., 2019  | Psychiatric disorders (A) | Cannabinoids | Tic or Tourette symptoms               | 2  | 41   | d      | -0.46 (-1.28, 0.35)  | >0.05        | 65.66/<br>0.25                       | ↓↓↓         | V             | ↓↓↓ | ↓            | ↓                | x       | VL    | H | 0.43 (0.10, 1.90)  |
| Black, 2019   | Psychiatric disorders (A) | Cannabinoids | Tolerability                           | 2  | 252  | OR     | 0.56 (0.18, 1.76)    | >0.05        | 3.70/<br>0.04                        | ↓           | V             | ↓↓↓ | ↓↓↓          | V                | x       | VL    | H | 1.78 (0.57, 5.58)  |
| Kopelli, 2020 | Schizophrenia (A)         | CBD          | Schizophrenia symptoms                 | 2  | 122  | d      | -1.07 (-2.64, 0.49)  | >0.05        | 0.00/<br>NA                          | ↓           | V             | ↓↓↓ | ↓            | ↓                | x       | VL    | L | 0.14 (0.01, 2.45)  |
| Zhang, 2021   | Schizophrenia (A)         | CBD          | Schizophrenia, PANSS general scores    | 2  | 122  | MD     | -0.91 (-2.78, 0.96)  | >0.05        | 0.00/<br>NA                          | ↓           | V             | ↓↓↓ | ↓            | ↓                | x       | VL    | L | NA                 |

| Author, year                                         | Population                      | Cannabinoid  | Outcome                                | k  | N    | Metric | ES (95% CI)             | p            | I <sup>2</sup> /<br>tau <sup>2</sup> | Imprecision | Inconsistency | RoB | Indirectness | Publication bias | Upgrade | GRADE | Q  | eOR (95% CI)      |
|------------------------------------------------------|---------------------------------|--------------|----------------------------------------|----|------|--------|-------------------------|--------------|--------------------------------------|-------------|---------------|-----|--------------|------------------|---------|-------|----|-------------------|
| Zhang, 2021                                          | Schizophrenia (A)               | CBD          | Schizophrenia, PANSS negative symptoms | 2  | 122  | MD     | 0.82 (-0.05, 1.69)      | >0.05        | 45.00/NA                             | ↓           | V             | ↓↓↓ | ↓            | ↓                | x       | VL    | L  | NA                |
| <b>Healthy subjects</b>                              |                                 |              |                                        |    |      |        |                         |              |                                      |             |               |     |              |                  |         |       |    |                   |
| De Vita, 2018                                        | Experimental pain, healthy (A)  | Cannabinoids | Pain threshold                         | 18 | 467  | d      | 0.17 (0.05, 0.29)       | 0.005<p<0.01 | 53.14/0.03                           | V           | V             | V   | V            | V                | x       | H     | H  | 0.74 (0.59, 0.91) |
| De Vita, 2018                                        | Experimental pain, healthy (A)  | Cannabinoids | Pain unpleasantness                    | 9  | 244  | d      | 0.28 (0.07, 0.49)       | 0.005<p<0.01 | 62.44/0.06                           | V           | V             | V   | V            | V                | x       | H     | H  | 0.60 (0.41, 0.88) |
| De Vita, 2018                                        | Experimental pain, healthy (A)  | Cannabinoids | Pain intensity                         | 22 | 272  | d      | 0.02 (NA, NA)           | >0.05        | 53.00/NA                             | V           | V             | ↓↓↓ | V            | ↓                | x       | L     | H  | 0.96 (NA, NA)     |
| <b>Inflammatory bowel disease</b>                    |                                 |              |                                        |    |      |        |                         |              |                                      |             |               |     |              |                  |         |       |    |                   |
| Doeve, 2020                                          | Inflammatory bowel disease (A)  | Cannabinoids | Quality of life                        | 5  | 2444 | d      | -0.60 (-0.84, -0.35)    | <0.005       | 36.72/0.03                           | V           | V             | V   | V            | V                | x       | H     | CL | 0.34 (0.22, 0.53) |
| Doeve, 2020                                          | Inflammatory bowel disease (A)  | Cannabis     | Post-treatment disease activity        | 4  | 128  | d      | 0.61 (0.12, 1.09)       | 0.01<p<0.05  | 44.50/0.11                           | ↓           | V             | ↓↓↓ | V            | V                | x       | L     | CL | 0.33 (0.14, 0.80) |
| Couch, 2018                                          | Crohn's (A)                     | CBM          | CDAI reduction                         | 2  | 40   | MD     | -74.97 (-229.81, 79.87) | >0.05        | 75.00/NA                             | ↓↓↓         | ↓             | ↓↓↓ | V            | ↓                | x       | VL    | M  | NA                |
| <b>Dementia, Alzheimer's and Parkinson's disease</b> |                                 |              |                                        |    |      |        |                         |              |                                      |             |               |     |              |                  |         |       |    |                   |
| Bahji, 2020                                          | Dementia (elderlies)            | Cannabinoids | Agitation                              | 9  | 348  | d      | -0.89 (-1.97, 0.17)     | >0.05        | 94.65/2.26                           | V           | ↓↓↓           | ↓↓↓ | ↓            | V                | x       | L     | L  | 0.20 (0.03, 1.38) |
| Bahji, 2020                                          | Dementia (elderlies)            | Cannabinoids | CGI                                    | 9  | 208  | d      | -0.94 (-1.24, -0.64)    | 0.01<p<0.05  | 0.70/NA                              | V           | V             | ↓↓↓ | ↓            | ↓                | x       | L     | L  | 0.18 (0.11, 0.31) |
| Bahji, 2020                                          | Dementia (elderlies)            | Cannabinoids | MMSE                                   | 9  | 208  | d      | 0.42 (0.07, 0.78)       | 0.01<p<0.05  | 0.03/NA                              | V           | V             | ↓↓↓ | ↓            | ↓                | x       | L     | L  | 0.47 (0.25, 0.89) |
| Ruthirakuhan, 2019                                   | Alzheimer's disease (elderlies) | CBM          | Adverse events                         | 6  | 210  | RR     | 1.26 (0.93, 1.71)       | >0.05        | NR/NA                                | V           | ↓↓↓           | ↓↓↓ | V            | V                | x       | L     | H  | 1.26 (0.93, 1.71) |

| Author, year                  | Population                      | Cannabinoid            | Outcome                   | k | N   | Metric | ES (95% CI)          | p           | I <sup>2</sup> /<br>tau <sup>2</sup> | Imprecision | Inconsistency | RoB | Indirectness | Publication bias | Upgrade | GRADE | Q | eOR (95% CI)      |
|-------------------------------|---------------------------------|------------------------|---------------------------|---|-----|--------|----------------------|-------------|--------------------------------------|-------------|---------------|-----|--------------|------------------|---------|-------|---|-------------------|
| Ruthirakuhan, 2019            | Alzheimer's disease (elderlies) | CBM                    | Agitation and aggression  | 7 | 251 | d      | -0.69 (-1.50, 0.13)  | >0.05       | 0.86/<br>NA                          | ↓           | V             | ↓↓  | V            | V                | x       | L     | H | 0.29 (0.07, 1.25) |
| Ruthirakuhan, 2019            | Alzheimer's disease (elderlies) | CBM                    | BMI                       | 3 | 144 | MD     | 0.05 (-0.15, 0.25)   | >0.05       | 0.62/<br>NA                          | ↓           | V             | ↓↓  | V            | V                | x       | L     | H | NA                |
| Ruthirakuhan, 2019            | Alzheimer's disease (elderlies) | CBM                    | Neuropsychiatric symptoms | 6 | 229 | MD     | 0.67 (-2.82, 4.16)   | >0.05       | 0.00/<br>NA                          | ↓           | V             | ↓↓  | V            | V                | x       | L     | H | NA                |
| Ruthirakuhan, 2019            | Alzheimer's disease (elderlies) | CBM                    | Sedation /Somnolence      | 4 | 244 | RR     | 1.73 (1.02, 2.93)    | 0.01<p<0.05 | NA/<br>NA                            | V           | ↓↓            | ↓↓  | V            | V                | x       | L     | H | 1.73 (1.02, 2.93) |
| Ruthirakuhan, 2019            | Alzheimer's disease (elderlies) | CBM                    | Tolerability              | 6 | 152 | RR     | 1.31 (0.34, 5.13)    | >0.05       | NR/<br>NA                            | ↓           | ↓↓            | ↓↓  | V            | V                | x       | VL    | H | 1.31 (0.34, 5.13) |
| Thanabalasingam, 2021         | Parkinson's disease (A)         | Cannabinoids           | Motor function            | 3 | 68  | MD     | -0.21 (-4.15, 3.72)  | >0.05       | 0.00/<br>NA                          | ↓↓          | V             | ↓↓  | V            | ↓                | x       | VL    | L | NA                |
| <b>Substance use disorder</b> |                                 |                        |                           |   |     |        |                      |             |                                      |             |               |     |              |                  |         |       |   |                   |
| McKee, 2021                   | Opioid use disorder (A)         | CBM                    | CUD treatment             | 2 | 52  | d      | -1.28 (-1.89, -0.66) | <0.005      | 3.81/<br>0.01                        | ↓↓          | V             | ↓↓  | V            | V                | x       | L     | L | 0.10 (0.03, 0.30) |
| Rodríguez, 2018               | Cannabis use disorder           | Nabiximols, dronabinol | Abstinence                | 4 | 388 | RR     | 1.14 (0.56, 2.30)    | >0.05       | NR/<br>NA                            | V           | ↓↓            | ↓↓  | V            | V                | x       | L     | L | 0.89 (0.43, 1.78) |
| Rodríguez, 2018               | Cannabis use disorder           | CBM                    | Adverse effects           | 4 | 388 | RR     | 1.15 (0.90, 1.46)    | >0.05       | NR/<br>NA                            | V           | ↓↓            | ↓↓  | V            | V                | x       | L     | L | 1.15 (0.90, 1.46) |
| McKee, 2021                   | Opioid use disorder (A)         | CBM                    | WDS                       | 4 | 156 | d      | -0.21 (-0.52, 0.11)  | >0.05       | 0.00/<br>NA                          | ↓           | V             | ↓↓  | V            | ↓                | x       | L     | L | 0.68 (0.38, 1.21) |
| McKee, 2021                   | Opioid use disorder (A)         | CBM                    | SOWS                      | 2 | 81  | d      | -0.18 (-1.12, 0.76)  | >0.05       | 69.00/<br>NA                         | ↓↓          | V             | ↓↓  | V            | ↓                | x       | VL    | L | 0.72 (0.13, 3.96) |

*Legend. A, adults; BMI, body mass index; C, children; CBM, cannabis-based medications; CDAI, Crohn's disease activity index; CGI, clinical global impression; CI, confidence interval; CL, critically low; CNS, central nervous system; CUD, cannabis use disorder; ES, effect size; H, high; I<sup>2</sup>, percentage of variation across effect sizes that is due to heterogeneity rather than change; tau<sup>2</sup>, tau-squared heterogeneity; IQ –intelligence quotient; K, number of studies for each factor; L, low; LS, largest study with significant effect; LBW– low birth weight; M, moderate; MD, mean difference; MMSE, Mini Mental State Examination; n , number of cases; N, total number of cohort per factor; N, no; NA, not assessable; NR, not reported; NP, not pertinent because the number of observed studies is less than the expected; OR, odds ratio; PANSS, positive and negative symptoms of schizophrenia; Q, quality measured with AMSTAR 2; RR, risk ratio; sign., significant;*

**eTable 5. Finding across meta-analyses of observational studies on health outcomes of cannabis use**

| Source                | Population    | Cannabis                      | Outcome                                             | Sample size |                    | Effect size |                   |                        | Heterogeneity                     | Significance          |         |         | Biases |     | Class and quality of evidence |   |
|-----------------------|---------------|-------------------------------|-----------------------------------------------------|-------------|--------------------|-------------|-------------------|------------------------|-----------------------------------|-----------------------|---------|---------|--------|-----|-------------------------------|---|
| Author, year          | Population    | Cannabinoid specific exposure | Outcome                                             | k           | n/N (prevalence)   | Metric      | eOR (95% CI)      | ES (95% CI)            | I <sup>2</sup> / tau <sup>2</sup> | p                     | PI sign | LS sign | SSE    | ESB | CE/CES                        | Q |
| <b>Pregnant women</b> |               |                               |                                                     |             |                    |             |                   |                        |                                   |                       |         |         |        |     |                               |   |
| Marchand, 2022        | Pregnancy (A) | Marijuana                     | Small for gestational age (unadjusted)              | 6           | 2078/22921 (9.1%)  | RR          | 1.61 (1.41, 1.83) | 1.61 (1.41, 1.83)      | 18.47/0.00                        | 4.1x10 <sup>-13</sup> | Y       | Y       | N      | N   | I/I/NS*                       | L |
| Conner, 2016          | Pregnancy (A) | Marijuana use                 | Low birth weight (unadjusted)                       | 12          | 6204/57438 (10.8%) | RR          | 1.43 (1.27, 1.62) | 1.43 (1.27, 1.62)      | 45.3/0.02                         | 5.8x10 <sup>-9</sup>  | Y       | Y       | N      | N   | I/I/NS*                       | M |
| Conner, 2016          | Pregnancy (A) | Marijuana use                 | Pre-term delivery (unadjusted)                      | 14          | 8060/81326 (9.9%)  | RR          | 1.32 (1.14, 1.54) | 1.32 (1.14, 1.54)      | 64.7/0.04                         | 2.7x10 <sup>-4</sup>  | N       | Y       | N      | N   | III/III                       | M |
| Marchand, 2022        | Pregnancy (A) | Marijuana                     | Neonatal intensive care unit admission (unadjusted) | 6           | 1315/18615 (7.1%)  | RR          | 1.41 (1.15, 1.71) | 1.41 (1.15, 1.71)      | 23.13/0.01                        | 7.2x10 <sup>-4</sup>  | Y       | Y       | N      | Y   | III/III                       | L |
| Marchand, 2022        | Pregnancy (A) | Marijuana                     | Mean birth weight (unadjusted)                      | 10          | NR/18415 (NA)      | MD          | NA, harmful       | -112.3 (-167.2, -57.4) | 70.18/0.47                        | 1.0x10 <sup>-4</sup>  | N       | Y       | N      | N   | IV/III                        | L |
| Conner, 2016          | Pregnancy (A) | Marijuana use                 | Abruption (unadjusted )                             | 5           | NR/22425 (NA)      | OR          | 1.60 (1.28, 2.00) | 1.60 (1.28, 2.00)      | 0.00/NA                           | <0.05                 | NA      | NA      | NA     | NA  | IV/IV                         | M |
| Conner, 2016          | Pregnancy (A) | Marijuana use                 | Low Apgar score (unadjusted)                        | 6           | NR/24295 (NA)      | RR          | 1.26 (1.07,1.49)  | 1.26 (1.07, 1.49)      | 0.00/NA                           | 0.05                  | NA      | NA      | NA     | NA  | IV/IV                         | M |
| Conner, 2016          | Pregnancy (A) | Marijuana use                 | Stillbirth (unadjusted)                             | 2           | NR/13892 (NA)      | OR          | 1.74 (1.03,2.93 ) | 1.74 (1.03, 2.93 )     | 0.16/NA                           | <0.05                 | NA      | NA      | NA     | NA  | IV/IV                         | M |
| Conner, 2016          | Pregnancy (A) | Marijuana use                 | Abruption (adjusted)                                | 2           | NR/NR (NA)         | OR          | 1.35 (0.45, 3.96) | 1.35 (0.45, 3.96)      | 0.00/NA                           | >0.05                 | NA      | NA      | N      | NA  | NS                            | M |
| Conner, 2016          | Pregnancy (A) | Marijuana use                 | Gestational age (unadjusted)                        | 6           | NR/NR (NA)         | MD          | NA (NA)           | -0.10(-0.50,0.30)      | 0.91/NA                           | >0.05                 | NA      | NA      | NA     | NA  | NS                            | M |

| Source                    | Population                  | Cannabis                      | Outcome                              | Sample size |                    | Effect size |                   |                     | Heterogeneity                     | Significance          |         |         | Biases |     | Class and quality of evidence |   |
|---------------------------|-----------------------------|-------------------------------|--------------------------------------|-------------|--------------------|-------------|-------------------|---------------------|-----------------------------------|-----------------------|---------|---------|--------|-----|-------------------------------|---|
| Author, year              | Population                  | Cannabinoid specific exposure | Outcome                              | k           | n/N (prevalence)   | Metric      | eOR (95% CI)      | ES (95% CI)         | I <sup>2</sup> / tau <sup>2</sup> | p                     | Pl sign | LS sign | SSE    | ESB | CE/CES                        | Q |
| Conner, 2016              | Pregnancy (A)               | Marijuana use                 | Low birth weight (adjusted)          | 4           | NR/29773 (NA)      | RR          | 1.15 (0.91, 1.45) | 1.15 (0.91, 1.45)   | 43.59/0.02                        | >0.05                 | N       | N       | N      | N   | NS                            | M |
| Conner, 2016              | Pregnancy (A)               | Marijuana use                 | Non-intensive care unit (unadjusted) | 5           | 6965/57684 (12.1%) | RR          | 1.41 (0.99, 2.00) | 1.41 (0.99, 2.00)   | 0.90/NA                           | >0.05                 | NA      | NA      | NA     | NA  | NS                            | M |
| Conner, 2016              | Pregnancy (A)               | Marijuana use                 | Perinatal death (unadjusted)         | 3           | 272/22243 (1.2%)   | RR          | 1.09 (0.62,1.91)  | 1.09 (0.62,1.91)    | 0.00/NA                           | >0.05                 | NA      | NA      | NA     | NA  | NS                            | M |
| Conner, 2016              | Pregnancy (A)               | Marijuana use                 | Pre-term delivery (adjusted)         | 4           | NR/35139 (NA)      | RR          | 1.16 (0.75, 1.79) | 1.16 (0.75, 1.79)   | 82.62/0.15                        | >0.05                 | N       | N       | N      | Y   | NS                            | M |
| Conner, 2016              | Pregnancy (A)               | Marijuana use                 | SAB (unadjusted )                    | 2           | 1003/3336 (30.1%)  | OR          | 1.10 (0.84,1.44)  | 1.10 (0.84, 1.44)   | 0.00/NA                           | >0.05                 | NA      | NA      | NA     | NA  | NS                            | M |
| Gunn, 2016                | Pregnancy (A)               | Cannabis use                  | Head circumference                   | 6           | NR/2515 (NA)       | MD          | NA (NA)           | -0.31 (-0.75, 0.13) | 97.00/NA                          | >0.05                 | NA      | NA      | NA     | NA  | NS                            | M |
| Gunn, 2016                | Pregnancy (A)               | Cannabis use                  | Maternal anaemia (NR)                | 6           | NR/9868 (NA)       | OR          | 1.20 (0.85, 1.70) | 1.20 (0.85, 1.70)   | 23.06/0.04                        | >0.05                 | N       | Y       | N      | N   | NS                            | M |
| Gunn, 2016                | Pregnancy (A)               | Cannabis use                  | Neonatal length (NR)                 | 6           | NR/2515 (NA)       | MD          | NA (NA)           | -0.10 (-0.65,0.45)  | 59.00/NA                          | >0.05                 | NA      | NA      | NA     | NA  | NS                            | M |
| Ruisch, 2018              | Pregnant women (A)          | Cannabis use                  | Offspring conduct problem (NR)       | 3           | NR/1263 (NA)       | OR          | 1.29 (0.93, 1.80) | 1.29 (0.93, 1.80)   | 0.00/NA                           | >0.05                 | NA      | NA      | Y      | NA  | NS                            | M |
| <b>General population</b> |                             |                               |                                      |             |                    |             |                   |                     |                                   |                       |         |         |        |     |                               |   |
| Kiburi, 2021              | General population (Ado)    | Cannabis                      | Psychosis (NR)                       | 18          | 2512/67684 (3.7%)  | RR          | 1.71 (1.47, 2.00) | 1.71 (1.47, 2.00)   | 68.8/0.06                         | 8.4x10 <sup>-12</sup> | N       | Y       | N      | Y   | II/II/+                       | H |
| Borges, 2016              | General population (Ado, A) | Cannabis heavy use            | Suicide attempt (adjusted)           | 12          | 1066/21956 (4.9%)  | OR          | 3.20 (1.72, 5.94) | 3.20 (1.72, 5.94)   | 92.1/0.97                         | 2.3x10 <sup>-4</sup>  | N       | N       | N      | Y   | III/ III                      | M |

| Source           | Population                               | Cannabis                      | Outcome                                          | Sample size |                   | Effect size |                   |                   | Heterogeneity                     | Significance          |         |         | Biases |     | Class and quality of evidence |   |
|------------------|------------------------------------------|-------------------------------|--------------------------------------------------|-------------|-------------------|-------------|-------------------|-------------------|-----------------------------------|-----------------------|---------|---------|--------|-----|-------------------------------|---|
| Author, year     | Population                               | Cannabinoid specific exposure | Outcome                                          | k           | n/N (prevalence)  | Metric      | eOR (95% CI)      | ES (95% CI)       | I <sup>2</sup> / tau <sup>2</sup> | p                     | PL sign | LS sign | SSE    | ESB | CE/CES                        | Q |
| Moore, 2007      | General population (Ado, A)              | Cannabis most frequent use    | Psychotic symptoms (adjusted)                    | 6           | 1465/59671 (2.4%) | OR          | 2.18 (1.45, 3.27) | 2.18 (1.45, 3.27) | 67.5/0.15                         | 2.0x10 <sup>-4</sup>  | N       | Y       | N      | N   | III/ III                      | M |
| Sultan, 2018     | General population (A)                   | THC                           | Heart rate change (unadjusted)                   | 13          | NR/150 (NA)       | MD          | NA, harmful       | 1.07 (0.73, 1.40) | 1.19/0.00                         | 3.3x10 <sup>-10</sup> | Y       | Y       | Y      | Y   | IV/II                         | M |
| Gibbs, 2015      | General population (A)                   | Cannabis use                  | Mania symptoms (adjusted)                        | 2           | NR/5520 (NA)      | OR          | 3.00 (1.73, 5.23) | 3.00 (1.73, 5.23) | 9.83/0.02                         | 9.2x10 <sup>-5</sup>  | NA      | Y       | NA     | N   | IV/ III                       | M |
| Gurney, 2015     | General population (A <50)               | Cannabis > 10 years use       | Testicular cancer non seminoma (NR)              | 3           | 719/2138 (33.6%)  | OR          | 2.39 (1.47, 3.86) | 2.39 (1.47, 3.86) | 6.65/0.01                         | 4.0x10 <sup>-4</sup>  | N       | Y       | N      | N   | IV/ III                       | M |
| Gurney, 2015     | General population (A <50)               | Cannabis current use          | Testicular cancer non seminoma (NR)              | 2           | 532/1803 (29.5%)  | OR          | 2.20 (1.57, 3.07) | 2.20 (1.57, 3.07) | 10.06/0.01                        | 3.8x10 <sup>-6</sup>  | NA      | Y       | NA     | N   | IV/ III                       | M |
| Gurney, 2015     | General population (A <50)               | Cannabis weekly use           | Testicular cancer non seminoma (NR)              | 3           | 719/2138 (33.6%)  | OR          | 2.82 (1.77, 4.48) | 2.82 (1.77, 4.48) | 24.68/0.04                        | 1.1x10 <sup>-5</sup>  | N       | Y       | N      | N   | IV/ III                       | M |
| Lorenzetti, 2019 | General population (Ado, A)              | Cannabis regular use          | Medial orbitofrontal cortex volume (NR)          | 6           | NR/356 (NA)       | SMD         | 1.72 (1.29, 2.30) | 0.30 (0.14, 0.46) | 56.15/0.02                        | 2.2x10 <sup>-4</sup>  | N       | Y       | N      | Y   | IV/ III                       | H |
| Lorenzetti, 2019 | General population (Ado, A)              | Cannabis regular use          | Total orbitofrontal cortex volume (NR)           | 7           | NR/472 (NA)       | SMD         | 1.63 (1.31, 2.03) | 0.27 (0.15, 0.39) | 42.60/0.01                        | 1.7x10 <sup>-5</sup>  | Y       | Y       | N      | N   | IV/ III                       | H |
| Moore, 2007      | General population (Ado, A)              | Cannabis use                  | Depression (adjusted)                            | 11          | NR/17628 (NA)     | OR          | 1.21 (1.11, 1.31) | 1.21 (1.11, 1.31) | 0.00/0.00                         | 4.6x10 <sup>-6</sup>  | Y       | Y       | N      | N   | IV/ III                       | M |
| Johnson, 2017    | General population (Ado, A)              | Cannabis use                  | Physical dating violence perpetuation (adjusted) | 13          | NR/17356 (NA)     | OR          | 1.45 (1.19, 1.77) | 1.45 (1.19, 1.77) | 75.49/0.09                        | 7.7x10 <sup>-4</sup>  | N       | Y       | N      | N   | IV/ III                       | H |
| Gurney, 2015     | General population (A <50, case-control) | Cannabis, current use         | Any testicular cancer (adjusted)                 | 2           | NR/2138 (NA)      | OR          | 1.62 (1.13, 2.32) | 1.62 (1.13, 2.32) | 0.00/NA                           | 0.05                  | NA      | NA      | NA     | NA  | IV/IV                         | M |



| Source            | Population                               | Cannabis                      | Outcome                                           | Sample size |                  | Effect size |                    |                      | Heterogeneity                     | Significance         |         |         | Biases |     | Class and quality of evidence |   |
|-------------------|------------------------------------------|-------------------------------|---------------------------------------------------|-------------|------------------|-------------|--------------------|----------------------|-----------------------------------|----------------------|---------|---------|--------|-----|-------------------------------|---|
| Author, year      | Population                               | Cannabinoid specific exposure | Outcome                                           | k           | n/N (prevalence) | Metric      | eOR (95% CI)       | ES (95% CI)          | I <sup>2</sup> / tau <sup>2</sup> | p                    | PI sign | LS sign | SSE    | ESB | CE/CES                        | Q |
| Gurney, 2015      | General population (A <50, case-control) | Cannabis, at least weekly use | Any testicular cancer (adjusted)                  | 3           | NR/2138 (NA)     | OR          | 1.92 (1.35, 2.72 ) | 1.92 (1.35, 2.72 )   | 0.00/NA                           | 0.05                 | NA      | NA      | NA     | NA  | IV/IV                         | M |
| Gurney, 2015      | General population (A <50, case-control) | Cannabis, >=10 years          | Any testicular cancer (adjusted)                  | 3           | NR/2138 (NA)     | OR          | 1.50 (1.08, 2.09)  | 1.50 (1.08, 2.09)    | 0.00/NA                           | 0.05                 | NA      | NA      | NA     | NA  | IV/IV                         | M |
| Ghasemiesfe, 2019 | General population (A)                   | Marijuana, >10y               | Non-seminoma testicular cancer (adjusted)         | 3           | 160/782 (20.5%)  | OR          | 1.84 (1.22, 2.76)  | 1.84 (1.22, 2.76)    | 8.93/NA                           | 0.003                | N       | Y       | N      | N   | IV/IV                         | H |
| Ghasemiesfe, 2019 | General population (A)                   | Marijuana, >10y               | TGCT (adjusted)                                   | 3           | 357/1049 (34.1%) | OR          | 1.36 (1.02, 1.82)  | 1.36 (1.02, 1.82)    | 1.95/NA                           | 0.035                | N       | Y       | N      | N   | IV/IV                         | H |
| Grant, 2002       | General population (A)                   | Cannabis                      | Residual forgetting/retrieval (NR)                | 6           | NR/516 (NA)      | d           | 1.63 (1.07, 2.43)  | -0.27 (-0.49,-0.04)  | NR/NA                             | <0.05                | NA      | NA      | NA     | NA  | IV/IV                         | M |
| Grant, 2002       | General population (A)                   | Cannabis                      | Residual learning (NR)                            | 12          | NR/888 (NA)      | d           | 1.55 (1.11, 2.10)  | -0.24 (-0.41,-0.06)  | NR/NA                             | 0.02                 | NA      | NA      | NA     | NA  | IV/IV                         | M |
| Szoke, 2014       | General population (A)                   | Cannabis                      | Schizotypy measure (NR)                           | 10          | NR/5187 (NA)     | d           | 1.46 (1.29, 1.69)  | 0.21 (0.14, 0.29)    | 0.00/NA                           | <0.05                | NA      | NA      | N      | NA  | IV/IV                         | M |
| Johnson, 2017     | General population (Ado and young A)     | Cannabis use                  | Physical dating violence victimization (adjusted) | 6           | NR/23456 (NA)    | OR          | 1.44 (1.08, 1.92)  | 1.44 (1.08, 1.92)    | 54.86/0.06                        | 0.011                | N       | Y       | N      | N   | IV/IV                         | H |
| Escelsior, 2020   | General population (Ado, A)              | Cannabinoids                  | Self-injurious behaviours (unadjusted)            | 9           | NR/19321 (NA)    | OR          | 1.64 (1.16, 2.32)  | 1.64 (1.16, 2.32)    | 53.88/NA                          | 4.6x10 <sup>-3</sup> | N       | N       | Y      | N   | IV/IV                         | L |
| Scott, 2018       | General population (Ado, A)              | Cannabis                      | Abstraction/shifting (NR)                         | 47          | NR/8727 (NA)     | d           | 1.72 (1.44, 2.06)  | -0.30 (-0.40,-0.20)  | NR/NA                             | <0.001               | NA      | NA      | Y      | NA  | IV/IV                         | H |
| Scott, 2018       | General population (Ado, A)              | Cannabis                      | Attention (NR)                                    | 53          | NR/8727 (NA)     | d           | 1.46 (1.24, 1.75)  | -0.21 (-0.31, -0.12) | NR/NA                             | <0.001               | NA      | NA      | Y      | NA  | IV/IV                         | H |

| Source       | Population                  | Cannabis                      | Outcome                                                                                 | Sample size |                  | Effect size |                   |                     | Heterogeneity                     | Significance          |         |         | Biases |     | Class and quality of evidence |   |
|--------------|-----------------------------|-------------------------------|-----------------------------------------------------------------------------------------|-------------|------------------|-------------|-------------------|---------------------|-----------------------------------|-----------------------|---------|---------|--------|-----|-------------------------------|---|
| Author, year | Population                  | Cannabinoid specific exposure | Outcome                                                                                 | k           | n/N (prevalence) | Metric      | eOR (95% CI)      | ES (95% CI)         | I <sup>2</sup> / tau <sup>2</sup> | p                     | PI sign | LS sign | SSE    | ESB | CE/CES                        | Q |
| Scott, 2018  | General population (Ado, A) | Cannabis                      | Delayed memory (NR)                                                                     | 62          | NR/8727 (NA)     | d           | 1.60 (1.34, 1.89) | -0.26 (-0.35,-0.16) | NR/NA                             | <0.001                | NA      | NA      | Y      | NA  | IV/IV                         | H |
| Scott, 2018  | General population (Ado, A) | Cannabis                      | Inhibition memory (NR)                                                                  | 30          | NR/8727 (NA)     | d           | 1.57 (1.26, 1.99) | -0.25 (-0.38,-0.13) | NR/NA                             | <0.001                | NA      | NA      | Y      | NA  | IV/IV                         | H |
| Scott, 2018  | General population (Ado, A) | Cannabis                      | Learning (NR)                                                                           | 60          | NR/8727 (NA)     | d           | 1.82 (1.54, 2.14) | -0.33 (-0.42,-0.24) | NR/NA                             | <0.001                | NA      | NA      | Y      | NA  | IV/IV                         | H |
| Blest, 2018  | General population (Ado, A) | Cannabis                      | Left cuneus extending to ipsilateral superior, middle, and inferior occipital gyri (NR) | 22          | NR/755 (NA)      | SDM-Z       | NA                | -1.66 (NA, NA)      | NR/NA                             | 9.5x10 <sup>-5</sup>  | NA      | NA      | N      | NA  | IV/IV                         | M |
| Blest, 2018  | General population (Ado)    | Cannabis (ACU vs NU)          | Left inferior parietal lobule extending to ipsilateral superior parietal gyrus (NR)     | 5           | NR/204 (NA)      | SDM-Z       | NA                | 1.12 (NA, NA)       | NR/NA                             | 1.38x10 <sup>-3</sup> | NA      | NA      | N      | NA  | IV/IV                         | M |
| Blest, 2018  | General population (Ado, A) | Cannabis (CCU vs ACU)         | Left inferior parietal lobule extending to ipsilateral superior parietal gyrus (NR)     | 22          | NR/459 (NA)      | SDM-Z       | NA                | 1.03 (NA, NA)       | NR/NA                             | 1.97x10 <sup>-3</sup> | NA      | NA      | N      | NA  | IV/IV                         | M |
| Blest, 2018  | General population (Ado, A) | Cannabis                      | Left lingual gyrus extending to ipsilateral middle and superior occipital gyrus (NR)    | 22          | NR/459 (NA)      | SDM-Z       | NA                | 1.23 (NA, NA)       | NR/NA                             | 5.60x10 <sup>-4</sup> | NA      | NA      | N      | NA  | IV/IV                         | M |
| Blest, 2018  | General population (Ado, A) | Cannabis                      | Left medial frontal gyrus extending bilaterally (NR)                                    | 22          | NR/755 (NA)      | SDM-Z       | NA                | 1.62 (NA, NA)       | NR/NA                             | 1.41x10 <sup>-3</sup> | NA      | NA      | N      | NA  | IV/IV                         | M |
| Blest, 2018  | General population (Ado)    | Cannabis (ACU vs NU)          | Left middle frontal gyrus extending to ipsilateral superior frontal gyrus (NR)          | 5           | NR/204 (NA)      | SDM-Z       | NA                | 1.12 (NA, NA)       | NR/NA                             | 1.38x10 <sup>-3</sup> | NA      | NA      | N      | NA  | IV/IV                         | M |
| Blest, 2018  | General population (Ado, A) | Cannabis (CCU vs ACU)         | Left middle frontal gyrus extending to ipsilateral superior frontal gyrus (NR)          | 22          | NR/459 (NA)      | SDM-Z       | NA                | 1.02 (NA, NA)       | NR/NA                             | 2.16x10 <sup>-3</sup> | NA      | NA      | N      | NA  | IV/IV                         | M |

| Source          | Population                  | Cannabis                      | Outcome                                                                                                            | Sample size |                  | Effect size |                   |                      | Heterogeneity                     | Significance          |         |         | Biases |     | Class and quality of evidence |    |
|-----------------|-----------------------------|-------------------------------|--------------------------------------------------------------------------------------------------------------------|-------------|------------------|-------------|-------------------|----------------------|-----------------------------------|-----------------------|---------|---------|--------|-----|-------------------------------|----|
| Author, year    | Population                  | Cannabinoid specific exposure | Outcome                                                                                                            | k           | n/N (prevalence) | Metric      | eOR (95% CI)      | ES (95% CI)          | I <sup>2</sup> / tau <sup>2</sup> | p                     | Pl sign | LS sign | SSE    | ESB | CE/CES                        | Q  |
| Chisini, 2019   | General population (Ado, A) | Cannabis                      | Periodontitis (adjusted)                                                                                           | 4           | NR/4328 (NA)     | PR          | NA                | 1.18 (1.01, 1.38)    | 72.51/0.02                        | 0.038                 | N       | Y       | Y      | N   | IV/IV                         | L  |
| Blest, 2018     | General population (Ado, A) | Cannabis                      | Precuneus extending to ipsilateral postcentral and superior parietal gyri (NR)                                     | 22          | NR/459 (NA)      | SDM-Z       | NA                | 1.22 (NA, NA)        | NR/NA                             | 5.84x10 <sup>-4</sup> | NA      | NA      | N      | NA  | IV/IV                         | M  |
| Myles, 2012     | General population (Ado, A) | Cannabis                      | Psychosis, age of onset (NR)                                                                                       | 46          | NR/8914 (NA)     | d           | 2.07 (1.76, 2.43) | -0.40 (-0.49, -0.31) | 73.00/NA                          | <0.001                | NA      | NA      | Y      | NA  | IV/IV                         | M  |
| Schreiner, 2012 | General population (Ado, A) | Cannabis                      | Residual abstraction (NR)                                                                                          | 33          | NR/1849 (NA)     | d           | 1.46 (1.09, 1.99) | -0.21 (-0.38, -0.05) | 0.31/NA                           | <0.05                 | NA      | NA      | NA     | NA  | IV/IV                         | CL |
| Schreiner, 2012 | General population (Ado, A) | Cannabis                      | Residual attention (NR)                                                                                            | 33          | NR/1849 (NA)     | d           | 1.92 (1.34, 2.76) | -0.36 (-0.56, -0.16) | 0.54/NA                           | 0.001                 | NA      | NA      | NA     | NA  | IV/IV                         | CL |
| Schreiner, 2012 | General population (Ado, A) | Cannabis                      | Residual learning (NR)                                                                                             | 33          | NR/1849 (NA)     | d           | 1.89 (1.31, 2.71) | -0.35 (-0.55, -0.15) | 49.03/NA                          | 0.02                  | NA      | NA      | NA     | NA  | IV/IV                         | CL |
| Schreiner, 2012 | General population (Ado, A) | Cannabis                      | Residual memory (NR)                                                                                               | 33          | NR/1849 (NA)     | d           | 1.57 (1.04, 2.35) | -0.25 (-0.47, -0.02) | 0.69/NA                           | <0.001                | NA      | NA      | NA     | NA  | IV/IV                         | CL |
| Schreiner, 2012 | General population (Ado, A) | Cannabis                      | Residual motor speed (NR)                                                                                          | 33          | NR/1849 (NA)     | d           | 1.85 (1.22, 2.81) | -0.34 (-0.57, -0.11) | 2.49/NA                           | <0.05                 | NA      | NA      | NA     | NA  | IV/IV                         | CL |
| Schreiner, 2012 | General population (Ado, A) | Cannabis                      | Residual verbal/language (NR)                                                                                      | 33          | NR/1849 (NA)     | d           | 1.52 (1.00, 2.34) | -0.23 (-0.47, -0.00) | 53.77/NA                          | 0.02                  | NA      | NA      | NA     | NA  | IV/IV                         | CL |
| Blest, 2018     | General population (Ado, A) | Cannabis                      | Right inferior frontal gyrus (NR)                                                                                  | 5           | NR/204 (NA)      | SDM-Z       | NA                | 1.11 (NA, NA)        | NR/NA                             | 1.51x10 <sup>-3</sup> | NA      | NA      | N      | NA  | IV/IV                         | M  |
| Blest, 2018     | General population (Ado, A) | Cannabis                      | Right inferior parietal lobule extending to ipsilateral inferior parietal, superior parietal and angular gyri (NR) | 22          | NR/459 (NA)      | SDM-Z       | NA                | 1.24 (NA, NA)        | NR/NA                             | 5.01x10 <sup>-4</sup> | NA      | NA      | N      | NA  | IV/IV                         | M  |

| Source       | Population                  | Cannabis                      | Outcome                                                                                         | Sample size |                  | Effect size |                   |                      | Heterogeneity                     | Significance          |         |         | Biases |     | Class and quality of evidence |   |
|--------------|-----------------------------|-------------------------------|-------------------------------------------------------------------------------------------------|-------------|------------------|-------------|-------------------|----------------------|-----------------------------------|-----------------------|---------|---------|--------|-----|-------------------------------|---|
| Author, year | Population                  | Cannabinoid specific exposure | Outcome                                                                                         | k           | n/N (prevalence) | Metric      | eOR (95% CI)      | ES (95% CI)          | I <sup>2</sup> / tau <sup>2</sup> | p                     | PI sign | LS sign | SSE    | ESB | CE/CES                        | Q |
| Blest, 2018  | General population (Ado, A) | Cannabis                      | Right inferior parietal lobule extending to ipsilateral superior parietal and angular gyri (NR) | 5           | NR/204 (NA)      | SDM-Z       | NA                | 1.55 (NA, NA)        | NR/NA                             | 1.36x10 <sup>-4</sup> | NA      | NA      | N      | NA  | IV/IV                         | M |
| Blest, 2018  | General population (Ado, A) | Cannabis                      | Right insula extending to ipsilateral inferior frontal gyrus (NR)                               | 22          | NR/755 (NA)      | SDM-Z       | NA                | 1.94 (NA, NA)        | NR/NA                             | 1.26x10 <sup>-4</sup> | NA      | NA      | N      | NA  | IV/IV                         | M |
| Blest, 2018  | General population (Ado, A) | Cannabis                      | Right middle frontal gyrus extending to ipsilateral inferior frontal gyrus (NR)                 | 4           | NR/755 (NA)      | SDM-Z       | NA                | 1.06 (NA, NA)        | NR/NA                             | 7.34x10 <sup>-4</sup> | NA      | NA      | N      | NA  | IV/IV                         | M |
| Blest, 2018  | General population (Ado, A) | Cannabis                      | Right middle frontal gyrus extending to ipsilateral superior frontal gyrus (NR)                 | 5           | NR/204 (NA)      | SDM-Z       | NA                | 1.16 (NA, NA)        | NR/NA                             | 1.02x10 <sup>-3</sup> | NA      | NA      | N      | NA  | IV/IV                         | M |
| Blest, 2018  | General population (Ado, A) | Cannabis                      | Right middle occipital gyrus                                                                    | 4           | NR/755 (NA)      | SDM-Z       | NA                | 1.21 (NA, NA)        | NR/NA                             | 3.45x10 <sup>-4</sup> | NA      | NA      | N      | NA  | IV/IV                         | M |
| Blest, 2018  | General population (Ado, A) | Cannabis                      | Right middle occipital gyrus extending to ipsilateral superior occipital gyrus and cuneus (NR)  | 5           | NR/204 (NA)      | SDM-Z       | NA                | 1.12 (NA, NA)        | NR/NA                             | 1.38x10 <sup>-3</sup> | NA      | NA      | N      | NA  | IV/IV                         | M |
| Blest, 2018  | General population (Ado, A) | Cannabis                      | Right precentral gyrus (NR)                                                                     | 22          | NR/755 (NA)      | SDM-Z       | NA                | -1.29 (NA, NA)       | NR/NA                             | 1.31x10 <sup>-3</sup> | NA      | NA      | N      | NA  | IV/IV                         | M |
| Blest, 2018  | General population (Ado, A) | Cannabis                      | Right precuneus extending to ipsilateral superior parietal gyrus (NR)                           | 5           | NR/204 (NA)      | SDM-Z       | NA                | 1.17 (NA, NA)        | NR                                | 9.80x10 <sup>-4</sup> | NA      | NA      | N      | NA  | IV/IV                         | M |
| Scott, 2018  | General population (Ado, A) | Cannabis                      | Verbal/language (NR)                                                                            | 21          | NR/NR (NA)       | d           | 1.29 (1.02, 1.66) | -0.14 (-0.28, -0.01) | NR/NA                             | 0.05                  | NA      | NA      | Y      | NA  | IV/IV                         | H |
| Scott, 2018  | General population (Ado, A) | Cannabis                      | Working Memory (NR)                                                                             | 51          | NR/8727 (NA)     | d           | 1.49 (1.26, 1.79) | -0.22 (-0.32, -0.13) | NR/NA                             | <0.001                | NA      | NA      | Y      | NA  | IV/IV                         | H |

| Source            | Population                  | Cannabis                      | Outcome                                      | Sample size |                   | Effect size |                   |                      | Heterogeneity                     | Significance |         |         | Biases |     | Class and quality of evidence |   |
|-------------------|-----------------------------|-------------------------------|----------------------------------------------|-------------|-------------------|-------------|-------------------|----------------------|-----------------------------------|--------------|---------|---------|--------|-----|-------------------------------|---|
| Author, year      | Population                  | Cannabinoid specific exposure | Outcome                                      | k           | n/N (prevalence)  | Metric      | eOR (95% CI)      | ES (95% CI)          | I <sup>2</sup> / tau <sup>2</sup> | p            | Pl sign | LS sign | SSE    | ESB | CE/CES                        | Q |
| Scott, 2018       | General population (Ado, A) | Cannabis use                  | Cognitive specific, speed of processing (NR) | 30          | NR/8727 (NA)      | d           | 1.60 (1.31, 1.99) | -0.26 (-0.38, -0.15) | NA/NA                             | <0.001       | NA      | NA      | NA     | NA  | IV/IV                         | H |
| Schumacher, 2018  | General population (Ado, A) | Cannabis use                  | Condom use (adjusted)                        | 11          | NR/4414 (NA)      | OR          | 1.41 (1.13, 1.78) | 0.71 (0.56, 0.89)    | 11.80/0.02                        | 0.003        | N       | Y       | N      | N   | IV/IV                         | M |
| Rocchetti, 2013   | General population (Ado, A) | Cannabis use                  | Hippocampal volume (unadjusted)              | 12          | NR/520 (NA)       | d           | 2.30 (1.29, 4.04) | -0.46 (-0.77, -0.14) | 68.40/0.21                        | 0.005        | N       | Y       | N      | N   | IV/IV                         | M |
| Moore, 2007       | General population (Ado, A) | Cannabis use                  | Psychosis, symptoms (adjusted)               | 7           | 1490/61485 (2.4%) | OR          | 1.46 (1.09, 1.95) | 1.46 (1.09, 1.95)    | 70.46/0.09                        | 0.011        | N       | Y       | N      | N   | IV/IV                         | M |
| Borges, 2016      | General population (Ado, A) | Cannabis use                  | Suicide attempt (adjusted)                   | 8           | 336/8681 (3.9%)   | OR          | 2.14 (1.26, 3.61) | 2.14 (1.26, 3.61)    | 62.91/0.29                        | 0.004        | N       | N       | Y      | N   | IV/IV                         | M |
| Borges, 2016      | General population (Ado, A) | Cannabis use                  | Suicide ideation (adjusted)                  | 8           | 1737/24455 (7.1%) | OR          | 1.55 (1.09, 2.20) | 1.55 (1.09, 2.20)    | 93.44/0.17                        | 0.015        | N       | N       | Y      | N   | IV/IV                         | M |
| Lev-Ran, 2014     | General population (Ado, A) | Cannabis use, heavy           | Depression (adjusted)                        | 8           | NR/18983 (NA)     | OR          | 1.61 (1.12, 2.31) | 1.61 (1.12, 2.31)    | 63.59/0.15                        | 0.009        | N       | Y       | N      | NA  | IV/IV                         | H |
| Borges, 2016      | General population (Ado, A) | Cannabis use, heavy           | Suicide ideation (adjusted)                  | 7           | 814/7759 (10.5%)  | OR          | 2.54 (1.08, 5.95) | 2.54 (1.08, 5.95)    | 92.59/1.12                        | 0.032        | N       | N       | N      | Y   | IV/IV                         | M |
| Borges, 2016      | General population (Ado, A) | Cannabis use                  | Suicide death (adjusted)                     | 5           | 2051/85742 (2.4%) | OR          | 2.53 (1.35, 4.75) | 2.53 (1.35, 4.75)    | 86.89/0.42                        | 0.004        | N       | N       | Y      | Y   | IV/IV                         | M |
| Ghasemiesfe, 2018 | General population (Ado, A) | Marijuana use                 | Cough (unadjusted)                           | 2           | 153/1158 (13.2%)  | RR          | 2.04 (1.02, 4.06) | 2.04 (1.02, 4.06)    | 0.41/NA                           | 0.043        | NA      | N       | N      | N   | IV/IV                         | H |
| Ghasemiesfe, 2018 | General population (Ado, A) | Marijuana use                 | Sputum production (unadjusted)               | 2           | 126/1234 (10.2%)  | RR          | 3.78 (1.48, 9.64) | 3.78 (1.48, 9.64)    | 33.62/NA                          | 0.006        | NA      | Y       | N      | N   | IV/IV                         | H |

| Source           | Population                               | Cannabis                      | Outcome                                   | Sample size |                  | Effect size |                   |                     | Heterogeneity                     | Significance |         |         | Biases |     | Class and quality of evidence |   |
|------------------|------------------------------------------|-------------------------------|-------------------------------------------|-------------|------------------|-------------|-------------------|---------------------|-----------------------------------|--------------|---------|---------|--------|-----|-------------------------------|---|
| Author, year     | Population                               | Cannabinoid specific exposure | Outcome                                   | k           | n/N (prevalence) | Metric      | eOR (95% CI)      | ES (95% CI)         | I <sup>2</sup> / tau <sup>2</sup> | p            | PI sign | LS sign | SSE    | ESB | CE/CES                        | Q |
| Lorenzetti, 2019 | General population (Ado, A)              | Regular cannabis use          | Hippocampus volume (NR)                   | 16          | NR/1063 (NA)     | d           | 1.31 (1.04, 1.63) | 0.15 ( 0.02, 0.27)  | 73.9/0.04                         | 0.021        | N       | N       | N      | N   | IV/IV                         | H |
| Lorenzetti, 2019 | General population (Ado, A)              | Regular cannabis use          | Lateral orbitofrontal cortex volume (NR)  | 6           | NR/356 (NA)      | d           | 1.44 (1.09, 1.92) | 0.20 (0.05, 0.36)   | 53.96/0.02                        | 0.011        | N       | N       | N      | N   | IV/IV                         | H |
| Gurney, 2015     | General population (A <50, case-control) | Cannabis use, >= 10 year      | Seminoma (NR)                             | 3           | NR/2138 (NA)     | OR          | 1.04 (0.65, 1.64) | 1.04 (0.65, 1.64)   | 0.00/NA                           | >0.05        | NA      | NA      | NA     | NA  | NS                            | M |
| Gurney, 2015     | General population (A <50, case-control) | Cannabis use, current         | Seminoma (NR)                             | 2           | NR/2138 (NA)     | OR          | 1.25 (0.78,1.96)  | 1.25 (0.78,1.96)    | 0.00/NA                           | >0.05        | NA      | NA      | NA     | NA  | NS                            | M |
| Gurney, 2015     | General population (A <50, case-control) | Cannabis use, weekly          | Seminoma (NR)                             | 3           | NR/2138 (NA)     | OR          | 1.27 (0.76,2.10)  | 1.27 (0.76, 2.10)   | 0.00/NA                           | >0.05        | NA      | NA      | NA     | NA  | NS                            | M |
| Kamp, 2018       | General population (A)                   | Cannabis use                  | Brain striatal dopaminergic function (NR) | 5           | NR/132 (NA)      | d           | 1.13 (0.55, 2.34) | -0.07 (-0.47, 0.33) | 26.24/NA                          | >0.05        | NA      | NA      | N      | NA  | NS                            | M |
| Grant, 2002      | General population (A)                   | Cannabis use, chronic         | Residual abstraction/executive (NR)       | 9           | NR/820 (NA)      | d           | 0.76 (0.54, 1.07) | -0.15 (-0.34, 0.04) | NR/NA                             | >0.05        | NA      | NA      | NA     | NA  | NS                            | M |
| Grant, 2002      | General population (A)                   | Cannabis use, chronic         | Residual attention (NR)                   | 12          | NR/884 (NA)      | d           | 0.82 (0.54, 1.24) | -0.11 (-0.34, 0.12) | NR/NA                             | >0.05        | NA      | NA      | NA     | NA  | NS                            | M |
| Grant, 2002      | General population (A)                   | Cannabis use, chronic         | Residual motor (NR)                       | 2           | NR/69 (NA)       | d           | 0.62 (0.18, 1.24) | -0.26 (-0.95, 0.44) | NR/NA                             | >0.05        | NA      | NA      | NA     | NA  | NS                            | M |
| Grant, 2002      | General population (A)                   | Cannabis use, chronic         | Residual perceptual motor (NR)            | 8           | NR/693 (NA)      | d           | 0.89 (0.60, 1.31) | -0.07 (-0.28, 0.15) | NR/NA                             | >0.05        | NA      | NA      | NA     | NA  | NS                            | M |
| Grant, 2002      | General population (A)                   | Cannabis use, chronic         | Residual reaction time (NR)               | 5           | NR/526 (NA)      | d           | 1.02 (0.67, 1.53) | 0.01 (-0.22, 0.23)  | NR/NA                             | >0.05        | NA      | NA      | NA     | NA  | NS                            | M |

| Source            | Population                  | Cannabis                      | Outcome                                                        | Sample size |                  | Effect size |                    |                     | Heterogeneity                     | Significance |         |         | Biases |     | Class and quality of evidence |    |
|-------------------|-----------------------------|-------------------------------|----------------------------------------------------------------|-------------|------------------|-------------|--------------------|---------------------|-----------------------------------|--------------|---------|---------|--------|-----|-------------------------------|----|
| Author, year      | Population                  | Cannabinoid specific exposure | Outcome                                                        | k           | n/N (prevalence) | Metric      | eOR (95% CI)       | ES (95% CI)         | I <sup>2</sup> / tau <sup>2</sup> | p            | PI sign | LS sign | SSE    | ESB | CE/CES                        | Q  |
| Grant, 2002       | General population (A)      | Cannabis use, chronic         | Residual verbal/language (NR)                                  | 5           | NR/468 (NA)      | d           | 0.60 (0.32, 1.11)  | -0.28(-0.62, 0.06)  | NR/NA                             | >0.05        | NA      | NA      | NA     | NA  | NS                            | M  |
| Zhang, 2015       | General population (A)      | Cannabis use, habitual        | Lung cancer (NR)                                               | 6           | 2159/3196        | OR          | 0.95 (0.65,1.37)   | 0.95 (0.65, 1.37)   | 0.00/NA                           | >0.05        | NA      | NA      | NA     | NA  | NS                            | L  |
| Ghasemiesfe, 2019 | General population (A)      | Marijuana, >10y               | Seminoma (adjusted)                                            | 3           | 160/748 (21.4%)  | OR          | 0.94 (0.59, 1.50)  | 0.94 (0.59, 1.50)   | 15.32/0.03                        | >0.05        | N       | N       | N      | N   | NS                            | H  |
| Ghasemiesfe, 2019 | General population (A)      | Marijuana, ever use           | HNSCC (adjusted)                                               | 4           | 696/1976 (35.2%) | OR          | 1.27 (0.88, 1.85)  | 1.27 (0.88, 1.85)   | 50.27/0.07                        | >0.05        | N       | N       | Y      | Y   | NS                            | H  |
| Ghasemiesfe, 2019 | General population (A)      | Marijuana, ever use           | Oral cancer (adjusted)                                         | 2           | 709/2357 (30.0%) | OR          | 1.21 (0.94,1.57)   | 1.21 (0.94,1.57)    | 43.29/0.02                        | >0.05        | NA      | Y       | N      | N   | NS                            | H  |
| Ghasemiesfe, 2019 | General population (A)      | Marijuana, ever use           | TGCT (adjusted)                                                | 3           | 695/2112 (32.9%) | OR          | 1.11 (0.79, 1.56)  | 1.11 (0.79, 1.56)   | 55.98/0.05                        | >0.05        | N       | N       | N      | N   | NS                            | H  |
| Xue, 2021         | General population (Ado, A) | Cannabis                      | Anxiety disorders/symptoms                                     | 7           | NR/40553 (NA)    | OR          | 1.31 (0.96, 1.78)  | 1.31 (0.96, 1.78)   | 70.58/0.10                        | >0.05        | N       | Y       | N      | N   | NS                            | L  |
| Scott, 2018       | General population (Ado, A) | Cannabis                      | Motor speed (NR)                                               | 9           | NR/NR (NA)       | d           | 1.04 (0.77, 1.40)  | -0.02 (-0.22, 0.18) | NR/NA                             | >0.05        | NA      | NA      | Y      | NA  | NS                            | H  |
| Schreiner, 2012   | General population (Ado, A) | Cannabis                      | Residual simple reaction time (NR)                             | 33          | NR/775 (NA)      | d           | 1.66 (0.82, 3.36)  | 0.28 (-0.11, 0.67)  | 63.98/NA                          | >0.05        | NA      | NA      | NA     | NA  | NS                            | CL |
| Smith, 2014       | General population (Ado, A) | Cannabis use                  | Behavioural inhibition, go errors (NR)                         | 2           | NR/744 (NA)      | d           | 0.81 (0.47, 1.86)) | -0.12(-0.41,0.18)   | NR/NA                             | >0.05        | NA      | NA      | NA     | NA  | NS                            | M  |
| Smith, 2014       | General population (Ado, A) | Cannabis use                  | Behavioural inhibition, GO RT (frequent-Go/rare-NoGo task, NR) | 3           | NR/744 (NA)      | d           | 1.25 (0.77, 2.06)  | 0.13 (-0.15, 0.40)  | NR/NA                             | >0.05        | NA      | NA      | NA     | NA  | NS                            | M  |

| Source          | Population                  | Cannabis                      | Outcome                                                             | Sample size |                  | Effect size |                   |                     | Heterogeneity                     | Significance |         |         | Biases |     | Class and quality of evidence |    |
|-----------------|-----------------------------|-------------------------------|---------------------------------------------------------------------|-------------|------------------|-------------|-------------------|---------------------|-----------------------------------|--------------|---------|---------|--------|-----|-------------------------------|----|
| Author, year    | Population                  | Cannabinoid specific exposure | Outcome                                                             | k           | n/N (prevalence) | Metric      | eOR (95% CI)      | ES (95% CI)         | I <sup>2</sup> / tau <sup>2</sup> | p            | PI sign | LS sign | SSE    | ESB | CE/CES                        | Q  |
| Smith, 2014     | General population (Ado, A) | Cannabis use                  | Behavioural inhibition, GO RT (stop-signal task, NR)                | 3           | NR/744 (NA)      | d           | 1.20 (0.72, 2.00) | 0.10 (-0.18, 0.39)  | NR/NA                             | >0.05        | NA      | NA      | NA     | NA  | NS                            | M  |
| Smith, 2014     | General population (Ado, A) | Cannabis use                  | Behavioural inhibition, nogo errors (NR)                            | 5           | NR/744 (NA)      | d           | 1.22 (0.81, 1.86) | 0.11 (-0.12, 0.34)  | NR/NA                             | >0.05        | NA      | NA      | NA     | NA  | NS                            | M  |
| Smith, 2014     | General population (Ado, A) | Cannabis use                  | Behavioural inhibition, SSRT (NR)                                   | 6           | NR/744 (NA)      | d           | 1.01 (0.66, 1.54) | 0.01 (-0.23, 0.24)  | NR/NA                             | >0.05        | NA      | NA      | NA     | NA  | NS                            | M  |
| Schreiner, 2012 | General population (Ado, A) | Cannabis use                  | Residual abstraction/executive function after at least 25 days (NR) | 13          | NR/775 (NA)      | d           | 0.83 (0.59, 1.19) | -0.10 (-0.29, 0.10) | 0.00/NA                           | >0.05        | NA      | NA      | NA     | NA  | NS                            | CL |
| Schreiner, 2012 | General population (Ado, A) | Cannabis use                  | Residual attention effect after at least 25 d (NR)                  | 13          | NR/775 (NA)      | d           | 0.69 (0.41, 1.18) | -0.20(-0.49, 0.09)  | 45.90/NA                          | >0.05        | NA      | NA      | NA     | NA  | NS                            | CL |
| Schreiner, 2012 | General population (Ado, A) | Cannabis use                  | Residual forgetting/retrieval effect after at least 25 d (NR)       | 13          | NR/775 (NA)      | d           | 0.76 (0.54, 1.08) | -0.15 (-0.34, 0.04) | 20.02/NA                          | >0.05        | NA      | NA      | NA     | NA  | NS                            | CL |
| Schreiner, 2012 | General population (Ado, A) | Cannabis use                  | Residual learning effect after at least 25 days (NR)                | 13          | NR/775 (NA)      | d           | 0.75 (0.54, 1.03) | -0.16 (-0.33, 0.02) | 0.00/NA                           | >0.05        | NA      | NA      | NA     | NA  | NS                            | CL |
| Schreiner, 2012 | General population (Ado, A) | Cannabis use                  | Residual motor effect after at least 25 d (NR)                      | 13          | NR/775 (NA)      | d           | 0.71 (0.39, 1.30) | -0.19 (-0.53, 0.14) | 0.00/NA                           | >0.05        | NA      | NA      | NA     | NA  | NS                            | CL |
| Schreiner, 2012 | General population (Ado, A) | Cannabis use                  | Residual perceptual-motor effect (NR)                               | 33          | NR/775 (NA)      | d           | 1.04 (0.77, 1.40) | 0.02 (-0.15, 0.18)  | 1.87/NA                           | >0.05        | NA      | NA      | NA     | NA  | NS                            | CL |
| Schreiner, 2012 | General population (Ado, A) | Cannabis use                  | Residual perceptual-motor effect after at least 25 d (NR)           | 13          | NR/775 (NA)      | d           | 1.18 (0.85, 1.63) | 0.09 (-0.09, 0.27)  | 0.20/NA                           | >0.05        | NA      | NA      | NA     | NA  | NS                            | CL |
| Schreiner, 2012 | General population (Ado, A) | Cannabis use                  | Residual simple reaction time effect after at least 25 d (NR)       | 13          | NR/775 (NA)      | d           | 1.13 (0.69, 1.87) | 0.07 (-0.21, 0.34)  | 0.00/NA                           | >0.05        | NA      | NA      | NA     | NA  | NS                            | CL |



| Source            | Population                  | Cannabis                      | Outcome                                                  | Sample size |                    | Effect size |                    |                     | Heterogeneity                     | Significance |         |         | Biases |     | Class and quality of evidence |    |
|-------------------|-----------------------------|-------------------------------|----------------------------------------------------------|-------------|--------------------|-------------|--------------------|---------------------|-----------------------------------|--------------|---------|---------|--------|-----|-------------------------------|----|
| Author, year      | Population                  | Cannabinoid specific exposure | Outcome                                                  | k           | n/N (prevalence)   | Metric      | eOR (95% CI)       | ES (95% CI)         | I <sup>2</sup> / tau <sup>2</sup> | p            | Pl sign | LS sign | SSE    | ESB | CE/CES                        | Q  |
| Schreiner, 2012   | General population (Ado, A) | Cannabis use                  | Residual verbal/language effect after at least 25 d (NR) | 13          | NR/775 (NA)        | d           | 0.83 (0.57, 1.22)  | -0.10 (-0.31, 0.11) | 0.00/NA                           | >0.05        | NA      | NA      | NA     | NA  | NS                            | CL |
| Scott, 2018       | General population (Ado, A) | Cannabis use                  | Visuospatial performance (NR)                            | 15          | NR/NR (NA)         | d           | 1.07 (0.86, 1.34)  | -0.04 (-0.16, 0.08) | NR/NA                             | >0.05        | NA      | NA      | Y      | NA  | NS                            | H  |
| Scott, 2018       | General population (Ado, A) | Cannabis use, abstinent<72h   | Overall cognition (NR)                                   | 69          | NR/NR (NA)         | d           | NA                 | NR                  | NR/NA                             | >0.05        | NA      | NA      | Y      | NA  | NS                            | H  |
| Scott, 2018       | General population (Ado, A) | Cannabis use, abstinent>72h   | Overall cognition (NR)                                   | 15          | NR/928 (NA)        | d           | 1.15 (0.88, 1.52)  | -0.08 (-0.23, 0.07) | NR/NA                             | >0.05        | NA      | NA      | Y      | NA  | NS                            | H  |
| Scott, 2018       | General population (Ado, A) | Cannabis use, current use     | Overall cognition (NR)                                   | 69          | NR/NR (NA)         | d           | NA (NA)            | NR                  | NR/NA                             | >0.05        | NA      | NA      | Y      | NA  | NS                            | H  |
| Moore, 2007       | General population (Ado, A) | Cannabis use, most frequent   | Depression (adjusted)                                    | 8           | 760 /9010 (8.4%)   | OR          | 1.47 (0.97, 2.21)  | 1.47 (0.97, 2.21)   | 68.78/0.19                        | >0.05        | N       | N       | N      | N   | NS                            | M  |
| Lorenzetti, 2019  | General population (Ado, A) | Cannabis use, regular         | Amygdala volume (NR)                                     | 8           | NR/659 (NA)        | d           | 1.04 (0.78, 1.38)  | 0.02 (-0.14, 0.18)  | 0.75/NA                           | >0.05        | NA      | NA      | Y      | NA  | NS                            | H  |
| Lorenzetti, 2019  | General population (Ado, A) | Cannabis use, regular         | Anterior cingulate cortex volume (NR)                    | 3           | NR/163 (NA)        | d           | 0.95 (0.49, 1.82)  | -0.03(-0.39, 0.33)  | 0.71/NA                           | >0.05        | NA      | NA      | Y      | NA  | NS                            | H  |
| Lorenzetti, 2019  | General population (Ado, A) | Cannabis use, regular         | Caudate volume (NR)                                      | 3           | NR/435 (NA)        | d           | 1.18 (0.74, 1.87)  | 0.09 (-0.17, 0.35)  | 0.85/NA                           | >0.05        | NA      | NA      | Y      | NA  | NS                            | H  |
| Lorenzetti, 2019  | General population (Ado, A) | Cannabis use, regular         | Cerebellum volume (NR)                                   | 5           | NR/327 (NA)        | d           | 3.36 (0.38, 29.24) | 0.67 (-0.53, 1.87)  | 0.99/NA                           | >0.05        | NA      | NA      | Y      | NA  | NS                            | H  |
| de Carvalho, 2015 | General population (Ado, A) | Marijuana use                 | Head and neck cancer (NR)                                | 9           | 5082/11187 (45.4%) | OR          | 1.02 (0.91, 1.14)  | 1.02 (0.91, 1.14)   | 78.95/NA                          | >0.05        | NA      | NA      | NA     | NA  | NS                            | M  |

| Source                                                             | Population                  | Cannabis                      | Outcome                       | Sample size |                  | Effect size |                   |                     | Heterogeneity                     | Significance |         |         | Biases |     | Class and quality of evidence |   |
|--------------------------------------------------------------------|-----------------------------|-------------------------------|-------------------------------|-------------|------------------|-------------|-------------------|---------------------|-----------------------------------|--------------|---------|---------|--------|-----|-------------------------------|---|
| Author, year                                                       | Population                  | Cannabinoid specific exposure | Outcome                       | k           | n/N (prevalence) | Metric      | eOR (95% CI)      | ES (95% CI)         | I <sup>2</sup> / tau <sup>2</sup> | p            | PI sign | LS sign | SSE    | ESB | CE/CES                        | Q |
| Lorenzetti, 2019                                                   | General population (Ado, A) | Regular cannabis use          | Intracranial volume (NR)      | 13          | NR/992 (NA)      | d           | 0.96 (0.75, 1.23) | -0.02(-0.16,0.12)   | 0.76/NA                           | >0.05        | NA      | NA      | Y      | NA  | NS                            | H |
| Lorenzetti, 2019                                                   | General population (Ado, A) | Regular cannabis use          | Nucleus accumbens volume (NR) | 3           | NR/312 (NA)      | d           | 0.76 (0.44, 1.31) | -0.15(-0.45, 0.15)  | 0.85/NA                           | >0.05        | NA      | NA      | Y      | NA  | NS                            | H |
| Lorenzetti, 2019                                                   | General population (Ado, A) | Regular cannabis use          | Parietal cortex volume (NR)   | 2           | NR/90 (NA)       | d           | 1.06 (0.55, 2.03) | 0.03 (-0.33, 0.39)  | 0.64/NA                           | >0.05        | NA      | NA      | Y      | NA  | NS                            | H |
| Lorenzetti, 2019                                                   | General population (Ado, A) | Regular cannabis use          | Prefrontal cortex volume (NR) | 3           | NR/148 (NA)      | d           | 1.10 (0.82, 1.46) | 0.05 (-0.11,0.21)   | 0.00/NA                           | >0.05        | NA      | NA      | Y      | NA  | NS                            | H |
| Lorenzetti, 2019                                                   | General population (Ado, A) | Regular cannabis use          | Putamen volume (NR)           | 3           | NR/181 (NA)      | d           | 0.87 (0.27, 2.75) | -0.08 (-0.72, 0.56) | 0.94/NA                           | >0.05        | NA      | NA      | Y      | NA  | NS                            | H |
| Lorenzetti, 2019                                                   | General population (Ado, A) | Regular cannabis use          | Striatum volume (NR)          | 2           | NR/132 (NA)      | d           | 0.24 (0.05, 1.28) | -0.79 (-1.72, 0.14) | 0.07/NA                           | >0.05        | NA      | NA      | Y      | NA  | NS                            | H |
| Lorenzetti, 2019                                                   | General population (Ado, A) | Regular cannabis use          | Total brain volume (NR)       | 8           | NR/494 (NA)      | d           | 0.91 (0.62, 1.35) | -0.05(-0.27, 0.17)  | 0.82/NA                           | >0.05        | NA      | NA      | Y      | NA  | NS                            | H |
| Lorenzetti, 2019                                                   | General population (Ado, A) | Regular cannabis use          | Total grey matter (NR)        | 6           | NR/358 (NA)      | d           | 1.04 (0.85, 1.26) | 0.02 (-0.09, 0.13)  | 0.11/NA                           | >0.05        | NA      | NA      | Y      | NA  | NS                            | H |
| Lorenzetti, 2019                                                   | General population (Ado, A) | Regular cannabis use          | Total white matter (NR)       | 6           | NR/366 (NA)      | d           | 1.04 (0.86, 1.24) | 0.02 (-0.08, 0.12)  | 0.00/NA                           | >0.05        | NA      | NA      | Y      | NA  | NS                            | H |
| <b>Healthy cannabis users vs non users with cognitive outcomes</b> |                             |                               |                               |             |                  |             |                   |                     |                                   |              |         |         |        |     |                               |   |
| Schoeler, 2016                                                     | Healthy subjects (A)        | Cannabis use                  | Prospective memory (NR)       | 5           | NR/294 (NA)      | d           | 3.43 (2.23, 5.28) | 0.68 (0.44, 0.92)   | 92.51/0.06                        | 1.9x10-8     | N       | Y       | N      | N   | IV/ II                        | L |

| Source                                                                     | Population                  | Cannabis                      | Outcome                                | Sample size |                  | Effect size |                   |                      | Heterogeneity                     | Significance           |         |         | Biases |     | Class and quality of evidence |   |
|----------------------------------------------------------------------------|-----------------------------|-------------------------------|----------------------------------------|-------------|------------------|-------------|-------------------|----------------------|-----------------------------------|------------------------|---------|---------|--------|-----|-------------------------------|---|
| Author, year                                                               | Population                  | Cannabinoid specific exposure | Outcome                                | k           | n/N (prevalence) | Metric      | eOR (95% CI)      | ES (95% CI)          | I <sup>2</sup> / tau <sup>2</sup> | p                      | Pl sign | LS sign | SSE    | ESB | CE/CES                        | Q |
| Schoeler, 2016                                                             | Healthy subjects (A)        | Cannabis use                  | Verbal delayed recall (NR)             | 38          | NR/3368 (NA)     | d           | 1.95 (1.63, 2.34) | 0.37 (0.27, 0.47)    | 98.2/0.09                         | 4.4x10 <sup>-13</sup>  | N       | Y       | Y      | Y   | IV/ II                        | L |
| Schoeler, 2016                                                             | Healthy subjects (A)        | Cannabis use                  | Verbal learning (NR)                   | 41          | NR/3085 (NA)     | d           | 2.03 (1.72, 2.39) | 0.39 (0.30, 0.48)    | 96.2/0.08                         | 1.01x10 <sup>-16</sup> | Y       | Y       | N      | N   | IV/ II                        | L |
| Schoeler, 2016                                                             | Healthy subjects (A)        | Cannabis use                  | Visual immediate recall (NR)           | 2           | NR/89 (NA)       | d           | 3.76 (2.64, 5.34) | -0.73 (-0.93, -0.54) | 37.76/0.01                        | 1.7x10 <sup>-13</sup>  | NA      | Y       | NA     | N   | IV/ II                        | L |
| Schoeler, 2016                                                             | Healthy subjects (A)        | Cannabis use                  | Working memory (NR)                    | 39          | NR/4550 (NA)     | d           | 1.29 (1.14, 1.46) | 0.14 (0.07, 0.21)    | 94.10/0.02                        | 8.5x10 <sup>-5</sup>   | N       | Y       | N      | N   | IV/ III                       | L |
| Schoeler, 2016                                                             | Healthy subjects, (A)       | Cannabis use                  | Verbal immediate recall (NR)           | 40          | NR/3169 (NA)     | d           | 2.10 (1.52, 2.97) | 0.41 (0.23, 0.60)    | 99.60/0.36                        | 1.6x10 <sup>-5</sup>   | N       | Y       | N      | N   | IV/ III                       | L |
| Schoeler, 2016                                                             | Healthy subjects (A)        | Cannabis use                  | Verbal recognition (NR)                | 21          | NR/1485 (NA)     | d           | 1.69 (1.36, 2.07) | 0.29 (0.17, 0.40)    | 95.90/0.07                        | 1.31x10 <sup>-6</sup>  | N       | Y       | N      | N   | IV/ III                       | L |
| Schoeler, 2016                                                             | Healthy subjects (A)        | Cannabis use                  | Visual recognition (NR)                | 9           | NR/485 (NA)      | d           | 2.26 (1.20, 4.35) | 0.45 (0.10, 0.81)    | 98.13/0.29                        | 0.013                  | N       | Y       | N      | N   | IV/IV                         | L |
| <b>Drivers and general population users vs non users with car outcomes</b> |                             |                               |                                        |             |                  |             |                   |                      |                                   |                        |         |         |        |     |                               |   |
| Rogeberg, 2019                                                             | Drivers (A)                 | THC positive                  | Car crash (adjusted)                   | 13          | NR/78025 (NA)    | RR          | 1.27 (1.21, 1.34) | 1.27 (1.21, 1.34)    | 13.35/0.00                        | 1.5x10 <sup>-23</sup>  | Y       | Y       | N      | N   | IV/ I                         | L |
| Rogeberg, 2019                                                             | Drivers (A)                 | THC positive                  | Car crash, culpability (adjusted)      | 13          | NR/78025 (NA)    | RR          | 1.53(1.39, 1.67)  | 1.53 (1.39, 1.67)    | 30.9/0.01                         | 2.9x10 <sup>-19</sup>  | Y       | Y       | N      | N   | IV/ I                         | L |
| Hostiuc, 2018                                                              | General population (Ado, A) | Cannabis use                  | Car death after car crash (unadjusted) | 5           | NR/66705 (NA)    | OR          | 1.72 (1.40, 2.10) | 1.72 (1.40, 2.10)    | 71.49/0.03                        | 1.2x10 <sup>-7</sup>   | N       | Y       | N      | N   | IV/ II                        | M |

| Source                   | Population                  | Cannabis                      | Outcome                                         | Sample size |                   | Effect size |                    |                      | Heterogeneity                     | Significance          |         |         | Biases |     | Class and quality of evidence |   |
|--------------------------|-----------------------------|-------------------------------|-------------------------------------------------|-------------|-------------------|-------------|--------------------|----------------------|-----------------------------------|-----------------------|---------|---------|--------|-----|-------------------------------|---|
| Author, year             | Population                  | Cannabinoid specific exposure | Outcome                                         | k           | n/N (prevalence)  | Metric      | eOR (95% CI)       | ES (95% CI)          | I <sup>2</sup> / tau <sup>2</sup> | p                     | PI sign | LS sign | SSE    | ESB | CE/CES                        | Q |
| Hostiuc, 2018            | General population (Ado, A) | Cannabis use                  | Car unfavourable traffic events (unadjusted)    | 23          | NR/245021 (NA)    | OR          | 1.89 (1.58, 2.26)  | 1.89 (1.58, 2.26)    | 90.0/0.11                         | 4.0x10 <sup>-12</sup> | N       | Y       | Y      | Y   | IV/ II                        | M |
| Hostiuc, 2018            | General population (Ado, A) | Cannabis use                  | Car collision (unadjusted)                      | 6           | NR/82875 (NA)     | OR          | 1.91 (1.34, 2.72)  | 1.91 (1.34, 2.72)    | 82.31/0.14                        | 3.0x10 <sup>-4</sup>  | N       | Y       | Y      | Y   | IV/ III                       | M |
| Hostiuc, 2018            | General population (Ado, A) | Cannabis use                  | Car injury (unadjusted)                         | 12          | NR/95441 (NA)     | OR          | 2.15 (1.42, 3.28)  | 2.15 (1.42, 3.28)    | 82.20/0.39                        | 3.4x10 <sup>-4</sup>  | N       | Y       | N      | N   | IV/ III                       | M |
| Asbridge, 2012           | General population (Ado)    | THC                           | Car crash, deaths/injuries (adjusted)           | 7           | 2365/47641 (4.9%) | OR          | 1.63 (1.02, 2.60)  | 1.63 (1.02, 2.60)    | 88.66/0.28                        | 0.039                 | N       | Y       | N      | N   | IV/IV                         | M |
| <b>Psychosis and UHR</b> |                             |                               |                                                 |             |                   |             |                    |                      |                                   |                       |         |         |        |     |                               |   |
| Schoeler, 2016           | Psychosis (A)               | Cannabis use                  | Working memory (NR)                             | 19          | NR/2468 (NA)      | d           | 1.44 (1.21, 1.71)  | -0.20 (-0.30,-0.11)  | 97.10/0.03                        | 1.1x10 <sup>-5</sup>  | N       | Y       | N      | N   | IV/ III                       | L |
| Schoeler, 2016           | Psychosis (A)               | Cannabis continued use        | Psychosis relapse (NR)                          | 24          | NR/16257 (NA)     | d           | 1.88 (1.34, 2.71)  | 0.35 (0.16, 0.55)    | 92.27/0.19                        | 3.1x10 <sup>-4</sup>  | N       | Y       | N      | N   | IV/ III                       | M |
| Bogaty, 2018             | Psychosis (Ado, A)          | Cannabis current use          | Premorbid IQ (unadjusted)                       | 7           | NR/515 (NA)       | d           | 1.99 (1.34, 2.96)  | -0.38 (-0.60, -0.16) | 18.63/0.02                        | 5.0x10 <sup>-4</sup>  | N       | Y       | N      | N   | IV/ III                       | M |
| Foglia, 2017             | Psychosis (Ado, A)          | Cannabis current use vs none  | Adherence to antipsychotic treatment (adjusted) | 3           | NR/259 (NA)       | OR          | 5.78 (2.68, 12.46) | 5.78 (2.68, 12.46)   | 14.61/0.07                        | 7.4x10 <sup>-6</sup>  | N       | Y       | N      | N   | IV/III                        | H |
| Foglia, 2017             | Psychosis (Ado, A)          | Cannabis use                  | Adherence to antipsychotic treatment (adjusted) | 11          | NR/3055 (NA)      | OR          | 2.46 (1.97, 3.07)  | 2.46 (1.97, 3.07)    | 0.00/0.00                         | 2.2x10 <sup>-15</sup> | Y       | N       | N      | Y   | IV/ III                       | H |
| Schoeler, 2016           | Psychosis (A)               | Cannabis use, continued       | Psychosis, hospital length (NR)                 | 5           | NR/803 (NA)       | d           | 1.89 (1.14, 3.13)  | 0.35 (0.07, 0.63)    | 58.44/0.06                        | 0.013                 | N       | N       | N      | N   | IV/IV                         | M |
| Schoeler, 2016           | Psychosis                   | Cannabis use, continued       | Psychosis, positive symptoms (NR)               | 10          | NR/1224 (NA)      | d           | 1.31 (1.00, 1.72)  | 0.15 (0.00, 0.30)    | 24.70/0.01                        | 0.049                 | N       | N       | N      | N   | IV/IV                         | M |

| Source         | Population                            | Cannabis                      | Outcome                             | Sample size |                  | Effect size |                    |                      | Heterogeneity                     | Significance |         |         | Biases |     | Class and quality of evidence |   |
|----------------|---------------------------------------|-------------------------------|-------------------------------------|-------------|------------------|-------------|--------------------|----------------------|-----------------------------------|--------------|---------|---------|--------|-----|-------------------------------|---|
| Author, year   | Population                            | Cannabinoid specific exposure | Outcome                             | k           | n/N (prevalence) | Metric      | eOR (95% CI)       | ES (95% CI)          | I <sup>2</sup> / tau <sup>2</sup> | p            | PI sign | LS sign | SSE    | ESB | CE/CES                        | Q |
| Schoeler, 2016 | Psychosis                             | Cannabis use, continued       | Psychosis, relapse (NR)             | 6           | NR/884 (NA)      | d           | 1.76 (1.09, 2.76)  | 0.31 (0.05, 0.56)    | 61.30/0.07                        | 0.017        | N       | Y       | N      | Y   | IV/IV                         | M |
| Schoeler, 2016 | Psychosis                             | Cannabis use, discontinued    | Psychosis, relapse (NR)             | 6           | NR/884 (NA)      | d           | 1.69 (1.11, 2.61)  | 0.29 (0.06, 0.53)    | 31.56/0.03                        | 0.020        | Y       | Y       | N      | N   | IV/IV                         | M |
| Bogaty, 2018   | Psychosis (Ado, A)                    | Cannabis use                  | Verbal learning (NR)                | 8           | NR/1153 (NA)     | d           | 2.03 (1.82, 2.26)  | -0.39(-0.45,-0.33)   | 89.0NA                            | <0.05        | NA      | NA      | N      | NA  | IV/IV                         | M |
| Bogaty, 2018   | Psychosis (Ado, A)                    | Cannabis, current use         | Working memory (verbal, unadjusted) | 6           | NR/703 (NA)      | d           | 4.11 (1.06, 16.04) | -0.78 (-1.53, -0.03) | 96.03/0.83                        | 0.041        | N       | N       | Y      | N   | IV/IV                         | M |
| Sabe, 2020     | Schizophrenia (A)                     | Cannabis use                  | Negative symptoms (unadjusted)      | 7           | NR/760 (NA)      | d           | 1.89 (1.22, 2.97)  | -0.35 (-0.60, -0.11) | 47.95/0.05                        | 0.005        | N       | N       | N      | N   | IV/IV                         | H |
| Kraan, 2016    | Ultra-high risk of psychosis (Ado, A) | Cannabis (abuse/dependence)   | Psychosis (NR)                      | 5           | NR/1230 (NA)     | OR          | 1.75 (1.14, 2.71)  | 1.75 (1.14, 2.71)    | 0.00/NA                           | 0.011        | NA      | NA      | Y      | NA  | IV/IV                         | H |
| Burns, 2012    | First episode psychosis (Ado, A)      | Cannabis use                  | Psychosis, duration untreated (NR)  | 9           | 447/1214 (36.8%) | d           | 1.22 (0.91, 1.66)  | -0.11 (-0.28, 0.05)  | 58.28/NA                          | >0.05        | NA      | NA      | N      | NA  | NS                            | L |
| Sánchez, 2019  | First-episode psychosis (Ado, A)      | Cannabis use                  | Attention (NR)                      | 3           | NR/318 (NA)      | d           | 0.46 (0.01, 14.65) | -0.43 (-2.34, 1.48)  | NR/NA                             | >0.05        | NA      | NA      | N      | NA  | NS                            | L |
| Sánchez, 2019  | First-episode psychosis (Ado, A)      | Cannabis use                  | Executive function (NR)             | 6           | NR/634 (NA)      | d           | 2.86 (0.69, 11.78) | 0.58 (-0.20, 1.36)   | NR/NA                             | >0.05        | NA      | NA      | N      | NA  | NS                            | L |
| Sánchez, 2019  | First-episode psychosis (Ado, A)      | Cannabis use                  | Premorbid IQ (NR)                   | 4           | NR/420 (NA)      | d           | 2.03 (0.48, 8.50)  | 0.39 (-0.40, 1.18)   | NR/NA                             | >0.05        | NA      | NA      | N      | NA  | NS                            | L |
| Sánchez, 2019  | First-episode psychosis (Ado, A)      | Cannabis use                  | Overall cognition (NR)              | 7           | NR/673 (NA)      | d           | 0.89 (0.45, 1.78)  | -0.06 (-0.44, 0.32)  | NR/NA                             | >0.05        | NA      | NA      | N      | NA  | NS                            | L |

| Source         | Population                       | Cannabis                      | Outcome                         | Sample size |                  | Effect size |                     |                     | Heterogeneity                     | Significance |         |         | Biases |     | Class and quality of evidence |   |
|----------------|----------------------------------|-------------------------------|---------------------------------|-------------|------------------|-------------|---------------------|---------------------|-----------------------------------|--------------|---------|---------|--------|-----|-------------------------------|---|
| Author, year   | Population                       | Cannabinoid specific exposure | Outcome                         | k           | n/N (prevalence) | Metric      | eOR (95% CI)        | ES (95% CI)         | I <sup>2</sup> / tau <sup>2</sup> | p            | PI sign | LS sign | SSE    | ESB | CE/CES                        | Q |
| Sánchez, 2019  | First-episode psychosis (Ado, A) | Cannabis use                  | Processing speed (NR)           | 2           | NR/189 (NA)      | d           | 2.61 (0.01, 1634.6) | 0.53 (-3.03, 4.09)  | NR/NA                             | >0.05        | NA      | NA      | N      | NA  | NS                            | L |
| Sánchez, 2019  | First-episode psychosis (Ado, A) | Cannabis use                  | Verbal memory and learning (NR) | 5           | NR/435 (NA)      | d           | 0.95 (0.46, 1.93)   | -0.03(-0.42, 0.36)  | NR/NA                             | >0.05        | NA      | NA      | N      | NA  | NS                            | L |
| Sánchez, 2019  | First-episode psychosis (Ado, A) | Cannabis use                  | Visual memory (NR)              | 3           | NR/228 (NA)      | d           | 0.57 (0.08, 3.89)   | -0.31(-1.37, 0.75)  | NR/NA                             | >0.05        | NA      | NA      | N      | NA  | NS                            | L |
| Sánchez, 2019  | First-episode psychosis (Ado, A) | Cannabis use                  | Working memory (NR)             | 6           | NR/634 (NA)      | d           | 0.79 (0.20, 3.14)   | -0.13(-0.89, 0.63)  | NR/NA                             | >0.05        | NA      | NA      | N      | NA  | NS                            | L |
| Schoeler, 2016 | Psychosis (A)                    | Cannabis use                  | Verbal delayed recall (NR)      | 11          | NR/1433 (NA)     | d           | 0.77 (0.47, 1.26)   | -0.14 (-0.41, 0.13) | 72.0/NA                           | >0.05        | NA      | NA      | N      | NA  | NS                            | L |
| Schoeler, 2016 | Psychosis (A)                    | Cannabis use                  | Verbal immediate recall (NR)    | 6           | NR/1146 (NA)     | d           | 1.24 (0.65, 2.36)   | 0.12 (-0.24, 0.48)  | 72.1/NA                           | >0.05        | NA      | NA      | N      | NA  | NS                            | L |
| Schoeler, 2016 | Psychosis (A)                    | Cannabis use                  | Verbal learning (NR)            | 14          | NR/2101 (NA)     | d           | 1.22 (0.73, 2.03)   | 0.11 (-0.17, 0.39)  | 72.2/NA                           | >0.05        | NA      | NA      | N      | NA  | NS                            | L |
| Schoeler, 2016 | Psychosis (A)                    | Cannabis use                  | Visual delayed recall (NR)      | 14          | NR/783 (NA)      | d           | 1.18 (0.83, 1.68)   | 0.09 (-0.11, 0.29)  | 72.3/NA                           | >0.05        | NA      | NA      | N      | NA  | NS                            | L |
| Schoeler, 2016 | Psychosis (A)                    | Cannabis use                  | Visual immediate recall (NR)    | 19          | NR/3164 (NA)     | d           | 1.11 (0.93, 1.34)   | 0.06 (-0.04, 0.16)  | 72.4/NA                           | >0.05        | NA      | NA      | N      | NA  | NS                            | L |
| Schoeler, 2016 | Psychosis (A)                    | Cannabis use                  | Visual learning (NR)            | 2           | NR/143 (NA)      | d           | 0.83 (0.46, 1.52)   | -0.10 (-0.43, 0.23) | 72.6/NA                           | >0.05        | NA      | NA      | N      | NA  | NS                            | L |
| Schoeler, 2016 | Psychosis (A)                    | Cannabis use                  | Visual working memory (NR)      | 7           | NR/454 (NA)      | d           | 0.96 (0.63, 1.47)   | -0.02 (-0.26, 0.22) | 72.7/NA                           | >0.05        | NA      | NA      | N      | NA  | NS                            | L |

| Source         | Population         | Cannabis                        | Outcome                                   | Sample size |                  | Effect size |                    |                     | Heterogeneity                     | Significance |         |         | Biases |     | Class and quality of evidence |   |
|----------------|--------------------|---------------------------------|-------------------------------------------|-------------|------------------|-------------|--------------------|---------------------|-----------------------------------|--------------|---------|---------|--------|-----|-------------------------------|---|
| Author, year   | Population         | Cannabinoid specific exposure   | Outcome                                   | k           | n/N (prevalence) | Metric      | eOR (95% CI)       | ES (95% CI)         | I <sup>2</sup> / tau <sup>2</sup> | p            | PI sign | LS sign | SSE    | ESB | CE/CES                        | Q |
| Schoeler, 2016 | Psychosis (A)      | Cannabis use, continued         | Psychosis, functioning (NR)               | 9           | NR/1198 (NA)     | d           | 1.08 (0.75, 1.54)  | 0.04 (-0.16, 0.24)  | 56.27/0.05                        | >0.05        | N       | N       | N      | N   | NS                            | M |
| Schoeler, 2016 | Psychosis (A)      | Cannabis use, continued         | Psychosis, negative symptoms (NR)         | 10          | NR/1202 (NA)     | d           | 1.20 (0.82, 1.72)  | -0.10 (-0.30, 0.11) | 54.90/0.05                        | >0.05        | N       | Y       | N      | N   | NS                            | M |
| Ruiz, 2012     | Psychosis (Ado, A) | Cannabis use                    | Neurological soft signs (NR)              | 2           | NR/142 (NA)      | d           | 2.30 (0.89, 5.93)  | 0.46 (-0.06, 0.98)  | 55.00/NA                          | >0.05        | NA      | NA      | N      | NA  | NS                            | M |
| Foglia, 2017   | Psychosis (Ado, A) | Cannabis use, current vs former | Adherence to antipsychotic treatment (NR) | 4           | NR/404 (NA)      | OR          | 1.81 (0.25, 13.17) | 1.81 (0.25, 13.17)  | 88.0/NA                           | >0.05        | NA      | NA      | N      | NA  | NS                            | H |
| Foglia, 2017   | Psychosis (Ado, A) | Cannabis use, former            | Adherence to antipsychotic treatment (NR) | 3           | NR/259 (NA)      | OR          | 1.12 (0.61, 2.06)  | 1.12 (0.61, 2.06)   | 0.00/NA                           | >0.05        | NA      | NA      | N      | NA  | NS                            | H |
| Bogaty, 2018   | Psychosis (Ado, A) | Cannabis, current use           | Cognitive flexibility (NR)                | 8           | NR/1015 (NA)     | d           | 1.41 (0.76, 2.63)  | 0.19 (-0.16, 0.54)  | 82.0/NA                           | >0.05        | NA      | NA      | N      | NA  | NS                            | M |
| Bogaty, 2018   | Psychosis (Ado, A) | Cannabis, current use           | Conceptual set-shifting (NR)              | 8           | NR/740 (NA)      | d           | 1.78 (0.92, 3.45)  | 0.32 (-0.05, 0.67)  | 79.0/NA                           | >0.05        | NA      | NA      | N      | NA  | NS                            | M |
| Bogaty, 2018   | Psychosis (Ado, A) | Cannabis, current use           | Current IQ (unadjusted)                   | 6           | NR/658 (NA)      | d           | 1.34 (0.93, 1.92)  | -0.16 (-0.36, 0.04) | 37.99/0.02                        | >0.05        | N       | Y       | N      | N   | NS                            | M |
| Bogaty, 2018   | Psychosis (Ado, A) | Cannabis, current use           | Motor inhibition (NR)                     | 8           | NR/781 (NA)      | d           | 0.71 (0.48, 1.04)  | -0.19(-0.40, 0.02)  | 34.0/NA                           | >0.05        | NA      | NA      | N      | NA  | NS                            | M |
| Bogaty, 2018   | Psychosis (Ado, A) | Cannabis, current use           | Processing speed (NR)                     | 10          | NR/1823 (NA)     | d           | 1.43 (0.92, 2.24)  | 0.20 (-0.05, 0.45)  | 79.0/NA                           | >0.05        | NA      | NA      | N      | NA  | NS                            | M |
| Bogaty, 2018   | Psychosis (Ado, A) | Cannabis, current use           | Sustained attention (NR)                  | 9           | NR/771 (NA)      | d           | 2.70 (0.56, 12.95) | 0.55 (-0.32, 1.42)  | 94.0/NA                           | >0.05        | NA      | NA      | N      | NA  | NS                            | M |





| Source                         | Population                                                             | Cannabis                                                      | Outcome                                       | Sample size |                  | Effect size |                   |                        | Heterogeneity                     | Significance          |         |         | Biases |     | Class and quality of evidence |   |
|--------------------------------|------------------------------------------------------------------------|---------------------------------------------------------------|-----------------------------------------------|-------------|------------------|-------------|-------------------|------------------------|-----------------------------------|-----------------------|---------|---------|--------|-----|-------------------------------|---|
| Author, year                   | Population                                                             | Cannabinoid specific exposure                                 | Outcome                                       | k           | n/N (prevalence) | Metric      | eOR (95% CI)      | ES (95% CI)            | I <sup>2</sup> / tau <sup>2</sup> | p                     | PI sign | LS sign | SSE    | ESB | CE/CES                        | Q |
| Power, 2020                    | Frequent/dependent cannabis users (Ado)                                | Cannabis use                                                  | IQ decline (adjusted)                         | 7           | NR/5846 (NA)     | d           | 1.29 (1.06, 1.55) | -0.14 (-0.24, -0.03)   | 50.26/0.01                        | 0.010                 | N       | Y       | N      | N   | IV/IV                         | H |
| Power, 2020                    | Frequent/dependent cannabis users (Ado)                                | Cannabis use                                                  | Verbal IQ decline (adjusted)                  | 4           | NR/3672 (NA)     | d           | 1.38 (1.16, 1.66) | -0.18 (-0.28, -0.08)   | 15.02/0.00                        | 0.001                 | N       | N       | N      | N   | IV/IV                         | H |
| Power, 2020                    | Frequent/dependent cannabis users (Ado)                                | Cannabis use                                                  | Performance IQ (NR)                           | 5           | NR/2689 (NA)     | d           | 1.00 (0.86, 1.16) | 0.00 (-0.09, 0.08)     | 0.00/NA                           | >0.05                 | NA      | NA      | NA     | NA  | NS                            | H |
| <b>Insomnia</b>                |                                                                        |                                                               |                                               |             |                  |             |                   |                        |                                   |                       |         |         |        |     |                               |   |
| Bhagavan, 2020                 | Insomnia (A)                                                           | Cannabinoids                                                  | Sleep quality/quantity (NR)                   | 4           | NR/352 (NA)      | MD          | NA, beneficial    | 1.95 (1.04, 2.87)      | 19.40/0.00                        | 3.0x10 <sup>-5</sup>  | N       | Y       | N      | Y   | IV/ III                       | H |
| <b>Chronic pain population</b> |                                                                        |                                                               |                                               |             |                  |             |                   |                        |                                   |                       |         |         |        |     |                               |   |
| Noori, 2021                    | Chronic pain (A)                                                       | CBM                                                           | Pain relief (unadjusted)                      | 6           | NR/345 (NA)      | MD          | NA, beneficial    | -3.00 (-4.60, -1.40)   | 96.28/3.82                        | 2.0x10 <sup>-4</sup>  | N       | N       | N      | N   | IV/III                        | L |
| Noori, 2021                    | Chronic pain (A)                                                       | CBM                                                           | Oral morphine equivalence dose reduction (NR) | 8           | NR/723 (NA)      | MD          | NA                | -23.89 (-58.25, 10.47) | 90.31/1.81                        | >0.05                 | N       | Y       | Y      | N   | NS                            | L |
| <b>Mixed conditions</b>        |                                                                        |                                                               |                                               |             |                  |             |                   |                        |                                   |                       |         |         |        |     |                               |   |
| Goldenberg, 2017               | Mixed medical conditions (fibromyalgia, HIV, IBD, neuropatic pain) (A) | Nabiximol, nabilone, dronabinol cannabis extract, dexamabinol | Quality of life (NR)                          | 20          | NR/3902 (NA)     | d           | 1.09 (0.54, 2.22) | 0.05 (-0.34, 0.44)     | NR/NA                             | >0.05                 | NA      | NA      | N      | NA  | NS                            | M |
| <b>HCV+/- NAFDL population</b> |                                                                        |                                                               |                                               |             |                  |             |                   |                        |                                   |                       |         |         |        |     |                               |   |
| Farooqui, 2019                 | HCV+ NAFDL (A)                                                         | Marijuana use                                                 | Liver steatosis (adjusted)                    | 4           | NR/5962412 (NA)  | OR          | 0.78 (0.71, 0.87) | 0.78 (0.71, 0.87)      | 25.18/0.00                        | 3.31x10 <sup>-6</sup> | Y       | Y       | Y      | N   | IV/ III                       | M |

| Source                          | Population                                  | Cannabis                      | Outcome                                        | Sample size |                  | Effect size |                   |                   | Heterogeneity                     | Significance |         |         | Biases |     | Class and quality of evidence |   |
|---------------------------------|---------------------------------------------|-------------------------------|------------------------------------------------|-------------|------------------|-------------|-------------------|-------------------|-----------------------------------|--------------|---------|---------|--------|-----|-------------------------------|---|
| Author, year                    | Population                                  | Cannabinoid specific exposure | Outcome                                        | k           | n/N (prevalence) | Metric      | eOR (95% CI)      | ES (95% CI)       | I <sup>2</sup> / tau <sup>2</sup> | p            | PI sign | LS sign | SSE    | ESB | CE/CES                        | Q |
| Farooqui, 2018                  | HCV+ NAFDL (A)                              | Marijuana use                 | Liver fibrosis in coinfection HCV and HIV (NR) | 2           | NR/1265 (NA)     | HR          | 1.00 (0.93,1.07)  | 1.00 (0.93,1.07)  | 0.00/NA                           | >0.05        | NA      | NA      | N      | NA  | NS                            | M |
| Farooqui, 2018                  | HCV+ NAFDL (A)                              | Marijuana use                 | Liver fibrosis in hepatitis C (NR)             | 4           | NR/1166 (NA)     | OR          | 1.96 (0.79, 4.93) | 1.96 (0.79, 4.93) | 77.00/NA                          | >0.05        | NA      | NA      | N      | NA  | NS                            | M |
| Wijarnpreecha, 2018             | HCV (A)                                     | Cannabis extract, oromucosal  | Liver fibrosis (NR)                            | 3           | NR/898 (NA)      | OR          | 1.77 (0.78, 4.02) | 1.77 (0.78, 4.02) | 75.00/NA                          | >0.05        | NA      | NA      | NA     | NA  | NS                            | H |
| <b>Malignant CNS population</b> |                                             |                               |                                                |             |                  |             |                   |                   |                                   |              |         |         |        |     |                               |   |
| Rodriguez, 2020                 | Malignant central nervous system tumors (A) | Cannabidiol                   | Survival (NR)                                  | 2           | NR/44 (NA)       | RR          | 0.46 (0.16,1.32)  | 0.46 (0.16,1.32)  | 0.00/NA                           | >0.05        | NA      | NA      | N      | NA  | NS                            | L |

*Legend. A, adults; Ado, adolescents; C, children; CE, class of evidence; CES, class of evidence after removing the n>1000 cases criterion, and where possible additional sensitivity analyses as specified; CBM, cannabis based medicine; CI, confidence interval; CL, critically low; ES, effect size; ESB, excess significance bias; H, high; I<sup>2</sup>, percentage of variation across effect sizes that is due to heterogeneity rather than change; tau<sup>2</sup>, tau-squared heterogeneity; IQ, intelligence quotient; K, number of studies for each factor; L, low; LBW, low birth weight; LS, largest study with significant effect; M, moderate; n/N, number of cases/total number of cohort per factor; N, no; NA, not assessable; NR, not reported; OR, odds ratio; PI, prediction interval; Q, quality, AMSTAR 2; RR, risk ratio; SSE, small study effects; sign., significant; Y, yes; eOR>1 indicates "bad" outcome; \*, not significant in adjusted analyses; +, class of evidence convincing in cohort studies*



**Supplementary Table 6. Type of cannabis exposure across individual studies**

*See supplementary material 3.*

**Supplementary figure 1. Moderate and high certainty evidence according to GRADE, from randomized controlled trials on outcomes of cannabis-based medications in persons with mixed conditions**

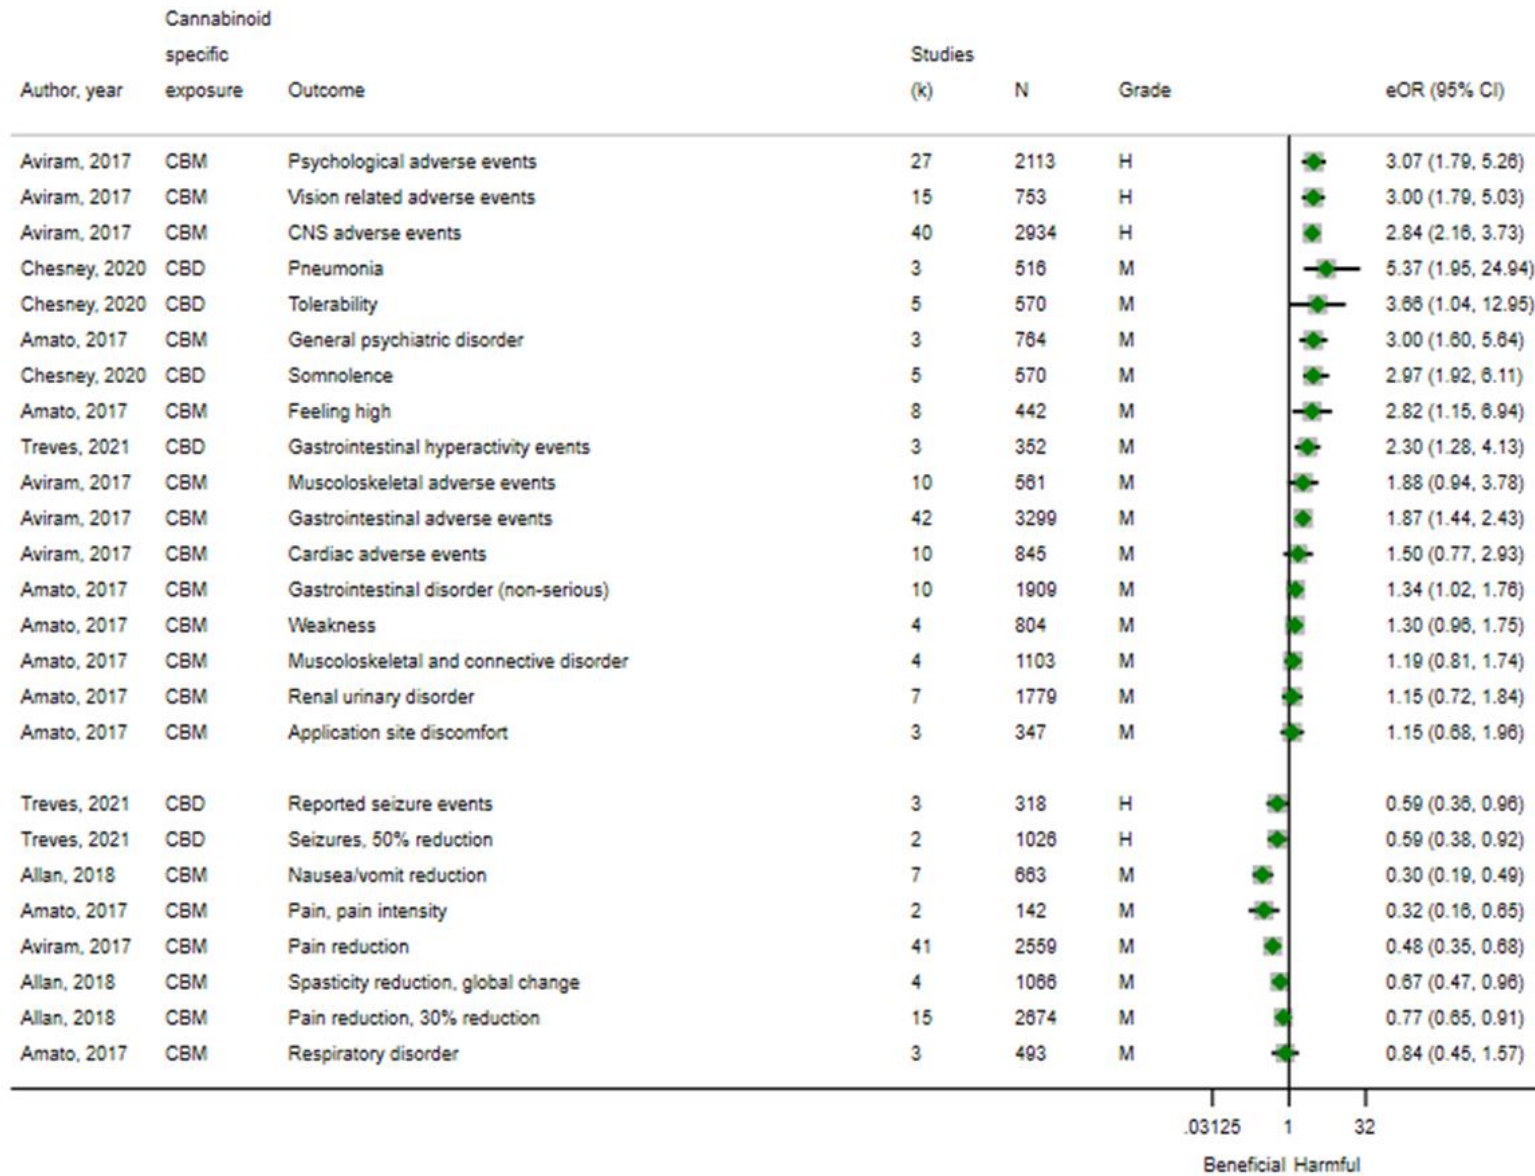

Legend. Results are displayed in descending order of level of evidence, and magnitude of effect size; CBD, cannabidiol; CBM, cannabis-based medicines; CNS, central nervous system; eOR, equivalent odds ratio; H, high; M, moderate; N, sample size.

**Supplementary figure 2. Moderate and high certainty evidence according to GRADE, from randomized controlled trials on outcomes of cannabis-based medications in the general population**

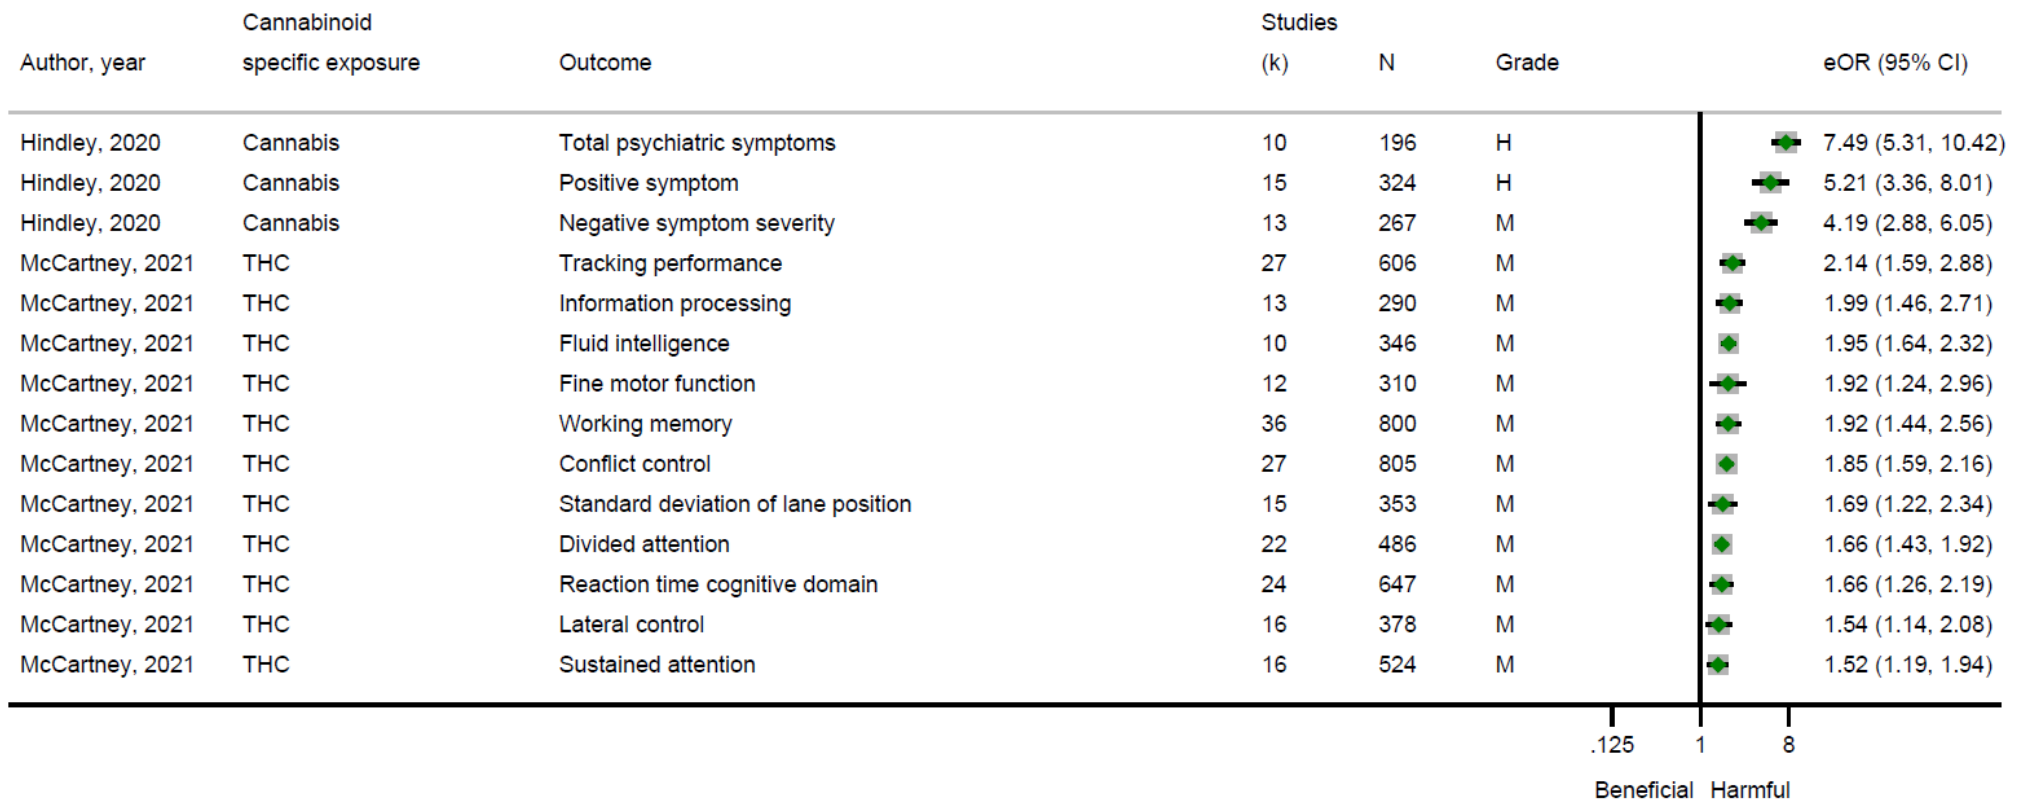

Legend. Results are displayed in descending order of level of evidence, and magnitude of effect size; eOR, equivalent odds ratio; H, high; M, moderate; N, sample size.



## Supplementary references

1. Chinn S. A simple method for converting an odds ratio to effect size for use in meta-analysis. *Stat Med*. 2000;19(22):3127-3131. doi:10.1002/1097-0258(20001130)19:22<3127::AID-SIM784>3.0.CO;2-M
2. Arango C, Dragioti E, Solmi M, et al. Risk and protective factors for mental disorders beyond genetics: an evidence-based atlas. *World Psychiatry*. 2021;20(3):417-436. doi:10.1002/wps.20894
3. Solmi M, Dragioti E, Croatto G, et al. Risk and Protective Factors for Personality Disorders: An Umbrella Review of Published Meta-Analyses of Case–Control and Cohort Studies. *Front Psychiatry*. 2021;12. doi:10.3389/fpsyt.2021.679379
4. Solmi M, Dragioti E, Arango C, et al. Risk and protective factors for mental disorders with onset in childhood/adolescence: An umbrella review of published meta-analyses of observational longitudinal studies. *Neurosci Biobehav Rev*. 2021;120:565-573. doi:10.1016/j.neubiorev.2020.09.002
5. Solmi M, Veronese N, Galvano D, et al. Factors Associated With Loneliness: An Umbrella Review Of Observational Studies. *J Affect Disord*. 2020;271:131-138. doi:10.1016/j.jad.2020.03.075
6. Solmi M, Radua J, Stubbs B, et al. Risk factors for eating disorders: an umbrella review of published meta-analyses. *Rev Bras Psiquiatr*. 2021;43(3):314-323. doi:10.1590/1516-4446-2020-1099
7. Dragioti E, Solmi M, Favaro A, et al. Association of Antidepressant Use With Adverse Health Outcomes: A Systematic Umbrella Review. *JAMA psychiatry*. Published online 2019. doi:10.1001/jamapsychiatry.2019.2859
8. Solmi M, Civardi S, Corti R, et al. Risk and protective factors for alcohol and tobacco related disorders: An umbrella review of observational studies. *Neurosci Biobehav Rev*. 2021;121:20-28. doi:10.1016/j.neubiorev.2020.11.010
9. Bortolato B, Köhler CA, Evangelou E, et al. Systematic assessment of environmental risk factors for bipolar disorder: an umbrella review of systematic reviews and meta-analyses. *Bipolar Disord*. 2017;19(2):84-96. doi:10.1111/bdi.12490
10. Kim JY, Son MJ, Son CY, et al. Environmental risk factors and biomarkers for autism spectrum disorder: an umbrella review of the evidence. *The Lancet Psychiatry*. 2019;6(7). doi:10.1016/S2215-0366(19)30181-6
11. Guyatt GH, Oxman AD, Vist GE, et al. GRADE: an emerging consensus on rating quality of evidence and strength of recommendations. *BMJ*. 2008;336(7650):924 LP - 926. doi:10.1136/bmj.39489.470347.AD
12. Sawilowsky S. Journal of Modern Applied Statistical Methods. *J Mod Appl Stat Methods*. 2009;8(2):597-599. doi:10.22237/jmasm/1257035100
13. Gates M, Gates A, Pieper D, et al. Reporting guideline for overviews of reviews of healthcare interventions: development of the PRIOR statement. *BMJ*. 2022;378:e070849. doi:10.1136/bmj-2022-070849
14. Page MJ, McKenzie JE, Bossuyt PM, et al. The PRISMA 2020 statement: An updated guideline for reporting systematic reviews. *BMJ*. 2021;372. doi:10.1136/bmj.n71



15. Abrams DI. The therapeutic effects of Cannabis and cannabinoids: An update from the National Academies of Sciences, Engineering and Medicine report. *Eur J Intern Med*. 2018;49(December 2016):7-11. doi:10.1016/j.ejim.2018.01.003
16. Addington J, Case N, Saleem MM, Auther AM, Cornblatt BA, Cadenhead KS. Substance use in clinical high risk for psychosis: A review of the literature. *Early Interv Psychiatry*. 2014;8(2):104-112. doi:10.1111/eip.12100
17. Alharbi FF, El-Guebaly N. Cannabis and amphetamine-type stimulant-induced psychoses: A systematic overview. *Addict Disord their Treat*. 2016;15(4):190-200. doi:10.1097/ADT.0000000000000086
18. Al-Khalil O. Cannabinoide im medizinischen Gebrauch – Review und Metaanalyse. *Praxis (Bern 1994)*. 2015;104(20):1103-1104. doi:10.1024/1661-8157/a002142
19. Allan GM, Finley CR, Ton J, et al. Systematic review of systematic reviews for medical cannabinoids. *Can Fam Physician*. 2018;64(2):e78-e94.
20. Allen MS, Walter EE. Health-Related Lifestyle Factors and Sexual Dysfunction: A Meta-Analysis of Population-Based Research. *J Sex Med*. 2018;15(4):458-475. doi:10.1016/j.jsxm.2018.02.008
21. Alshaarawy O, Anthony JC. Brief Report: Cannabis Smoking and Diabetes Mellitus: Results from Meta-analysis with Eight Independent Replication Samples. *Epidemiology*. 2015;26(4):597-600. doi:10.1097/EDE.0000000000000314
22. Anand P, Whiteside G, Fowler CJ, Hohmann AG. Targeting CB2 receptors and the endocannabinoid system for the treatment of pain. *Brain Res Rev*. 2009;60(1):255-266. doi:10.1016/j.brainresrev.2008.12.003
23. Ananth P, Reed-Weston A, Wolfe J. Medical marijuana in pediatric oncology: A review of the evidence and implications for practice. *Pediatr Blood Cancer*. 2018;65(2):1-9. doi:10.1002/pbc.26826
24. Andrade C. Cannabis and neuropsychiatry, 1: benefits and risks. *J Clin Psychiatry*. 2016;77(5):e551-4. doi:10.4088/JCP.16f10841
25. Andrade C. Cannabis and neuropsychiatry, 2: The longitudinal risk of psychosis as an adverse outcome. *J Clin Psychiatry*. 2016;77(6):e739-e742. doi:10.4088/JCP.16f10918
26. Andrzejewski K, Barbano R, Mink J. Cannabinoids in the treatment of movement disorders: A systematic review of case series and clinical trials. *Basal Ganglia*. 2016;6(3):173-181. doi:10.1016/j.baga.2016.06.001
27. Angarita GA, Emadi N, Hodges S, Morgan PT. Sleep abnormalities associated with alcohol, cannabis, cocaine, and opiate use: A comprehensive review. *Addict Sci Clin Pract*. 2016;11(1):1-17. doi:10.1186/s13722-016-0056-7
28. Antonsdottir IM, Smith J, Keltz M, Porsteinsson AP. Advancements in the treatment of agitation in Alzheimer's disease. *Expert Opin Pharmacother*. 2015;16(11):1649-1656. doi:10.1517/14656566.2015.1059422
29. Aryana A, Williams MA. Marijuana as a trigger of cardiovascular events: Speculation or scientific certainty? *Int J Cardiol*. 2007;118(2):141-144. doi:10.1016/j.ijcard.2006.08.001

30. Ashton CH, Moore PB, Gallagher P, Young AH. Cannabinoids in bipolar affective disorder: a review and discussion of their therapeutic potential. *J Psychopharmacol*. 2005;19(3):293-300. doi:10.1177/0269881105051541
31. John C. Ashton, Paul F. Smith. Cannabinoids and Cardiovascular Disease: The Outlook for Clinical Treatments. *Curr Vasc Pharmacol*. 2007;5(3):175-184. doi:10.2174/157016107781024109
32. Attal N. Symptomatic therapy in ATTR amyloidosis: pain killers in TTR-FAP. *Orphanet J Rare Dis*. 2015;10(S1):2015. doi:10.1186/1750-1172-10-s1-i1
33. Badowski M, Pandit NS. Pharmacologic Management of Human Immunodeficiency Virus Wasting Syndrome. *Pharmacother J Hum Pharmacol Drug Ther*. 2014;34(8):868-881. doi:10.1002/phar.1431
34. Badowski ME. A review of oral cannabinoids and medical marijuana for the treatment of chemotherapy-induced nausea and vomiting: a focus on pharmacokinetic variability and pharmacodynamics. *Cancer Chemother Pharmacol*. 2017;80(3):441-449. doi:10.1007/s00280-017-3387-5
35. Bagot KS, Milin R, Kaminer Y. Adolescent Initiation of Cannabis Use and Early-Onset Psychosis. *Subst Abuse*. 2015;36(4):524-533. doi:10.1080/08897077.2014.995332
36. Bagshaw SM, Hagen NA. Medical efficacy of cannabinoids and marijuana: a comprehensive review of the literature. *J Palliat Care*. 2002;18(2):111-122.
37. Bahji A, Mazhar MN. Treatment of cannabis dependence with synthetic cannabinoids: A systematic review. *Can J Addict*. 2016;7(4):8-13.
38. Bahji A, Meyyappan AC, Hawken ER, Tibbo PG. Pharmacotherapies for cannabis use disorder: A systematic review and network meta-analysis. *Int J Drug Policy*. 2021;97:103295. doi:https://doi.org/10.1016/j.drugpo.2021.103295
39. Baker AL, Hides L, Lubman DI. Treatment of Cannabis Use Among People With Psychotic or Depressive Disorders. *J Clin Psychiatry*. 2010;71(03):247-254. doi:10.4088/JCP.09r05119gry
40. Baldacchino A, Hughes Z, Kehoe M, et al. Cannabis Psychosis: Examining the Evidence for a Distinctive Psychopathology in a Systematic and Narrative Review. *Am J Addict*. 2012;21:S88-S98. doi:10.1111/j.1521-0391.2012.00295.x
41. Baldinger R, Katzberg HD, Weber M. Treatment for cramps in amyotrophic lateral sclerosis/motor neuron disease. *Cochrane Database Syst Rev*. Published online April 2012. doi:10.1002/14651858.CD004157.pub2
42. Bally N, Zullino D, Aubry J-M. Cannabis use and first manic episode. *J Affect Disord*. 2014;165:103-108. doi:10.1016/j.jad.2014.04.038
43. Bao Y, Kong X, Yang L, et al. Complementary and Alternative Medicine for Cancer Pain: An Overview of Systematic Reviews. *Evidence-Based Complement Altern Med*. 2014;2014:1-9. doi:10.1155/2014/170396
44. Barbetta C, Currow DC, Johnson MJ. Non-opioid medications for the relief of chronic breathlessness: current evidence. *Expert Rev Respir Med*. 2017;11(4):333-341. doi:10.1080/17476348.2017.1305896

45. Barkin JA, Nemeth Z, Saluja AK, Barkin JS. A Systematic Review of Cannabis Use and the Development of Acute Pancreatitis. *Am J Gastroenterol*. 2016;111:S50-S51. doi:10.14309/00000434-201610001-00109
46. Barkin JA, Nemeth Z, Saluja AK, Barkin JS. Cannabis-Induced Acute Pancreatitis. *Pancreas*. 2017;46(8):1035-1038. doi:10.1097/MPA.0000000000000873
47. Baron EP. Comprehensive Review of Medicinal Marijuana, Cannabinoids, and Therapeutic Implications in Medicine and Headache: What a Long Strange Trip It's Been .... *Headache J Head Face Pain*. 2015;55(6):885-916. doi:10.1111/head.12570
48. Barthelemy OJ, Richardson MA, Cabral HJ, Frank DA. Prenatal, perinatal, and adolescent exposure to marijuana: Relationships with aggressive behavior. *Neurotoxicol Teratol*. 2016;58:60-77. doi:10.1016/j.ntt.2016.06.009
49. Batalla A, Bhattacharyya S, Yücel M, et al. Structural and Functional Imaging Studies in Chronic Cannabis Users: A Systematic Review of Adolescent and Adult Findings. Lu L, ed. *PLoS One*. 2013;8(2):e55821. doi:10.1371/journal.pone.0055821
50. Batalla A, Crippa JA, Busatto GF, et al. Neuroimaging Studies of Acute Effects of THC and CBD in Humans and Animals: a Systematic Review. *Curr Pharm Des*. 2014;20(13):2168-2185. doi:10.2174/13816128113199990432
51. Batet Sanchez D. Neuroimagen estructural de primeros episodios psicóticos en consumidores de cánnabis. *Psiquiatr Biológica*. 2016;23(3):103-111. doi:10.1016/j.psiq.2016.06.003
52. Beaulieu P, Rice AS. Pharmacologie des dérivés cannabinoïdes : applications au traitement de la douleur ? *Ann Fr Anesth Reanim*. 2002;21(6):493-508. doi:10.1016/S0750-7658(02)00663-9
53. Beaulieu P, Ware M. Reassessment of the role of cannabinoids in the management of pain. *Curr Opin Anaesthesiol*. 2007;20(5):473-477. doi:10.1097/ACO.0b013e3282efd175
54. Behm K, Morgan P. The effect of symptom-controlling medication on gait outcomes in people with multiple sclerosis: a systematic review. *Disabil Rehabil*. 2018;40(15):1733-1744. doi:10.1080/09638288.2017.1309581
55. Belbasis L, Köhler CA, Stefanis N, et al. Risk factors and peripheral biomarkers for schizophrenia spectrum disorders: an umbrella review of meta-analyses. *Acta Psychiatr Scand*. 2018;137(2):88-97. doi:10.1111/acps.12847
56. Ben Amar M. Cannabinoids in medicine: A review of their therapeutic potential. *J Ethnopharmacol*. 2006;105(1-2):1-25. doi:10.1016/j.jep.2006.02.001
57. Amar M Ben, Potvin S. Cannabis and Psychosis: What is the Link? *J Psychoactive Drugs*. 2007;39(2):131-142. doi:10.1080/02791072.2007.10399871
58. Beneria A, Santesteban-Echarri O, Daigre C, et al. Online interventions for cannabis use among adolescents and young adults: Systematic review and meta-analysis. *Early Interv Psychiatry*. 2021;n/a(n/a). doi:https://doi.org/10.1111/eip.13226
59. Benze G, Geyer A, Alt-Epping B, Nauck F. Behandlung von Übelkeit und Erbrechen mit 5HT3-Antagonisten, Steroiden, Antihistaminika, Anticholinergika, Somatostatinanaloga, Benzodiazepinen und Cannabinoiden bei Palliativpatienten. *Der Schmerz*. 2012;26(5):481-499. doi:10.1007/s00482-012-1235-4

60. Berthet A, De Cesare M, Favrat B, et al. A systematic review of passive exposure to cannabis. *Forensic Sci Int*. 2016;269:97-112. doi:10.1016/j.forsciint.2016.11.017
61. Bertolín-Guillén JM, López-Arquero FJ, Martínez-Franco L. Cannabis-induced mania? *J Subst Use*. 2008;13(2):139-141. doi:10.1080/14659890701374661
62. Bhandari S, Venkatesan T. Novel Treatments for Cyclic Vomiting Syndrome: Beyond Ondansetron and Amitriptyline. *Curr Treat Options Gastroenterol*. 2016;14(4):495-506. doi:10.1007/s11938-016-0114-y
63. Bhattacharyya S, Crippa J, Martin-Santos R, Winton-Brown T, Fusar-Poli P. Imaging the Neural Effects of Cannabinoids: Current Status and Future Opportunities for Psychopharmacology. *Curr Pharm Des*. 2009;15(22):2603-2614. doi:10.2174/138161209788957465
64. Bifulco M, Laezza C, Pisanti S, Gazzero P. Cannabinoids and cancer: pros and cons of an antitumour strategy. *Br J Pharmacol*. 2006;148(2):123-135. doi:10.1038/sj.bjp.0706632
65. Birdsall SM, Birdsall TC, Tims LA. The Use of Medical Marijuana in Cancer. *Curr Oncol Rep*. 2016;18(7):40. doi:10.1007/s11912-016-0530-0
66. Blake A, Wan BA, Malek L, et al. A selective review of medical cannabis in cancer pain management. *Ann Palliat Med*. 2017;6(S2):S215-S222. doi:10.21037/apm.2017.08.05
67. Blessing EM, Steenkamp MM, Manzanares J, Marmar CR. Cannabidiol as a Potential Treatment for Anxiety Disorders. *Neurotherapeutics*. 2015;12(4):825-836. doi:10.1007/s13311-015-0387-1
68. Blest-Hopley G, Giampietro V, Bhattacharyya S. Residual effects of cannabis use in adolescent and adult brains - A meta-analysis of fMRI studies. *Neurosci Biobehav Rev*. 2018;88:26-41. doi:10.1016/j.neubiorev.2018.03.008
69. Blest-Hopley G, Giampietro V, Bhattacharyya S. Residual effects of cannabis use in adolescent and adult brains — A meta-analysis of fMRI studies. *Neurosci Biobehav Rev*. 2018;88:26-41. doi:10.1016/j.neubiorev.2018.03.008
70. Blumenthal DE, Malemud CJ. Recent strategies for drug development in fibromyalgia syndrome. *Expert Rev Neurother*. 2016;16(12):1407-1411. doi:10.1080/14737175.2016.1207531
71. Bogaty SER, Lee RSC, Hickie IB, Hermens DF. Meta-analysis of neurocognition in young psychosis patients with current cannabis use. *J Psychiatr Res*. 2018;99:22-32. doi:10.1016/j.jpsychires.2018.01.010
72. Bonnet U, Mahler H. Synthetische Cannabinoide: Verbreitung, Suchtbiologie & aktuelle Perspektive der persönlichen Gesundheitsgefährdung. *Fortschritte der Neurol · Psychiatr*. 2015;83(04):221-231. doi:10.1055/s-0034-1399307
73. Borgan F, Beck K, Butler E, et al. The effects of cannabinoid 1 receptor compounds on memory: a meta-analysis and systematic review across species. *Psychopharmacology (Berl)*. 2019;236(11):3257-3270. doi:10.1007/s00213-019-05283-3
74. Bossong MG, Jansma JM, Bhattacharyya S, Ramsey NF. Role of the endocannabinoid system in brain functions relevant for schizophrenia: An overview of human challenge studies with cannabis or  $\Delta^9$ -tetrahydrocannabinol (THC). *Prog Neuro-Psychopharmacology Biol Psychiatry*. 2014;52:53-69. doi:10.1016/j.pnpbp.2013.11.017

75. Bowen LL, McRae-Clark AL. Therapeutic Benefit of Smoked Cannabis in Randomized Placebo-Controlled Studies. *Pharmacother J Hum Pharmacol Drug Ther.* 2018;38(1):80-85. doi:10.1002/phar.2064
76. Boychuk DG, Goddard G, Mauro G, Orellana MF. The Effectiveness of Cannabinoids in the Management of Chronic Nonmalignant Neuropathic Pain: A Systematic Review. *J Oral Facial Pain Headache.* 2015;29(1):7-14. doi:10.11607/ofph.1274
77. Brafford May M, Glode A. Dronabinol for chemotherapy-induced nausea and vomiting unresponsive to antiemetics. *Cancer Manag Res.* Published online May 2016:49. doi:10.2147/CMAR.S81425
78. Braun IM, Meyer FL, Gagne JJ, et al. Experts' perspectives on the role of medical marijuana in oncology: A semistructured interview study. *Psychooncology.* 2017;26(8):1087-1092. doi:10.1002/pon.4365
79. Braun I, Nabati L. Developing Institutional Medical Marijuana Guidelines: Understanding Law and Science (SA524). *J Pain Symptom Manage.* 2016;51(2):396-397. doi:10.1016/j.jpainsymman.2015.12.283
80. Bravo-Soto GA, Juri C. Are cannabinoids effective for Parkinson's disease? *Medwave.* 2017;17(Suppl2):e6974-e6974. doi:10.5867/medwave.2017.6974
81. Breet E, Goldstone D, Bantjes J. Substance use and suicidal ideation and behaviour in low- and middle-income countries: a systematic review. *BMC Public Health.* 2018;18(1):549. doi:10.1186/s12889-018-5425-6
82. Brents LK. Marijuana, the Endocannabinoid System and the Female Reproductive System. *Yale J Biol Med.* 2016;89(2):175-191.
83. Broyd SJ, van Hell HH, Beale C, Yücel M, Solowij N. Acute and Chronic Effects of Cannabinoids on Human Cognition—A Systematic Review. *Biol Psychiatry.* 2016;79(7):557-567. doi:10.1016/j.biopsych.2015.12.002
84. Buadze A, Kaiser S, Stohler R, Roessler W, Seifritz E, Liebrez M. Patient's Perceptions of the Cannabis-psychosis Link - A Systematic Review. *Curr Pharm Des.* 2012;18(32):5105-5112. doi:10.2174/138161212802884645
85. Budney AJ, Moore BA. Development and Consequences of Cannabis Dependence. *J Clin Pharmacol.* 2002;42(S1):28S-33S. doi:10.1002/j.1552-4604.2002.tb06000.x
86. Budney AJ. Review of the Validity and Significance of Cannabis Withdrawal Syndrome. *Am J Psychiatry.* 2004;161(11):1967-1977. doi:10.1176/appi.ajp.161.11.1967
87. Bugra H, Rapp C, Studerus E, Aston J, Borgwardt S, Riecher-Rössler A. Kann Cannabis das Risiko für schizophrene Psychosen erhöhen? *Fortschritte der Neurol · Psychiatr.* 2012;80(11):635-643. doi:10.1055/s-0032-1325415
88. Burns TL, Ineck JR. Cannabinoid Analgesia as a Potential New Therapeutic Option in the Treatment of Chronic Pain. *Ann Pharmacother.* 2006;40(2):251-260. doi:10.1345/aph.1G217
89. Burns L, Coleman-Cowger VH, Breen C. Managing Maternal Substance Use in the Perinatal Period: Current Concerns and Treatment Approaches in the United States and Australia. *Subst Abuse Res Treat.* 2016;10s1:SART.S34558. doi:10.4137/SART.S34558

90. Busch V, Loyen A, Lodder M, Schrijvers AJP, van Yperen TA, de Leeuw JRJ. The Effects of Adolescent Health-Related Behavior on Academic Performance. *Rev Educ Res.* 2014;84(2):245-274. doi:10.3102/0034654313518441
91. Butler H, Korbonits M. Cannabinoids for clinicians: the rise and fall of the cannabinoid antagonists. *Eur J Endocrinol.* 2009;161(5):655-662. doi:10.1530/EJE-09-0511
92. Cabeza C, Corsi O, Pérez-Cruz P. Are cannabinoids an alternative for cachexia-anorexia syndrome in patients with advanced cancer? *Medwave.* 2017;17(09):e7130-e7130. doi:10.5867/medwave.2017.09.7130
93. Cadet JL, Bisagno V, Milroy CM. Neuropathology of substance use disorders. *Acta Neuropathol.* 2014;127(1):91-107. doi:10.1007/s00401-013-1221-7
94. Cadet JL, Bisagno V. Neuropsychological Consequences of Chronic Drug Use: Relevance to Treatment Approaches. *Front Psychiatry.* 2016;6. doi:10.3389/fpsyt.2015.00189
95. Cairns EA, Baldrige WH, Kelly MEM. The Endocannabinoid System as a Therapeutic Target in Glaucoma. *Neural Plast.* 2016;2016:1-10. doi:10.1155/2016/9364091
96. Calabria B, Degenhardt L, Briegleb C, et al. Systematic review of prospective studies investigating "remission" from amphetamine, cannabis, cocaine or opioid dependence. *Addict Behav.* 2010;35(8):741-749. doi:10.1016/j.addbeh.2010.03.019
97. Calandre EP, Rico-Villademoros F, Slim M. An update on pharmacotherapy for the treatment of fibromyalgia. *Expert Opin Pharmacother.* 2015;16(9):1347-1368. doi:10.1517/14656566.2015.1047343
98. Campbell J. Cannabis: the evidence. *Nurs Stand.* 1999;13(44):45-47. doi:10.7748/ns1999.07.13.44.45.c2647
99. Campbell FA. Are cannabinoids an effective and safe treatment option in the management of pain? A qualitative systematic review. *BMJ.* 2001;323(7303):13-13. doi:10.1136/bmj.323.7303.13
100. Campillo N, Paez J. Cannabinoid System in Neurodegeneration: New Perspectives in Alzheimers Disease. *Mini-Reviews Med Chem.* 2009;9(5):539-559. doi:10.2174/138955709788167628
101. Cancino Botello MC, Canseco Navarro MDLA, Peña Serrano A, Molina López F, Hernández Sánchez JM. Psychosis, cause or consequence of substance use disorder. *Eur Psychiatry.* 2016;33(S1):S376-S376. doi:10.1016/j.eurpsy.2016.01.1349
102. Caplan GA, Brigham BA. Marijuana smoking and carcinoma of the tongue. Is there an association? *Cancer.* 1990;66(5):1005-1006. doi:10.1002/1097-0142(19900901)66:5<1005::AID-CNCR2820660535>3.0.CO;2-H
103. Carrigan N, Barkus E. A systematic review of the relationship between psychological disorders or substance use and self-reported cognitive failures. *Cogn Neuropsychiatry.* 2016;21(6):539-564. doi:10.1080/13546805.2016.1250620
104. Fidelia Cascini, Carola Aiello, GianLuca Di Tanna. Increasing Delta-9-Tetrahydrocannabinol (?-9-THC) Content in Herbal Cannabis Over Time: Systematic Review and Meta-Analysis. *Curr Drug Abuse Rev.* 2012;5(1):32-40. doi:10.2174/1874473711205010032

105. Castaneto MS, Gorelick DA, Desrosiers NA, Hartman RL, Pirard S, Huestis MA. Synthetic cannabinoids: Epidemiology, pharmacodynamics, and clinical implications. *Drug Alcohol Depend.* 2014;144:12-41. doi:10.1016/j.drugalcdep.2014.08.005
106. Castle DJ, Ames FR. Cannabis and the Brain. *Aust New Zeal J Psychiatry.* 1996;30(2):179-183. doi:10.3109/00048679609076093
107. Chatkin JM, Zani-Silva L, Ferreira I, Zamel N. Cannabis-Associated Asthma and Allergies. *Clin Rev Allergy Immunol.* 2019;56(2):196-206. doi:10.1007/s12016-017-8644-1
108. Chisini LA, Cademartori MG, Francia A, et al. Is the use of Cannabis associated with periodontitis? A systematic review and meta-analysis. *J Periodontal Res.* 2019;54(4):311-317. doi:10.1111/jre.12639
109. Chiurchiù V, Leuti A, Maccarrone M. Cannabinoid Signaling and Neuroinflammatory Diseases: A Melting pot for the Regulation of Brain Immune Responses. *J Neuroimmune Pharmacol.* 2015;10(2):268-280. doi:10.1007/s11481-015-9584-2
110. Cinti S. Medical Marijuana in HIV-Positive Patients: What Do We Know? *J Int Assoc Physicians AIDS Care.* 2009;8(6):342-346. doi:10.1177/1545109709351167
111. Claflin SB, van der Mei IAF, Taylor B V. Complementary and alternative treatments of multiple sclerosis: a review of the evidence from 2001 to 2016. *J Neurol Neurosurg Psychiatry.* 2018;89(1):34-41. doi:10.1136/jnnp-2016-314490
112. Clark A, Lynch M, Ware M, Beaulieu P, McGilveray I, Gourlay D. Guidelines for the Use of Cannabinoid Compounds in Chronic Pain. *Pain Res Manag.* 2005;10(suppl a):44A-46A. doi:10.1155/2005/894781
113. Cohen M, Solowij N, Carr V. Cannabis, Cannabinoids and Schizophrenia: Integration of the Evidence. *Aust New Zeal J Psychiatry.* 2008;42(5):357-368. doi:10.1080/00048670801961156
114. Cohen K, Weinstein A. The Effects of Cannabinoids on Executive Functions: Evidence from Cannabis and Synthetic Cannabinoids—A Systematic Review. *Brain Sci.* 2018;8(3):40. doi:10.3390/brainsci8030040
115. Colizzi M, Bhattacharyya S. Cannabis use and the development of tolerance: a systematic review of human evidence. *Neurosci Biobehav Rev.* 2018;93:1-25. doi:10.1016/j.neubiorev.2018.07.014
116. Collo G, Cavalleri L, Spano P. Structural plasticity in mesencephalic dopaminergic neurons produced by drugs of abuse: critical role of BDNF and dopamine. *Front Pharmacol.* 2014;5. doi:10.3389/fphar.2014.00259
117. Compton MT, Whicker NE. Alcohol and Cannabis Use in Urban, African American, First-Episode Schizophrenia-Spectrum Patients. *J Clin Psychiatry.* 2007;68(12):1939-1945. doi:10.4088/JCP.v68n1215
118. Contreras T, Bravo-Soto GA, Rada G. Do cannabinoids constitute a therapeutic alternative for anorexia nervosa? *Medwave.* 2017;17(09):e7095-e7095. doi:10.5867/medwave.2017.09.7095
119. Contreras T, Bravo-Soto G, Rada G. Do cannabinoids constitute a therapeutic alternative for insomnia? *Medwave.* 2018;18(01):e7151-e7151. doi:10.5867/medwave.2018.01.7151

120. Cookey J, Bernier D, Tibbo PG. White matter changes in early phase schizophrenia and cannabis use: An update and systematic review of diffusion tensor imaging studies. *Schizophr Res.* 2014;156(2-3):137-142. doi:10.1016/j.schres.2014.04.026
121. Cooper ZD. Adverse Effects of Synthetic Cannabinoids: Management of Acute Toxicity and Withdrawal. *Curr Psychiatry Rep.* 2016;18(5):52. doi:10.1007/s11920-016-0694-1
122. Copeland J. Cannabis use and its associated disorders: Clinical care. *Aust Fam Physician.* 2016;45(12):874-877.
123. Correa F, Mestre L, Molina-Holgado E, et al. The Role of Cannabinoid System on Immune Modulation: Therapeutic Implications on CNS Inflammation. *Mini-Reviews Med Chem.* 2005;5(7):671-675. doi:10.2174/1389557054368790
124. Costa B. On the Pharmacological Properties of  $\Delta^9$ -Tetrahydrocannabinol (THC). *Chem Biodivers.* 2007;4(8):1664-1677. doi:10.1002/cbdv.200790146
125. Costa MA. The endocannabinoid system: A novel player in human placentation. *Reprod Toxicol.* 2016;61:58-67. doi:10.1016/j.reprotox.2016.03.002
126. Cottencin O, Rolland B, Karila L. New Designer Drugs (Synthetic Cannabinoids and Synthetic Cathinones): Review of Literature. *Curr Pharm Des.* 2014;20(25):4106-4111. doi:10.2174/13816128113199990622
127. Courts J, Maskill V, Gray A, Glue P. Signs and symptoms associated with synthetic cannabinoid toxicity: systematic review. *Australas Psychiatry.* 2016;24(6):598-601. doi:10.1177/1039856216663733
128. Crean RD, Crane NA, Mason BJ. An Evidence-Based Review of Acute and Long-Term Effects of Cannabis Use on Executive Cognitive Functions. *J Addict Med.* 2011;5(1):1-8. doi:10.1097/ADM.0b013e31820c23fa
129. Crippa JA, Zuardi AW, Martín-Santos R, et al. Cannabis and anxiety: a critical review of the evidence. *Hum Psychopharmacol Clin Exp.* 2009;24(7):515-523. doi:10.1002/hup.1048
130. Crippa JA, Derenusson GN, Chagas MH, et al. Pharmacological interventions in the treatment of the acute effects of cannabis: a systematic review of literature. *Harm Reduct J.* 2012;9(1):7. doi:10.1186/1477-7517-9-7
131. Crippa J, Hallak J, Abilio V, de Lacerda A, Zuardi A. Cannabidiol and Sodium Nitroprusside: Two Novel Neuromodulatory Pharmacological Interventions to Treat and Prevent Psychosis. *CNS Neurol Disord - Drug Targets.* 2015;14(8):970-978. doi:10.2174/1871527314666150909113930
132. Croxford JL. Therapeutic Potential of Cannabinoids in CNS Disease. *CNS Drugs.* 2003;17(3):179-202. doi:10.2165/00023210-200317030-00004
133. Croxford JL, Yamamura T. Cannabinoids and the immune system: Potential for the treatment of inflammatory diseases? *J Neuroimmunol.* 2005;166(1-2):3-18. doi:10.1016/j.jneuroim.2005.04.023
134. Cuba LF, Salum FG, Cherubini K, Figueiredo MAZ. Cannabidiol: an alternative therapeutic agent for oral mucositis? *J Clin Pharm Ther.* 2017;42(3):245-250. doi:10.1111/jcpt.12504
135. Curtis A, Clarke CE, Rickards HE. Cannabinoids for Tourette's Syndrome. *Cochrane Database Syst Rev.* Published online October 2009. doi:10.1002/14651858.CD006565.pub2



136. Darkovska-Serafimovska M, Serafimovska T, Arsova-Saradinovska Z, Stefanoski S, Keskovski Z, Balkanov T. Pharmacotherapeutic considerations for use of cannabinoids to relieve pain in patients with malignant diseases. *J Pain Res.* 2018;11:837-842. doi:10.2147/JPR.S160556
137. Das R. S.25.03 Cannabinoid and glutamatergic targets for improving the treatment of maladaptive memory in fear and addiction. *Eur Neuropsychopharmacol.* 2015;25(2008):S147. doi:10.1016/s0924-977x(15)30113-9
138. De Almeida Pereira F, Torres AC, Philadelpho VO, et al. Efeitos do canabidiol na frequência das crises epilépticas: Uma revisão sistemática. *Rev Bras Neurol e Psiquiatr.* 2018;22(1):86-100.
139. de Irala J, Ruiz-Canela M, Martínez-González MA. Causal relationship between cannabis use and psychotic symptoms or depression. Should we wait and see? A public health perspective. *Med Sci Monit.* 2005;11(12):RA355-8. doi:16319805
140. de Tommaso M, Kunz M, Valeriani M. Therapeutic approach to pain in neurodegenerative diseases: current evidence and perspectives. *Expert Rev Neurother.* 2017;17(2):143-153. doi:10.1080/14737175.2016.1210512
141. De Vita MJ, Moskal D, Maisto SA, Ansell EB. Association of Cannabinoid Administration with Experimental Pain in Healthy Adults: A Systematic Review and Meta-analysis. *JAMA Psychiatry.* 2018;75(11):1118-1127. doi:10.1001/jamapsychiatry.2018.2503
142. Degenhardt L, Hall W, Lynskey M. Exploring the association between cannabis use and depression. *Addiction.* 2003;98(11):1493-1504. doi:10.1046/j.1360-0443.2003.00437.x
143. Degenhardt L, Hall WD. The adverse effects of cannabinoids: implications for use of medical marijuana. *Can Med Assoc J.* 2008;178(13):1685-1686. doi:10.1503/cmaj.080585
144. Dekker N, Linszen DH, De Haan L. Reasons for Cannabis Use and Effects of Cannabis Use as Reported by Patients with Psychotic Disorders. *Psychopathology.* 2009;42(6):350-360. doi:10.1159/000236906
145. DeLisi LE. The effect of cannabis on the brain: can it cause brain anomalies that lead to increased risk for schizophrenia? *Curr Opin Psychiatry.* 2008;21(2):140-150. doi:10.1097/YCO.0b013e3282f51266
146. Denier N, Walter M, Bendfeldt K, Lang U. Resting State Abnormalities in Psychosis Compared to Acute Cannabinoids and Opioids Challenges: A Systematic Review of Functional Imaging Studies. *Curr Pharm Des.* 2012;18(32):5081-5092. doi:10.2174/138161212802884717
147. Deshpande A, Mailis-Gagnon A, Zoheiry N, Lakha SF. Efficacy and adverse effects of medical marijuana for chronic noncancer pain: Systematic review of randomized controlled trials. *Can Fam Physician.* 2015;61(8):e372-81.
148. Detyniecki K, Hirsch L. Marijuana Use in Epilepsy: The Myth and the Reality. *Curr Neurol Neurosci Rep.* 2015;15(10):65. doi:10.1007/s11910-015-0586-5
149. Dimitrios L, Aris F. Efficacy, tolerability and safety of cannabinoids for management of pain in adult patients with multiple sclerosis: A systematic review and meta-analysis. *Signa Vitae.* 2021;17(1):10. doi:10.22514/sv.2021.157

150. Di Forti M, Morrison PD, Butt A, Murray RM. Cannabis use and psychiatric and cognitive disorders: the chicken or the egg? *Curr Opin Psychiatry*. 2007;20(3):228-234. doi:10.1097/YCO.0b013e3280fa838e
151. Doggui R, Elsayy W, Conti AA, Baldacchino A. Association between chronic psychoactive substances use and systemic inflammation: A systematic review and meta-analysis. *Neurosci Biobehav Rev*. 2021;125:208-220. doi:https://doi.org/10.1016/j.neubiorev.2021.02.031
152. dos Santos RG, Hallak JEC, Leite JP, Zuardi AW, Crippa JAS. Phytocannabinoids and epilepsy. *J Clin Pharm Ther*. 2015;40(2):135-143. doi:10.1111/jcpt.12235
153. Dosenovic S, Jelacic Kadic A, Miljanovic M, et al. Interventions for Neuropathic Pain. *Anesth Analg*. 2017;125(2):643-652. doi:10.1213/ANE.0000000000001998
154. Douet V, Chang L, Stoytcheva B, Ernst T. Sex differences on cortical brain morphometry and behaviors in adolescent marijuana users. *Drug Alcohol Depend*. 2017;171:e55-e56. doi:10.1016/j.drugalcdep.2016.08.164
155. du Plessis SS, Agarwal A, Syriac A. Marijuana, phytocannabinoids, the endocannabinoid system, and male fertility. *J Assist Reprod Genet*. 2015;32(11):1575-1588. doi:10.1007/s10815-015-0553-8
156. Eisenstein TK, Meissler JJ. Effects of Cannabinoids on T-cell Function and Resistance to Infection. *J Neuroimmune Pharmacol*. 2015;10(2):204-216. doi:10.1007/s11481-015-9603-3
157. Elliott J, DeJean D, Clifford T, et al. Cannabis-based products for pediatric epilepsy: A systematic review. *Epilepsia*. 2019;60(1):6-19. doi:10.1111/epi.14608
158. Esmaeelzadeh S, Moraros J, Thorpe L, Bird Y. Examining the Association and Directionality between Mental Health Disorders and Substance Use among Adolescents and Young Adults in the U.S. and Canada-A Systematic Review and Meta-Analysis. *J Clin Med*. 2018;7(12). doi:10.3390/jcm7120543
159. Elowe J, Golay P, Baumann P, Solida-Tozzi A, Conus P. Could cannabis use moderate the association between insight and depression in psychosis: a prospective study. *Eur Neuropsychopharmacol*. 2016;26:S504. doi:10.1016/S0924-977X(16)31523-1
160. England TJ, Hind WH, Rasid NA, O'Sullivan SE. Cannabinoids in Experimental Stroke: A Systematic Review and Meta-Analysis. *J Cereb Blood Flow Metab*. 2015;35(3):348-358. doi:10.1038/jcbfm.2014.218
161. Farquhar-Smith WP. Do cannabinoids have a role in cancer pain management? *Curr Opin Support Palliat Care*. 2009;3(1):7-13. doi:10.1097/SPC.0b013e3283260612
162. Hosein Farzaei M, Bahramsoltani R, Rahimi R. Phytochemicals as Adjunctive with Conventional Anticancer Therapies. *Curr Pharm Des*. 2016;22(27):4201-4218. doi:10.2174/1381612822666160601100823
163. Hosein Farzaei M, Bahramsoltani R, Rahimi R, Abbasabadi F, Abdollahi M. A Systematic Review of Plant-Derived Natural Compounds for Anxiety Disorders. *Curr Top Med Chem*. 2016;16(17):1924-1942. doi:10.2174/1568026616666160204121039

164. Farzaei MH, Shahpiri Z, Bahramsoltani R, Nia MM, Najafi F, Rahimi R. Efficacy and Tolerability of Phytomedicines in Multiple Sclerosis Patients: A Review. *CNS Drugs*. 2017;31(10):867-889. doi:10.1007/s40263-017-0466-4
165. Fattore L. Synthetic Cannabinoids—Further Evidence Supporting the Relationship Between Cannabinoids and Psychosis. *Biol Psychiatry*. 2016;79(7):539-548. doi:10.1016/j.biopsych.2016.02.001
166. Fergusson DM, Hall W, Boden JM, Horwood LJ. Rethinking cigarette smoking, cannabis use, and psychosis. *The Lancet Psychiatry*. 2015;2(7):581-582. doi:10.1016/S2215-0366(15)00208-4
167. Fernández-ruiz J, Gómez M, Hernández M, Miguel R de, Ramos JA. Cannabinoids and gene expression during brain development. *Neurotox Res*. 2004;6(5):389-401. doi:10.1007/BF03033314
168. Fernández-Ruiz J, González S. Cannabinoid Control of Motor Function at the Basal Ganglia. In: *Cannabinoids*. Springer-Verlag; :479-507. doi:10.1007/3-540-26573-2\_16
169. Fernández-Ruiz J, Moro MA, Martínez-Orgado J. Cannabinoids in Neurodegenerative Disorders and Stroke/Brain Trauma: From Preclinical Models to Clinical Applications. *Neurotherapeutics*. 2015;12(4):793-806. doi:10.1007/s13311-015-0381-7
170. Ferraro L, Tomasini MC, Beggiato S, et al. Short- and long-term consequences of prenatal exposure to the cannabinoid agonist WIN55,212-2 on rat glutamate transmission and cognitive functions. *J Neural Transm*. 2009;116(8):1017-1027. doi:10.1007/s00702-009-0230-0
171. Fife TD, Moawad H, Moschonas C, Shepard K, Hammond N. Clinical perspectives on medical marijuana (cannabis) for neurologic disorders. *Neurol Clin Pract*. 2015;5(4):344-351. doi:10.1212/CPJ.0000000000000162
172. Fijał K, Filip M. Clinical/Therapeutic Approaches for Cannabinoid Ligands in Central and Peripheral Nervous System Diseases. *Clin Neuropharmacol*. 2016;39(2):94-101. doi:10.1097/WNF.0000000000000132
173. Filloux FM. Cannabinoids for pediatric epilepsy? Up in smoke or real science? *Transl Pediatr*. 2015;4(4):271-282. doi:10.3978/j.issn.2224-4336.2015.10.03
174. Fine PG, Rosenfeld MJ. Cannabinoids for neuropathic pain. *Curr Pain Headache Rep*. 2014;18(10):451. doi:10.1007/s11916-014-0451-2
175. Fisher E, Moore RA, Fogarty AE, et al. Cannabinoids, cannabis, and cannabis-based medicine for pain management: a systematic review of randomised controlled trials. *Pain*. 2021;162. [https://journals.lww.com/pain/Fulltext/2021/07001/Cannabinoids,\\_cannabis,\\_and\\_cannabis\\_based.5.aspx](https://journals.lww.com/pain/Fulltext/2021/07001/Cannabinoids,_cannabis,_and_cannabis_based.5.aspx)
176. Fitzcharles M-A, Baerwald C, Ablin J, Häuser W. Efficacy, tolerability and safety of cannabinoids in chronic pain associated with rheumatic diseases (fibromyalgia syndrome, back pain, osteoarthritis, rheumatoid arthritis). *Der Schmerz*. 2016;30(1):47-61. doi:10.1007/s00482-015-0084-3
177. Fitzcharles M-A, Häuser W. Cannabinoids in the Management of Musculoskeletal or Rheumatic Diseases. *Curr Rheumatol Rep*. 2016;18(12):76. doi:10.1007/s11926-016-0625-5
178. Fitzcharles M-A, Ste-Marie PA, Häuser W, et al. Efficacy, Tolerability, and Safety of Cannabinoid Treatments in the Rheumatic Diseases: A Systematic Review of Randomized Controlled Trials. *Arthritis Care Res (Hoboken)*. 2016;68(5):681-688. doi:10.1002/acr.22727

179. Fitzcharles MA, Ste-Marie PA, Häuser W, et al. Efficacy, Tolerability, and Safety of Cannabinoid Treatments in the Rheumatic Diseases: A Systematic Review of Randomized Controlled Trials. *Arthritis Care Res.* 2016;68(5):681-688. doi:10.1002/acr.22727
180. Fleury M-J, Djouini A, Huynh C, et al. Remission from substance use disorders: A systematic review and meta-analysis. *Drug Alcohol Depend.* 2016;168:293-306. doi:10.1016/j.drugalcdep.2016.08.625
181. Fowler CJ. Plant-derived, synthetic and endogenous cannabinoids as neuroprotective agents. Non-psychoactive cannabinoids, “entourage” compounds and inhibitors of N-acyl ethanolamine breakdown as therapeutic strategies to avoid psychotropic effects. *Brain Res Brain Res Rev.* 2003;41(1):26-43. doi:10.1016/s0165-0173(02)00218-7
182. Frisher M, Crome I, Martino O, Croft P. Assessing the impact of cannabis use on trends in diagnosed schizophrenia in the United Kingdom from 1996 to 2005. *Schizophr Res.* 2009;113(2-3):123-128. doi:10.1016/j.schres.2009.05.031
183. Ghaffari BD, Kluger B. Mechanisms for Alternative Treatments in Parkinson’s Disease: Acupuncture, Tai Chi, and Other Treatments. *Curr Neurol Neurosci Rep.* 2014;14(6):451. doi:10.1007/s11910-014-0451-y
184. Gandhi S, Vasisth G, Kapoor A. Systematic review of the potential role of cannabinoids as antiproliferative agents for urological cancers. *Can Urol Assoc J.* 2017;11(3-4):138. doi:10.5489/cuaj.4371
185. Garay RP, Samalin L, Hameg A, Llorca P-M. Investigational drugs for anxiety in patients with schizophrenia. *Expert Opin Investig Drugs.* 2015;24(4):507-517. doi:10.1517/13543784.2014.987339
186. Garay RP, Citrome L, Grossberg GT, Cavero I, Llorca P-M. Investigational drugs for treating agitation in persons with dementia. *Expert Opin Investig Drugs.* 2016;25(8):973-983. doi:10.1080/13543784.2016.1193155
187. Garcia AN, Salloum IM. Polysomnographic sleep disturbances in nicotine, caffeine, alcohol, cocaine, opioid, and cannabis use: A focused review. *Am J Addict.* 2015;24(7):590-598. doi:10.1111/ajad.12291
188. García K, Rada G. Do cannabinoids have a role to play in Tourette’s syndrome? *Medwave.* 2016;16(Suppl5):e6793-e6793. doi:10.5867/medwave.2016.6793
189. Gates PJ, Albertella L, Copeland J. The effects of cannabinoid administration on sleep: a systematic review of human studies. *Sleep Med Rev.* 2014;18(6):477-487. doi:10.1016/j.smrv.2014.02.005
190. Giacoppo S, Bramanti P, Mazzon E. Sativex in the management of multiple sclerosis-related spasticity: An overview of the last decade of clinical evaluation. *Mult Scler Relat Disord.* 2017;17:22-31. doi:10.1016/j.msard.2017.06.015
191. Gloss D, Vickrey B. Cannabinoids for epilepsy. *Cochrane Database Syst Rev.* Published online March 2014. doi:10.1002/14651858.CD009270.pub3
192. Gobbi G, Atkin T, Zytynski T, et al. Association of Cannabis Use in Adolescence and Risk of Depression, Anxiety, and Suicidality in Young Adulthood: A Systematic Review and Meta-analysis. *JAMA Psychiatry.* 2019;76(4). doi:10.1001/jamapsychiatry.2018.4500

193. Godin S-L, Shehata S. Adolescent cannabis use and later development of schizophrenia: An updated systematic review of longitudinal studies. *J Clin Psychol.* 2022;n/a(n/a). doi:https://doi.org/10.1002/jclp.23312
194. Godsey J, Grundmann O. Review of Various Herbal Supplements as Complementary Treatments for Oral Cancer. *J Diet Suppl.* 2016;13(5):538-550. doi:10.3109/19390211.2015.1122693
195. Goldchluk A, Herbst L. [Permanent psychiatric effects in former addicts to marijuana or stimulants]. *Vertex.* 19(77):503-511.
196. Gómez Ochoa SA. Ictus y consumo de cannabis en pacientes sin factores de riesgo cardiovascular: revisión sistemática de casos clínicos. *Neurología.* 2021;36(3):222-228. doi:10.1016/j.nrl.2017.09.016
197. Gonzalez R. Acute and Non-acute Effects of Cannabis on Brain Functioning and Neuropsychological Performance. *Neuropsychol Rev.* 2007;17(3):347-361. doi:10.1007/s11065-007-9036-8
198. Gorey C, Kuhns L, Smaragdi E, Kroon E, Cousijn J. Age-related differences in the impact of cannabis use on the brain and cognition: a systematic review. *Eur Arch Psychiatry Clin Neurosci.* 2019;269(1):37-58. doi:10.1007/s00406-019-00981-7
199. Gorman DM, Derzon JH. Behavioral traits and marijuana use and abuse: a meta-analysis of longitudinal studies. *Addict Behav.* 2002;27(2):193-206. doi:10.1016/S0306-4603(00)00177-5
200. Gravas S, Dimitropoulos K. New therapeutic strategies for the treatment of male lower urinary tract symptoms. *Res Reports Urol.* Published online April 2016:51. doi:10.2147/RRU.S63446
201. Gruber AJ, Pope HG, Brown ME. Do patients use marijuana as an antidepressant? *Depression.* 1996;4(2):77-80. doi:10.1002/(SICI)1522-7162(1996)4:2<77::AID-DEPR7>3.0.CO;2-C
202. Beltramo M, Grundy RI, Rabuffetti M. Cannabinoids and Neuroprotection. *Mol Neurobiol.* 2001;24(1-3):029-052. doi:10.1385/MN:24:1-3:029
203. Guinguis R, Isabel Ruiz M, Rada G. Is cannabidiol an effective treatment for schizophrenia? *Medwave.* 2017;17(07):e7010-e7010. doi:10.5867/medwave.2017.07.7010
204. Gully M, Frauger É, Spadari M, et al. Effets uro-néphrologiques des produits utilisés par les usagers de drogues : revue de la littérature et enquête pharmaco-épidémiologique en France et dans la région de Marseille. *Néphrologie & Thérapeutique.* 2017;13(6):429-438. doi:10.1016/j.nephro.2017.01.024
205. Gunn JKL, Rosales CB, Center KE, Nunez A V., Gibson SJ, Ehiri JE. The effects of prenatal cannabis exposure on fetal development and pregnancy outcomes: a protocol. *BMJ Open.* 2015;5(3):e007227-e007227. doi:10.1136/bmjopen-2014-007227
206. Gurney SMR, Scott KS, Kacinko SL, Presley BC, Logan BK. Pharmacology, Toxicology, and Adverse Effects of Synthetic Cannabinoid Drugs. *Forensic Sci Rev.* 2014;26(1):53-78.
207. Haffar S, Murad MH, Bazerbachi F. Cannabis-induced Acute Pancreatitis. *Pancreas.* 2018;47(6):e31-e31. doi:10.1097/MPA.0000000000001057
208. Hall W, Degenhardt L. Cannabis Use and Psychosis: A Review of Clinical and Epidemiological Evidence. *Aust New Zeal J Psychiatry.* 2000;34(1):26-34. doi:10.1046/j.1440-1614.2000.00685.x

209. Hall W, Christie M, Currow D. Cannabinoids and cancer: causation, remediation, and palliation. *Lancet Oncol.* 2005;6(1):35-42. doi:10.1016/S1470-2045(04)01711-5
210. Hall WD. Cannabis use and the Mental Health of Young People. *Aust New Zeal J Psychiatry.* 2006;40(2):105-113. doi:10.1080/j.1440-1614.2006.01756.x
211. Hammond S, Erridge S, Mangal N, Pacchetti B, Sodergren MH. The Effect of Cannabis-Based Medicine in the Treatment of Cachexia: A Systematic Review and Meta-Analysis. *Cannabis Cannabinoid Res.* 2021;6(6):474-487. doi:10.1089/can.2021.0048
212. Harrison AM, Heritier F, Childs BG, Bostwick JM, Dziadzko MA. Systematic Review of the Use of Phytochemicals for Management of Pain in Cancer Therapy. *Biomed Res Int.* 2015;2015:1-8. doi:10.1155/2015/506327
213. Hasenoehrl C, Storr M, Schicho R. Cannabinoids for treating inflammatory bowel diseases: where are we and where do we go? *Expert Rev Gastroenterol Hepatol.* 2017;11(4):329-337. doi:10.1080/17474124.2017.1292851
214. Hashibe M, Straif K, Tashkin DP, Morgenstern H, Greenland S, Zhang Z-F. Epidemiologic review of marijuana use and cancer risk. *Alcohol.* 2005;35(3):265-275. doi:10.1016/j.alcohol.2005.04.008
215. Häuser W, Fitzcharles M-A, Radbruch L, Petzke F. Cannabinoids in Pain Management and Palliative Medicine. *Dtsch Aerzteblatt Online.* Published online September 2017. doi:10.3238/arztebl.2017.0627
216. Häuser W, Petzke F, Fitzcharles MA. Efficacy, tolerability and safety of cannabis-based medicines for chronic pain management - An overview of systematic reviews. *Eur J Pain.* 2018;22(3):455-470. doi:10.1002/ejp.1118
217. Hedlund P. Cannabinoids and the endocannabinoid system in lower urinary tract function and dysfunction. *Neurourol Urodyn.* 2014;33(1):46-53. doi:10.1002/nau.22442
218. Hendren G, Aponte-Feliciano A, Kovac A. Safety and efficacy of commonly used antiemetics. *Expert Opin Drug Metab Toxicol.* 2015;11(11):1753-1767. doi:10.1517/17425255.2015.1080688
219. Henquet C. The Environment and Schizophrenia: The Role of Cannabis Use. *Schizophr Bull.* 2005;31(3):608-612. doi:10.1093/schbul/sbi027
220. Hill KP. Medical Marijuana for Treatment of Chronic Pain and Other Medical and Psychiatric Problems. *JAMA.* 2015;313(24):2474. doi:10.1001/jama.2015.6199
221. Hill KP, Palastro MD, Johnson B, Ditre JW. Cannabis and Pain: A Clinical Review. *Cannabis Cannabinoid Res.* 2017;2(1):96-104. doi:10.1089/can.2017.0017
222. Hjorthøj CR, Hjorthøj AR, Nordentoft M. Validity of Timeline Follow-Back for self-reported use of cannabis and other illicit substances — Systematic review and meta-analysis. *Addict Behav.* 2012;37(3):225-233. doi:10.1016/j.addbeh.2011.11.025
223. Hobbs M, Kalk NJ, Morrison PD, Stone JM. Spicing it up - synthetic cannabinoid receptor agonists and psychosis - a systematic review. *Eur Neuropsychopharmacol.* 2018;28(12):1289-1304. doi:10.1016/j.euroneuro.2018.10.004
224. Hoch E, Bonnetn U, Thomasius R, Ganzer F, Havemann-Reinecke U, Preuss UW. Risks associated with the non-medicinal use of cannabis. *Dtsch Arztebl Int.* 2015;112(16):271-278. doi:10.3238/arztebl.2015.0271

225. Hoch E, Niemann D, von Keller R, et al. How effective and safe is medical cannabis as a treatment of mental disorders? A systematic review. *Eur Arch Psychiatry Clin Neurosci*. 2019;269(1):87-105. doi:10.1007/s00406-019-00984-4
226. Hohmann N, Mikus G, Czock D. Effects and Risks Associated with Novel Psychoactive Substances. *Dtsch Aerzteblatt Online*. Published online February 2014. doi:10.3238/arztebl.2014.0139
227. Holitzki H, Dowsett LE, Spackman E, Noseworthy T, Clement F. Health effects of exposure to second- and third-hand marijuana smoke: a systematic review. *C Open*. 2017;5(4):E814-E822. doi:10.9778/cmajo.20170112
228. Horwood LJ, Fergusson DM, Hayatbakhsh MR, et al. Cannabis use and educational achievement: Findings from three Australasian cohort studies. *Drug Alcohol Depend*. 2010;110(3):247-253. doi:https://doi.org/10.1016/j.drugalcdep.2010.03.008
229. Hosseini S, Oremus M. The Effect of Age of Initiation of Cannabis Use on Psychosis, Depression, and Anxiety among Youth under 25 Years. *Can J Psychiatry*. 2019;64(5):304-312. doi:10.1177/0706743718809339
230. Hostiu S, Moldoveanu A, Negoii I, Drima E. Corrigendum: The Association of Unfavorable Traffic Events and Cannabis Usage: A Meta-Analysis. *Front Pharmacol*. 2018;9:564. doi:10.3389/fphar.2018.00564
231. Houzé B, El-Khatib H, Arbour C. Efficacy, tolerability, and safety of non-pharmacological therapies for chronic pain: An umbrella review on various CAM approaches. *Prog Neuro-Psychopharmacology Biol Psychiatry*. 2017;79:192-205. doi:10.1016/j.pnpbp.2017.06.035
232. Houzé B, El-Khatib H, Arbour C. Reprint of: Efficacy, tolerability, and safety of non-pharmacological therapies for chronic pain: An umbrella review on various CAM approaches. *Prog Neuropsychopharmacol Biol Psychiatry*. 2018;87(Pt B):307-321. doi:10.1016/j.pnpbp.2018.08.002
233. Hoyte CO, Jacob J, Monte AA, Al-Jumaan M, Bronstein AC, Heard KJ. A Characterization of Synthetic Cannabinoid Exposures Reported to the National Poison Data System in 2010. *Ann Emerg Med*. 2012;60(4):435-438. doi:10.1016/j.annemergmed.2012.03.007
234. Huemer HP. Possible Immunosuppressive Effects of Drug Exposure and Environmental and Nutritional Effects on Infection and Vaccination. *Mediators Inflamm*. 2015;2015:1-7. doi:10.1155/2015/349176
235. Huizink AC. Prenatal cannabis exposure and infant outcomes: Overview of studies. *Prog Neuro-Psychopharmacology Biol Psychiatry*. 2014;52:45-52. doi:10.1016/j.pnpbp.2013.09.014
236. Hummel A, Shelton KH, Heron J, Moore L, van den Bree MBM. A systematic review of the relationships between family functioning, pubertal timing and adolescent substance use. *Addiction*. 2013;108(3):487-496. doi:10.1111/add.12055
237. Humphreys KL, Eng T, Lee SS. Stimulant medication and substance use outcomes: a meta-analysis. *JAMA psychiatry*. 2013;70(7):740-749. doi:10.1001/jamapsychiatry.2013.1273
238. Hunt GE, Large MM, Cleary M, Lai HMX, Saunders JB. Prevalence of comorbid substance use in schizophrenia spectrum disorders in community and clinical settings, 1990–2017: Systematic review and meta-analysis. *Drug Alcohol Depend*. 2018;191:234-258. doi:10.1016/j.drugalcdep.2018.07.011

239. Hyman SM, Sinha R. Stress-related factors in cannabis use and misuse: Implications for prevention and treatment. *J Subst Abuse Treat.* 2009;36(4):400-413. doi:10.1016/j.jsat.2008.08.005
240. Iffland K, Grotenhermen F. An Update on Safety and Side Effects of Cannabidiol: A Review of Clinical Data and Relevant Animal Studies. *Cannabis Cannabinoid Res.* 2017;2(1):139-154. doi:10.1089/can.2016.0034
241. Irner TB. Substance exposure in utero and developmental consequences in adolescence: A systematic review. *Child Neuropsychol.* 2012;18(6):521-549. doi:10.1080/09297049.2011.628309
242. Iskedjian M, Bereza B, Gordon A, Piwko C, Einarson TR. Meta-analysis of cannabis based treatments for neuropathic and multiple sclerosis-related pain. *Curr Med Res Opin.* 2007;23(1):17-24. doi:10.1185/030079906X158066
243. Iyalomhe G. Cannabis abuse and addiction: A contemporary literature review. *Niger J Med.* 2009;18(2). doi:10.4314/njm.v18i2.45050
244. Izzo AA, Camilleri M. Emerging role of cannabinoids in gastrointestinal and liver diseases: basic and clinical aspects. *Gut.* 2008;57(8):1140-1155. doi:10.1136/gut.2008.148791
245. Jacobson MR, Watts JJ, Boileau I, Tong J, Mizrahi R. A systematic review of phytocannabinoid exposure on the endocannabinoid system: Implications for psychosis. *Eur Neuropsychopharmacol.* 2019;29(3):330-348. doi:10.1016/j.euroneuro.2018.12.014
246. Jaques SC, Kingsbury A, Henshcke P, et al. Cannabis, the pregnant woman and her child: weeding out the myths. *J Perinatol.* 2014;34(6):417-424. doi:10.1038/jp.2013.180
247. Jager G, Ramsey N. Long-Term Consequences of Adolescent Cannabis Exposure on the Development of Cognition, Brain Structure and Function: An Overview of Animal and Human Research. *Curr Drug Abuse Rev.* 2008;1(2):114-123. doi:10.2174/1874473710801020114
248. James A, James C, Thwaites T. The brain effects of cannabis in healthy adolescents and in adolescents with schizophrenia: a systematic review. *Psychiatry Res Neuroimaging.* 2013;214(3):181-189. doi:10.1016/j.pscychresns.2013.07.012
249. Jawahar R, Oh U, Yang S, Lapane KL. A Systematic Review of Pharmacological Pain Management in Multiple Sclerosis. *Drugs.* 2013;73(15):1711-1722. doi:10.1007/s40265-013-0125-0
250. Jensen B, Chen J, Furnish T, Wallace M. Medical Marijuana and Chronic Pain: a Review of Basic Science and Clinical Evidence. *Curr Pain Headache Rep.* 2015;19(10):50. doi:10.1007/s11916-015-0524-x
251. Johns A. Psychiatric effects of cannabis. *Br J Psychiatry.* 2001;178(2):116-122. doi:10.1192/bjp.178.2.116
252. Jónsson AJ, Birgisdóttir H, Sigurðsson E. Eykur notkun kannabis hættu á geðrofi og þróun geðklofa? *Læknablaðið.* 2014;2014(09):443-451. doi:10.17992/lbl.2014.09.556
253. Joshi M, Joshi A, Bartter T. Marijuana and lung diseases. *Curr Opin Pulm Med.* 2014;20(2):173-179. doi:10.1097/MCP.000000000000026
254. Jouanjus E, Raymond V, Lapeyre-Mestre M, Wolff V. What is the Current Knowledge About the Cardiovascular Risk for Users of Cannabis-Based Products? A Systematic Review. *Curr Atheroscler Rep.* 2017;19(6):26. doi:10.1007/s11883-017-0663-0



255. Jung Y, St. Louis EK. Treatment of REM Sleep Behavior Disorder. *Curr Treat Options Neurol*. 2016;18(11):50. doi:10.1007/s11940-016-0433-2
256. Jutras-Aswad D, DiNieri JA, Harkany T, Hurd YL. Neurobiological consequences of maternal cannabis on human fetal development and its neuropsychiatric outcome. *Eur Arch Psychiatry Clin Neurosci*. 2009;259(7):395-412. doi:10.1007/s00406-009-0027-z
257. Kafil TS, Nguyen TM, MacDonald JK, Chande N. Cannabis for the treatment of ulcerative colitis. *Cochrane Database Syst Rev*. Published online November 2018. doi:10.1002/14651858.CD012954.pub2
258. Kafil TS, Nguyen TM, MacDonald JK, Chande N. Cannabis for the treatment of Crohn's disease. *Cochrane database Syst Rev*. 2018;11(11):CD012853-CD012853. doi:10.1002/14651858.CD012853.pub2
259. Kahan M, Srivastava A, Spithoff S, Bromley L. Prescribing smoked cannabis for chronic noncancer pain: preliminary recommendations. *Can Fam Physician*. 2014;60(12):1083-1090.
260. Kanit M, Sana M, Bani T, Laqueille X. Cannabis et grossesse : actualités et expériences cliniques. *Ann Médico-psychologiques, Rev Psychiatr*. 2009;167(7):539-540. doi:10.1016/j.amp.2009.07.001
261. Karila L, Roux P, Rolland B, et al. Acute and long-term effects of cannabis use: a review. *Curr Pharm Des*. 2014;20(25):4112-4118. doi:10.2174/13816128113199990620
262. Karl T, Garner B, Cheng D. The therapeutic potential of the phytocannabinoid cannabidiol for Alzheimer's disease. *Behav Pharmacol*. 2017;28(2 and 3):142-160. doi:10.1097/FBP.0000000000000247
263. Katchan V, David P, Shoenfeld Y. Cannabinoids and autoimmune diseases: A systematic review. *Autoimmun Rev*. 2016;15(6):513-528. doi:10.1016/j.autrev.2016.02.008
264. Katona I. Cannabis and Endocannabinoid Signaling in Epilepsy. In: ; 2015:285-316. doi:10.1007/978-3-319-20825-1\_10
265. Katzberg HD. Neurogenic muscle cramps. *J Neurol*. 2015;262(8):1814-1821. doi:10.1007/s00415-015-7659-x
266. Keating GM. Delta-9-Tetrahydrocannabinol/Cannabidiol Oromucosal Spray (Sativex®): A Review in Multiple Sclerosis-Related Spasticity. *Drugs*. 2017;77(5):563-574. doi:10.1007/s40265-017-0720-6
267. Kedzior KK, Laeber LT. A positive association between anxiety disorders and cannabis use or cannabis use disorders in the general population- a meta-analysis of 31 studies. *BMC Psychiatry*. 2014;14(1):136. doi:10.1186/1471-244X-14-136
268. Keen L, Abbate A, Blanden G, Priddie C, Moeller FG, Rathore M. Confirmed marijuana use and lymphocyte count in black people living with HIV. *Drug Alcohol Depend*. 2019;198:112-115. doi:10.1016/j.drugalcdep.2018.11.018
269. Kennedy MC. Cannabis: Exercise performance and sport. A systematic review. *J Sci Med Sport*. 2017;20(9):825-829. doi:10.1016/j.jsams.2017.03.012

270. Kerbage H, Richa S. Non-Antidepressant Long-term Treatment in Post-Traumatic Stress Disorder (PTSD). *Curr Clin Pharmacol*. 2015;10(2):116-125. doi:10.2174/157488471002150723122127
271. Khan A, Corbett A, Ballard C. Emerging treatments for Alzheimer's disease for non-amyloid and non-tau targets. *Expert Rev Neurother*. 2017;17(7):683-695. doi:10.1080/14737175.2017.1326818
272. Khoury JM, Neves M de CL das, Roque MAV, et al. Is there a role for cannabidiol in psychiatry? *World J Biol Psychiatry*. 2019;20(2):101-116. doi:10.1080/15622975.2017.1285049
273. Medical use of cannabis in Switzerland: analysis of approved exceptional licences. *Swiss Med Wkly*. 2017;147(2728). doi:10.4414/smw.2017.14463
274. Kluger B, Triolo P, Jones W, Jankovic J. The therapeutic potential of cannabinoids for movement disorders. *Mov Disord*. 2015;30(3):313-327. doi:10.1002/mds.26142
275. Koek RJ, Schwartz HN, Scully S, et al. Treatment-refractory posttraumatic stress disorder (TRPTSD): a review and framework for the future. *Prog Neuro-Psychopharmacology Biol Psychiatry*. 2016;70:170-218. doi:10.1016/j.pnpbp.2016.01.015
276. Kokona A, Tarricone I, Di Forti M, Carra E. Cannabis, Migration, and Psychosis Onset. In: *Handbook of Cannabis and Related Pathologies*. Elsevier; 2017:79-88. doi:10.1016/B978-0-12-800756-3.00010-7
277. Koppel BS, Brust JCM, Fife T, et al. Systematic review: Efficacy and safety of medical marijuana in selected neurologic disorders: Report of the Guideline Development Subcommittee of the American Academy of Neurology. *Neurology*. 2014;82(17):1556-1563. doi:10.1212/WNL.0000000000000363
278. Koppel BS. Cannabis in the Treatment of Dystonia, Dyskinesias, and Tics. *Neurotherapeutics*. 2015;12(4):788-792. doi:10.1007/s13311-015-0376-4
279. Korantzopoulos P, Liu T, Papaioannides D, Li G, Goudevenos JA. Atrial fibrillation and marijuana smoking. *Int J Clin Pract*. 2007;62(2):308-313. doi:10.1111/j.1742-1241.2007.01505.x
280. Kosiba JD, Maisto SA, Ditre JW. Patient-reported use of medical cannabis for pain, anxiety, and depression symptoms: Systematic review and meta-analysis. *Soc Sci Med*. 2019;233:181-192. doi:10.1016/j.socscimed.2019.06.005
281. Koskinen J, Lohonen J, Koponen H, Isohanni M, Miettunen J. Rate of Cannabis Use Disorders in Clinical Samples of Patients With Schizophrenia: A Meta-analysis. *Schizophr Bull*. 2010;36(6):1115-1130. doi:10.1093/schbul/sbp031
282. Kreitzer FR, Stella N. The therapeutic potential of novel cannabinoid receptors. *Pharmacol Ther*. 2009;122(2):83-96. doi:10.1016/j.pharmthera.2009.01.005
283. Krishnan S, Cairns R, Howard R. Cannabinoids for the treatment of dementia. *Cochrane Database Syst Rev*. Published online April 2009. doi:10.1002/14651858.CD007204.pub2
284. Kristanc L, Kreft S. European medicinal and edible plants associated with subacute and chronic toxicity part II: Plants with hepato-, neuro-, nephro- and immunotoxic effects. *Food Chem Toxicol*. 2016;92:38-49. doi:10.1016/j.fct.2016.03.014
285. Ksir C, Hart CL. Cannabis and Psychosis: a Critical Overview of the Relationship. *Curr Psychiatry Rep*. 2016;18(2):12. doi:10.1007/s11920-015-0657-y

286. Kucerova J, Tabiova K, Drago F, Micale V. Therapeutic Potential of Cannabinoids in Schizophrenia. *Recent Pat CNS Drug Discov.* 2014;9(1):13-25. doi:10.2174/1574889809666140307115532
287. Kuczkowski KM. Marijuana in pregnancy. *Ann Acad Med Singapore.* 2004;33(3):336-339.
288. Kumar A, Pottabathini R, Bhatnagar A, Garg S, Gupta V. Pharmacological Management of Neuropathic Pain: Current Trends and Possible Approaches. *Arch Neurosci.* 2016;4(1). doi:10.5812/archneurosci.28998
289. La Porta C, Bura SA, Negrete R, Maldonado R. Involvement of the endocannabinoid system in osteoarthritis pain. *Eur J Neurosci.* 2014;39(3):485-500. doi:10.1111/ejn.12468
290. Lago E, Fernandez-Ruiz J. Cannabinoids and Neuroprotection in Motor-Related Disorders. *CNS Neurol Disord - Drug Targets.* 2007;6(6):377-387. doi:10.2174/187152707783399210
291. Lakhan SE, Rowland M. Whole plant cannabis extracts in the treatment of spasticity in multiple sclerosis: a systematic review. *BMC Neurol.* 2009;9(1):59. doi:10.1186/1471-2377-9-59
292. Lamy S, Laqueille X, Thibaut F. Conséquences potentielles de la consommation de tabac, de cannabis et de cocaïne par la femme enceinte sur la grossesse, le nouveau-né et l'enfant : revue de littérature. *Encephale.* 2015;41:S13-S20. doi:10.1016/j.encep.2014.08.012
293. Langhorst J, Wulfert H, Lauche R, et al. Systematic Review of Complementary and Alternative Medicine Treatments in Inflammatory Bowel Diseases. *J Crohn's Colitis.* 2015;9(1):86-106. doi:10.1093/ecco-jcc/jju007
294. Lanza G, Ferri R, Bella R, Ferini-Strambi L. The impact of drugs for multiple sclerosis on sleep. *Mult Scler J.* 2017;23(1):5-13. doi:10.1177/1352458516664034
295. Large MM, Smith G, Sara G, Paton MB, Kedzior KK, Nielssen OB. Meta-analysis of self-reported substance use compared with laboratory substance assay in general adult mental health settings. *Int J Methods Psychiatr Res.* 2012;21(2):134-148. doi:10.1002/mpr.1350
296. Lattanzi S, Brigo F, Trinkka E, et al. Efficacy and Safety of Cannabidiol in Epilepsy: A Systematic Review and Meta-Analysis. *Drugs.* 2018;78(17):1791-1804. doi:10.1007/s40265-018-0992-5
297. Laviolette SR, Grace AA. The roles of cannabinoid and dopamine receptor systems in neural emotional learning circuits: implications for schizophrenia and addiction. *Cell Mol Life Sci.* 2006;63(14):1597-1613. doi:10.1007/s00018-006-6027-5
298. Le Bec P-Y, Fatséas M, Denis C, Lavie E, Auriacombe M. Cannabis et psychose : recherche d'un lien de causalité à partir d'une revue critique systématique de la littérature. *Encephale.* 2009;35(4):377-385. doi:10.1016/j.encep.2008.02.012
299. Lee SS, Humphreys KL, Flory K, Liu R, Glass K. Prospective association of childhood attention-deficit/hyperactivity disorder (ADHD) and substance use and abuse/dependence: a meta-analytic review. *Clin Psychol Rev.* 2011;31(3):328-341. doi:10.1016/j.cpr.2011.01.006
300. Lee G, Grovey B, Furnish T, Wallace M. Medical Cannabis for Neuropathic Pain. *Curr Pain Headache Rep.* 2018;22(1):8. doi:10.1007/s11916-018-0658-8
301. Levine A, Clemenza K, Rynn M, Lieberman J. Evidence for the Risks and Consequences of Adolescent Cannabis Exposure. *J Am Acad Child Adolesc Psychiatry.* 2017;56(3):214-225. doi:10.1016/j.jaac.2016.12.014

302. Li M-C, Brady JE, DiMaggio CJ, Lusardi AR, Tzong KY, Li G. Marijuana Use and Motor Vehicle Crashes. *Epidemiol Rev.* 2012;34(1):65-72. doi:10.1093/epirev/mxr017
303. Lim K, See YM, Lee J. A Systematic Review of the Effectiveness of Medical Cannabis for Psychiatric, Movement and Neurodegenerative Disorders. *Clin Psychopharmacol Neurosci.* 2017;15(4):301-312. doi:10.9758/cpn.2017.15.4.301
304. Linszen D, van Amelsvoort T. Cannabis and psychosis: an update on course and biological plausible mechanisms. *Curr Opin Psychiatry.* 2007;20(2):116-120. doi:10.1097/YCO.0b013e32803577fb
305. Lisowska A, Makarewicz-Wujec M, Kozłowska-Wojciechowska M. Can “Legal Highs” Trigger Myocardial Infarction? Patients’ Characteristics Based on Published Cases. *Subst Use Misuse.* 2017;52(13):1712-1720. doi:10.1080/10826084.2017.1306565
306. S. Liu C, Ruthirakuhan M, A. Chau S, Herrmann N, F. Carvalho A, L. Lanctôt K. Pharmacological Management of Agitation and Aggression in Alzheimer’s Disease: A Review of Current and Novel Treatments. *Curr Alzheimer Res.* 2016;13(10):1134-1144. doi:10.2174/1567205013666160502122933
307. Lochte BC, Beletsky A, Samuel NK, Grant I. The Use of Cannabis for Headache Disorders. *Cannabis Cannabinoid Res.* 2017;2(1):61-71. doi:10.1089/can.2016.0033
308. Loeber RT, Yurgelun-Todd DA. Human neuroimaging of acute and chronic marijuana use: implications for frontocerebellar dysfunction. *Hum Psychopharmacol Clin Exp.* 1999;14(5):291-304. doi:10.1002/(SICI)1099-1077(199907)14:5<291::AID-HUP100>3.0.CO;2-H
309. Løberg E-M. Cannabis use and cognition in schizophrenia. *Front Hum Neurosci.* 2009;3. doi:10.3389/neuro.09.053.2009
310. Lorenzetti V, Lubman DI, Fornito A, et al. The Impact of Regular Cannabis Use on the Human Brain. In: *Biological Research on Addiction.* Elsevier; 2013:711-728. doi:10.1016/B978-0-12-398335-0.00069-8
311. Lorenzetti V, Solowij N, Fornito A, Lubman D, Yücel M. The Association between Regular Cannabis Exposure and Alterations of Human Brain Morphology: An Updated Review of the Literature. *Curr Pharm Des.* 2014;20(13):2138-2167. doi:10.2174/13816128113199990435
312. Lorenzetti V, Solowij N, Yücel M. The Role of Cannabinoids in Neuroanatomic Alterations in Cannabis Users. *Biol Psychiatry.* 2016;79(7):e17-e31. doi:10.1016/j.biopsych.2015.11.013
313. Lorenzetti V, Alonso-Lana S, Youssef G, et al. Adolescent Cannabis Use: What is the Evidence for Functional Brain Alteration? *Curr Pharm Des.* 2017;22(42):6353-6365. doi:10.2174/1381612822666160805155922
314. Lorenzetti V, Chye Y, Silva P, Solowij N, Roberts CA. Does regular cannabis use affect neuroanatomy? An updated systematic review and meta-analysis of structural neuroimaging studies. *Eur Arch Psychiatry Clin Neurosci.* 2019;269(1):59-71. doi:10.1007/s00406-019-00979-1
315. Lötsch J, Weyer-Menkhoff I, Tegeder I. Current evidence of cannabinoid-based analgesia obtained in preclinical and human experimental settings. *Eur J Pain.* 2018;22(3):471-484. doi:10.1002/ejp.1148
316. Lubman DI, Cheetham A, Yücel M. Cannabis and adolescent brain development. *Pharmacol Ther.* 2015;148:1-16. doi:10.1016/j.pharmthera.2014.11.009

317. Lutge EE, Gray A, Siegfried N. The medical use of cannabis for reducing morbidity and mortality in patients with HIV/AIDS. *Cochrane Database Syst Rev*. Published online April 2013. doi:10.1002/14651858.CD005175.pub3
318. Lynch ME, Campbell F. Cannabinoids for treatment of chronic non-cancer pain; a systematic review of randomized trials. *Br J Clin Pharmacol*. 2011;72(5):735-744. doi:10.1111/j.1365-2125.2011.03970.x
319. Lynch ME, Ware MA. Cannabinoids for the Treatment of Chronic Non-Cancer Pain: An Updated Systematic Review of Randomized Controlled Trials. *J Neuroimmune Pharmacol*. 2015;10(2):293-301. doi:10.1007/s11481-015-9600-6
320. Lynch ME. Cannabinoids in the management of chronic pain: a front line clinical perspective. *J Basic Clin Physiol Pharmacol*. 2016;27(3). doi:10.1515/jbcpp-2015-0059
321. Maccarrone M, Wenger T. Effects of Cannabinoids on Hypothalamic and Reproductive Function. In: *Cannabinoids*. Springer-Verlag; :555-571. doi:10.1007/3-540-26573-2\_18
322. Macdonald S, Hall W, Roman P, Stockwell T, Coghlan M, Nesvaag S. Testing for cannabis in the work-place: a review of the evidence. *Addiction*. 2010;105(3):408-416. doi:10.1111/j.1360-0443.2009.02808.x
323. MacDonald K, Pappas K. WHY NOT POT?: A Review of the Brain-based Risks of Cannabis. *Innov Clin Neurosci*. 13(3-4):13-22.
324. MACHADO ROCHA FC, STÉFANO SC, DE CÁSSIA HAIEK R, ROSA OLIVEIRA LMQ, DA SILVEIRA DX. Therapeutic use of Cannabis sativa on chemotherapy-induced nausea and vomiting among cancer patients: systematic review and meta-analysis. *Eur J Cancer Care (Engl)*. 2008;17(5):431-443. doi:10.1111/j.1365-2354.2008.00917.x
325. Macleod J, Oakes R, Copello A, et al. Psychological and social sequelae of cannabis and other illicit drug use by young people: a systematic review of longitudinal, general population studies. *Lancet*. 2004;363(9421):1579-1588. doi:10.1016/S0140-6736(04)16200-4
326. Macleod J, Smith GD, Hickman M. Does cannabis use cause schizophrenia? *Lancet*. 2006;367(9516):1055. doi:10.1016/S0140-6736(06)68468-7
327. Malchow B, Hasan A, Fusar-Poli P, Schmitt A, Falkai P, Wobrock T. Cannabis abuse and brain morphology in schizophrenia: a review of the available evidence. *Eur Arch Psychiatry Clin Neurosci*. 2013;263(1):3-13. doi:10.1007/s00406-012-0346-3
328. Maldonado R, Valverde O. Participation of the opioid system in cannabinoid-induced antinociception and emotional-like responses. *Eur Neuropsychopharmacol*. 2003;13(6):401-410. doi:10.1016/j.euroneuro.2003.08.001
329. Mammen G, Rueda S, Roerecke M, Bonato S, Lev-Ran S, Rehm J. Association of Cannabis With Long-Term Clinical Symptoms in Anxiety and Mood Disorders. *J Clin Psychiatry*. 2018;79(4). doi:10.4088/JCP.17r11839
330. Mammen G, Rueda S, Roerecke M, Bonato S, Lev-Ran S, Rehm J. Association of Cannabis With Long-Term Clinical Symptoms in Anxiety and Mood Disorders: A Systematic Review of Prospective Studies. *J Clin Psychiatry*. 2018;79(4). doi:10.4088/JCP.17r11839

331. Mandelbaum DE, de la Monte SM. Adverse Structural and Functional Effects of Marijuana on the Brain: Evidence Reviewed. *Pediatr Neurol*. 2017;66:12-20. doi:10.1016/j.pediatrneurol.2016.09.004
332. Maniglio R. Association between peer victimization in adolescence and cannabis use: A systematic review. *Aggress Violent Behav*. 2015;25:252-258. doi:10.1016/j.avb.2015.09.002
333. Marangoni C, Hernandez M, Faedda GL. The role of environmental exposures as risk factors for bipolar disorder: A systematic review of longitudinal studies. *J Affect Disord*. 2016;193:165-174. doi:10.1016/j.jad.2015.12.055
334. Marconi A, Di Forti M, Lewis CM, Murray RM, Vassos E. Meta-analysis of the Association Between the Level of Cannabis Use and Risk of Psychosis. *Schizophr Bull*. 2016;42(5):1262-1269. doi:10.1093/schbul/sbw003
335. Martinasek MP, McGrogan JB, Maysonet A. A Systematic Review of the Respiratory Effects of Inhalational Marijuana. *Respir Care*. 2016;61(11):1543-1551. doi:10.4187/respcare.04846
336. Martinotti G, Santacroce R, Papanti D, Elgharably Y, Prilutskaya M, Corazza O. Synthetic Cannabinoids: Psychopharmacology, Clinical Aspects, Psychotic Onset. *CNS Neurol Disord - Drug Targets*. 2017;16(5). doi:10.2174/1871527316666170413101839
337. Martín-Sánchez E, Furukawa TA, Taylor J, Martin JLR. Systematic Review and Meta-analysis of Cannabis Treatment for Chronic Pain. *Pain Med*. 2009;10(8):1353-1368. doi:10.1111/j.1526-4637.2009.00703.x
338. Martín-Santos R, Fagundo AB, Crippa JA, et al. Neuroimaging in cannabis use: a systematic review of the literature. *Psychol Med*. 2010;40(3):383-398. doi:10.1017/S0033291709990729
339. Massi P, Solinas M, Cinquina V, Parolaro D. Cannabidiol as potential anticancer drug. *Br J Clin Pharmacol*. 2013;75(2):303-312. doi:10.1111/j.1365-2125.2012.04298.x
340. Mather L. Cannabinoid pharmacotherapy: past, present and future. *Minerva Anesthesiol*. 71(7-8):405-412.
341. Matheson SL, Shepherd AM, Carr VJ. How much do we know about schizophrenia and how well do we know it? Evidence from the Schizophrenia Library. *Psychol Med*. 2014;44(16):3387-3405. doi:10.1017/S0033291714000166
342. Maule WJ. Medical uses of marijuana ( Cannabis sativa ): fact or fallacy? *Br J Biomed Sci*. 2015;72(2):85-91. doi:10.1080/09674845.2015.11666802
343. McCartney D, Arkell TR, Irwin C, Kevin RC, McGregor IS. Are blood and oral fluid  $\Delta^9$ -tetrahydrocannabinol (THC) and metabolite concentrations related to impairment? A meta-regression analysis. *Neurosci Biobehav Rev*. 2022;134:104433. doi:https://doi.org/10.1016/j.neubiorev.2021.11.004
344. McElroy SL, Guerdjikova AI, Mori N, Keck PE. Psychopharmacologic Treatment of Eating Disorders: Emerging Findings. *Curr Psychiatry Rep*. 2015;17(5):35. doi:10.1007/s11920-015-0573-1
345. McKenna GJ. The current status of medical marijuana in the United States. *Hawaii J Med Public Health*. 2014;73(4):105-108. doi:24765557
346. McLachlan RS. Marijuana: A Time-Honored but Untested Treatment for Epilepsy. *Can J Neurol Sci / J Can des Sci Neurol*. 2015;42(2):88-91. doi:10.1017/cjn.2015.11

347. McLaren JA, Silins E, Hutchinson D, Mattick RP, Hall W. Assessing evidence for a causal link between cannabis and psychosis: A review of cohort studies. *Int J Drug Policy*. 2010;21(1):10-19. doi:10.1016/j.drugpo.2009.09.001
348. McLoughlin BC, Pushpa-Rajah JA, Gillies D, et al. Cannabis and schizophrenia. *Cochrane Database Syst Rev*. Published online October 2014. doi:10.1002/14651858.CD004837.pub3
349. Mechoulam R, Hanuš L. Cannabidiol: an overview of some chemical and pharmacological aspects. Part I: chemical aspects. *Chem Phys Lipids*. 2002;121(1-2):35-43. doi:10.1016/S0009-3084(02)00144-5
350. Mendiguren A, Aostri E, Pineda J. Regulation of noradrenergic and serotonergic systems by cannabinoids: relevance to cannabinoid-induced effects. *Life Sci*. 2018;192:115-127. doi:10.1016/j.lfs.2017.11.029
351. Meng H, Johnston B, Englesakis M, Moulin DE, Bhatia A. Selective Cannabinoids for Chronic Neuropathic Pain. *Anesth Analg*. 2017;125(5):1638-1652. doi:10.1213/ANE.0000000000002110
352. Merlin JS, Bulls HW, Vucovich LA, Edelman EJ, Starrels JL. Pharmacologic and non-pharmacologic treatments for chronic pain in individuals with HIV: a systematic review. *AIDS Care*. 2016;28(12):1506-1515. doi:10.1080/09540121.2016.1191612
353. Merlob P, Stahl B, Klinger G. For Debate: Does Cannabis Use by the Pregnant Mother Affect the Fetus and Newborn? *Pediatr Endocrinol Rev*. 2017;15(1):4-7. doi:10.17458/per.vol15.2017.msk.fd.cannabispregnantmother
354. Metz TD, Stickrath EH. Marijuana use in pregnancy and lactation: a review of the evidence. *Am J Obstet Gynecol*. 2015;213(6):761-778. doi:10.1016/j.ajog.2015.05.025
355. Mehra R, Moore BA, Crothers K, Tetrault J, Fiellin DA. The Association Between Marijuana Smoking and Lung Cancer. *Arch Intern Med*. 2006;166(13):1359. doi:10.1001/archinte.166.13.1359
356. Mehta S, McIntyre A, Janzen S, Loh E, Teasell R. Systematic Review of Pharmacologic Treatments of Pain After Spinal Cord Injury: An Update. *Arch Phys Med Rehabil*. 2016;97(8):1381-1391.e1. doi:10.1016/j.apmr.2015.12.023
357. Milano W, Capasso A. Cannabinoids Involvement in Neurodegenerative Diseases. *Res J Pharmacol*. 2019;13(2):16-26. doi:10.36478/rjpharm.2019.16.26
358. MINOZZI S, DAVOLI M, BARGAGLI AM, AMATO L, VECCHI S, PERUCCI CA. An overview of systematic reviews on cannabis and psychosis: Discussing apparently conflicting results. *Drug Alcohol Rev*. 2009;29(3):304-317. doi:10.1111/j.1465-3362.2009.00132.x
359. Moore THM, Zammit S, Lingford-Hughes A, et al. Cannabis use and risk of psychotic or affective mental health outcomes: a systematic review. *Lancet*. 2007;370(9584):319-328. doi:https://doi.org/10.1016/S0140-6736(07)61162-3
360. More SV, Choi D-K. Promising cannabinoid-based therapies for Parkinson's disease: motor symptoms to neuroprotection. *Mol Neurodegener*. 2015;10(1):17. doi:10.1186/s13024-015-0012-0
361. Morena M, Campolongo P. The endocannabinoid system: An emotional buffer in the modulation of memory function. *Neurobiol Learn Mem*. 2014;112:30-43. doi:10.1016/j.nlm.2013.12.010

362. Moulin D, Boulanger A, Clark A, et al. Pharmacological Management of Chronic Neuropathic Pain: Revised Consensus Statement from the Canadian Pain Society. *Pain Res Manag.* 2014;19(6):328-335. doi:10.1155/2014/754693
363. Mu A, Weinberg E, Moulin DE, Clarke H. Pharmacologic management of chronic neuropathic pain: Review of the Canadian Pain Society consensus statement. *Can Fam Physician.* 2017;63(11):844-852. doi:29138154
364. Mücke M, Carter C, Cuhls H, Prüb M, Radbruch L, Häuser W. Cannabinoide in der palliativen Versorgung. *Der Schmerz.* 2016;30(1):25-36. doi:10.1007/s00482-015-0085-2
365. Mücke M, Weier M, Carter C, et al. Systematic review and meta-analysis of cannabinoids in palliative medicine. *J Cachexia Sarcopenia Muscle.* 2018;9(2):220-234. doi:10.1002/jcsm.12273
366. Müller-Vahl KR. Treatment of Tourette syndrome with cannabinoids. *Behav Neurol.* 2013;27(1):119-124. doi:10.3233/BEN-120276
367. Murillo-Rodriguez E, Sarro-Ramirez A, Sanchez D, et al. Potential Effects of Cannabidiol as a Wake-Promoting Agent. *Curr Neuropharmacol.* 2014;12(3):269-272. doi:10.2174/1570159X11666131204235805
368. Myles H, Myles N, Large M. Cannabis use in first episode psychosis: Meta-analysis of prevalence, and the time course of initiation and continued use. *Aust New Zeal J Psychiatry.* 2016;50(3):208-219. doi:10.1177/0004867415599846
369. Nader DA, Sanchez ZM. Effects of regular cannabis use on neurocognition, brain structure, and function: a systematic review of findings in adults. *Am J Drug Alcohol Abuse.* 2018;44(1):4-18. doi:10.1080/00952990.2017.1306746
370. Navarri X, Afzali MH, Lavoie J, et al. How do substance use disorders compare to other psychiatric conditions on structural brain abnormalities? A cross-disorder meta-analytic comparison using the ENIGMA consortium findings. *Hum Brain Mapp.* 2022;43(1):399-413. doi:https://doi.org/10.1002/hbm.25114
371. Neale M. Efficacy and safety of cannabis for treating children with refractory epilepsy. *Nurs Child Young People.* 2017;29(7):32-37. doi:10.7748/ncyp.2017.e907
372. Neasta J, Barak S, Hamida S Ben, Ron D. mTOR complex 1: a key player in neuroadaptations induced by drugs of abuse. *J Neurochem.* 2014;130(2):172-184. doi:10.1111/jnc.12725
373. Ng L, Khan F, Young CA, Galea M. Symptomatic treatments for amyotrophic lateral sclerosis/motor neuron disease. *Cochrane Database Syst Rev.* Published online January 2017. doi:10.1002/14651858.CD011776.pub2
374. Niaz K, Khan F, Maqbool F, et al. Endo-cannabinoids system and the toxicity of cannabinoids with a biotechnological approach. *EXCLI J.* 2017;16:688-711. doi:10.17179/excli2017-257
375. Nielsen S, Sabioni P, Trigo JM, et al. Opioid-Sparing Effect of Cannabinoids: A Systematic Review and Meta-Analysis. *Neuropsychopharmacology.* 2017;42(9):1752-1765. doi:10.1038/npp.2017.51
376. Nielsen S, Germanos R, Weier M, et al. The Use of Cannabis and Cannabinoids in Treating Symptoms of Multiple Sclerosis: a Systematic Review of Reviews. *Curr Neurol Neurosci Rep.* 2018;18(2):8. doi:10.1007/s11910-018-0814-x



377. Niesink RJM, van Laar MW. Does Cannabidiol Protect Against Adverse Psychological Effects of THC? *Front Psychiatry*. 2013;4. doi:10.3389/fpsy.2013.00130
378. Norton C, Czuber-Dochan W, Artom M, Sweeney L, Hart A. Systematic review: interventions for abdominal pain management in inflammatory bowel disease. *Aliment Pharmacol Ther*. 2017;46(2):115-125. doi:10.1111/apt.14108
379. Nsuala BN, Enslin G, Viljoen A. "Wild cannabis": A review of the traditional use and phytochemistry of *Leonotis leonurus*. *J Ethnopharmacol*. 2015;174:520-539. doi:10.1016/j.jep.2015.08.013
380. Nucci C, Bari M, Spanò A, et al. Potential roles of (endo)cannabinoids in the treatment of glaucoma: from intraocular pressure control to neuroprotection. In: ; 2008:451-464. doi:10.1016/S0079-6123(08)01131-X
381. Nugent SM, Morasco BJ, O'Neil ME, et al. The Effects of Cannabis Among Adults With Chronic Pain and an Overview of General Harms. *Ann Intern Med*. 2017;167(5):319. doi:10.7326/M17-0155
382. Núñez A, Núñez C, Corsi O, Rada G. Are cannabinoids effective for HIV wasting syndrome? *Medwave*. 2017;17(09):e7107-e7107. doi:10.5867/medwave.2017.09.7107
383. O'Connell BK, Gloss D, Devinsky O. Cannabinoids in treatment-resistant epilepsy: A review. *Epilepsy Behav*. 2017;70:341-348. doi:10.1016/j.yebeh.2016.11.012
384. O'Neil ME, Nugent SM, Morasco BJ, et al. Benefits and Harms of Plant-Based Cannabis for Posttraumatic Stress Disorder. *Ann Intern Med*. 2017;167(5):332. doi:10.7326/M17-0477
385. O'Tuathaigh CMP, Gantois I, Waddington JL. Genetic dissection of the psychotomimetic effects of cannabinoid exposure. *Prog Neuro-Psychopharmacology Biol Psychiatry*. 2014;52:33-40. doi:10.1016/j.pnpbp.2013.11.002
386. Ojo O, Wang X-H, Ojo OO, Ibe J. The Effects of Substance Abuse on Blood Glucose Parameters in Patients with Diabetes: A Systematic Review and Meta-Analysis. *Int J Environ Res Public Health*. 2018;15(12). doi:10.3390/ijerph15122691
387. Onaivi ES. Cannabinoid Receptors in Brain. In: ; 2009:335-369. doi:10.1016/S0074-7742(09)88012-4
388. Orsolini L, Papanti D, Corkery J, et al. Is there a Teratogenicity Risk Associated with Cannabis and Synthetic Cannabimimetics' ('Spice') Intake? *CNS Neurol Disord - Drug Targets*. 2017;16(5). doi:10.2174/1871527316666170413101257
389. Osazuwa-Peters N, Adjei-Boakye E, Loux TM, Varvares MA, Schootman M. Insufficient Evidence to Support or Refute the Association between Head and Neck Cancer and Marijuana Use. *J Evid Based Dent Pract*. 2016;16(2):127-129. doi:10.1016/j.jebdp.2016.06.004
390. Osborne AL, Solowij N, Weston-Green K. A systematic review of the effect of cannabidiol on cognitive function: Relevance to schizophrenia. *Neurosci Biobehav Rev*. 2017;72:310-324. doi:10.1016/j.neubiorev.2016.11.012
391. Heather Oxentine, MD, East Carolina University (ECU)/ Brody School of Medicine; Emory University School of Medicine; Melissa Musec, MD, ECU/Brody School of Medicine; Toni Johnson, MD ES of M. American Academy of Addiction Psychiatry (AAP) 27th Annual Meeting and Symposium: December 08-11, 2016 Bonita Springs, FL. *Am J Addict*. 2017;26(3):232-293. doi:10.1111/ajad.12545

392. Pacheco-Colón I, Limia JM, Gonzalez R. Nonacute effects of cannabis use on motivation and reward sensitivity in humans: A systematic review. *Psychol Addict Behav.* 2018;32(5):497-507. doi:10.1037/adb0000380
393. Palleria C, Cozza G, Khengar R, Libri V, De Sarro G. Safety Profile of the Newest Antiepileptic Drugs: A Curated Literature Review. *Curr Pharm Des.* 2018;23(37):5606-5624. doi:10.2174/1381612823666170809115429
394. Pamplona FA, da Silva LR, Coan AC. Potential Clinical Benefits of CBD-Rich Cannabis Extracts Over Purified CBD in Treatment-Resistant Epilepsy: Observational Data Meta-analysis. *Front Neurol.* 2018;9:759. doi:10.3389/fneur.2018.00759
395. Panza F, Solfrizzi V, Seripa D, et al. Progresses in treating agitation: a major clinical challenge in Alzheimer's disease. *Expert Opin Pharmacother.* 2015;16(17):2581-2588. doi:10.1517/14656566.2015.1092520
396. Papanti D, Schifano F, Botteon G, et al. "Spiceophrenia": a systematic overview of "Spice"-related psychopathological issues and a case report. *Hum Psychopharmacol Clin Exp.* 2013;28(4):379-389. doi:10.1002/hup.2312
397. Papathanasopoulos P, Messinis L, Lyros E, Kastellakis A, Panagis G. Multiple Sclerosis, Cannabinoids, and Cognition. *J Neuropsychiatry Clin Neurosci.* 2008;20(1):36-51. doi:10.1176/jnp.2008.20.1.36
398. Parakh P, Basu D. Cannabis and psychosis: Have we found the missing links? *Asian J Psychiatr.* 2013;6(4):281-287. doi:10.1016/j.ajp.2013.03.012
399. Park B, McPartland JM, Glass M. Cannabis, cannabinoids and reproduction. *Prostaglandins, Leukot Essent Fat Acids.* 2004;70(2):189-197. doi:10.1016/j.plefa.2003.04.007
400. Parmar JR, Forrest BD, Freeman RA. Medical marijuana patient counseling points for health care professionals based on trends in the medical uses, efficacy, and adverse effects of cannabis-based pharmaceutical drugs. *Res Soc Adm Pharm.* 2016;12(4):638-654. doi:10.1016/j.sapharm.2015.09.002
401. Pattij T, Wiskerke J, Schoffelmeer ANM. Cannabinoid modulation of executive functions. *Eur J Pharmacol.* 2008;585(2-3):458-463. doi:10.1016/j.ejphar.2008.02.099
402. Peña J, Rada G. Are cannabinoids effective for epilepsy? *Medwave.* 2017;17(Suppl1):e6821-e6821. doi:10.5867/medwave.2017.6821
403. Peña J, Jiménez C, Schmidt J. Do cannabinoids play a role in the control of glaucoma? *Medwave.* 2018;18(01):e7144-e7144. doi:10.5867/medwave.2018.01.7144
404. Pertwee RG. Cannabinoids and Multiple Sclerosis. *Mol Neurobiol.* 2007;36(1):45-59. doi:10.1007/s12035-007-0005-2
405. Perucca E. Cannabinoids in the Treatment of Epilepsy: Hard Evidence at Last? *J Epilepsy Res.* 2017;7(2):61-76. doi:10.14581/jer.17012
406. Peters EN, Budney AJ, Carroll KM. Clinical correlates of co-occurring cannabis and tobacco use: a systematic review. *Addiction.* 2012;107(8):1404-1417. doi:10.1111/j.1360-0443.2012.03843.x

407. Phillips RS, Friend AJ, Gibson F, et al. Antiemetic medication for prevention and treatment of chemotherapy-induced nausea and vomiting in childhood. *Cochrane database Syst Rev*. 2016;2(2):CD007786. doi:10.1002/14651858.CD007786.pub3
408. Pidgeon C, Rickards H. The pathophysiology and pharmacological treatment of Huntington disease. *Behav Neurol*. 2013;26(4):245-253. doi:10.3233/BEN-2012-120267
409. Pisani S, McGoohan K, Velayudhan L, Bhattacharyya S. Safety and Tolerability of Natural and Synthetic Cannabinoids in Older Adults: A Systematic Review and Meta-Analysis of Open-Label Trials and Observational Studies. *Drugs Aging*. 2021;38(10):887-910. doi:10.1007/s40266-021-00882-2
410. Pisanti S, Malfitano AM, Grimaldi C, et al. Use of cannabinoid receptor agonists in cancer therapy as palliative and curative agents. *Best Pract Res Clin Endocrinol Metab*. 2009;23(1):117-131. doi:10.1016/j.beem.2009.02.001
411. Pisanti S, Malfitano AM, Ciaglia E, et al. Cannabidiol: State of the art and new challenges for therapeutic applications. *Pharmacol Ther*. 2017;175:133-150. doi:10.1016/j.pharmthera.2017.02.041
412. Porsteinsson AP, Antonsdottir IM. An update on the advancements in the treatment of agitation in Alzheimer's disease. *Expert Opin Pharmacother*. 2017;18(6):611-620. doi:10.1080/14656566.2017.1307340
413. Poupon L, Kerckhove N, Vein J, et al. Minimizing chemotherapy-induced peripheral neuropathy: preclinical and clinical development of new perspectives. *Expert Opin Drug Saf*. 2015;14(8):1269-1282. doi:10.1517/14740338.2015.1056777
414. Prud'homme M, Cata R, Jutras-Aswad D. Cannabidiol as an Intervention for Addictive Behaviors: A Systematic Review of the Evidence. *Subst Abus Res Treat*. 2015;9:SART.S25081. doi:10.4137/SART.S25081
415. Pushpa-Rajah JA, McLoughlin BC, Gillies D, et al. Cannabis and schizophrenia. *Schizophr Bull*. 2015;41(2):336-337. doi:10.1093/schbul/sbu168
416. Qin K, Zhang F, Chen T, et al. Shared gray matter alterations in individuals with diverse behavioral addictions: A voxel-wise meta-analysis. *J Behav Addict*. 2020;9(1):44-57. doi:10.1556/2006.2020.00006
417. Quickfall J, Crockford D. Brain Neuroimaging in Cannabis Use: A Review. *J Neuropsychiatry Clin Neurosci*. 2006;18(3):318-332. doi:10.1176/jnp.2006.18.3.318
418. Qureshi AR, Rana AQ, Malik SH, et al. Comprehensive Examination of Therapies for Pain in Parkinson's Disease: A Systematic Review and Meta-Analysis. *Neuroepidemiology*. 2018;51(3-4):190-206. doi:10.1159/000492221
419. Rabgay K, Waranuch N, Chaiyakunapruk N, Sawangjit R, Ingkaninan K, Dilokthornsakul P. The effects of cannabis, cannabinoids, and their administration routes on pain control efficacy and safety: A systematic review and network meta-analysis. *J Am Pharm Assoc*. 2020;60(1):225-234.e6. doi:10.1016/j.japh.2019.07.015
420. Rabinak CA, Phan KL. Cannabinoid modulation of fear extinction brain circuits: a novel target to advance anxiety treatment. *Curr Pharm Des*. 2014;20(13):2212-2217. doi:10.2174/13816128113199990437

421. Radhakrishnan R, Wilkinson ST, Dâ€™Souza DC. Gone to Pot – A Review of the Association between Cannabis and Psychosis. *Front Psychiatry*. 2014;5. doi:10.3389/fpsy.2014.00054
422. Ragazzi TCC, Shuhama R, Menezes PR, Del-Ben CM. Cannabis use as a risk factor for psychotic-like experiences: A systematic review of non-clinical populations evaluated with the Community Assessment of Psychic Experiences. *Early Interv Psychiatry*. 2018;12(6):1013-1023. doi:10.1111/eip.12693
423. Ragen BJ, Seidel J, Chollak C, Pietrzak RH, Neumeister A. Investigational drugs under development for the treatment of PTSD. *Expert Opin Investig Drugs*. 2015;24(5):659-672. doi:10.1517/13543784.2015.1020109
424. Rai A, Meng H, Weinrib A, et al. A Review of Adjunctive CNS Medications Used for the Treatment of Post-Surgical Pain. *CNS Drugs*. 2017;31(7):605-615. doi:10.1007/s40263-017-0440-1
425. Rai HS, Winder GS. Marijuana Use and Organ Transplantation: a Review and Implications for Clinical Practice. *Curr Psychiatry Rep*. 2017;19(11):91. doi:10.1007/s11920-017-0843-1
426. Ramkellawan S, Bober S, Mindra S, Moreau J, Ko G. Medical cannabis – the Canadian perspective. *J Pain Res*. 2016;Volume 9:735-744. doi:10.2147/JPR.S98182
427. Ramo DE, Liu H, Prochaska JJ. Tobacco and marijuana use among adolescents and young adults: A systematic review of their co-use. *Clin Psychol Rev*. 2012;32(2):105-121. doi:10.1016/j.cpr.2011.12.002
428. Ramsay Wan C, Broussard B. Cannabis Use as a Determinant of Earlier Age at Onset of Schizophrenia and Related Psychotic Disorders. In: *The Complex Connection Between Cannabis and Schizophrenia*. Elsevier; 2018:247-269. doi:10.1016/B978-0-12-804791-0.00011-2
429. Ranganathan M, D’Souza DC. The acute effects of cannabinoids on memory in humans: a review. *Psychopharmacology (Berl)*. 2006;188(4):425-444. doi:10.1007/s00213-006-0508-y
430. Raphael B, Wooding S, Stevens G, Connor J. Comorbidity: cannabis and complexity. *J Psychiatr Pract*. 2005;11(3):161-176. doi:10.1097/00131746-200505000-00004
431. Ravi D, Ghasemiesfe M, Korenstein D, Cascino T, Keyhani S. Associations Between Marijuana Use and Cardiovascular Risk Factors and Outcomes. *Ann Intern Med*. 2018;168(3):187. doi:10.7326/M17-1548
432. Reece AS. Chronic toxicology of cannabis. *Clin Toxicol*. 2009;47(6):517-524. doi:10.1080/15563650903074507
433. Reisfield GM, Wasan AD, Jamison RN. The Prevalence and Significance of Cannabis Use in Patients Prescribed Chronic Opioid Therapy: A Review of the Extant Literature. *Pain Med*. 2009;10(8):1434-1441. doi:10.1111/j.1526-4637.2009.00726.x
434. Renard J, Krebs M-O, Le Pen G, Jay TM. Long-term consequences of adolescent cannabinoid exposure in adult psychopathology. *Front Neurosci*. 2014;8. doi:10.3389/fnins.2014.00361
435. Reuter SE, Martin JH. Pharmacokinetics of Cannabis in Cancer Cachexia-Anorexia Syndrome. *Clin Pharmacokinet*. 2016;55(7):807-812. doi:10.1007/s40262-015-0363-2
436. Ribeiro L, Ind P. Respiratory effects of cannabis smoking: A literature review. In: *6.1 Epidemiology*. European Respiratory Society; 2016:PA3105. doi:10.1183/13993003.congress-2016.PA3105

437. Ribeiro L, Ind P. S127 Effect of cannabis smoking on the development of bullous lung disease: a structured literature review. *Thorax*. 2016;71(Suppl 3):A74.2-A76. doi:10.1136/thoraxjnl-2016-209333.133
438. Richardson KA, Hester AK, McLemore GL. Prenatal cannabis exposure - The “first hit” to the endocannabinoid system. *Neurotoxicol Teratol*. 2016;58:5-14. doi:10.1016/j.ntt.2016.08.003
439. Rivera-Olmos VM, Parra-Bernal MC. [Cannabis: Effects in the Central Nervous System. Therapeutic, societal and legal consequences]. *Rev Med Inst Mex Seguro Soc*. 54(5):626-634.
440. Robson P. Therapeutic aspects of cannabis and cannabinoids. *Br J Psychiatry*. 2001;178(2):107-115. doi:10.1192/bjp.178.2.107
441. Rocco M, Rada G. Are the cannabinoids an effective treatment for fibromyalgia? *Medwave*. 2018;18(01):e7153-e7153. doi:10.5867/medwave.2018.01.7153
442. Rocha FCM, dos Santos Júnior JG, Stefano SC, da Silveira DX. Systematic review of the literature on clinical and experimental trials on the antitumor effects of cannabinoids in gliomas. *J Neurooncol*. 2014;116(1):11-24. doi:10.1007/s11060-013-1277-1
443. Rock EM, Sticht MA, Limebeer CL, Parker LA. Cannabinoid Regulation of Acute and Anticipatory Nausea. *Cannabis Cannabinoid Res*. 2016;1(1):113-121. doi:10.1089/can.2016.0006
444. Rodríguez A, Zavala C. Cannabinoids for the treatment of cannabis abuse disorder. *Medwave*. 2018;18(6):e7287. doi:10.5867/medwave.2018.06.7286
445. Rogeberg O, Elvik R, White M. Correction to: ‘The effects of cannabis intoxication on motor vehicle collision revisited and revised’ (2016). *Addiction*. 2018;113(5):967-969. doi:10.1111/add.14140
446. Rogeberg O. A meta-analysis of the crash risk of cannabis-positive drivers in culpability studies—Avoiding interpretational bias. *Accid Anal Prev*. 2019;123:69-78. doi:https://doi.org/10.1016/j.aap.2018.11.011
447. Rogers MJ, Rajanahally S, Brisbane WG, Ostrowski K, Lendvay TS, Walsh TJ. Relationship between cannabis and male reproductive health: a systematic review. *Fertil Steril*. 2017;108(3):e131-e132. doi:10.1016/j.fertnstert.2017.07.1176
448. Rohleder C, Müller JK, Lange B, Leweke FM. Cannabidiol as a Potential New Type of an Antipsychotic. A Critical Review of the Evidence. *Front Pharmacol*. 2016;7. doi:10.3389/fphar.2016.00422
449. Romero-Sandoval EA, Asbill S, Paige CA, Byrd-Glover K. Peripherally Restricted Cannabinoids for the Treatment of Pain. *Pharmacother J Hum Pharmacol Drug Ther*. 2015;35(10):917-925. doi:10.1002/phar.1642
450. Romero-Sandoval EA, Kolano AL, Alvarado-Vázquez PA. Cannabis and Cannabinoids for Chronic Pain. *Curr Rheumatol Rep*. 2017;19(11):67. doi:10.1007/s11926-017-0693-1
451. Rong C, Carmona NE, Lee YL, et al. Drug-drug interactions as a result of co-administering  $\Delta 9$ -THC and CBD with other psychotropic agents. *Expert Opin Drug Saf*. 2018;17(1):51-54. doi:10.1080/14740338.2017.1397128
452. Rosenberg EC, Tsien RW, Whalley BJ, Devinsky O. Cannabinoids and Epilepsy. *Neurotherapeutics*. 2015;12(4):747-768. doi:10.1007/s13311-015-0375-5

453. Rothbart R, Stein DJ. Pharmacotherapy of trichotillomania (hair pulling disorder): an updated systematic review. *Expert Opin Pharmacother*. 2014;15(18):2709-2719. doi:10.1517/14656566.2014.972936
454. Rothman EF, Johnson RM, Pettoruto K, Lavalley M. Does marijuana increase risk for dating violence victimization or perpetration? Results of a meta-analysis. *Drug Alcohol Depend*. 2015;146:e84. doi:10.1016/j.drugalcdep.2014.09.597
455. Rubino T, Parolaro D. Sex-Dependent Vulnerability to Cannabis Abuse in Adolescence. *Front Psychiatry*. 2015;6. doi:10.3389/fpsy.2015.00056
456. Ruisch IH, Dietrich A, Glennon JC, Buitelaar JK, Hoekstra PJ. Maternal substance use during pregnancy and offspring conduct problems: A meta-analysis. *Neurosci Biobehav Rev*. 2018;84:325-336. doi:10.1016/j.neubiorev.2017.08.014
457. Russell C, Rueda S, Room R, Tyndall M, Fischer B. Routes of administration for cannabis use – basic prevalence and related health outcomes: A scoping review and synthesis. *Int J Drug Policy*. 2018;52:87-96. doi:10.1016/j.drugpo.2017.11.008
458. Sami MB, Rabiner EA, Bhattacharyya S. Does cannabis affect dopaminergic signaling in the human brain? A systematic review of evidence to date. *Eur Neuropsychopharmacol*. 2015;25(8):1201-1224. doi:10.1016/j.euroneuro.2015.03.011
459. Santana TA, Truffelli DC, de Matos LL, Cruz FM, Del Giglio A. Meta-analysis of adjunctive non-NK1 receptor antagonist medications for the control of acute and delayed chemotherapy-induced nausea and vomiting. *Support Care Cancer*. 2015;23(1):213-222. doi:10.1007/s00520-014-2392-z
460. Sarfaraz S, Adhami VM, Syed DN, Afaq F, Mukhtar H. Cannabinoids for Cancer Treatment: Progress and Promise: Figure 1. *Cancer Res*. 2008;68(2):339-342. doi:10.1158/0008-5472.CAN-07-2785
461. Sarne Y, Mechoulam R. Cannabinoids: Between Neuroprotection and Neurotoxicity. *Curr Drug Target -CNS Neurol Disord*. 2005;4(6):677-684. doi:10.2174/156800705774933005
462. Schneider M. Puberty as a highly vulnerable developmental period for the consequences of cannabis exposure. *Addict Biol*. 2008;13(2):253-263. doi:10.1111/j.1369-1600.2008.00110.x
463. Schreck B, Wagneur N, Caillet P, et al. Cannabinoid hyperemesis syndrome: Review of the literature and of cases reported to the French addictovigilance network. *Drug Alcohol Depend*. 2018;182:27-32. doi:10.1016/j.drugalcdep.2017.09.038
464. Schubart CD, Sommer IEC, Fusar-Poli P, de Witte L, Kahn RS, Boks MPM. Cannabidiol as a potential treatment for psychosis. *Eur Neuropsychopharmacol*. 2014;24(1):51-64. doi:10.1016/j.euroneuro.2013.11.002
465. Schussel V, Kenzo L, Santos A, et al. Cannabinoids for nausea and vomiting related to chemotherapy: Overview of systematic reviews. *Phyther Res*. 2018;32(4):567-576. doi:10.1002/ptr.5975
466. Schussel V, Kenzo L, Santos A, et al. Cannabinoids for nausea and vomiting related to chemotherapy: Overview of systematic reviews. *Phytother Res*. 2018;32(4):567-576. doi:10.1002/ptr.5975

467. SCHWARTZ RH, VOTH EA, SHERIDAN MJ. Marijuana to Prevent Nausea and Vomiting in Cancer Patients: A Survey of Clinical Oncologists. *South Med J*. 1997;90(2):167-172. doi:10.1097/00007611-199702000-00001
468. Scott JC, Slomiak ST, Jones JD, Rosen AFG, Moore TM, Gur RC. Association of Cannabis With Cognitive Functioning in Adolescents and Young Adults. *JAMA Psychiatry*. 2018;75(6):585. doi:10.1001/jamapsychiatry.2018.0335
469. Sellers J, Nunes V. A Synthetic Cannabinoid Use in Pregnancy: A Brief Educational Intervention for Obstetric Providers and Patients [19]. *Obstet Gynecol*. 2017;129(1):97S-98S. doi:10.1097/01.AOG.0000514958.58005.54
470. Semple DM, McIntosh AM, Lawrie SM. Cannabis as a risk factor for psychosis: systematic review. *J Psychopharmacol*. 2005;19(2):187-194. doi:10.1177/0269881105049040
471. Serafini G, Pompili M, Innamorati M, Rihmer Z, Sher L, Girardi P. Can Cannabis Increase the Suicide Risk in Psychosis? A Critical Review. *Curr Pharm Des*. 2012;18(32):5165-5187. doi:10.2174/138161212802884663
472. Shahpiri Z, Bahramsoltani R, Hosein Farzaei M, Farzaei F, Rahimi R. Phytochemicals as future drugs for Parkinson's disease: a comprehensive review. *Rev Neurosci*. 2016;27(6):651-668. doi:10.1515/revneuro-2016-0004
473. Sharapova SR, Phillips E, Sirocco K, Kaminski JW, Leeb RT, Rolle I. Effects of prenatal marijuana exposure on neuropsychological outcomes in children aged 1-11 years: A systematic review. *Paediatr Perinat Epidemiol*. 2018;32(6):512-532. doi:10.1111/ppe.12505
474. Sharma MK, Murumkar PR, Barmade MA, Giridhar R, Yadav MR. A comprehensive patents review on cannabinoid 1 receptor antagonists as antiobesity agents. *Expert Opin Ther Pat*. 2015;25(10):1093-1116. doi:10.1517/13543776.2015.1064898
475. Shorter D, Hsieh J, Kosten TR. Pharmacologic management of comorbid post-traumatic stress disorder and addictions. *Am J Addict*. 2015;24(8):705-712. doi:10.1111/ajad.12306
476. Shrivastava A, Johnston M, Terpstra K, Bureau Y. Pathways to Psychosis in Cannabis Abuse. *Clin Schizophr Relat Psychoses*. 2015;9(1):30-35. doi:10.3371/CSRP.SHJO.030813
477. Silva TBG, Balbino CQ, Weiber AFM. The relationship between cannabidiol and psychosis: A review. *Ann Clin Psychiatry*. 2015;27(2):134-141.
478. Silveira MM, Arnold JC, Laviolette SR, et al. Seeing through the smoke: Human and animal studies of cannabis use and endocannabinoid signalling in corticolimbic networks. *Neurosci Biobehav Rev*. 2017;76:380-395. doi:10.1016/j.neubiorev.2016.09.007
479. Roberto Simons-Linares C, Barkin JA, Jaiswal P, et al. The Effect of Cannabis Consumption on the Development and Severity of Acute Pancreatitis. *Gastroenterology*. 2017;152(5):S293. doi:10.1016/S0016-5085(17)31267-2
480. Sims ED, Anvari S, Lee Y, et al. The effect of cannabis exposure on pubertal outcomes: a systematic review. *Adolesc Health Med Ther*. 2018;9:137-147. doi:10.2147/AHMT.S175864
481. Skalski LM, Towe SL, Sikkema KJ, Meade CS. The Impact of Marijuana Use on Memory in HIV-Infected Patients: A Comprehensive Review of the HIV and Marijuana Literatures. *Curr Drug Abuse Rev*. 2017;9(2):126-141. doi:10.2174/1874473709666160502124503

482. Snedecor S, Sudharshan L, Cappelleri, et al. Systematic review and comparison of pharmacologic therapies for neuropathic pain associated with spinal cord injury. *J Pain Res*. Published online July 2013;539. doi:10.2147/JPR.S45966
483. Snedecor SJ, Sudharshan L, Cappelleri JC, Sadosky A, Mehta S, Botteman M. Systematic Review and Meta-Analysis of Pharmacological Therapies for Painful Diabetic Peripheral Neuropathy. *Pain Pract*. 2014;14(2):167-184. doi:10.1111/papr.12054
484. P. Soares V, C. Campos A. Evidences for the Anti-panic Actions of Cannabidiol. *Curr Neuropharmacol*. 2017;15(2):291-299. doi:10.2174/1570159X14666160509123955
485. Soler R, Andersson K-E, Chancellor MB, et al. Future Direction in Pharmacotherapy for Non-neurogenic Male Lower Urinary Tract Symptoms. *Eur Urol*. 2013;64(4):610-621. doi:10.1016/j.eururo.2013.04.042
486. Soliman N, Haroutounian S, Hohmann AG, et al. Systematic review and meta-analysis of cannabinoids, cannabis-based medicines, and endocannabinoid system modulators tested for antinociceptive effects in animal models of injury-related or pathological persistent pain. *Pain*. 2021;162(Suppl 1):S26-S44. doi:10.1097/j.pain.0000000000002269
487. Solowij N, Battisti R. The Chronic Effects of Cannabis on Memory in Humans: A Review. *Curr Drug Abuse Rev*. 2008;1(1):81-98. doi:10.2174/1874473710801010081
488. Stanley C, O'Sullivan SE. Vascular targets for cannabinoids: animal and human studies. *Br J Pharmacol*. 2014;171(6):1361-1378. doi:10.1111/bph.12560
489. Steenkamp MM, Blessing EM, Galatzer-Levy IR, Hollahan LC, Anderson WT. Marijuana and other cannabinoids as a treatment for posttraumatic stress disorder: A literature review. *Depress Anxiety*. 2017;34(3):207-216. doi:10.1002/da.22596
490. Stern CAJ, de Carvalho CR, Bertoglio LJ, Takahashi RN. Effects of Cannabinoid Drugs on Aversive or Rewarding Drug-Associated Memory Extinction and Reconsolidation. *Neuroscience*. 2018;370:62-80. doi:10.1016/j.neuroscience.2017.07.018
491. Stevens AJ, Higgins MD. A systematic review of the analgesic efficacy of cannabinoid medications in the management of acute pain. *Acta Anaesthesiol Scand*. 2017;61(3):268-280. doi:10.1111/aas.12851
492. Sticht MA, Rock EM, Limebeer CL, Parker LA. Endocannabinoid Mechanisms Influencing Nausea. In: ; 2015:127-162. doi:10.1016/bs.irn.2015.09.001
493. Stockings E, Zagic D, Campbell G, et al. Evidence for cannabis and cannabinoids for epilepsy: a systematic review of controlled and observational evidence. *J Neurol Neurosurg Psychiatry*. 2018;89(7):741-753. doi:10.1136/jnnp-2017-317168
494. Stout SM, Cimino NM. Exogenous cannabinoids as substrates, inhibitors, and inducers of human drug metabolizing enzymes: a systematic review. *Drug Metab Rev*. 2014;46(1):86-95. doi:10.3109/03602532.2013.849268
495. Suárez-Pinilla P, López-Gil J, Crespo-Facorro B. Immune system: A possible nexus between cannabinoids and psychosis. *Brain Behav Immun*. 2014;40:269-282. doi:10.1016/j.bbi.2014.01.018
496. Sznitman SR, Zolotov Y. Cannabis for Therapeutic Purposes and public health and safety: A systematic and critical review. *Int J Drug Policy*. 2015;26(1):20-29. doi:10.1016/j.drugpo.2014.09.005



497. Tafelski S, Häuser W, Schäfer M. Efficacy, tolerability, and safety of cannabinoids for chemotherapy-induced nausea and vomiting—a systematic review of systematic reviews. *Der Schmerz*. 2016;30(1):14-24. doi:10.1007/s00482-015-0092-3
498. Tahamtan A, Tavakoli-Yaraki M, Rygiel TP, Mokhtari-Azad T, Salimi V. Effects of cannabinoids and their receptors on viral infections. *J Med Virol*. 2016;88(1):1-12. doi:10.1002/jmv.24292
499. Tait RJ, Caldicott D, Mountain D, Hill SL, Lenton S. A systematic review of adverse events arising from the use of synthetic cannabinoids and their associated treatment. *Clin Toxicol*. 2016;54(1):1-13. doi:10.3109/15563650.2015.1110590
500. Talamo A, Centorrino F, Tondo L, Dimitri A, Hennen J, Baldessarini RJ. Comorbid substance-use in schizophrenia: Relation to positive and negative symptoms. *Schizophr Res*. 2006;86(1-3):251-255. doi:10.1016/j.schres.2006.04.004
501. Tandon C, Mathur P. Antimicrobial Efficacy of Cannabis sativa L. (Bhang): A Comprehensive Review. *Int J Pharm Sci Rev Res*. 2017;44(26):94-100.
502. Tateo S. State of the evidence. *J Am Assoc Nurse Pract*. 2017;29(2):94-103. doi:10.1002/2327-6924.12422
503. Termine C, Selvini C, Rossi G, Balottin U. Emerging Treatment Strategies in Tourette Syndrome. In: ; 2013:445-480. doi:10.1016/B978-0-12-411546-0.00015-9
504. Tetrault JM. Effects of Marijuana Smoking on Pulmonary Function and Respiratory Complications. *Arch Intern Med*. 2007;167(3):221. doi:10.1001/archinte.167.3.221
505. Thornicroft G. Cannabis and Psychosis. *Br J Psychiatry*. 1990;157(1):25-33. doi:10.1192/bjp.157.1.25
506. Tomassini A, Roncone R, Verni L, et al. Uso di cannabis ed esordi psicotici: Dall'epidemiologia alla clinica. *J Psychopathol*. 2013;19(2):89-104.
507. Tournebize J, Gibaja V, Kahn JP. Undesirable Effects of New Psychoactive Substances: Review of the Available Literature. *Eur Psychiatry*. 2015;30:480. doi:10.1016/S0924-9338(15)30378-3
508. Tournebize J, Gibaja V, Kahn J-P. Acute effects of synthetic cannabinoids: Update 2015. *Subst Abus*. 2017;38(3):344-366. doi:10.1080/08897077.2016.1219438
509. Trescot AM, Boswell M V, Atluri SL, et al. Opioid guidelines in the management of chronic non-cancer pain. *Pain Physician*. 2006;9(1):1-39.
510. Trinh K V., Diep D, Robson H. Marijuana and Its Effects on Athletic Performance: A Systematic Review. *Clin J Sport Med*. 2018;28(4):350-357. doi:10.1097/JSM.0000000000000471
511. Trojano M. Advances in the management of MS symptoms: real-life evidence. *Neurodegener Dis Manag*. 2015;5(6s):19-21. doi:10.2217/nmt.15.66
512. Tsang CC, Giudice MG. Nabilone for the Management of Pain. *Pharmacother J Hum Pharmacol Drug Ther*. 2016;36(3):273-286. doi:10.1002/phar.1709
513. Tuca A, Jimenez-Fonseca P, Gascón P. Clinical evaluation and optimal management of cancer cachexia. *Crit Rev Oncol Hematol*. 2013;88(3):625-636. doi:10.1016/j.critrevonc.2013.07.015
514. Turcotte C, Blanchet M-R, Laviolette M, Flamand N. Impact of Cannabis, Cannabinoids, and Endocannabinoids in the Lungs. *Front Pharmacol*. 2016;7. doi:10.3389/fphar.2016.00317

515. Turgeman I, Bar-Sela G. Cannabis Use in Palliative Oncology: A Review of the Evidence for Popular Indications. *Isr Med Assoc J*. 2017;19(2):85-88. doi:28457056
516. Turna J, Patterson B, Van Ameringen M. Is cannabis treatment for anxiety, mood, and related disorders ready for prime time? *Depress Anxiety*. 2017;34(11):1006-1017. doi:10.1002/da.22664
517. Turna J, Syan SK, Frey BN, et al. Cannabidiol as a Novel Candidate Alcohol Use Disorder Pharmacotherapy: A Systematic Review. *Alcohol Clin Exp Res*. 2019;43(4):550-563. doi:10.1111/acer.13964
518. Turner SD, Spithoff S, Kahan M. Approach to cannabis use disorder in primary care: focus on youth and other high-risk users. *Can Fam Physician*. 2014;60(9):801-808, e423-32.
519. Twomey CD. Association of cannabis use with the development of elevated anxiety symptoms in the general population: a meta-analysis. *J Epidemiol Community Health*. 2017;71(8):811-816. doi:10.1136/jech-2016-208145
520. Urbi B, Owusu MA, Hughes I, Katz M, Broadley S, Sabet A. Effects of cannabinoids in Amyotrophic Lateral Sclerosis (ALS) murine models: a systematic review and meta-analysis. *J Neurochem*. 2019;149(2):284-297. doi:10.1111/jnc.14639
521. van den Beuken-van Everdingen MHJ, de Graeff A, Jongen JLM, Dijkstra D, Mostovaya I, Vissers KC. Pharmacological Treatment of Pain in Cancer Patients: The Role of Adjuvant Analgesics, a Systematic Review. *Pain Pract*. 2017;17(3):409-419. doi:10.1111/papr.12459
522. van den Elsen GAH, Ahmed AIA, Lammers M, et al. Efficacy and safety of medical cannabinoids in older subjects: A systematic review. *Ageing Res Rev*. 2014;14:56-64. doi:10.1016/j.arr.2014.01.007
523. van der Meer FJ, Velthorst E, Meijer CJ, Machielsen MWJ, de Haan L. Cannabis use in patients at clinical high risk of psychosis: impact on prodromal symptoms and transition to psychosis. *Curr Pharm Des*. 2012;18(32):5036-5044. doi:10.2174/138161212802884762
524. van Winkel R, Kuepper R. Epidemiological, Neurobiological, and Genetic Clues to the Mechanisms Linking Cannabis Use to Risk for Nonaffective Psychosis. *Annu Rev Clin Psychol*. 2014;10(1):767-791. doi:10.1146/annurev-clinpsy-032813-153631
525. VanderVeen JD, Hershberger AR, Cyders MA. UPPS-P model impulsivity and marijuana use behaviors in adolescents: A meta-analysis. *Drug Alcohol Depend*. 2016;168:181-190. doi:10.1016/j.drugalcdep.2016.09.016
526. Vassoler FM, Byrnes EM, Pierce RC. The impact of exposure to addictive drugs on future generations: Physiological and behavioral effects. *Neuropharmacology*. 2014;76:269-275. doi:10.1016/j.neuropharm.2013.06.016
527. Vaucher J, Keating BJ, Lasserre AM, et al. Cannabis use and risk of schizophrenia: A Mendelian randomization study. *Mol Psychiatry*. 2018;23(5):1287-1292. doi:10.1038/mp.2016.252
528. Velasco G, Sánchez C, Guzmán M. Endocannabinoids and Cancer. In: ; 2015:449-472. doi:10.1007/978-3-319-20825-1\_16
529. Velayudhan L, Diepen E, Marudkar M, et al. Therapeutic Potential of Cannabinoids in Neurodegenerative Disorders: A Selective Review. *Curr Pharm Des*. 2014;20(13):2218-2230. doi:10.2174/13816128113199990434

530. Verdejo-García A, Pérez-García M, Sánchez-Barrera M, Rodríguez-Fernández A, Gómez-Río M. [Neuroimaging and drug addiction: neuroanatomical correlates of cocaine, opiates, cannabis and ecstasy abuse]. *Rev Neurol*. 44(7):432-439.
531. Verdoux H, Tournier M. Cannabis use and risk of psychosis: an etiological link? *Epidemiol Psychiatr Soc*. 2004;13(2):113-119. doi:10.1017/S1121189X0000333X
532. Vermersch P. Advances in the management of MS symptoms: recently proposed clinical management algorithms. *Neurodegener Dis Manag*. 2015;5(6s):23-26. doi:10.2217/nmt.15.57
533. Verrotti A, Castagnino M, Maccarrone M, Fezza F. Plant-Derived and Endogenous Cannabinoids in Epilepsy. *Clin Drug Investig*. 2016;36(5):331-340. doi:10.1007/s40261-016-0379-x
534. Versteeg P, Slot D, van der Velden U, van der Weijden G. Effect of cannabis usage on the oral environment: a review. *Int J Dent Hyg*. 2008;6(4):315-320. doi:10.1111/j.1601-5037.2008.00301.x
535. Verweij KJH, Zietsch BP, Lynskey MT, et al. Genetic and environmental influences on cannabis use initiation and problematic use: a meta-analysis of twin studies. *Addiction*. 2010;105(3):417-430. doi:10.1111/j.1360-0443.2009.02831.x
536. Behavior Genetics Association 41st Annual Meeting Abstracts. *Behav Genet*. 2011;41(6):890-944. doi:10.1007/s10519-011-9495-9
537. Vilain J, Galliot A-M, Durand-Roger J, et al. Les facteurs de risque environnementaux de la schizophrénie. *Encephale*. 2013;39(1):19-28. doi:10.1016/j.encep.2011.12.007
538. Viteri O, Soto E, Bahado-Singh R, Christensen C, Chauhan S, Sibai B. Fetal Anomalies and Long-Term Effects Associated with Substance Abuse in Pregnancy: A Literature Review. *Am J Perinatol*. 2014;32(05):405-416. doi:10.1055/s-0034-1393932
539. Volkow ND, Swanson JM, Evins AE, et al. Effects of Cannabis Use on Human Behavior, Including Cognition, Motivation, and Psychosis: A Review. *JAMA Psychiatry*. 2016;73(3):292. doi:10.1001/jamapsychiatry.2015.3278
540. Voth EA. Medicinal Applications of Delta-9-Tetrahydrocannabinol and Marijuana. *Ann Intern Med*. 1997;126(10):791. doi:10.7326/0003-4819-126-10-199705150-00008
541. Vyas MB, LeBaron VT, Gilson AM. The use of cannabis in response to the opioid crisis: A review of the literature. *Nurs Outlook*. 2018;66(1):56-65. doi:10.1016/j.outlook.2017.08.012
542. Wade DT, Collin C, Stott C, Duncombe P. Meta-analysis of the efficacy and safety of Sativex (nabiximols), on spasticity in people with multiple sclerosis. *Mult Scler J*. 2010;16(6):707-714. doi:10.1177/1352458510367462
543. Walitt B, Klose P, Fitzcharles M-A, Phillips T, Häuser W. Cannabinoids for fibromyalgia. *Cochrane Database Syst Rev*. Published online July 2016. doi:10.1002/14651858.CD011694.pub2
544. Walker JM, Hohmann AG. Cannabinoid Mechanisms of Pain Suppression. In: *Cannabinoids*. Springer-Verlag; 2005:509-554. doi:10.1007/3-540-26573-2\_17
545. Walsh Z, Gonzalez R, Crosby K, S. Thiessen M, Carroll C, Bonn-Miller MO. Medical cannabis and mental health: A guided systematic review. *Clin Psychol Rev*. 2017;51:15-29. doi:10.1016/j.cpr.2016.10.002

546. Walter L, Stella N. Cannabinoids and neuroinflammation. *Br J Pharmacol*. 2004;141(5):775-785. doi:10.1038/sj.bjp.0705667
547. Watson SJ. Marijuana and Medicine: Assessing the Science Base: A Summary of the 1999 Institute of Medicine Report. *Arch Gen Psychiatry*. 2000;57(6):547-552. doi:10.1001/archpsyc.57.6.547
548. Weier M, Hall W. The Use of Cannabinoids in Treating Dementia. *Curr Neurol Neurosci Rep*. 2017;17(8):56. doi:10.1007/s11910-017-0766-6
549. Weinstein A, Livny A, Weizman A. Brain Imaging Studies on the Cognitive, Pharmacological and Neurobiological Effects of Cannabis in Humans: Evidence from Studies of Adult Users. *Curr Pharm Des*. 2017;22(42):6366-6379. doi:10.2174/1381612822666160822151323
550. Weiss SRB, Blanco C, Wargo EM. Clarifying the link between cannabis use and risk for psychosis. *Acta Psychiatr Scand*. 2017;136(1):3-4. doi:10.1111/acps.12764
551. Welsh JW, Knight JR, Hou SS-Y, et al. Association Between Substance Use Diagnoses and Psychiatric Disorders in an Adolescent and Young Adult Clinic-Based Population. *J Adolesc Heal*. 2017;60(6):648-652. doi:10.1016/j.jadohealth.2016.12.018
552. Werneck MA, Kortas GT, de Andrade AG, Castaldelli-Maia JM. A Systematic Review of the Efficacy of Cannabinoid Agonist Replacement Therapy for Cannabis Withdrawal Symptoms. *CNS Drugs*. 2018;32(12):1113-1129. doi:10.1007/s40263-018-0577-6
553. Wijayendran SB, O'Neill A, Bhattacharyya S. The effects of cannabis use on salience attribution: a systematic review. *Acta Neuropsychiatr*. 2018;30(1):43-57. doi:10.1017/neu.2016.58
554. Wilkinson ST, Radhakrishnan R, D'Souza DC. A Systematic Review of the Evidence for Medical Marijuana in Psychiatric Indications. *J Clin Psychiatry*. 2016;77(08):1050-1064. doi:10.4088/JCP.15r10036
555. Wisdom JP, Manuel JI, Drake RE. Substance Use Disorder Among People With First-Episode Psychosis: A Systematic Review of Course and Treatment. *Psychiatr Serv*. 2011;62(9):1007-1012. doi:10.1176/ps.62.9.pss6209\_1007
556. Witkin JM, Tzavara ET, Nomikos GG. A role for cannabinoid CB1 receptors in mood and anxiety disorders. *Behav Pharmacol*. 2005;16(5-6):315-331. doi:10.1097/00008877-200509000-00005
557. Wolff V, Jouanjus E. Strokes are possible complications of cannabinoids use. *Epilepsy Behav*. 2017;70:355-363. doi:10.1016/j.yebeh.2017.01.031
558. Wong SS, Wilens TE. Medical Cannabinoids in Children and Adolescents: A Systematic Review. *Pediatrics*. 2017;140(5). doi:10.1542/peds.2017-1818
559. Wrege J, Schmidt A, Walter A, et al. Effects of Cannabis on Impulsivity: A Systematic Review of Neuroimaging Findings. *Curr Pharm Des*. 2014;20(13):2126-2137. doi:10.2174/13816128113199990428
560. Wright S. Cannabinoid-Based Medicines for Neurological Disorders—Clinical Evidence. *Mol Neurobiol*. 2007;36(1):129-136. doi:10.1007/s12035-007-0003-4
561. Yadav V, Bever C, Bowen J, et al. Summary of evidence-based guideline: Complementary and alternative medicine in multiple sclerosis: Report of the Guideline Development Subcommittee of the

American Academy of Neurology. *Neurology*. 2014;82(12):1083-1092.  
doi:10.1212/WNL.0000000000000250

562. Yadav V, Narayanaswami P. Complementary and Alternative Medical Therapies in Multiple Sclerosis—The American Academy of Neurology Guidelines: A Commentary. *Clin Ther*. 2014;36(12):1972-1978. doi:10.1016/j.clinthera.2014.10.011

563. Yalcin S, Esin E. Neuropathic cancer pain: What we are dealing with? How to manage it? *Onco Targets Ther*. Published online April 2014:599. doi:10.2147/OTT.S60995

564. Yanes JA, Riedel MC, Ray KL, et al. Neuroimaging meta-analysis of cannabis use studies reveals convergent functional alterations in brain regions supporting cognitive control and reward processing. *J Psychopharmacol*. 2018;32(3):283-295. doi:10.1177/0269881117744995

565. Yap M, Easterbrook L, Connors J, Koopmans L. Use of cannabis in severe childhood epilepsy and child protection considerations. *J Paediatr Child Health*. 2015;51(5):491-496.  
doi:10.1111/jpc.12876

566. Yarnell S. The Use of Medicinal Marijuana for Posttraumatic Stress Disorder. *Prim Care Companion CNS Disord*. Published online May 2015. doi:10.4088/PCC.15r01786

567. Abo Youssef N, Schneider MP, Mordasini L, et al. Cannabinoids for treating neurogenic lower urinary tract dysfunction in patients with multiple sclerosis: a systematic review and meta-analysis. *BJU Int*. 2017;119(4):515-521. doi:10.1111/bju.13759

568. Yucel M, Bora E, Lubman DI, et al. The Impact of Cannabis Use on Cognitive Functioning in Patients With Schizophrenia: A Meta-analysis of Existing Findings and New Data in a First-Episode Sample. *Schizophr Bull*. 2012;38(2):316-330. doi:10.1093/schbul/sbq079

569. Yurcheshen M, Seehuus M, Pigeon W. Updates on Nutraceutical Sleep Therapeutics and Investigational Research. *Evidence-Based Complement Altern Med*. 2015;2015:1-9.  
doi:10.1155/2015/105256

570. Zammit S, Moore THM, Lingford-Hughes A, et al. Effects of cannabis use on outcomes of psychotic disorders: systematic review. *Br J Psychiatry*. 2008;193(5):357-363.  
doi:10.1192/bjp.bp.107.046375

571. Zarifi C. Spice-y Kidney Failure: A Case Report and Systematic Review of Acute Kidney Injury Attributable to the Use of Synthetic Cannabis. *Perm J*. Published online 2017. doi:10.7812/TPP/16-160

572. Zettl UK, Rommer P, Hipp P, Patejdl R. Evidence for the efficacy and effectiveness of THC-CBD oromucosal spray in symptom management of patients with spasticity due to multiple sclerosis. *Ther Adv Neurol Disord*. 2016;9(1):9-30. doi:10.1177/1756285615612659

573. Zhang MW, Ho RCM. The Cannabis Dilemma: A Review of Its Associated Risks and Clinical Efficacy. *J Addict*. 2015;2015:1-6. doi:10.1155/2015/707596

574. Zhang MWB, Ying J, Wing T, Song G, Fung DSS, Smith HE. Cognitive Biases in Cannabis, Opioid, and Stimulant Disorders: A Systematic Review. *Front Psychiatry*. 2018;9.  
doi:10.3389/fpsy.2018.00376

575. Zhang M, Ying J, Wing T, Song G, Fung DSS, Smith H. A Systematic Review of Attention Biases in Opioid, Cannabis, Stimulant Use Disorders. *Int J Environ Res Public Health*. 2018;15(6). doi:10.3390/ijerph15061138
576. Zilverstand A, Huang AS, Alia-Klein N, Goldstein RZ. Neuroimaging Impaired Response Inhibition and Salience Attribution in Human Drug Addiction: A Systematic Review. *Neuron*. 2018;98(5):886-903. doi:10.1016/j.neuron.2018.03.048
577. Zlebnik NE, Cheer JF. Beyond the CB1 Receptor: Is Cannabidiol the Answer for Disorders of Motivation? *Annu Rev Neurosci*. 2016;39(1):1-17. doi:10.1146/annurev-neuro-070815-014038
578. Zuardi AW. Cannabidiol: from an inactive cannabinoid to a drug with wide spectrum of action. *Rev Bras Psiquiatr*. 2008;30(3):271-280. doi:10.1590/S1516-44462008000300015
579. Alayash Z, Nolde M, Meisinger C, Baurecht H, Baumeister S-E. Cannabis use and obesity-traits: A Mendelian randomization study. *Drug Alcohol Depend*. 2021;226:108863. doi:10.1016/j.drugalcdep.2021.108863
580. Baumeister S-E, Nolde M, Alayash Z, Leitzmann M, Baurecht H, Meisinger C. Cannabis use does not impact on type 2 diabetes: A two-sample Mendelian randomization study. *Addict Biol*. 2021;26(6):e13020. doi:https://doi.org/10.1111/adb.13020
581. Jepsen OH, Speed M, Speed D, Østergaard SD. Bipolar disorder and cannabis use: A bidirectional two-sample Mendelian randomization study. *Addict Biol*. 2021;26(6):e13030. doi:https://doi.org/10.1111/adb.13030
582. Johnson EC, Hatoum AS, Deak JD, et al. The relationship between cannabis and schizophrenia: a genetically informed perspective. *Addiction*. 2021;116(11):3227-3234. doi:https://doi.org/10.1111/add.15534
583. Gage SH, Jones HJ, Burgess S, et al. Assessing causality in associations between cannabis use and schizophrenia risk: A two-sample Mendelian randomization study. *Psychol Med*. 2017;47(5):971-980. doi:10.1017/S0033291716003172
584. Mahedy L, Wootton R, Suddell S, et al. Testing the association between tobacco and cannabis use and cognitive functioning: Findings from an observational and Mendelian randomization study. *Drug Alcohol Depend*. 2021;221:108591. doi:10.1016/j.drugalcdep.2021.108591
585. Soler Artigas M, Sánchez-Mora C, Rovira P, et al. Attention-deficit/hyperactivity disorder and lifetime cannabis use: genetic overlap and causality. *Mol Psychiatry*. 2020;25(10):2493-2503. doi:10.1038/s41380-018-0339-3
586. Orri M, Séguin JR, Castellanos-Ryan N, et al. A genetically informed study on the association of cannabis, alcohol, and tobacco smoking with suicide attempt. *Mol Psychiatry*. 2021;26(9):5061-5070. doi:10.1038/s41380-020-0785-6
587. Verweij KJH, Treur JL, Vink JM. Investigating causal associations between use of nicotine, alcohol, caffeine and cannabis: a two-sample bidirectional Mendelian randomization study. *Addiction*. 2018;113(7):1333-1338. doi:10.1111/add.14154
588. Zhao J, Chen H, Zhuo C, Xia S. Cannabis Use and the Risk of Cardiovascular Diseases: A Mendelian Randomization Study. *Front Cardiovasc Med*. 2021;8:676850. doi:10.3389/fcvm.2021.676850
