# Supplementary material for: Balancing risks and benefits of cannabis use: umbrella review of meta-analyses of randomised controlled trials and observational studies
Source: PubMed Central journal article supplement — BMJ. 2023 Aug 30;382:e072348. doi: 10.1136/bmj-2022-072348 (PMC10466434; doi:10.1136/bmj-2022-072348), 2023-08-30
Supplement: solm072348.ww2.pdf [file solm072348.ww2.pdf]

## Supplementary table of characteristics of included meta-analyses

### Balancing risks and benefits of cannabis use: umbrella review of meta-analyses of randomised controlled trials and observational studies

Marco Solmi(<https://orcid.org/0000-0003-4877-7233>),<sup>1-7</sup> associate professor, Marco De Toffol,<sup>8</sup> psychiatrist, Jong Yeob Kim,<sup>9</sup> public health doctor, Min Je Choi,<sup>9</sup> psychiatrist, Brendon Stubbs,<sup>10,11</sup> advanced fellow, Trevor Thompson,<sup>12</sup> associate professor of clinical research, Joseph Firth,<sup>13,14</sup> research fellow, Alessandro Miola,<sup>15</sup> Giovanni Croatto,<sup>16</sup> psychiatrist, Francesca Baggio,<sup>16</sup> psychiatrist, Silvia Michelin,<sup>17</sup> psychiatrist, Luca Ballan,<sup>17</sup> psychiatrist, Björn Gerdle,<sup>18</sup> professor, Francesco Monaco,<sup>19,20</sup> psychiatrist, Pierluigi Simonato,<sup>21</sup> psychiatrist, Paolo Scocco,<sup>22</sup> psychiatrist, Valdo Ricca,<sup>23</sup> Professor, Giovanni Castellini,<sup>23</sup> associate professor, Michele Fornaro,<sup>24</sup> assistant professor, Andrea Murru,<sup>25</sup> researcher, Eduard Vieta,<sup>25</sup> professor, Paolo Fusar-Poli,<sup>5,26</sup> professor, Corrado Barbui,<sup>27</sup> professor, John P A Ioannidis,<sup>28-30</sup> professor, André F Carvalho,<sup>31</sup> senior researcher, Joaquim Radua,<sup>32</sup> associate professor, Christoph U Correll,<sup>7,33-34</sup> professor, Samuele Cortese,<sup>6,35-38</sup> professor, Robin M Murray,<sup>39</sup> professor, David Castle,<sup>40,41</sup> professor, Jae Il Shin,<sup>42,43</sup> professor, Elena Dragioti,<sup>18,44</sup> associate professor

<sup>1</sup>Department of Psychiatry, University of Ottawa, Ontario, ON, Canada

<sup>2</sup>On Track: The Champlain First Episode Psychosis Program, Department of Mental Health, The Ottawa Hospital, Ontario, ON, Canada

<sup>3</sup>Ottawa Hospital Research Institute, Clinical Epidemiology Program, University of Ottawa, Ottawa, ON, Canada

<sup>4</sup>School of Epidemiology and Public Health, Faculty of Medicine, University of Ottawa, Ottawa, ON, Canada

<sup>5</sup>Early Psychosis: Interventions and Clinical detection Lab, Institute of Psychiatry, Psychology and Neuroscience, Department of Psychosis Studies, King's College London, London, UK

<sup>6</sup>Centre for Innovation in Mental Health-Developmental Lab, School of Psychology, University of Southampton, and NHS Trust, Southampton, UK

<sup>7</sup>Department of Child and Adolescent Psychiatry, Charité Universitätsmedizin, Berlin, Germany

<sup>8</sup>Psychiatry Unit, Veris Delli Ponti Scorrano Hospital, Department of Mental Health, ASL Lecce, Lecce, Italy

<sup>9</sup>Yonsei University College of Medicine, Seoul, South Korea

<sup>10</sup>Department of Psychological Medicine, Institute of Psychiatry, Psychology and Neuroscience, King's College London, London, UK

<sup>11</sup>Physiotherapy Department, South London and Maudsley NHS Foundation Trust, London, UK

<sup>12</sup>Centre of Chronic Illness and Ageing, University of Greenwich, London, UK

- <sup>13</sup>Division of Psychology and Mental Health, University of Manchester, Manchester Academic Health Science Centre, Manchester, UK
- <sup>14</sup>Greater Manchester Mental Health NHS Foundation Trust, Manchester Academic Health Science Centre, Manchester, UK
- <sup>15</sup>Neurosciences Department, Padua Neuroscience Center, University of Padua, Italy
- <sup>16</sup>Mental Health Department, AULSS 3 Serenissima, Mestre, Venice, Italy
- <sup>17</sup>Department of Mental Health, AULSS 7 Pedemontana Veneto, Italy
- <sup>18</sup>Pain and Rehabilitation Centre, Department of Health, Medicine and Caring Sciences, Linköping University, Linköping, Sweden
- <sup>19</sup>Department of Mental Health, Asl Salerno, Salerno, Italy
- <sup>20</sup>European Biomedical Research Institute of Salerno, Salerno, Italy
- <sup>21</sup>Department of Clinical, Pharmaceutical and Biological Sciences, School of Life and Medical Sciences, University of Hertfordshire, Hatfield, UK
- <sup>22</sup>Mental Health Department, ULSS 6 Euganea, Padova, Italy
- <sup>23</sup>Psychiatry Unit, Department of Health Sciences, University of Florence, Florence, Italy
- <sup>24</sup>Section of Psychiatry, Department of Neuroscience, University School of Medicine Federico II, Naples, Italy
- <sup>25</sup>Institute of Neuroscience, Hospital Clinic, University of Barcelona, IDIBAPS, CIBERSAM, Barcelona, Catalonia, Spain
- <sup>26</sup>Department of Brain and Behavioural Sciences, University of Pavia, Pavia, Italy
- <sup>27</sup>WHO Collaborating Centre for Research and Training in Mental Health and Service Evaluation, Department of Neuroscience, Biomedicine and Movement Sciences, Section of Psychiatry, University of Verona, Verona, Italy
- <sup>28</sup>Meta-Research Innovation Center at Stanford, Stanford University, Stanford, CA, USA
- <sup>29</sup>Meta-Research Innovation Center Berlin, Berlin Institute of Health, Charité Universitätsmedizin, Berlin, Germany
- <sup>30</sup>Departments of Medicine, of Epidemiology and Population Health, of Biomedical Data Science, and of Statistics, Stanford University, Stanford, CA, USA
- <sup>31</sup>IMPACT - The Institute for Mental and Physical Health and Clinical Translation, School of Medicine, Barwon Health, Deakin University, Geelong, VIC, Australia
- <sup>32</sup>Institut d'Investigacions Biomediques August Pi i Sunyer, CIBERSAM, Instituto de Salud Carlos III, University of Barcelona, Barcelona, Spain
- <sup>33</sup>Department of Psychiatry, Zucker Hillside Hospital, Northwell Health, Glen Oaks, NY, USA
- <sup>34</sup>Department of Psychiatry and Molecular Medicine, Donald and Barbara Zucker School of Medicine at Hofstra/Northwell, Hempstead, NY, USA
- <sup>35</sup>Clinical and Experimental Sciences (Central Nervous System and Psychiatry), Faculty of Medicine, University of Southampton, Southampton, UK
- <sup>36</sup>Solent NHS Trust, Southampton, UK

<sup>37</sup>Division of Psychiatry and Applied Psychology, School of Medicine, University of Nottingham, Nottingham, UK

<sup>38</sup>Hassenfeld Children's Hospital at NYU Langone, New York University Child Study Center, New York City, New York, NY, USA

<sup>39</sup>Psychosis Studies, Institute of Psychiatry, Psychology and Neuroscience, King's College of London, London, UK

<sup>40</sup>Department of Psychiatry, University of Tasmania, Sandy Bay, TAS, Australia

<sup>41</sup>Co-Director, Centre for Mental Health Service Innovation, Department of Health, Tasmania, Australia

<sup>42</sup>Department of Pediatrics, Yonsei University College of Medicine, Seoul, South Korea

<sup>43</sup>Severance Underwood Meta-research Center, Institute of Convergence Science, Yonsei University, Seoul, South Korea

<sup>44</sup>Research Laboratory Psychology of Patients, Families and Health Professionals, Department of Nursing, School of Health Sciences, University of Ioannina, Ioannina, Greece

Correspondence to: M Solmi [msolmi@toh.ca](mailto:msolmi@toh.ca)

Accepted: 27 June 2023.

Supplementary Table of characteristics of included meta-analyses.

| Author, year                                                             | K  | Population (age)                                   | Type of cannabinoid #            | Outcomes                                                    | Quality  |
|--------------------------------------------------------------------------|----|----------------------------------------------------|----------------------------------|-------------------------------------------------------------|----------|
| <b>Meta-analyses of observational studies, or non-randomized studies</b> |    |                                                    |                                  |                                                             |          |
| Asbridge, 2012[1]                                                        | 9  | General population (adolescents, adults)           | THC                              | Car crash death/injuries                                    | <b>M</b> |
| Bhagavan, 2020[2]                                                        | 5  | Insomnia (adults)                                  | CBM                              | Sleep quality/quantity                                      | <b>H</b> |
| Blest-Hopley, 2019[3]                                                    | 12 | General population (adolescents, adults)           | Regular cannabis use             | Brain executive and default mode network                    | <b>M</b> |
| Bogaty, 2018[4]                                                          | 14 | Psychosis (adolescents, adults)                    | Cannabis current use             | Cognition                                                   | <b>M</b> |
| Borges, 2016[5]                                                          | 16 | General population (adolescents, adults)           | Cannabis use                     | Suicide ideation, attempt, and suicide                      | <b>M</b> |
| Burns, 2012[6]                                                           | 9  | First episode psychosis (adolescents, adults)      | Cannabis use                     | Duration of untreated psychosis                             | <b>L</b> |
| Chisini, 2019[7]                                                         | 4  | General population (adolescents, adults)           | Cannabis use                     | Periodontitis                                               | <b>L</b> |
| Conner, 2016[8]                                                          | 31 | Pregnant women (adult)                             | Marijuana use                    | LBW                                                         | <b>M</b> |
| De Carvalho, 2015[9]                                                     | 6  | General population (adolescents, adults)           | Marijuana use                    | Head and neck cancer                                        | <b>M</b> |
| Escelsior, 2021[10]                                                      | 16 | General population (adolescents, adults)           | Cannabinoids                     | Self-injurious behaviour                                    | <b>L</b> |
| Farooqui, 2019[11]                                                       | 9  | HCV+ NAFDL (adult)                                 | Marijuana use                    | Liver fibrosis                                              | <b>M</b> |
| Foglia, 2017[12]                                                         | 15 | Psychosis (adolescents, adults)                    | Cannabis use (current, past)     | Antipsychotics adherence                                    | <b>H</b> |
| Ghasemiesfe, 2019[13]                                                    | 25 | General population (adults)                        | Marijuana ever use, use>10y      | Cancer (lung, head and neck, oral, testicular)              | <b>H</b> |
| Ghasemiesfe, 2018[14]                                                    | 22 | General population (adolescents, adults)           | Marijuana use                    | Sputum production and cough                                 | <b>H</b> |
| Gibbs, 2015[15]                                                          | 6  | General population (adult)                         | Cannabis use                     | Mania symptoms                                              | <b>M</b> |
| Goldenberg, 2017[16]                                                     | 20 | Mixed medical conditions~ (adult)                  | Cannabis, cannabinoids           | Health related quality of life                              | <b>M</b> |
| Grant, 2002[17]                                                          | 11 | General population (adult)                         | Cannabis use                     | Cognition                                                   | <b>M</b> |
| Gunn, 2016[18]                                                           | 6  | Pregnant women (adult)                             | Cannabis use                     | Maternal anemia                                             | <b>M</b> |
| Gurney, 2015[19]                                                         | 3  | General population (adults <50)                    | Cannabis use, current            | Testicular cancer, non-seminoma                             | <b>M</b> |
| Hostiuc, 2018[20]                                                        | 24 | General population (adolescents, adults)           | Cannabis use                     | Car events                                                  | <b>M</b> |
| Johnson, 2017[21]                                                        | 13 | General population (adolescents, young adults)     | Cannabis use                     | Physical dating violence                                    | <b>H</b> |
| Kamp, 2018[22]                                                           | 5  | General population (adults)                        | Cannabis use                     | Dopamine receptors, transporter and synthesis               | <b>M</b> |
| Kiburi, 2021[23]                                                         | 18 | General population (adolescent)                    | Cannabis use                     | Psychosis                                                   | <b>H</b> |
| Kraan, 2016[24]                                                          | 7  | Ultra-high risk of psychosis (adolescents, adults) | Cannabis use                     | Psychosis (transition to)                                   | <b>H</b> |
| Lev-Ran, 2014[25]                                                        | 14 | General population (adolescents, adults)           | Cannabis use (normal, heavy)     | Depression                                                  | <b>H</b> |
| Lorenzetti, 2019[26]                                                     | 30 | General population (adolescents, adults)           | Regular cannabis use             | Brain volume                                                | <b>H</b> |
| Marchand, 2022[27]                                                       | 16 | Pregnant women (adults)                            | Marijuana use                    | LBW, SGA, preterm delivery, NICU, Apgar, head circumference | <b>L</b> |
| Moore, 2007[28]                                                          | 35 | General population (adolescents, adults)           | Cannabis use                     | Depression, psychosis symptoms and suicidal ideation        | <b>M</b> |
| Myles, 2012[29]                                                          | 38 | General population (adolescents, adults)           | Cannabis use                     | Age at onset of schizophrenia and other psychoses           | <b>M</b> |
| Noori, 2021*[30]                                                         | 12 | Chronic pain on opioids                            | Cannabis use                     | Opioid use                                                  | <b>L</b> |
| Power, 2021[31]                                                          | 7  | General population (adolescents, young adults)     | Cannabis use, frequent/dependent | IQ, verbal IQ                                               | <b>H</b> |
| Rabin, 2011[32]                                                          | 8  | Schizophrenia (adults)                             | Cannabis use                     | Cognition                                                   | <b>L</b> |
| Rocchetti, 2013[33]                                                      | 14 | General population (adolescents, adults)           | Cannabis use                     | Hippocampal volume                                          | <b>M</b> |
| Rodriguez-Almaraz,                                                       | 5  | Malignant CNS tumors (adults)                      | Cannabis use                     | Survival                                                    | <b>L</b> |

| Author, year                                         | K  | Population (age)                                                  | Type of cannabinoid #          | Outcomes                                                    | Quality |
|------------------------------------------------------|----|-------------------------------------------------------------------|--------------------------------|-------------------------------------------------------------|---------|
| 2020[34]                                             |    |                                                                   |                                |                                                             |         |
| Rogeberg, 2019[35]                                   | 12 | Drivers (adult)                                                   | Cannabis, THC positive         | Car crash and car crash culpability                         | L       |
| Ruisch, 2018[36]                                     | 36 | Pregnant women (adult)                                            | Cannabis use                   | Offspring conduct problems                                  | M       |
| Ruiz-Veguilla, 2012[37]                              | 5  | Psychosis (adolescents, adults)                                   | Cannabis use                   | Neurological soft signs                                     | M       |
| Sabe, 2020[38]                                       | 20 | Schizophrenia (adults)                                            | Cannabis use                   | Negative symptoms                                           | H       |
| Sánchez-Gutiérrez, 2020[39]                          | 7  | First-episode psychosis (adolescents, adults)                     | Cannabis use                   | Cognition                                                   | L       |
| Schoeler, 2016[40]                                   | 24 | Psychosis                                                         | Cannabis use (continued, past) | Psychosis, relapse                                          | M       |
| Schoeler, 2016[41]                                   | 88 | Healthy subjects, psychosis (adult)                               | Cannabis use                   | Cognition                                                   | L       |
| Schreiner, 2012[42]                                  | 33 | General population (adolescents, adults)                          | Cannabis use (past)            | Cognition                                                   | CL      |
| Schumacher, 2018[43]                                 | 11 | General population (adolescent, adult)                            | Cannabis                       | Condom use                                                  | M       |
| Scott, 2018[44]                                      | 69 | General population (adolescent, adult)                            | Cannabis (current, past)       | Cognition                                                   | H       |
| Smith, 2014[45]                                      | 11 | General population (adolescents, adults)                          | Cannabis (heavy use)           | Behavioural inhibition                                      | M       |
| Sultan, 2018[46]                                     | 13 | General population (NR)                                           | THC                            | Heart rate change                                           | M       |
| Szoke, 2014[47]                                      | 29 | General population (adult)                                        | Cannabis use                   | Schizotypy                                                  | M       |
| Wijarnpreecha, 2018[48]                              | 3  | HCV (adult)                                                       | Cannabis use                   | Advanced liver fibrosis                                     | H       |
| Xue, 2021[49]                                        | 10 | General population (adolescents, adults)                          | Cannabis use                   | Anxiety                                                     | L       |
| Zhang, 2015[50]                                      | 6  | General population (adult)                                        | Cannabis use                   | Lung cancer                                                 | L       |
| <b>Meta-analyses of randomised controlled trials</b> |    |                                                                   |                                |                                                             |         |
| Allan, 2018[51]                                      | 22 | Mixed conditions <sup>A</sup> (adults)                            | CBM                            | Pain, spasticity, nausea and vomiting, AEs                  | H       |
| Allende-Salazar, 2017[52]                            | 32 | Mixed conditions (chronic non-cancer pain) <sup>B</sup> (adults)  | CBM                            | Pain                                                        | L       |
| Amato, 2017[53]                                      | 41 | Mixed conditions <sup>C</sup> (adults)                            | CBM                            | Nausea, AEs                                                 | H       |
| Andreae, 2015[54]                                    | 5  | Mixed conditions (chronic neuropathic pain) <sup>D</sup> (adults) | Cannabis (inhaled)             | Pain                                                        | H       |
| Aviram, 2017[55]                                     | 23 | Mixed conditions <sup>E</sup> (adults)                            | CBM                            | Pain, AEs                                                   | L       |
| Bahji, 2020[56]                                      | 9  | Dementia (older persons)                                          | Cannabinoids                   | Psychiatric symptoms                                        | L       |
| Bahji, 2020[57]                                      | 14 | Anxiety (adults)                                                  | Cannabinoids                   | Anxiety, acceptability                                      | H       |
| Bajtel, 2022[58]                                     | 16 | Mixed conditions <sup>F</sup> (adults)                            | CBM                            | Drowsiness, fatigue, headache, nausea                       | M       |
| Black, 2019[59]                                      | 86 | Psychiatric disorders (adults)                                    | THC/CBD                        | Psychiatric symptoms                                        | H       |
| Chesney, 2020[60]                                    | 12 | Mixed conditions <sup>G</sup> (children, adults)                  | CBD                            | AEs                                                         | H       |
| Couch, 2018[61]                                      | 53 | Crohn's (adults)                                                  | THC/CBD                        | Disease activity index                                      | M       |
| Da Rovare, 2017[62]                                  | 16 | Multiple sclerosis/paraplegia (spasticity, adults)                | CBM                            | Dizziness, dry mouth, nausea, somnolence                    | M       |
| De Carvalho, 2020[63]                                | 4  | Treatment-resistant epilepsy (children, adults)                   | Cannabis, CBD                  | Seizures, AEs, Pain                                         | L       |
| De Vita, 2018[64]                                    | 18 | Healthy subjects experimental pain (adults)                       | Cannabinoids                   | Pain                                                        | H       |
| Doeve, 2020[65]                                      | 4  | Inflammatory bowel disease (adults)                               | Cannabis                       | Remission, biomarkers, symptoms, quality of life            | CL      |
| Elliot, 2018[66]                                     | 23 | Epilepsy (children)                                               | CBD                            | Seizures, response, quality of life, sleep, vomit, diarrhea | M       |
| Fu, 2018[67]                                         | 23 | Multiple sclerosis (adult)                                        | Cannabinoids                   | Spasticity, AEs                                             | CL      |

| <b>Author, year</b>       | <b>K</b> | <b>Population (age)</b>                                           | <b>Type of cannabinoid #</b> | <b>Outcomes</b>                                                                                            | <b>Quality</b> |
|---------------------------|----------|-------------------------------------------------------------------|------------------------------|------------------------------------------------------------------------------------------------------------|----------------|
| Gazendam, 2020[68]        | 6        | Surgery (adult)                                                   | CBM                          | Pain                                                                                                       | <b>L</b>       |
| Hauser , 2019[69]         | 4        | Cancer (adult)                                                    | Nabiximol, THC               | Pain, maintenance of opioid dosage, daily breakthrough opioid dosage                                       | <b>H</b>       |
| Hindley, 2020[70]         | 15       | General population (adult)                                        | THC/CBD                      | Psychiatric symptoms                                                                                       | <b>H</b>       |
| Kopelli, 2020[71]         | 3        | Schizophrenia (adult)                                             | CBD                          | Total symptoms, cognition                                                                                  | <b>L</b>       |
| Lattanzi, 2020[72]        | 3        | Dravet syndrome (children)                                        | CBD                          | Seizure, acceptability, AEs                                                                                | <b>CL</b>      |
| Lattanzi, 2020[73]        | 4        | Dravet syndrome, Lennox-Gastaut (children)                        | CBD                          | Seizure                                                                                                    | <b>CL</b>      |
| Lattanzi, 2018[74]        | 2        | Lennox-gastaut syndrome (children)                                | CBD                          | Seizure, tolerability, AEs                                                                                 | <b>H</b>       |
| Lattanzi, 2018[75]        | 4        | Treatment-resistant Dravet syndrome, Lennox-Gastaut (children)    | CBD                          | Seizure, acceptability, tolerability, AEs                                                                  | <b>M</b>       |
| Lobos Urbina, 2016[76]    | 29       | Cancer (adults)                                                   | Cannabinoids                 | Pain, quality of life, AEs                                                                                 | <b>L</b>       |
| McKee, 2021[77]           | 31       | Opioid use disorder and Cannabis use disorder (adults)            | CBM                          | Opioid use and Cannabis use                                                                                | <b>L</b>       |
| McCartney, 2021[78]       | 80       | General population (adults)                                       | THC                          | Driving impairment, cognitive impairment                                                                   | <b>L</b>       |
| Meza, 2017[79]            | 7        | Multiple sclerosis (adults)                                       | Cannabinoids                 | Spasticity, pain, AEs                                                                                      | <b>L</b>       |
| Morales, 2017[80]         | 4        | Cancer (chemotherapy, adults)                                     | Cannabinoids                 | Nausea, vomit, AEs                                                                                         | <b>L</b>       |
| Mucke, 2018[81]           | 16       | Mixed conditions <sup>H</sup> (chronic neuropathic pain, adults)  | CBM                          | Pain, psychological distress, sleep problems                                                               | <b>H</b>       |
| Mucke, 2018[82]           | 8        | Cancer, HIV (adults)                                              | CBM                          | Weight gain                                                                                                | <b>H</b>       |
| Noori, 2021[30]*          | 5        | Cancer pain on opioids                                            | CBM                          | Constipation, nausea, opioid use, pain, sleep, vomit                                                       | <b>L</b>       |
| Rodríguez, 2018[83]       | 9        | Cannabis use disorder (adults)                                    | CBM                          | Abstinence, craving symptoms, AEs                                                                          | <b>L</b>       |
| Ruthirakuhan, 2019[84]    | 6        | Alzheimer's disease (elderlies)                                   | CBM                          | Agitation, cognition, neuropsychiatric symptoms, BMI, Aes, tolerability                                    | <b>H</b>       |
| Sainsbury, 2021[85]       | 17       | Mixed conditions (chronic, neuropathic pain, adults) <sup>I</sup> | CBM, THC/CBD                 | Pain                                                                                                       | <b>L</b>       |
| Spanagel, 2021[86]        | 26       | Mixed conditions (chronic, neuropathic pain, adults) <sup>L</sup> | CBM, THC/CBD                 | Appetite, sleep                                                                                            | <b>H</b>       |
| Simon, 2022[87]           | 4        | Cancer with cachexia (adults)                                     | Cannabinoids                 | Appetite                                                                                                   | <b>L</b>       |
| Smith, 2015[88]           | 23       | Cancer (chemotherapy, adults)                                     | CBM                          | Nausea vomit, dysphoria, euphoria, sedation, dizziness, discontinuation due to Aes, participant preference | <b>H</b>       |
| Stockings, 2018[89]       | 91       | Mixed conditions <sup>M</sup> (chronic pain, non-cancer, adults)  | CBM                          | Pain                                                                                                       | <b>H</b>       |
| Stockings, 2018[90]       | 36       | Epilepsy (any age)                                                | CBM                          | Seizure, quality of life, Aes, tolerability                                                                | <b>M</b>       |
| Sultan, 2017[91]          | 25       | General population (adults)                                       | CBM                          | Heart rate, blood pressure, blood flow                                                                     | <b>M</b>       |
| Thanabalasingam, 2021[92] | 3        | Parkinson's disease (adults)                                      | Cannabinoids                 | Motor symptoms                                                                                             | <b>L</b>       |
| Torres-Moreno, 2018[93]   | 17       | Multiple sclerosis (adults)                                       | CBM                          | Pain, spasticity, bladder dysfunction                                                                      | <b>H</b>       |
| Treves, 2021[94]          | 8        | Mixed conditions <sup>N</sup> (children)                          | CBM, THC/CBD                 | Appetite, gastrointestinal AE, SAE, seizures,                                                              | <b>H</b>       |
| Velayudan, 2021[95]       | 46       | Mixed conditions <sup>O</sup> (adults)                            | CBM                          | Aes, acceptability, tolerability                                                                           | <b>L</b>       |

| Author, year       | K  | Population (age)                                                 | Type of cannabinoid # | Outcomes                             | Quality |
|--------------------|----|------------------------------------------------------------------|-----------------------|--------------------------------------|---------|
| Wang, 2008[96]     | 31 | Mixed conditions <sup>P</sup> (adults)                           | Cannabis              | Aes                                  | L       |
| Wang, 2021[97]     | 32 | Mixed conditions <sup>Q</sup> (chronic pain, adults)             | CBM or cannabinoids   | Pain                                 | H       |
| Watanabe, 2021[98] | 47 | Mixed conditions <sup>R</sup>                                    | CBM                   | Hypotension, orthostatic hypotension | L       |
| Whiting, 2015[99]  | 79 | Mixed conditions <sup>S</sup> (NR)                               | CBM, THC/CBD          | Aes                                  | H       |
| Wong, 2020[100]    | 43 | Mixed conditions <sup>T</sup> (chronic pain, non-cancer, adults) | Cannabinoids          | Pain                                 | L       |
| Zhang, 2021[101]   | 2  | Schizophrenia (adults)                                           | CBD                   | Psychotic symptoms                   | L       |

Legend. **ADHD**, attention-deficit/hyperactivity disorders; **AE**, adverse events; **BMI**, body mass index; **CBD**, cannabidiol; **CBM**, cannabis-based medications; **CNS**, central nervous system; **HCV**, hepatitis C virus; **HIV**, human immunodeficiency virus; **IQ**, intelligent quotient; **k**, number of studies included in the overall eligible systematic review with meta-analysis; **LBW**, low birth weight; **NAFLD**, non-alcoholic fatty liver disease; **NICU**, admission to neonatal intensive care unit; **NR**, not reported; **SGA**, small for gestational age; **SNP**, single nucleotide polymorphism; **THC**, tetrahydrocannabinol; \*, included both observational studies and randomized controlled trials; ~, fibromyalgia, HIV, IBD, neuropathic pain; #, specific SNPs are reported in Supplementary Table 8; **A**, neuropathic pain, cancer pain, chemotherapy; **B**, neuropathic pain, MS, diabetic neuropathy, HIV, fibromyalgia, muscular pain, rheumatoid arthritis, spasticity; **C**, multiple sclerosis, chronic pain, chemotherapy in cancer; **D**, (HIV, trauma, surgery, complex regional pain syndrome (CRPS) type I, spinal cord injury, peripheral neuropathy, or nerve injury; **E**, cancer pain, opioid resistant chronic cancer pain, advanced stage cancer pain, spinal cord injury, abdominal pain, chronic neuropathic pain, multiple sclerosis, brachial plexus root avulsion, chronic upper motor neuron syndrome, rheumatoid arthritis, HIV, allodynia, unilateral neuropathic pain, fibromyalgia, CRPS type I, knee osteoarthritis, central neuropathic pain, familial Mediterranean fever, diabetes; **F**, Alzheimer's Disease, Spinal cord injury, fibromyalgia, spasticity related pain, functional chest pain, Multiple Sclerosis, Dementia, gastrointestinal transit and postprandial satiation in healthy human subjects, IBD, capsaicin-induced pain and hyperalgesia, experimental heat pain; **G**, Fatty Liver Disease, diabetes mellitus type II, schizophrenia, healthy subjects, epilepsy; **H**, plexus root avulsion, HIV neuropathy, chronic central and PNP, central neuropathic pain in multiple sclerosis, chemotherapy-induced neuropathic pain, diabetic neuropathy, unilateral neuropathic pain, Chronic diabetic peripheral polyneuropathy in diabetes mellitus type 1 and 2, post-herpetic neuralgia, peripheral neuropathy, focal nerve lesion, radiculopathy or CRPS type 2 associated with allodynia, trauma, surgery, phantom limb pain; **I**, HIV, nerve injury, peripheral neuropathic pain, allodynia, diabetic neuropathy, radiculopathy, complex regional pain syndrome type 2, post-herpetic neuralgia, peripheral neuropathy, spinal cord injury, brachial plexus damage, multiple sclerosis, limb amputation; **L**, Dravet syndrome, Lennox-Gastaut syndrome, Tuberosclerosis complex, Schizophrenia, Opioid dependent, Chronic pancreatitis, Cannabis dependent, multiple sclerosis, Alzheimers disease, Parkinson disease or mixed/vascular dementia, miscellaneous cancer in chemotherapy, chronic headache, cocaine use disorder, brachial plexus lesion and neuropathy, phantom limb, Fibromyalgia; **M**, HIV, multiple sclerosis, brachial plexus avulsion, rheumatoid arthritis, Parkinson disease, fibromyalgia, chronic pancreatitis, spinal cord injury, chemotherapy, nociceptive pain, medication overuse headache pain, amyotrophic lateral sclerosis, diabetes, upper motor neuron syndrome, irritable bowel syndrome; **N**, autism spectrum disorder, cancer, cerebral palsy, Dravet syndrome, intellectual disability; **O**, healthy older, dementia, cancer patients with chemosensory alterations, obstructive sleep apnoea, Huntington disease, chronic pancreatitis, Alzheimer disease, cancer-related anorexia, cancer-related pain, chemotherapy induced nausea and vomiting, Parkinson disease, multiple sclerosis, intraocular pressure, diabetic peripheral neuropathic pain, fibromyalgia amyotrophic lateral sclerosis, cervical dystonia, rheumatoid arthritis, type 2 diabetes, chronic obstructive pulmonary disease, healthy controls, motor neurone disease; **P**, Multiple sclerosis, rheumatoid arthritis, neuropathic pain, brachial plexus avulsion, glaucoma, post-operative pain, chemotherapy, cancer, HIV, idiopathic Parkinson's disease; **Q**, Cancer-related chronic pain, Diabetic neuropathy, Peripheral neuropathic pain, Chronic neuropathic pain, Central neuropathic pain in multiple sclerosis, Spinal cord injury-related neuropathic pain, HIV-Associated Neuropathic Pain, Multiple sclerosis, Chronic upper motor neuron syndrome, Fibromyalgia, Endometriosis-related chronic pelvic pain, Vestibulodynia, Chronic abdominal pain, Chronic prostatitis/chronic pelvic pain syndrome, Rheumatoid arthritis, Osteoarthritis, Chronic refractory pain related to musculoskeletal system, Mixed chronic non-cancer pain, Medication overuse headache; **R**, Cannabis dependence, Cancer-related pain, Chronic noncancer pain, Fibromyalgia, Neuropathic pain, Chemotherapy-induced nausea and vomiting, Capsaicin-induced pain and hyperalgesia, dementia, Cervical dystonia, Anorexia associated with weight loss in patients with AIDS, Asthma, Pain management in healthy subjects, Ocular hypertension or early primary openangle glaucoma, multiple sclerosis, Neurogenic symptoms, Levodopa-induced dyskinesia, Primary anorexia nervosa, Analgesic effect in healthy patients, Postoperative pain, IBS, GERD; **S**, Chemotherapy with nausea and vomiting, chronic pain, HIV with loss of appetite, spasticity due to MS or paraplegia, depression, anxiety disorders, sleep disorders, glaucoma, or Tourette syndrome; **T**, multiple sclerosis, neuropathic pain, upper motor neuron syndrome, fibromyalgia, spinal cord injury, headache, diabetic neuropathy, osteoarthritis pain of the knee, chronic pancreatitis, functional chest pain, HIV, post-surgical and post-traumatic pain, brachial plexus avulsion, rheumatoid arthritis, chemotherapy. \*, has both observational studies and randomized controlled trials

## References

- 1 Asbridge M, Hayden JA, Cartwright JL. Acute cannabis consumption and motor vehicle collision risk: systematic review of observational studies and meta-analysis. *BMJ* 2012;**344**:e536. doi:10.1136/bmj.e536
- 2 Bhagavan C, Kung S, Doppen M, *et al.* Cannabinoids in the Treatment of Insomnia Disorder: A Systematic Review and Meta-Analysis. *CNS Drugs* 2020;**34**:1217–28. doi:10.1007/s40263-020-00773-x
- 3 Blest-Hopley G, Giampietro V, Bhattacharyya S. Residual effects of cannabis use in adolescent and adult brains - A meta-analysis of fMRI studies. *Neurosci Biobehav Rev* 2018;**88**:26–41. doi:10.1016/j.neubiorev.2018.03.008
- 4 Bogaty SER, Lee RSC, Hickie IB, *et al.* Meta-analysis of neurocognition in young psychosis patients with current cannabis use. *J. Psychiatr. Res.* 2018;**99**:22–32. doi:10.1016/j.jpsychires.2018.01.010
- 5 Borges G, Bagge CL, Orozco R. A literature review and meta-analyses of cannabis use and suicidality. *J Affect Disord* 2016;**195**:63–74. doi:10.1016/j.jad.2016.02.007
- 6 K. Burns J. Cannabis use and Duration of Untreated Psychosis: A Systematic Review and Meta-Analysis. *Curr. Pharm. Des.* 2012;**18**:5093–104. doi:http://dx.doi.org/10.2174/138161212802884672
- 7 Chisini LA, Cademartori MG, Francia A, *et al.* Is the use of Cannabis associated with periodontitis? A systematic review and meta-analysis. *J Periodontal Res* 2019;**54**:311–7. doi:10.1111/jre.12639
- 8 Conner SN, Bedell V, Lipsey K, *et al.* Maternal Marijuana Use and Adverse Neonatal Outcomes: A Systematic Review and Meta-analysis. *Obstet. Gynecol.* 2016;**128**:713–23. doi:10.1097/AOG.0000000000001649
- 9 de Carvalho MFF, Dourado MR, Fernandes IB, *et al.* Head and neck cancer among marijuana users: A meta-analysis of matched case–control studies. *Arch Oral Biol* 2015;**60**:1750–5. doi:https://doi.org/10.1016/j.archoralbio.2015.09.009
- 10 Escelsior A, Belvederi Murri M, Corsini G Pietro, *et al.* Cannabinoid use and self-injurious behaviours: A systematic review and meta-analysis. *J Affect Disord* 2021;**278**:85–98. doi:https://doi.org/10.1016/j.jad.2020.09.020
- 11 Farooqui MT, Khan MA, Cholankeril G, *et al.* Marijuana is not associated with progression of hepatic fibrosis in liver disease: A systematic review and meta-analysis. *Eur. J. Gastroenterol. Hepatol.* 2019;**31**:149–56. doi:10.1097/MEG.0000000000001263
- 12 Foglia E, Schoeler T, Klamerus E, *et al.* Cannabis use and adherence to antipsychotic medication: a systematic review and meta-analysis. *Psychol Med* 2017;**47**:1691–705. doi:DOI: 10.1017/S0033291717000046
- 13 Ghasemiesfe M, Barrow B, Leonard S, *et al.* Association between Marijuana Use and Risk of Cancer: A Systematic Review and Meta-analysis. *JAMA Netw. Open.* 2019;**2**. doi:10.1001/jamanetworkopen.2019.16318
- 14 Ghasemiesfe M, Ravi D, Vali M, *et al.* Marijuana Use, Respiratory Symptoms, and Pulmonary Function. *Ann Intern Med* 2018;**169**:106–15. doi:10.7326/M18-0522
- 15 Gibbs M, Winsper C, Marwaha S, *et al.* Cannabis use and mania symptoms: A systematic review and meta-analysis. *J. Affect. Disord.* 2015;**171**:39–47. doi:10.1016/j.jad.2014.09.016



- 16 Goldenberg M, Reid MW, IsHak WW, *et al.* The impact of cannabis and cannabinoids for medical conditions on health-related quality of life: A systematic review and meta-analysis. *Drug Alcohol Depend* 2017;**174**:80–90. doi:<https://doi.org/10.1016/j.drugalcdep.2016.12.030>
- 17 Grant I, Gonzalez R, Carey C, *et al.* Non-acute (residual) neurocognitive effects of cannabis use: A meta-analytic study. *J Int Neuropsychol Soc* 2003;**9**:679–89. doi:10.1017/S1355617703950016
- 18 Gunn JKL, Rosales CB, Center KE, *et al.* Prenatal exposure to cannabis and maternal and child health outcomes: A systematic review and meta-analysis. *BMJ Open*. 2016;**6**:e009986. doi:10.1136/bmjopen-2015-009986
- 19 Gurney J, Shaw C, Stanley J, *et al.* Cannabis exposure and risk of testicular cancer: A systematic review and meta-analysis. *BMC Cancer* 2015;**15**:1–10. doi:10.1186/s12885-015-1905-6
- 20 Hostiuc S, Moldoveanu A, Negoii I, *et al.* The Association of Unfavorable Traffic Events and Cannabis Usage: A Meta-Analysis. *Front Pharmacol* 2018;**9**:99. doi:10.3389/fphar.2018.00099
- 21 Johnson RM, LaValley M, Schneider KE, *et al.* Marijuana use and physical dating violence among adolescents and emerging adults: A systematic review and meta-analysis. *Drug Alcohol Depend*. 2017;**174**:47–57. doi:10.1016/j.drugalcdep.2017.01.012
- 22 Kamp F, Proebstl L, Penzel N, *et al.* Effects of sedative drug use on the dopamine system: a systematic review and meta-analysis of in vivo neuroimaging studies. *Neuropsychopharmacology* 2019;**44**:660–7. doi:10.1038/s41386-018-0191-9
- 23 Kiburi SK, Molebatsi K, Ntlantsana V, *et al.* Cannabis use in adolescence and risk of psychosis: Are there factors that moderate this relationship? A systematic review and meta-analysis. *Subst. Abus.* 2021;**1**:1–25. doi:10.1080/08897077.2021.1876200
- 24 Kraan T, Velthorst E, Koenders L, *et al.* Cannabis use and transition to psychosis in individuals at ultra-high risk: review and meta-analysis. *Psychol Med* 2016;**46**:673–81. doi:DOI: 10.1017/S0033291715002329
- 25 Lev-Ran S, Roerecke M, Le Foll B, *et al.* The association between cannabis use and depression: A systematic review and meta-analysis of longitudinal studies. *Psychol Med* 2014;**44**:797–810. doi:10.1017/S0033291713001438
- 26 Lorenzetti V, Chye Y, Silva P, *et al.* Does regular cannabis use affect neuroanatomy? An updated systematic review and meta-analysis of structural neuroimaging studies. *Eur Arch Psychiatry Clin Neurosci* 2019;**269**:59–71. doi:10.1007/s00406-019-00979-1
- 27 Marchand G, Masoud AT, Govindan M, *et al.* Birth Outcomes of Neonates Exposed to Marijuana in Utero: A Systematic Review and Meta-analysis. *JAMA Netw open* 2022;**5**:e2145653–e2145653. doi:10.1001/jamanetworkopen.2021.45653
- 28 Moore THM, Zammit S, Lingford-Hughes A, *et al.* Cannabis use and risk of psychotic or affective mental health outcomes: a systematic review. *Lancet* 2007;**370**:319–28. doi:[https://doi.org/10.1016/S0140-6736\(07\)61162-3](https://doi.org/10.1016/S0140-6736(07)61162-3)
- 29 Myles N, Newall H, Nielssen O, *et al.* The Association between Cannabis Use and Earlier Age at Onset of Schizophrenia and other Psychoses: Meta-analysis of Possible Confounding Factors. *Curr. Pharm. Des.* 2012;**18**:5055–69. doi:<http://dx.doi.org/10.2174/138161212802884816>
- 30 Noori A, Miroshnychenko A, Shergill Y, *et al.* Opioid-sparing effects of medical cannabis or cannabinoids for chronic pain: a systematic review and meta-analysis of randomised and

- observational studies. *BMJ Open* 2021;**11**:e047717–e047717. doi:10.1136/bmjopen-2020-047717
- 31 Power E, Sabherwal S, Healy C, *et al.* Intelligence quotient decline following frequent or dependent cannabis use in youth: a systematic review and meta-analysis of longitudinal studies. *Psychol Med* 2021;**51**:194–200. doi:DOI: 10.1017/S0033291720005036
  - 32 Rabin RA, Zakzanis KK, George TP. The effects of cannabis use on neurocognition in schizophrenia: A meta-analysis. *Schizophr Res* 2011;**128**:111–6. doi:https://doi.org/10.1016/j.schres.2011.02.017
  - 33 Rocchetti M, Crescini A, Borgwardt S, *et al.* Is cannabis neurotoxic for the healthy brain? A meta-analytical review of structural brain alterations in non-psychotic users. *Psychiatry Clin Neurosci* 2013;**67**:483–92. doi:https://doi.org/10.1111/pcn.12085
  - 34 Rodriguez-Almaraz J-E, Chang S, Clarke J, *et al.* A systematic review and meta-analysis examining the effects of cannabis and its derivatives in adults with malignant CNS tumors. *Neuro-Oncology Pract* 2020;**7**:376–83. doi:10.1093/nop/npaa013
  - 35 Rogeberg O. A meta-analysis of the crash risk of cannabis-positive drivers in culpability studies—Avoiding interpretational bias. *Accid Anal Prev* 2019;**123**:69–78. doi:https://doi.org/10.1016/j.aap.2018.11.011
  - 36 Ruisch IH, Dietrich A, Glennon JC, *et al.* Maternal substance use during pregnancy and offspring conduct problems: A meta-analysis. *Neurosci. Biobehav. Rev.* 2018;**84**:325–36. doi:10.1016/j.neubiorev.2017.08.014
  - 37 Ruiz-Veguilla M, F. Callado L, Ferrin M. Neurological Soft Signs in Patients with Psychosis and Cannabis Abuse: A Systematic Review and Meta-Analysis of Paradox. *Curr. Pharm. Des.* 2012;**18**:5156–64. doi:http://dx.doi.org/10.2174/138161212802884753
  - 38 Sabe M, Zhao N, Kaiser S. Cannabis, nicotine and the negative symptoms of schizophrenia: Systematic review and meta-analysis of observational studies. *Neurosci Biobehav Rev* 2020;**116**:415–25. doi:https://doi.org/10.1016/j.neubiorev.2020.07.007
  - 39 Sánchez-Gutiérrez T, Fernández-Castilla B, Barbeito S, *et al.* Cannabis use and nonuse in patients with first-episode psychosis: A systematic review and meta-analysis of studies comparing neurocognitive functioning. *Eur Psychiatry* 2020;**63**:e6. doi:DOI: 10.1192/j.eurpsy.2019.9
  - 40 Schoeler T, Monk A, Sami MB, *et al.* Continued versus discontinued cannabis use in patients with psychosis: a systematic review and meta-analysis. *The Lancet Psychiatry* 2016;**3**:215–25. doi:https://doi.org/10.1016/S2215-0366(15)00363-6
  - 41 Schoeler T, Kambeitz J, Behlke I, *et al.* The effects of cannabis on memory function in users with and without a psychotic disorder: Findings from a combined meta-analysis. *Psychol Med* 2016;**46**:177–88. doi:10.1017/S0033291715001646
  - 42 Schreiner AM, Dunn ME. Residual effects of cannabis use on neurocognitive performance after prolonged abstinence: A meta-analysis. *Exp. Clin. Psychopharmacol.* 2012;**20**:420–9. doi:10.1037/a0029117
  - 43 Schumacher A, Marzell M, Toepp AJ, *et al.* Association between marijuana use and condom use: A meta-analysis of between-subject event-based studies. *J Stud Alcohol Drugs* 2018;**79**:361–9. doi:10.15288/jsad.2018.79.361
  - 44 Scott JC, Slomiak ST, Jones JD, *et al.* Association of Cannabis With Cognitive Functioning in

- Adolescents and Young Adults: A Systematic Review and Meta-analysis. *JAMA psychiatry* 2018;**75**:585–95. doi:10.1001/jamapsychiatry.2018.0335
- 45 Smith JL, Mattick RP, Jamadar SD, *et al.* Deficits in behavioural inhibition in substance abuse and addiction: A meta-analysis. *Drug Alcohol Depend* 2014;**145**:1–33. doi:https://doi.org/10.1016/j.drugalcdep.2014.08.009
- 46 Sultan SR, Millar SA, O’Sullivan SE, *et al.* A systematic review and meta-analysis of the in vivo haemodynamic effects of  $\Delta$ 9-tetrahydrocannabinol. *Pharmaceuticals*. 2018;**11**:13. doi:10.3390/ph11010013
- 47 Szoke A, Galliot A-M, Richard J-R, *et al.* Association between cannabis use and schizotypal dimensions – A meta-analysis of cross-sectional studies. *Psychiatry Res* 2014;**219**:58–66. doi:https://doi.org/10.1016/j.psychres.2014.05.008
- 48 Wijarnpreecha K, Panjawatnan P, Ungprasert P. Use of cannabis and risk of advanced liver fibrosis in patients with chronic hepatitis C virus infection: A systematic review and meta-analysis. *J Evid Based Med* 2018;**11**:272–7. doi:https://doi.org/10.1111/jebm.12317
- 49 Xue S, Husain MI, Zhao H, *et al.* Cannabis Use and Prospective Long-Term Association with Anxiety: A Systematic Review and Meta-Analysis of Longitudinal Studies: Usage du cannabis et association prospective à long terme avec l’anxiété: une revue systématique et une méta-analyse d’études I. *Can J Psychiatry* 2021;**66**:126–38. doi:10.1177/0706743720952251
- 50 Zhang LR, Morgenstern H, Greenland S, *et al.* Cannabis smoking and lung cancer risk: Pooled analysis in the International Lung Cancer Consortium. *Int J Cancer* 2015;**136**:894–903. doi:https://doi.org/10.1002/ijc.29036
- 51 Allan GM, Finley CR, Ton J, *et al.* Systematic review of systematic reviews for medical cannabinoids: Pain, nausea and vomiting, spasticity, and harms. *Can Fam Physician* 2018;**64**:e78–94.
- 52 Allende-Salazar R, Rada G. Are cannabinoids an effective treatment for chronic non-cancer pain? *Medwave* 2017;**17**:e6972. doi:10.5867/medwave.2017.6972
- 53 Amato L, Minozzi S, Mitrova Z, *et al.* Revisione sistematica sull’efficacia terapeutica e la sicurezza della cannabis per i pazienti affetti da sclerosi multipla, dolore neuropatico cronico e pazienti oncologici che assumono chemioterapia. *Epidemiol Prev* 2017;**41**. doi:10.19191/EP17.5-6.AD01.069
- 54 Andreae MH, Carter GM, Shaparin N, *et al.* Inhaled Cannabis for Chronic Neuropathic Pain: A Meta-analysis of Individual Patient Data. *J Pain* 2015;**16**:1221–32. doi:10.1016/j.jpain.2015.07.009
- 55 Aviram J, Samuelly-Leichtag G. Efficacy of Cannabis-Based Medicines for Pain Management: A Systematic Review and Meta-Analysis of Randomized Controlled Trials. *Pain Physician* 2017;**Sep**:E755–96.
- 56 Bahji A, Meyyappan AC, Hawken ER. Cannabinoids for the Neuropsychiatric Symptoms of Dementia: A Systematic Review and Meta-Analysis. *Can. J. Psychiatry*. 2020;**65**:365–76. doi:10.1177/0706743719892717
- 57 Bahji A, Meyyappan AC, Hawken ER. Efficacy and acceptability of cannabinoids for anxiety disorders in adults: A systematic review & meta-analysis. *J Psychiatr Res* 2020;**129**:257–64. doi:https://doi.org/10.1016/j.jpsychires.2020.07.030
- 58 Bajtel Á, Kiss T, Tóth B, *et al.* The Safety of Dronabinol and Nabilone: A Systematic Review and

- Meta-Analysis of Clinical Trials. *Pharm.* . 2022;**15**. doi:10.3390/ph15010100
- 59 Black N, Stockings E, Campbell G, *et al.* Cannabinoids for the treatment of mental disorders and symptoms of mental disorders: a systematic review and meta-analysis. *The Lancet Psychiatry* 2019;**6**:995–1010. doi:10.1016/S2215-0366(19)30401-8
- 60 Chesney E, Oliver D, Green A, *et al.* Adverse effects of cannabidiol: a systematic review and meta-analysis of randomized clinical trials. *Neuropsychopharmacol Off Publ Am Coll Neuropsychopharmacol* 2020;**45**:1799–806. doi:10.1038/s41386-020-0667-2
- 61 Couch DG, Maudslay H, Doleman B, *et al.* The Use of Cannabinoids in Colitis: A Systematic Review and Meta-Analysis. *Inflamm Bowel Dis* 2018;**24**:680–97. doi:10.1093/ibd/izy014
- 62 da Rovare VP, Magalhães GPA, Jardini GDA, *et al.* Cannabinoids for spasticity due to multiple sclerosis or paraplegia: A systematic review and meta-analysis of randomized clinical trials. *Complement. Ther. Med.* 2017;**34**:170–85. doi:10.1016/j.ctim.2017.08.010
- 63 de Carvalho Reis R, Almeida KJ, da Silva Lopes L, *et al.* Efficacy and adverse event profile of cannabidiol and medicinal cannabis for treatment-resistant epilepsy: Systematic review and meta-analysis. *Epilepsy Behav* 2020;**102**:106635. doi:https://doi.org/10.1016/j.yebeh.2019.106635
- 64 De Vita MJ, Moskal D, Maisto SA, *et al.* Association of Cannabinoid Administration with Experimental Pain in Healthy Adults: A Systematic Review and Meta-analysis. *JAMA Psychiatry* 2018;**75**:1118–27. doi:10.1001/jamapsychiatry.2018.2503
- 65 Doeve BH, van de Meeberg MM, van Schaik FDM, *et al.* A Systematic Review With Meta-Analysis of the Efficacy of Cannabis and Cannabinoids for Inflammatory Bowel Disease: What Can We Learn From Randomized and Nonrandomized Studies? *J. Clin. Gastroenterol.* 2021;**55**:798–809. doi:10.1097/MCG.0000000000001393
- 66 Elliott J, DeJean D, Clifford T, *et al.* Cannabis-based products for pediatric epilepsy: A systematic review. *Epilepsia* 2019;**60**:6–19. doi:10.1111/epi.14608
- 67 Fu X, Wang Y, Wang C, *et al.* A mixed treatment comparison on efficacy and safety of treatments for spasticity caused by multiple sclerosis: a systematic review and network meta-analysis. *Clin Rehabil* 2018;**32**:713–21. doi:10.1177/0269215517745348
- 68 Gazendam A, Nucci N, Gouveia K, *et al.* Cannabinoids in the Management of Acute Pain: A Systematic Review and Meta-analysis. *Cannabis cannabinoid Res* 2020;**5**:290–7. doi:10.1089/can.2019.0079
- 69 Häuser W, Welsch P, Klose P, *et al.* Efficacy, tolerability and safety of cannabis-based medicines for cancer pain: A systematic review with meta-analysis of randomised controlled trials. *Schmerz.* 2019;**33**:424–36. doi:10.1007/s00482-019-0373-3
- 70 Hindley G, Beck K, Borgan F, *et al.* Psychiatric symptoms caused by cannabis constituents: a systematic review and meta-analysis. *The Lancet Psychiatry* 2020;**7**:344–53. doi:10.1016/S2215-0366(20)30074-2
- 71 Kopelli E, Samara M, Siargkas A, *et al.* The role of cannabidiol oil in schizophrenia treatment. a systematic review and meta-analysis. *Psychiatry Res* 2020;**291**:113246. doi:https://doi.org/10.1016/j.psychres.2020.113246
- 72 Lattanzi S, Brigo F, Trinka E, *et al.* Adjunctive Cannabidiol in Patients with Dravet Syndrome: A Systematic Review and Meta-Analysis of Efficacy and Safety. *CNS Drugs* 2020;**34**:229–41. doi:10.1007/s40263-020-00708-6

- 73 Lattanzi S, Trinka E, Striano P, *et al.* Cannabidiol efficacy and clobazam status: A systematic review and meta-analysis. *Epilepsia* 2020;**61**:1090–8. doi:<https://doi.org/10.1111/epi.16546>
- 74 Lattanzi S, Brigo F, Cagnetti C, *et al.* Efficacy and Safety of Adjunctive Cannabidiol in Patients with Lennox–Gastaut Syndrome: A Systematic Review and Meta-Analysis. *CNS Drugs*. 2018;**32**:905–16. doi:[10.1007/s40263-018-0558-9](https://doi.org/10.1007/s40263-018-0558-9)
- 75 Lattanzi S, Brigo F, Trinka E, *et al.* Efficacy and Safety of Cannabidiol in Epilepsy: A Systematic Review and Meta-Analysis. *Drugs* 2018;**78**:1791–804. doi:[10.1007/s40265-018-0992-5](https://doi.org/10.1007/s40265-018-0992-5)
- 76 Lobos Urbina D, Pena Duran J. Are cannabinoids effective for treatment of pain in patients with active cancer? *Medwave* 2016;**16(Suppl3)**:e6539. doi:[10.5867/medwave.2016.6539](https://doi.org/10.5867/medwave.2016.6539)
- 77 McKee KA, Hmidan A, Crocker CE, *et al.* Potential therapeutic benefits of cannabinoid products in adult psychiatric disorders: A systematic review and meta-analysis of randomised controlled trials. *J Psychiatr Res* 2021;**140**:267–81. doi:<https://doi.org/10.1016/j.jpsychires.2021.05.044>
- 78 McCartney D, Arkell TR, Irwin C, *et al.* Determining the magnitude and duration of acute  $\Delta 9$ -tetrahydrocannabinol ( $\Delta 9$ -THC)-induced driving and cognitive impairment: A systematic and meta-analytic review. *Neurosci Biobehav Rev* 2021;**126**:175–93. doi:<https://doi.org/10.1016/j.neubiorev.2021.01.003>
- 79 Meza R, Pena J, Garcia K, *et al.* Are cannabinoids effective in multiple sclerosis? *Medwave* 2017;**17(Suppl1)**. doi:[10.5867/medwave.2017.6865](https://doi.org/10.5867/medwave.2017.6865)
- 80 Morales M, Corsi O, Pena J. Are cannabinoids effective for the management of chemotherapy induced nausea and vomiting? *Medwave* 2017;**Nov-Dic**:e7119. doi:[10.5867/medwave.2017.09.7119](https://doi.org/10.5867/medwave.2017.09.7119)
- 81 Mücke M, Phillips T, Radbruch L, *et al.* Cannabis-based medicines for chronic neuropathic pain in adults. *Cochrane Database Syst. Rev.* 2018;**2018**. doi:[10.1002/14651858.CD012182.pub2](https://doi.org/10.1002/14651858.CD012182.pub2)
- 82 Mücke M, Weier M, Carter C, *et al.* Systematic review and meta-analysis of cannabinoids in palliative medicine. *J. Cachexia. Sarcopenia Muscle.* 2018;**9**:220–34. doi:[10.1002/jcsm.12273](https://doi.org/10.1002/jcsm.12273)
- 83 Rodríguez A, Zavala C. Cannabinoids for the treatment of cannabis abuse disorder. *Medwave* 2018;**18**:e7286–e7286. doi:[10.5867/medwave.2018.06.7286](https://doi.org/10.5867/medwave.2018.06.7286)
- 84 Ruthirakuhan M, Lanctot K, Vieira D, *et al.* Natural and Synthetic Cannabinoids for Agitation and Aggression in Alzheimer’s Disease: A Meta-Analysis. *J Clin Psychiatry* 2019;**Jan 29**:18r12617. doi:[10.4088/JCP.18r12617](https://doi.org/10.4088/JCP.18r12617)
- 85 Sainsbury B, Bloxham J, Pour MH, *et al.* Efficacy of cannabis-based medications compared to placebo for the treatment of chronic neuropathic pain: a systematic review with meta-analysis. *J Dent Anesth Pain Med* 2021;**21**:479–506.
- 86 Spanagel R, Bilbao A. Approved cannabinoids for medical purposes – Comparative systematic review and meta-analysis for sleep and appetite. *Neuropharmacology* 2021;**196**:108680. doi:<https://doi.org/10.1016/j.neuropharm.2021.108680>
- 87 Simon L, Baldwin C, Kalea AZ, *et al.* Cannabinoid interventions for improving cachexia outcomes in cancer: a systematic review and meta-analysis. *J Cachexia Sarcopenia Muscle* 2022;**13**:23–41. doi:<https://doi.org/10.1002/jcsm.12861>
- 88 Smith LA, Azariah F, Lavender VT, *et al.* Cannabinoids for nausea and vomiting in adults with cancer receiving chemotherapy. *Cochrane Database Syst. Rev.* 2015;**2015**. doi:[10.1002/14651858.CD009464.pub2](https://doi.org/10.1002/14651858.CD009464.pub2)

- 89 Stockings E, Campbell G, Hall WD, *et al.* Cannabis and cannabinoids for the treatment of people with chronic noncancer pain conditions: A systematic review and meta-analysis of controlled and observational studies. *Pain*. 2018;**159**:1932–54. doi:10.1097/j.pain.0000000000001293
- 90 Stockings E, Zagic D, Campbell G, *et al.* Evidence for cannabis and cannabinoids for epilepsy: a systematic review of controlled and observational evidence. *J Neurol Neurosurg Psychiatry* 2018;**89**:741–53. doi:10.1136/jnnp-2017-317168
- 91 Sultan SR, Millar SA, England TJ, *et al.* A Systematic Review and Meta-Analysis of the Haemodynamic Effects of Cannabidiol. *Front Pharmacol* 2017;**8**. doi:10.3389/fphar.2017.00081
- 92 Thanabalasingam SJ, Ranjith B, Jackson R, *et al.* Cannabis and its derivatives for the use of motor symptoms in Parkinson’s disease: a systematic review and meta-analysis. *Ther Adv Neurol Disord* 2021;**14**:17562864211018560. doi:10.1177/17562864211018561
- 93 Torres-Moreno MC, Papaseit E, Torrens M, *et al.* Assessment of Efficacy and Tolerability of Medicinal Cannabinoids in Patients With Multiple Sclerosis: A Systematic Review and Meta-analysis. *JAMA Netw open* 2018;**1**:e183485. doi:10.1001/jamanetworkopen.2018.3485
- 94 Treves N, Mor N, Allegaert K, *et al.* Efficacy and safety of medical cannabinoids in children: a systematic review and meta-analysis. *Sci Rep* 2021;**11**:23462. doi:10.1038/s41598-021-02770-6
- 95 Velayudhan L, McGoohan K, Bhattacharyya S. Safety and tolerability of natural and synthetic cannabinoids in adults aged over 50 years: A systematic review and meta-analysis. *PLOS Med* 2021;**18**:e1003524.
- 96 Wang T, Collet JP, Shapiro S, *et al.* Adverse effects of medical cannabinoids: A systematic review. *CMAJ*. 2008;**178**:1669–78. doi:10.1503/cmaj.071178
- 97 Wang L, Hong PJ, May C, *et al.* Medical cannabis or cannabinoids for chronic non-cancer and cancer related pain: a systematic review and meta-analysis of randomised clinical trials. *BMJ* 2021;**374**:n1034. doi:10.1136/bmj.n1034
- 98 Watanabe AH, Navaravong L, Sirilak T, *et al.* A systematic review and meta-analysis of randomized controlled trials of cardiovascular toxicity of medical cannabinoids. *J Am Pharm Assoc* 2021;**61**:e1–13. doi:https://doi.org/10.1016/j.japh.2021.03.013
- 99 Whiting PF, Wolff RF, Deshpande S, *et al.* Cannabinoids for medical use: A systematic review and meta-analysis. *JAMA - J. Am. Med. Assoc.* 2015;**313**:2456–73. doi:10.1001/jama.2015.6358
- 100 Wong SSC, Chan WS, Cheung CW. Analgesic Effects of Cannabinoids for Chronic Non-cancer Pain: a Systematic Review and Meta-Analysis with Meta-Regression. *J. neuroimmune Pharmacol.* 2020;**15**:801–29. doi:10.1007/s11481-020-09905-y
- 101 Zhang S, Li M, Guo Z. Effect of cannabidiol on schizophrenia based on randomized controlled trials: A meta-analysis. *Ann Médico-psychologiques, Rev Psychiatr* Published Online First: 2021. doi:https://doi.org/10.1016/j.amp.2021.09.019
